# Supplementary material
Source: bioRxiv or medRxiv preprint supplement (https://medrxiv.org/highwire/filestream/88539/field_highwire_adjunct_files/0/2020.06.16.20132464-1.pdf)
Supplement: Supplementary file [file 2020.06.16.20132464-1.pdf]

/\* Relationship between coronavirus and food consumption  
 Corona virus data:  
<https://www.worldometers.info/coronavirus/> 1 June 2020  
 Live Animal production data <http://www.fao.org/faostat/en/#data/QA>  
 S. A. RAFAT \*/

/\*

Domain CodeDomainCountry CodeCountryElement CodeElementItem CodeItemYear CodeYearUnitValueFlagFlag Des  
 Food supply quantity kg/capita/yr 2013 fao stat \*/

data food;

input country \$ element \$ year unit S quantity;

cards;

|             |                      |      |    |        |
|-------------|----------------------|------|----|--------|
| Afghanistan | BovineMeat           | 2013 | kg | 4.59   |
| Afghanistan | ButterGhee           | 2013 | kg | 1.17   |
| Afghanistan | Cheese               | 2013 | kg | 0.79   |
| Afghanistan | Cream                | 2013 | kg | 0.6    |
| Afghanistan | Eggs                 | 2013 | kg | 1.3    |
| Afghanistan | FreshwaterFish       | 2013 | kg | 0.07   |
| Afghanistan | Honey                | 2013 | kg | 0.07   |
| Afghanistan | MilkWhole            | 2013 | kg | 31.92  |
| Afghanistan | PoultryMeat          | 2013 | kg | 2.45   |
| Albania     | AquaticAnimalsOthers | 2013 | kg | 0      |
| Albania     | AquaticPlants        | 2013 | kg | 0      |
| Albania     | BovineMeat           | 2013 | kg | 22.5   |
| Albania     | ButterGhee           | 2013 | kg | 1.19   |
| Albania     | Cephalopods          | 2013 | kg | 0.37   |
| Albania     | Cheese               | 2013 | kg | 6.25   |
| Albania     | Cream                | 2013 | kg | 0.03   |
| Albania     | DemersalFish         | 2013 | kg | 0.98   |
| Albania     | Eggs                 | 2013 | kg | 12.45  |
| Albania     | FreshwaterFish       | 2013 | kg | 0.76   |
| Albania     | Honey                | 2013 | kg | 0.95   |
| Albania     | MarineFishOther      | 2013 | kg | 0.67   |
| Albania     | MilkWhole            | 2013 | kg | 235.18 |
| Albania     | Pigmeat              | 2013 | kg | 10.88  |
| Albania     | PoultryMeat          | 2013 | kg | 13.23  |
| Algeria     | AquaticAnimalsOthers | 2013 | kg | 0      |
| Algeria     | AquaticPlants        | 2013 | kg | 0      |
| Algeria     | BovineMeat           | 2013 | kg | 5.6    |
| Algeria     | ButterGhee           | 2013 | kg | 0.5    |
| Algeria     | Cephalopods          | 2013 | kg | 0.05   |
| Algeria     | Cheese               | 2013 | kg | 0.7    |
| Algeria     | DemersalFish         | 2013 | kg | 0.42   |
| Algeria     | Eggs                 | 2013 | kg | 8.06   |
| Algeria     | FreshwaterFish       | 2013 | kg | 0.34   |
| Algeria     | Honey                | 2013 | kg | 0.17   |
| Algeria     | MarineFishOther      | 2013 | kg | 0.43   |
| Algeria     | MilkWhole            | 2013 | kg | 100.83 |

|                   |                      |      |    |       |  |
|-------------------|----------------------|------|----|-------|--|
| Algeria           | Pigmeat              | 2013 | kg | 0     |  |
| Algeria           | PoultryMeat          | 2013 | kg | 7.42  |  |
| Algeria           | Whey                 | 2013 | kg | 1.05  |  |
| Angola            | AquaticAnimalsOthers | 2013 | kg | 0     |  |
| Angola            | AquaticPlants        | 2013 | kg | 0     |  |
| Angola            | BovineMeat           | 2013 | kg | 8.42  |  |
| Angola            | ButterGhee           | 2013 | kg | 0.09  |  |
| Angola            | Cephalopods          | 2013 | kg | 0.06  |  |
| Angola            | Cheese               | 2013 | kg | 0.24  |  |
| Angola            | DemersalFish         | 2013 | kg | 6.12  |  |
| Angola            | Eggs                 | 2013 | kg | 1.11  |  |
| Angola            | FreshwaterFish       | 2013 | kg | 0.92  |  |
| Angola            | Honey                | 2013 | kg | 1.09  |  |
| Angola            | MarineFishOther      | 2013 | kg | 1.14  |  |
| Angola            | MilkWhole            | 2013 | kg | 9.68  |  |
| Angola            | Pigmeat              | 2013 | kg | 8.89  |  |
| Angola            | PoultryMeat          | 2013 | kg | 17.33 |  |
| AntiguaandBarbuda | AquaticPlants        | 2013 | kg | 0     |  |
| AntiguaandBarbuda | BovineMeat           | 2013 | kg | 12.42 |  |
| AntiguaandBarbuda | ButterGhee           | 2013 | kg | 1.76  |  |
| AntiguaandBarbuda | Cephalopods          | 2013 | kg | 0.3   |  |
| AntiguaandBarbuda | Cheese               | 2013 | kg | 6.08  |  |
| AntiguaandBarbuda | Cream                | 2013 | kg | 1.41  |  |
| AntiguaandBarbuda | DemersalFish         | 2013 | kg | 8.43  |  |
| AntiguaandBarbuda | Eggs                 | 2013 | kg | 4.33  |  |
| AntiguaandBarbuda | FreshwaterFish       | 2013 | kg | 0.74  |  |
| AntiguaandBarbuda | Honey                | 2013 | kg | 0.42  |  |
| AntiguaandBarbuda | MarineFishOther      | 2013 | kg | 18.02 |  |
| AntiguaandBarbuda | MilkWhole            | 2013 | kg | 80.09 |  |
| AntiguaandBarbuda | Pigmeat              | 2013 | kg | 11.44 |  |
| AntiguaandBarbuda | PoultryMeat          | 2013 | kg | 58.82 |  |
| Argentina         | AquaticAnimalsOthers | 2013 | kg | 0     |  |
| Argentina         | AquaticPlants        | 2013 | kg | 0     |  |
| Argentina         | BovineMeat           | 2013 | kg | 55.48 |  |
| Argentina         | ButterGhee           | 2013 | kg | 0.92  |  |
| Argentina         | Cephalopods          | 2013 | kg | 1.51  |  |
| Argentina         | Cheese               | 2013 | kg | 11.96 |  |
| Argentina         | Cream                | 2013 | kg | 0.1   |  |
| Argentina         | DemersalFish         | 2013 | kg | 2.63  |  |
| Argentina         | Eggs                 | 2013 | kg | 11.39 |  |
| Argentina         | FreshwaterFish       | 2013 | kg | 0.21  |  |
| Argentina         | Honey                | 2013 | kg | 0.06  |  |
| Argentina         | MarineFishOther      | 2013 | kg | 0.01  |  |
| Argentina         | MilkWhole            | 2013 | kg | 72.81 |  |
| Argentina         | Pigmeat              | 2013 | kg | 10.51 |  |
| Argentina         | PoultryMeat          | 2013 | kg | 38.66 |  |
| Argentina         | Whey                 | 2013 | kg | 1.74  |  |
| Armenia           | AquaticAnimalsOthers | 2013 | kg | 0     |  |
| Armenia           | AquaticPlants        | 2013 | kg | 0     |  |
| Armenia           | BovineMeat           | 2013 | kg | 19.66 |  |
| Armenia           | ButterGhee           | 2013 | kg | 1.76  |  |
| Armenia           | Cephalopods          | 2013 | kg | 0     |  |
| Armenia           | Cheese               | 2013 | kg | 5.72  |  |
| Armenia           | Cream                | 2013 | kg | 0.01  |  |
| Armenia           | DemersalFish         | 2013 | kg | 0.07  |  |
| Armenia           | Eggs                 | 2013 | kg | 11.69 |  |

|            |                      |      |    |        |  |
|------------|----------------------|------|----|--------|--|
| Armenia    | FreshwaterFish       | 2013 | kg | 3.28   |  |
| Armenia    | Honey                | 2013 | kg | 0.7    |  |
| Armenia    | MarineFishOther      | 2013 | kg | 0.18   |  |
| Armenia    | MilkWhole            | 2013 | kg | 162.96 |  |
| Armenia    | Pigmeat              | 2013 | kg | 9.67   |  |
| Armenia    | PoultryMeat          | 2013 | kg | 13.35  |  |
| Australia  | AquaticAnimalsOthers | 2013 | kg | 0.23   |  |
| Australia  | AquaticPlants        | 2013 | kg | 0      |  |
| Australia  | BovineMeat           | 2013 | kg | 33.86  |  |
| Australia  | ButterGhee           | 2013 | kg | 3.67   |  |
| Australia  | Cephalopods          | 2013 | kg | 1.21   |  |
| Australia  | Cheese               | 2013 | kg | 10.17  |  |
| Australia  | Cream                | 2013 | kg | 0.29   |  |
| Australia  | DemersalFish         | 2013 | kg | 6.88   |  |
| Australia  | Eggs                 | 2013 | kg | 8.51   |  |
| Australia  | FreshwaterFish       | 2013 | kg | 4.11   |  |
| Australia  | Honey                | 2013 | kg | 0.43   |  |
| Australia  | MarineFishOther      | 2013 | kg | 2.18   |  |
| Australia  | MilkWhole            | 2013 | kg | 123.78 |  |
| Australia  | Pigmeat              | 2013 | kg | 24.14  |  |
| Australia  | PoultryMeat          | 2013 | kg | 46.12  |  |
| Austria    | AquaticAnimalsOthers | 2013 | kg | 0.03   |  |
| Austria    | AquaticPlants        | 2013 | kg | 0      |  |
| Austria    | BovineMeat           | 2013 | kg | 17.14  |  |
| Austria    | ButterGhee           | 2013 | kg | 5.54   |  |
| Austria    | Cephalopods          | 2013 | kg | 0.18   |  |
| Austria    | Cheese               | 2013 | kg | 23.29  |  |
| Austria    | Cream                | 2013 | kg | 7.91   |  |
| Austria    | DemersalFish         | 2013 | kg | 2.96   |  |
| Austria    | Eggs                 | 2013 | kg | 14.68  |  |
| Austria    | FreshwaterFish       | 2013 | kg | 4.07   |  |
| Austria    | Honey                | 2013 | kg | 1.32   |  |
| Austria    | MarineFishOther      | 2013 | kg | 0.81   |  |
| Austria    | MilkWhole            | 2013 | kg | 15.83  |  |
| Austria    | Pigmeat              | 2013 | kg | 52.56  |  |
| Austria    | PoultryMeat          | 2013 | kg | 18.61  |  |
| Azerbaijan | AquaticAnimalsOthers | 2013 | kg | 0      |  |
| Azerbaijan | AquaticPlants        | 2013 | kg | 0      |  |
| Azerbaijan | BovineMeat           | 2013 | kg | 12.68  |  |
| Azerbaijan | ButterGhee           | 2013 | kg | 3.2    |  |
| Azerbaijan | Cephalopods          | 2013 | kg | 0      |  |
| Azerbaijan | Cheese               | 2013 | kg | 7.3    |  |
| Azerbaijan | Cream                | 2013 | kg | 0      |  |
| Azerbaijan | DemersalFish         | 2013 | kg | 0.12   |  |
| Azerbaijan | Eggs                 | 2013 | kg | 8.21   |  |
| Azerbaijan | FreshwaterFish       | 2013 | kg | 0.16   |  |
| Azerbaijan | Honey                | 2013 | kg | 0.27   |  |
| Azerbaijan | MarineFishOther      | 2013 | kg | 0.05   |  |
| Azerbaijan | MilkWhole            | 2013 | kg | 89.72  |  |
| Azerbaijan | Pigmeat              | 2013 | kg | 0.25   |  |
| Azerbaijan | PoultryMeat          | 2013 | kg | 10.52  |  |
| Bahamas    | AquaticAnimalsOthers | 2013 | kg | 0.01   |  |
| Bahamas    | AquaticPlants        | 2013 | kg | 0      |  |
| Bahamas    | BovineMeat           | 2013 | kg | 19.92  |  |
| Bahamas    | ButterGhee           | 2013 | kg | 2.4    |  |
| Bahamas    | Cephalopods          | 2013 | kg | 0.18   |  |

|            |                      |      |    |       |      |
|------------|----------------------|------|----|-------|------|
| Bahamas    | Cheese               | 2013 | kg | 10.01 |      |
| Bahamas    | Cream                | 2013 | kg | 0.2   |      |
| Bahamas    | DemersalFish         | 2013 | kg | 3.48  |      |
| Bahamas    | Eggs                 | 2013 | kg | 6.2   |      |
| Bahamas    | FreshwaterFish       | 2013 | kg | 1.05  |      |
| Bahamas    | Honey                | 2013 | kg | 0.46  |      |
| Bahamas    | MarineFishOther      | 2013 | kg | 0.82  |      |
| Bahamas    | MilkWhole            | 2013 | kg | 36.21 |      |
| Bahamas    | Pigmeat              | 2013 | kg | 32.74 |      |
| Bahamas    | PoultryMeat          | 2013 | kg | 45.74 |      |
| Bahamas    | Whey                 | 2013 | kg | 0.32  |      |
| Bangladesh | AquaticAnimalsOthers | 2013 | kg |       | 0    |
| Bangladesh | AquaticPlants        | 2013 | kg | 0     |      |
| Bangladesh | BovineMeat           | 2013 | kg | 1.28  |      |
| Bangladesh | ButterGhee           | 2013 | kg | 0.2   |      |
| Bangladesh | Cephalopods          | 2013 | kg | 0     |      |
| Bangladesh | Cheese               | 2013 | kg | 0.01  |      |
| Bangladesh | Cream                | 2013 | kg | 0     |      |
| Bangladesh | DemersalFish         | 2013 | kg | 0.6   |      |
| Bangladesh | Eggs                 | 2013 | kg | 2.08  |      |
| Bangladesh | FreshwaterFish       | 2013 | kg | 16.26 |      |
| Bangladesh | Honey                | 2013 | kg | 0     |      |
| Bangladesh | MarineFishOther      | 2013 | kg | 0.73  |      |
| Bangladesh | MilkWhole            | 2013 | kg | 19.01 |      |
| Bangladesh | Pigmeat              | 2013 | kg | 0     |      |
| Bangladesh | PoultryMeat          | 2013 | kg | 1.4   |      |
| Barbados   | AquaticPlants        | 2013 | kg | 0     |      |
| Barbados   | BovineMeat           | 2013 | kg | 13.13 |      |
| Barbados   | ButterGhee           | 2013 | kg | 0.75  |      |
| Barbados   | Cephalopods          | 2013 | kg | 0.32  |      |
| Barbados   | Cheese               | 2013 | kg | 8.68  |      |
| Barbados   | Cream                | 2013 | kg | 2.4   |      |
| Barbados   | DemersalFish         | 2013 | kg | 2.7   |      |
| Barbados   | Eggs                 | 2013 | kg | 9.61  |      |
| Barbados   | FreshwaterFish       | 2013 | kg | 0.74  |      |
| Barbados   | Honey                | 2013 | kg | 0.33  |      |
| Barbados   | MarineFishOther      | 2013 | kg | 10.49 |      |
| Barbados   | MilkWhole            | 2013 | kg | 39.29 |      |
| Barbados   | Pigmeat              | 2013 | kg | 8.3   |      |
| Barbados   | PoultryMeat          | 2013 | kg | 42.62 |      |
| Belarus    | AquaticAnimalsOthers | 2013 | kg |       | 0    |
| Belarus    | AquaticPlants        | 2013 | kg | 0     |      |
| Belarus    | BovineMeat           | 2013 | kg | 17.11 |      |
| Belarus    | ButterGhee           | 2013 | kg | 3.53  |      |
| Belarus    | Cephalopods          | 2013 | kg | 0.26  |      |
| Belarus    | Cheese               | 2013 | kg | 1.59  |      |
| Belarus    | Cream                | 2013 | kg | 0.02  |      |
| Belarus    | DemersalFish         | 2013 | kg | 3.32  |      |
| Belarus    | Eggs                 | 2013 | kg | 15.86 |      |
| Belarus    | FreshwaterFish       | 2013 | kg | 3.68  |      |
| Belarus    | Honey                | 2013 | kg | 0.33  |      |
| Belarus    | MarineFishOther      | 2013 | kg | 1.16  |      |
| Belarus    | MilkWhole            | 2013 | kg | 66.8  |      |
| Belarus    | Pigmeat              | 2013 | kg | 40.37 |      |
| Belarus    | PoultryMeat          | 2013 | kg | 31.29 |      |
| Belgium    | AquaticAnimalsOthers | 2013 | kg |       | 0.06 |

|         |                      |      |    |       |   |
|---------|----------------------|------|----|-------|---|
| Belgium | AquaticPlants        | 2013 | kg | 0     |   |
| Belgium | BovineMeat           | 2013 | kg | 15.63 |   |
| Belgium | ButterGhee           | 2013 | kg | 7     |   |
| Belgium | Cephalopods          | 2013 | kg | 0.25  |   |
| Belgium | Cheese               | 2013 | kg | 18.81 |   |
| Belgium | Cream                | 2013 | kg | 9.65  |   |
| Belgium | DemersalFish         | 2013 | kg | 7.32  |   |
| Belgium | Eggs                 | 2013 | kg | 12.59 |   |
| Belgium | FreshwaterFish       | 2013 | kg | 6.58  |   |
| Belgium | Honey                | 2013 | kg | 0.62  |   |
| Belgium | MarineFishOther      | 2013 | kg | 0.66  |   |
| Belgium | MilkWhole            | 2013 | kg | 67.55 |   |
| Belgium | Pigmeat              | 2013 | kg | 38.65 |   |
| Belgium | PoultryMeat          | 2013 | kg | 12.2  |   |
| Belize  | AquaticPlants        | 2013 | kg | 0     |   |
| Belize  | BovineMeat           | 2013 | kg | 4.86  |   |
| Belize  | ButterGhee           | 2013 | kg | 0.28  |   |
| Belize  | Cephalopods          | 2013 | kg | 0.03  |   |
| Belize  | Cheese               | 2013 | kg | 2.91  |   |
| Belize  | Cream                | 2013 | kg | 0.12  |   |
| Belize  | DemersalFish         | 2013 | kg | 1.45  |   |
| Belize  | Eggs                 | 2013 | kg | 4.85  |   |
| Belize  | FreshwaterFish       | 2013 | kg | 0.21  |   |
| Belize  | Honey                | 2013 | kg | 0.14  |   |
| Belize  | MarineFishOther      | 2013 | kg | 0.55  |   |
| Belize  | MilkWhole            | 2013 | kg | 36.96 |   |
| Belize  | Pigmeat              | 2013 | kg | 16.8  |   |
| Belize  | PoultryMeat          | 2013 | kg | 28.31 |   |
| Benin   | AquaticAnimalsOthers | 2013 | kg | 0     | 0 |
| Benin   | AquaticPlants        | 2013 | kg | 0     |   |
| Benin   | BovineMeat           | 2013 | kg | 3.05  |   |
| Benin   | ButterGhee           | 2013 | kg | 0.03  |   |
| Benin   | Cephalopods          | 2013 | kg | 0     |   |
| Benin   | Cheese               | 2013 | kg | 0.04  |   |
| Benin   | Cream                | 2013 | kg | 0.02  |   |
| Benin   | DemersalFish         | 2013 | kg | 0.52  |   |
| Benin   | Eggs                 | 2013 | kg | 0.9   |   |
| Benin   | FreshwaterFish       | 2013 | kg | 2.64  |   |
| Benin   | Honey                | 2013 | kg | 0     |   |
| Benin   | MarineFishOther      | 2013 | kg | 8.51  |   |
| Benin   | MilkWhole            | 2013 | kg | 6.32  |   |
| Benin   | Pigmeat              | 2013 | kg | 0.8   |   |
| Benin   | PoultryMeat          | 2013 | kg | 19.65 |   |
| Bermuda | AquaticPlants        | 2013 | kg | 0     |   |
| Bermuda | BovineMeat           | 2013 | kg | 33.15 |   |
| Bermuda | ButterGhee           | 2013 | kg | 3.02  |   |
| Bermuda | Cephalopods          | 2013 | kg | 1.38  |   |
| Bermuda | Cheese               | 2013 | kg | 6.98  |   |
| Bermuda | Cream                | 2013 | kg | 0     |   |
| Bermuda | DemersalFish         | 2013 | kg | 10.12 |   |
| Bermuda | Eggs                 | 2013 | kg | 14.92 |   |
| Bermuda | FreshwaterFish       | 2013 | kg | 4.84  |   |
| Bermuda | Honey                | 2013 | kg | 0.74  |   |
| Bermuda | MarineFishOther      | 2013 | kg | 9.78  |   |
| Bermuda | MilkWhole            | 2013 | kg | 25.76 |   |
| Bermuda | Pigmeat              | 2013 | kg | 28.24 |   |

|          |                      |      |    |        |      |
|----------|----------------------|------|----|--------|------|
| Bermuda  | PoultryMeat          | 2013 | kg | 32.62  |      |
| Bermuda  | Whey                 | 2013 | kg | 0.42   |      |
| Bolivia  | AquaticAnimalsOthers | 2013 | kg | 0      | 0    |
| Bolivia  | AquaticPlants        | 2013 | kg | 0      |      |
| Bolivia  | BovineMeat           | 2013 | kg | 19.78  |      |
| Bolivia  | ButterGhee           | 2013 | kg | 0.06   |      |
| Bolivia  | Cephalopods          | 2013 | kg | 0      |      |
| Bolivia  | Cheese               | 2013 | kg | 1.09   |      |
| Bolivia  | Cream                | 2013 | kg | 0.03   |      |
| Bolivia  | DemersalFish         | 2013 | kg | 0      |      |
| Bolivia  | Eggs                 | 2013 | kg | 5.18   |      |
| Bolivia  | FreshwaterFish       | 2013 | kg | 0.78   |      |
| Bolivia  | Honey                | 2013 | kg | 0.07   |      |
| Bolivia  | MarineFishOther      | 2013 | kg | 0.91   |      |
| Bolivia  | MilkWhole            | 2013 | kg | 38.72  |      |
| Bolivia  | Pigmeat              | 2013 | kg | 8.89   |      |
| Bolivia  | PoultryMeat          | 2013 | kg | 34.31  |      |
| BosniaH  | AquaticAnimalsOthers | 2013 | kg | 0      | 0    |
| BosniaH  | AquaticPlants        | 2013 | kg | 0      |      |
| BosniaH  | BovineMeat           | 2013 | kg | 9.12   |      |
| BosniaH  | ButterGhee           | 2013 | kg | 0.66   |      |
| BosniaH  | Cephalopods          | 2013 | kg | 0.17   |      |
| BosniaH  | Cheese               | 2013 | kg | 3.13   |      |
| BosniaH  | Cream                | 2013 | kg | 0.69   |      |
| BosniaH  | DemersalFish         | 2013 | kg | 0.97   |      |
| BosniaH  | Eggs                 | 2013 | kg | 4.49   |      |
| BosniaH  | FreshwaterFish       | 2013 | kg | 1.11   |      |
| BosniaH  | Honey                | 2013 | kg | 1.01   |      |
| BosniaH  | MarineFishOther      | 2013 | kg | 0.29   |      |
| BosniaH  | MilkWhole            | 2013 | kg | 142.92 |      |
| BosniaH  | Pigmeat              | 2013 | kg | 9.38   |      |
| BosniaH  | PoultryMeat          | 2013 | kg | 13.17  |      |
| Botswana | AquaticAnimalsOthers | 2013 | kg | 0      | 0    |
| Botswana | AquaticPlants        | 2013 | kg | 0      |      |
| Botswana | BovineMeat           | 2013 | kg | 7.85   |      |
| Botswana | ButterGhee           | 2013 | kg | 0.72   |      |
| Botswana | Cephalopods          | 2013 | kg | 0      |      |
| Botswana | Cheese               | 2013 | kg | 1.49   |      |
| Botswana | Cream                | 2013 | kg | 0.14   |      |
| Botswana | DemersalFish         | 2013 | kg | 0.48   |      |
| Botswana | Eggs                 | 2013 | kg | 1.95   |      |
| Botswana | FreshwaterFish       | 2013 | kg | 0.36   |      |
| Botswana | Honey                | 2013 | kg | 0.04   |      |
| Botswana | MarineFishOther      | 2013 | kg | 0.21   |      |
| Botswana | MilkWhole            | 2013 | kg | 103.61 |      |
| Botswana | Pigmeat              | 2013 | kg | 0.74   |      |
| Botswana | PoultryMeat          | 2013 | kg | 5.33   |      |
| Brazil   | AquaticAnimalsOthers | 2013 | kg | 0.01   | 0.01 |
| Brazil   | AquaticPlants        | 2013 | kg | 0      |      |
| Brazil   | BovineMeat           | 2013 | kg | 39.25  |      |
| Brazil   | ButterGhee           | 2013 | kg | 0.49   |      |
| Brazil   | Cephalopods          | 2013 | kg | 0.04   |      |
| Brazil   | Cheese               | 2013 | kg | 0.37   |      |
| Brazil   | Cream                | 2013 | kg | 0      |      |
| Brazil   | DemersalFish         | 2013 | kg | 3.36   |      |
| Brazil   | Eggs                 | 2013 | kg | 8.98   |      |

|             |                      |      |    |        |  |
|-------------|----------------------|------|----|--------|--|
| Brazil      | FreshwaterFish       | 2013 | kg | 4.94   |  |
| Brazil      | Honey                | 2013 | kg | 0.09   |  |
| Brazil      | MarineFishOther      | 2013 | kg | 0.62   |  |
| Brazil      | MilkWhole            | 2013 | kg | 141.42 |  |
| Brazil      | Pigmeat              | 2013 | kg | 12.6   |  |
| Brazil      | PoultryMeat          | 2013 | kg | 45     |  |
| Brunei      | AquaticAnimalsOthers | 2013 | kg | 0.27   |  |
| Brunei      | AquaticPlants        | 2013 | kg | 0      |  |
| Brunei      | BovineMeat           | 2013 | kg | 12.15  |  |
| Brunei      | ButterGhee           | 2013 | kg | 1.67   |  |
| Brunei      | Cephalopods          | 2013 | kg | 2.63   |  |
| Brunei      | Cheese               | 2013 | kg | 1.61   |  |
| Brunei      | Cream                | 2013 | kg | 0.72   |  |
| Brunei      | DemersalFish         | 2013 | kg | 3.15   |  |
| Brunei      | Eggs                 | 2013 | kg | 16.16  |  |
| Brunei      | FreshwaterFish       | 2013 | kg | 3.14   |  |
| Brunei      | Honey                | 2013 | kg | 0.32   |  |
| Brunei      | MarineFishOther      | 2013 | kg | 21.71  |  |
| Brunei      | MilkWhole            | 2013 | kg | 44.38  |  |
| Brunei      | Pigmeat              | 2013 | kg | 8.35   |  |
| Brunei      | PoultryMeat          | 2013 | kg | 62.87  |  |
| Bulgaria    | AquaticAnimalsOthers | 2013 | kg | 0.02   |  |
| Bulgaria    | AquaticPlants        | 2013 | kg | 0      |  |
| Bulgaria    | BovineMeat           | 2013 | kg | 3.84   |  |
| Bulgaria    | ButterGhee           | 2013 | kg | 0.75   |  |
| Bulgaria    | Cephalopods          | 2013 | kg | 0.1    |  |
| Bulgaria    | Cheese               | 2013 | kg | 9.59   |  |
| Bulgaria    | Cream                | 2013 | kg | 0.01   |  |
| Bulgaria    | DemersalFish         | 2013 | kg | 0.81   |  |
| Bulgaria    | Eggs                 | 2013 | kg | 8.36   |  |
| Bulgaria    | FreshwaterFish       | 2013 | kg | 2.6    |  |
| Bulgaria    | Honey                | 2013 | kg | 0      |  |
| Bulgaria    | MarineFishOther      | 2013 | kg | 0.13   |  |
| Bulgaria    | MilkWhole            | 2013 | kg | 78.95  |  |
| Bulgaria    | Pigmeat              | 2013 | kg | 26.26  |  |
| Bulgaria    | PoultryMeat          | 2013 | kg | 20.68  |  |
| Bulgaria    | Whey                 | 2013 | kg | 0      |  |
| BurkinaFaso | AquaticPlants        | 2013 | kg | 0      |  |
| BurkinaFaso | BovineMeat           | 2013 | kg | 4.48   |  |
| BurkinaFaso | ButterGhee           | 2013 | kg | 0.09   |  |
| BurkinaFaso | Cephalopods          | 2013 | kg | 0      |  |
| BurkinaFaso | Cheese               | 2013 | kg | 0.01   |  |
| BurkinaFaso | Cream                | 2013 | kg | 0      |  |
| BurkinaFaso | DemersalFish         | 2013 | kg | 0      |  |
| BurkinaFaso | Eggs                 | 2013 | kg | 2.61   |  |
| BurkinaFaso | FreshwaterFish       | 2013 | kg | 1.04   |  |
| BurkinaFaso | Honey                | 2013 | kg | 0      |  |
| BurkinaFaso | MarineFishOther      | 2013 | kg | 2.93   |  |
| BurkinaFaso | MilkWhole            | 2013 | kg | 27.24  |  |
| BurkinaFaso | Pigmeat              | 2013 | kg | 1.93   |  |
| BurkinaFaso | PoultryMeat          | 2013 | kg | 2.26   |  |
| BurkinaFaso | Whey                 | 2013 | kg | 0.05   |  |
| CaboVerde   | AquaticAnimalsOthers | 2013 | kg | 0      |  |
| CaboVerde   | AquaticPlants        | 2013 | kg | 0      |  |
| CaboVerde   | BovineMeat           | 2013 | kg | 2      |  |
| CaboVerde   | ButterGhee           | 2013 | kg | 0.17   |  |

|           |                      |      |    |       |  |
|-----------|----------------------|------|----|-------|--|
| CaboVerde | Cephalopods          | 2013 | kg | 0.26  |  |
| CaboVerde | Cheese               | 2013 | kg | 1.24  |  |
| CaboVerde | Cream                | 2013 | kg | 0     |  |
| CaboVerde | DemersalFish         | 2013 | kg | 2.95  |  |
| CaboVerde | Eggs                 | 2013 | kg | 5.08  |  |
| CaboVerde | FreshwaterFish       | 2013 | kg | 0.04  |  |
| CaboVerde | Honey                | 2013 | kg | 0.04  |  |
| CaboVerde | MarineFishOther      | 2013 | kg | 1.73  |  |
| CaboVerde | MilkWhole            | 2013 | kg | 95.58 |  |
| CaboVerde | Pigmeat              | 2013 | kg | 12.04 |  |
| CaboVerde | PoultryMeat          | 2013 | kg | 18.95 |  |
| CaboVerde | Whey                 | 2013 | kg | 0     |  |
| Cambodia  | AquaticAnimalsOthers | 2013 | kg | 0.01  |  |
| Cambodia  | AquaticPlants        | 2013 | kg | 0     |  |
| Cambodia  | BovineMeat           | 2013 | kg | 4.85  |  |
| Cambodia  | ButterGhee           | 2013 | kg | 0.03  |  |
| Cambodia  | Cephalopods          | 2013 | kg | 0.45  |  |
| Cambodia  | Cheese               | 2013 | kg | 0.02  |  |
| Cambodia  | Cream                | 2013 | kg | 0     |  |
| Cambodia  | DemersalFish         | 2013 | kg | 0.02  |  |
| Cambodia  | Eggs                 | 2013 | kg | 1.37  |  |
| Cambodia  | FreshwaterFish       | 2013 | kg | 34    |  |
| Cambodia  | Honey                | 2013 | kg | 0     |  |
| Cambodia  | MarineFishOther      | 2013 | kg | 5.46  |  |
| Cambodia  | MilkWhole            | 2013 | kg | 2.25  |  |
| Cambodia  | Pigmeat              | 2013 | kg | 6.52  |  |
| Cambodia  | PoultryMeat          | 2013 | kg | 1.84  |  |
| Cambodia  | Whey                 | 2013 | kg | 0     |  |
| Cameroon  | AquaticAnimalsOthers | 2013 | kg | 0     |  |
| Cameroon  | AquaticPlants        | 2013 | kg | 0     |  |
| Cameroon  | BovineMeat           | 2013 | kg | 4.17  |  |
| Cameroon  | ButterGhee           | 2013 | kg | 0.01  |  |
| Cameroon  | Cephalopods          | 2013 | kg | 0     |  |
| Cameroon  | Cheese               | 2013 | kg | 0.02  |  |
| Cameroon  | Cream                | 2013 | kg | 0.01  |  |
| Cameroon  | DemersalFish         | 2013 | kg | 2.47  |  |
| Cameroon  | Eggs                 | 2013 | kg | 0.4   |  |
| Cameroon  | FreshwaterFish       | 2013 | kg | 3.92  |  |
| Cameroon  | Honey                | 2013 | kg | 0.2   |  |
| Cameroon  | MarineFishOther      | 2013 | kg | 1.84  |  |
| Cameroon  | MilkWhole            | 2013 | kg | 14.87 |  |
| Cameroon  | Pigmeat              | 2013 | kg | 1.47  |  |
| Cameroon  | PoultryMeat          | 2013 | kg | 3.29  |  |
| Cameroon  | Whey                 | 2013 | kg | 0.06  |  |
| Canada    | AquaticAnimalsOthers | 2013 | kg | 0.09  |  |
| Canada    | AquaticPlants        | 2013 | kg | 0     |  |
| Canada    | BovineMeat           | 2013 | kg | 30.25 |  |
| Canada    | ButterGhee           | 2013 | kg | 2.7   |  |
| Canada    | Cephalopods          | 2013 | kg | 0.06  |  |
| Canada    | Cheese               | 2013 | kg | 12    |  |
| Canada    | Cream                | 2013 | kg | 9.77  |  |
| Canada    | DemersalFish         | 2013 | kg | 4.81  |  |
| Canada    | Eggs                 | 2013 | kg | 12.95 |  |
| Canada    | FreshwaterFish       | 2013 | kg | 5.08  |  |
| Canada    | Honey                | 2013 | kg | 0.79  |  |
| Canada    | MarineFishOther      | 2013 | kg | 0.15  |  |



|                        |                      |      |    |       |  |
|------------------------|----------------------|------|----|-------|--|
| Canada                 | MeatAquaticMammals   | 2013 | kg | 0     |  |
| Canada                 | MilkWhole            | 2013 | kg | 21.19 |  |
| Canada                 | Pigmeat              | 2013 | kg | 22.81 |  |
| Canada                 | PoultryMeat          | 2013 | kg | 36.68 |  |
| Canada                 | Whey                 | 2013 | kg | 9.19  |  |
| CentralAfricanRepublic | AquaticPlants        | 2013 | kg | 0     |  |
| CentralAfricanRepublic | BovineMeat           | 2013 | kg | 11.92 |  |
| CentralAfricanRepublic | ButterGhee           | 2013 | kg | 0     |  |
| CentralAfricanRepublic | Cephalopods          | 2013 | kg | 0     |  |
| CentralAfricanRepublic | Cheese               | 2013 | kg | 0     |  |
| CentralAfricanRepublic | Cream                | 2013 | kg | 0     |  |
| CentralAfricanRepublic | DemersalFish         | 2013 | kg | 0     |  |
| CentralAfricanRepublic | Eggs                 | 2013 | kg | 0.47  |  |
| CentralAfricanRepublic | FreshwaterFish       | 2013 | kg | 6.53  |  |
| CentralAfricanRepublic | Honey                | 2013 | kg | 3.51  |  |
| CentralAfricanRepublic | MarineFishOther      | 2013 | kg | 0.17  |  |
| CentralAfricanRepublic | MilkWhole            | 2013 | kg | 13.05 |  |
| CentralAfricanRepublic | Pigmeat              | 2013 | kg | 3.7   |  |
| CentralAfricanRepublic | PoultryMeat          | 2013 | kg | 1.45  |  |
| Chad                   | AquaticAnimalsOthers | 2013 | kg | 0     |  |
| Chad                   | BovineMeat           | 2013 | kg | 7.67  |  |
| Chad                   | ButterGhee           | 2013 | kg | 0.04  |  |
| Chad                   | Cephalopods          | 2013 | kg | 0     |  |
| Chad                   | Cheese               | 2013 | kg | 0     |  |
| Chad                   | DemersalFish         | 2013 | kg | 0     |  |
| Chad                   | Eggs                 | 2013 | kg | 0.24  |  |
| Chad                   | FreshwaterFish       | 2013 | kg | 4.67  |  |
| Chad                   | Honey                | 2013 | kg | 0.08  |  |
| Chad                   | MarineFishOther      | 2013 | kg | 0     |  |
| Chad                   | MilkWhole            | 2013 | kg | 20.47 |  |
| Chad                   | Pigmeat              | 2013 | kg | 0.05  |  |
| Chad                   | PoultryMeat          | 2013 | kg | 0.42  |  |
| Chile                  | AquaticAnimalsOthers | 2013 | kg | 0.72  |  |
| Chile                  | AquaticPlants        | 2013 | kg | 0     |  |
| Chile                  | BovineMeat           | 2013 | kg | 23.86 |  |
| Chile                  | ButterGhee           | 2013 | kg | 1.24  |  |
| Chile                  | Cephalopods          | 2013 | kg | 1.74  |  |
| Chile                  | Cheese               | 2013 | kg | 6.32  |  |
| Chile                  | Cream                | 2013 | kg | 0.07  |  |
| Chile                  | DemersalFish         | 2013 | kg | 3.31  |  |
| Chile                  | Eggs                 | 2013 | kg | 9.97  |  |
| Chile                  | FreshwaterFish       | 2013 | kg | 0.62  |  |
| Chile                  | Honey                | 2013 | kg | 0.16  |  |
| Chile                  | MarineFishOther      | 2013 | kg | 0.02  |  |
| Chile                  | MeatAquaticMammals   | 2013 | kg | 0     |  |
| Chile                  | MilkWhole            | 2013 | kg | 45.13 |  |
| Chile                  | Pigmeat              | 2013 | kg | 24.68 |  |
| Chile                  | PoultryMeat          | 2013 | kg | 36.52 |  |
| Chile                  | Whey                 | 2013 | kg | 0.13  |  |
| HongKong               | AquaticAnimalsOthers | 2013 | kg | 0.34  |  |
| HongKong               | AquaticPlants        | 2013 | kg | 0     |  |
| HongKong               | BovineMeat           | 2013 | kg | 25.82 |  |
| HongKong               | ButterGhee           | 2013 | kg | 1.24  |  |
| HongKong               | Cephalopods          | 2013 | kg | 3.05  |  |
| HongKong               | Cheese               | 2013 | kg | 1.83  |  |
| HongKong               | Cream                | 2013 | kg | 0.19  |  |

|                       |                      |      |    |       |  |  |
|-----------------------|----------------------|------|----|-------|--|--|
| HongKong              | DemersalFish         | 2013 | kg | 7.42  |  |  |
| HongKong              | Eggs                 | 2013 | kg | 14.5  |  |  |
| HongKong              | FreshwaterFish       | 2013 | kg | 10.11 |  |  |
| HongKong              | Honey                | 2013 | kg | 0.41  |  |  |
| HongKong              | MarineFishOther      | 2013 | kg | 22.34 |  |  |
| HongKong              | MilkWhole            | 2013 | kg | 81.05 |  |  |
| HongKong              | Pigmeat              | 2013 | kg | 67.11 |  |  |
| HongKong              | PoultryMeat          | 2013 | kg | 54.86 |  |  |
| ChinaMacaoSAR         | AquaticAnimalsOthers | 2013 | kg | 0.21  |  |  |
| ChinaMacaoSAR         | AquaticPlants        | 2013 | kg | 0     |  |  |
| ChinaMacaoSAR         | BovineMeat           | 2013 | kg | 10.4  |  |  |
| ChinaMacaoSAR         | ButterGhee           | 2013 | kg | 0.87  |  |  |
| ChinaMacaoSAR         | Cephalopods          | 2013 | kg | 2.19  |  |  |
| ChinaMacaoSAR         | Cheese               | 2013 | kg | 0.96  |  |  |
| ChinaMacaoSAR         | Cream                | 2013 | kg | 1.24  |  |  |
| ChinaMacaoSAR         | DemersalFish         | 2013 | kg | 1.1   |  |  |
| ChinaMacaoSAR         | Eggs                 | 2013 | kg | 14.95 |  |  |
| ChinaMacaoSAR         | FreshwaterFish       | 2013 | kg | 12.8  |  |  |
| ChinaMacaoSAR         | Honey                | 2013 | kg | 0.14  |  |  |
| ChinaMacaoSAR         | MarineFishOther      | 2013 | kg | 17.48 |  |  |
| ChinaMacaoSAR         | MilkWhole            | 2013 | kg | 28.6  |  |  |
| ChinaMacaoSAR         | Pigmeat              | 2013 | kg | 71.48 |  |  |
| ChinaMacaoSAR         | PoultryMeat          | 2013 | kg | 36.26 |  |  |
| ChinaMacaoSAR         | Whey                 | 2013 | kg | 0     |  |  |
| China                 | AquaticAnimalsOthers | 2013 | kg | 0.68  |  |  |
| China                 | AquaticPlants        | 2013 | kg | 9.44  |  |  |
| China                 | BovineMeat           | 2013 | kg | 5.12  |  |  |
| China                 | ButterGhee           | 2013 | kg | 0.11  |  |  |
| China                 | Cephalopods          | 2013 | kg | 0.74  |  |  |
| China                 | Cheese               | 2013 | kg | 0.22  |  |  |
| China                 | Cream                | 2013 | kg | 0     |  |  |
| China                 | DemersalFish         | 2013 | kg | 3.37  |  |  |
| China                 | Eggs                 | 2013 | kg | 18.76 |  |  |
| China                 | FreshwaterFish       | 2013 | kg | 16.04 |  |  |
| China                 | Honey                | 2013 | kg | 0.24  |  |  |
| China                 | MarineFishOther      | 2013 | kg | 1.29  |  |  |
| China                 | MilkWhole            | 2013 | kg | 29.39 |  |  |
| China                 | Pigmeat              | 2013 | kg | 38.43 |  |  |
| China                 | PoultryMeat          | 2013 | kg | 13.2  |  |  |
| ChinaTaiwanProvinceof | AquaticAnimalsOthers | 2013 | kg | 0.4   |  |  |
| ChinaTaiwanProvinceof | AquaticPlants        | 2013 | kg | 0     |  |  |
| ChinaTaiwanProvinceof | BovineMeat           | 2013 | kg | 5.21  |  |  |
| ChinaTaiwanProvinceof | ButterGhee           | 2013 | kg | 0.74  |  |  |
| ChinaTaiwanProvinceof | Cephalopods          | 2013 | kg | 5.19  |  |  |
| ChinaTaiwanProvinceof | Cheese               | 2013 | kg | 0.97  |  |  |
| ChinaTaiwanProvinceof | Cream                | 2013 | kg | 0.3   |  |  |
| ChinaTaiwanProvinceof | DemersalFish         | 2013 | kg | 3.83  |  |  |
| ChinaTaiwanProvinceof | Eggs                 | 2013 | kg | 13.08 |  |  |
| ChinaTaiwanProvinceof | FreshwaterFish       | 2013 | kg | 7.3   |  |  |
| ChinaTaiwanProvinceof | Honey                | 2013 | kg | 0.72  |  |  |
| ChinaTaiwanProvinceof | MarineFishOther      | 2013 | kg | 3.09  |  |  |
| ChinaTaiwanProvinceof | MilkWhole            | 2013 | kg | 26.12 |  |  |
| ChinaTaiwanProvinceof | Pigmeat              | 2013 | kg | 39.37 |  |  |
| ChinaTaiwanProvinceof | PoultryMeat          | 2013 | kg | 32.13 |  |  |
| Colombia              | AquaticAnimalsOthers | 2013 | kg | 0     |  |  |
| Colombia              | AquaticPlants        | 2013 | kg | 0     |  |  |

|           |                      |      |    |        |  |
|-----------|----------------------|------|----|--------|--|
| Colombia  | BovineMeat           | 2013 | kg | 16.36  |  |
| Colombia  | ButterGhee           | 2013 | kg | 0.43   |  |
| Colombia  | Cephalopods          | 2013 | kg | 0.09   |  |
| Colombia  | Cheese               | 2013 | kg | 1.24   |  |
| Colombia  | Cream                | 2013 | kg | 0.02   |  |
| Colombia  | DemersalFish         | 2013 | kg | 0.12   |  |
| Colombia  | Eggs                 | 2013 | kg | 10.78  |  |
| Colombia  | FreshwaterFish       | 2013 | kg | 3.14   |  |
| Colombia  | Honey                | 2013 | kg | 0.04   |  |
| Colombia  | MarineFishOther      | 2013 | kg | 0.15   |  |
| Colombia  | MilkWhole            | 2013 | kg | 99.26  |  |
| Colombia  | Pigmeat              | 2013 | kg | 6.51   |  |
| Colombia  | PoultryMeat          | 2013 | kg | 27.57  |  |
| Congo     | AquaticAnimalsOthers | 2013 | kg | 0      |  |
| Congo     | AquaticPlants        | 2013 | kg | 0      |  |
| Congo     | BovineMeat           | 2013 | kg | 4.35   |  |
| Congo     | ButterGhee           | 2013 | kg | 0.04   |  |
| Congo     | Cephalopods          | 2013 | kg | 0.02   |  |
| Congo     | Cheese               | 2013 | kg | 0.08   |  |
| Congo     | Cream                | 2013 | kg | 0.02   |  |
| Congo     | DemersalFish         | 2013 | kg | 7.77   |  |
| Congo     | Eggs                 | 2013 | kg | 0.6    |  |
| Congo     | FreshwaterFish       | 2013 | kg | 8.18   |  |
| Congo     | Honey                | 2013 | kg | 0.01   |  |
| Congo     | MarineFishOther      | 2013 | kg | 1.11   |  |
| Congo     | MilkWhole            | 2013 | kg | 9.29   |  |
| Congo     | Pigmeat              | 2013 | kg | 2.39   |  |
| Congo     | PoultryMeat          | 2013 | kg | 13.02  |  |
| CostaRica | AquaticAnimalsOthers | 2013 | kg | 0.02   |  |
| CostaRica | AquaticPlants        | 2013 | kg | 0      |  |
| CostaRica | BovineMeat           | 2013 | kg | 15.23  |  |
| CostaRica | ButterGhee           | 2013 | kg | 1.33   |  |
| CostaRica | Cephalopods          | 2013 | kg | 0.29   |  |
| CostaRica | Cheese               | 2013 | kg | 2.97   |  |
| CostaRica | DemersalFish         | 2013 | kg | 0.6    |  |
| CostaRica | Eggs                 | 2013 | kg | 10.55  |  |
| CostaRica | FreshwaterFish       | 2013 | kg | 5.97   |  |
| CostaRica | Honey                | 2013 | kg | 0.26   |  |
| CostaRica | MarineFishOther      | 2013 | kg | 0.6    |  |
| CostaRica | MilkWhole            | 2013 | kg | 151.89 |  |
| CostaRica | Pigmeat              | 2013 | kg | 10.28  |  |
| CostaRica | PoultryMeat          | 2013 | kg | 24.47  |  |
| Ivorycote | AquaticAnimalsOthers | 2013 | kg | 0      |  |
| IvoryCoa  | AquaticPlants        | 2013 | kg | 0      |  |
| IvoryCoa  | BovineMeat           | 2013 | kg | 1.7    |  |
| IvoryCoa  | ButterGhee           | 2013 | kg | 0.02   |  |
| IvoryCoa  | Cephalopods          | 2013 | kg | 0      |  |
| IvoryCoa  | Cheese               | 2013 | kg | 0.04   |  |
| IvoryCoa  | Cream                | 2013 | kg | 0.06   |  |
| IvoryCoa  | DemersalFish         | 2013 | kg | 0.33   |  |
| IvoryCoa  | Eggs                 | 2013 | kg | 1.95   |  |
| IvoryCoa  | FreshwaterFish       | 2013 | kg | 0.54   |  |
| IvoryCoa  | Honey                | 2013 | kg | 0.03   |  |
| IvoryCoa  | MarineFishOther      | 2013 | kg | 8.01   |  |
| IvoryCoa  | MilkWhole            | 2013 | kg | 5.28   |  |
| IvoryCoa  | Pigmeat              | 2013 | kg | 1.76   |  |

|          |                      |      |    |        |      |
|----------|----------------------|------|----|--------|------|
| IvoryCoa | PoultryMeat          | 2013 | kg | 2.4    |      |
| IvoryCoa | Whey                 | 2013 | kg | 0.91   |      |
| Croatia  | AquaticAnimalsOthers | 2013 | kg | 0      | 0.08 |
| Croatia  | AquaticPlants        | 2013 | kg | 0      |      |
| Croatia  | BovineMeat           | 2013 | kg | 12.41  |      |
| Croatia  | ButterGhee           | 2013 | kg | 1.19   |      |
| Croatia  | Cephalopods          | 2013 | kg | 1.87   |      |
| Croatia  | Cheese               | 2013 | kg | 10.4   |      |
| Croatia  | Cream                | 2013 | kg | 0      |      |
| Croatia  | DemersalFish         | 2013 | kg | 3.7    |      |
| Croatia  | Eggs                 | 2013 | kg | 8.48   |      |
| Croatia  | FreshwaterFish       | 2013 | kg | 1.39   |      |
| Croatia  | Honey                | 2013 | kg | 0.7    |      |
| Croatia  | MarineFishOther      | 2013 | kg | 1.26   |      |
| Croatia  | MilkWhole            | 2013 | kg | 113.76 |      |
| Croatia  | Pigmeat              | 2013 | kg | 42.79  |      |
| Croatia  | PoultryMeat          | 2013 | kg | 8.52   |      |
| Cuba     | AquaticAnimalsOthers | 2013 | kg | 0      |      |
| Cuba     | AquaticPlants        | 2013 | kg | 0      |      |
| Cuba     | BovineMeat           | 2013 | kg | 6.39   |      |
| Cuba     | ButterGhee           | 2013 | kg | 0.26   |      |
| Cuba     | Cephalopods          | 2013 | kg | 0.05   |      |
| Cuba     | Cheese               | 2013 | kg | 1.47   |      |
| Cuba     | Cream                | 2013 | kg | 0      |      |
| Cuba     | DemersalFish         | 2013 | kg | 0.89   |      |
| Cuba     | Eggs                 | 2013 | kg | 9.82   |      |
| Cuba     | FreshwaterFish       | 2013 | kg | 2.37   |      |
| Cuba     | Honey                | 2013 | kg | 0.13   |      |
| Cuba     | MarineFishOther      | 2013 | kg | 0.34   |      |
| Cuba     | MilkWhole            | 2013 | kg | 74.94  |      |
| Cuba     | Pigmeat              | 2013 | kg | 19.82  |      |
| Cuba     | PoultryMeat          | 2013 | kg | 20.15  |      |
| Cuba     | Whey                 | 2013 | kg | 0      |      |
| Cyprus   | AquaticAnimalsOthers | 2013 | kg | 0      | 0.19 |
| Cyprus   | AquaticPlants        | 2013 | kg | 0      |      |
| Cyprus   | BovineMeat           | 2013 | kg | 5.79   |      |
| Cyprus   | ButterGhee           | 2013 | kg | 0.94   |      |
| Cyprus   | Cephalopods          | 2013 | kg | 3.1    |      |
| Cyprus   | Cheese               | 2013 | kg | 3.35   |      |
| Cyprus   | Cream                | 2013 | kg | 0      |      |
| Cyprus   | DemersalFish         | 2013 | kg | 4.33   |      |
| Cyprus   | Eggs                 | 2013 | kg | 8.98   |      |
| Cyprus   | FreshwaterFish       | 2013 | kg | 5.76   |      |
| Cyprus   | Honey                | 2013 | kg | 0.61   |      |
| Cyprus   | MarineFishOther      | 2013 | kg | 0.61   |      |
| Cyprus   | MilkWhole            | 2013 | kg | 83.55  |      |
| Cyprus   | Pigmeat              | 2013 | kg | 38.38  |      |
| Cyprus   | PoultryMeat          | 2013 | kg | 24.45  |      |
| Czechia  | AquaticAnimalsOthers | 2013 | kg | 0      | 0    |
| Czechia  | AquaticPlants        | 2013 | kg | 0      |      |
| Czechia  | BovineMeat           | 2013 | kg | 8.15   |      |
| Czechia  | ButterGhee           | 2013 | kg | 5.15   |      |
| Czechia  | Cephalopods          | 2013 | kg | 0.03   |      |
| Czechia  | Cheese               | 2013 | kg | 16.14  |      |
| Czechia  | Cream                | 2013 | kg | 4.06   |      |
| Czechia  | DemersalFish         | 2013 | kg | 2.06   |      |

|          |                      |      |    |       |  |
|----------|----------------------|------|----|-------|--|
| Czechia  | Eggs                 | 2013 | kg | 11.66 |  |
| Czechia  | FreshwaterFish       | 2013 | kg | 2.96  |  |
| Czechia  | Honey                | 2013 | kg | 0.8   |  |
| Czechia  | MarineFishOther      | 2013 | kg | 0.56  |  |
| Czechia  | MilkWhole            | 2013 | kg | 31.71 |  |
| Czechia  | Pigmeat              | 2013 | kg | 41.17 |  |
| Czechia  | PoultryMeat          | 2013 | kg | 19.09 |  |
| Nkorea   | AquaticAnimalsOthers | 2013 | kg | 0.01  |  |
| Nkorea   | AquaticPlants        | 2013 | kg | 0     |  |
| Nkorea   | BovineMeat           | 2013 | kg | 0.88  |  |
| Nkorea   | ButterGhee           | 2013 | kg | 0.01  |  |
| Nkorea   | Cephalopods          | 2013 | kg | 0.43  |  |
| Nkorea   | DemersalFish         | 2013 | kg | 3.51  |  |
| Nkorea   | Eggs                 | 2013 | kg | 4.68  |  |
| Nkorea   | FreshwaterFish       | 2013 | kg | 0.38  |  |
| Nkorea   | MarineFishOther      | 2013 | kg | 4.08  |  |
| Nkorea   | MilkWhole            | 2013 | kg | 3.74  |  |
| Nkorea   | Pigmeat              | 2013 | kg | 4.7   |  |
| Nkorea   | PoultryMeat          | 2013 | kg | 1.76  |  |
| Denmark  | AquaticAnimalsOthers | 2013 | kg | 0.02  |  |
| Denmark  | AquaticPlants        | 2013 | kg | 0     |  |
| Denmark  | BovineMeat           | 2013 | kg | 28.46 |  |
| Denmark  | ButterGhee           | 2013 | kg | 1.78  |  |
| Denmark  | Cephalopods          | 2013 | kg | 0.05  |  |
| Denmark  | Cheese               | 2013 | kg | 19.83 |  |
| Denmark  | Cream                | 2013 | kg | 9.14  |  |
| Denmark  | DemersalFish         | 2013 | kg | 5.06  |  |
| Denmark  | Eggs                 | 2013 | kg | 15.35 |  |
| Denmark  | FreshwaterFish       | 2013 | kg | 0.75  |  |
| Denmark  | Honey                | 2013 | kg | 0.71  |  |
| Denmark  | MarineFishOther      | 2013 | kg | 0.06  |  |
| Denmark  | MilkWhole            | 2013 | kg | 47.65 |  |
| Denmark  | Pigmeat              | 2013 | kg | 24.87 |  |
| Denmark  | PoultryMeat          | 2013 | kg | 26.75 |  |
| Denmark  | Whey                 | 2013 | kg | 9.09  |  |
| Djibouti | AquaticAnimalsOthers | 2013 | kg | 0     |  |
| Djibouti | AquaticPlants        | 2013 | kg | 0     |  |
| Djibouti | BovineMeat           | 2013 | kg | 10    |  |
| Djibouti | ButterGhee           | 2013 | kg | 0.12  |  |
| Djibouti | Cephalopods          | 2013 | kg | 0     |  |
| Djibouti | Cheese               | 2013 | kg | 0.16  |  |
| Djibouti | Cream                | 2013 | kg | 0.04  |  |
| Djibouti | DemersalFish         | 2013 | kg | 0.64  |  |
| Djibouti | Eggs                 | 2013 | kg | 0.7   |  |
| Djibouti | FreshwaterFish       | 2013 | kg | 0.01  |  |
| Djibouti | Honey                | 2013 | kg | 0.02  |  |
| Djibouti | MarineFishOther      | 2013 | kg | 0.39  |  |
| Djibouti | MilkWhole            | 2013 | kg | 58.72 |  |
| Djibouti | Pigmeat              | 2013 | kg | 0.17  |  |
| Djibouti | PoultryMeat          | 2013 | kg | 2.05  |  |
| Dominica | AquaticAnimalsOthers | 2013 | kg | 0     |  |
| Dominica | AquaticPlants        | 2013 | kg | 0     |  |
| Dominica | BovineMeat           | 2013 | kg | 8.72  |  |
| Dominica | ButterGhee           | 2013 | kg | 0.07  |  |
| Dominica | Cephalopods          | 2013 | kg | 0.01  |  |
| Dominica | Cheese               | 2013 | kg | 3.16  |  |

|          |                      |      |    |       |  |
|----------|----------------------|------|----|-------|--|
| Dominica | Cream                | 2013 | kg | 0.08  |  |
| Dominica | DemersalFish         | 2013 | kg | 3.87  |  |
| Dominica | Eggs                 | 2013 | kg | 2.53  |  |
| Dominica | FreshwaterFish       | 2013 | kg | 0.12  |  |
| Dominica | Honey                | 2013 | kg | 0     |  |
| Dominica | MarineFishOther      | 2013 | kg | 3.39  |  |
| Dominica | MilkWhole            | 2013 | kg | 88.33 |  |
| Dominica | Pigmeat              | 2013 | kg | 10.88 |  |
| Dominica | PoultryMeat          | 2013 | kg | 31.2  |  |
| Dominica | Whey                 | 2013 | kg | 0     |  |
| Dominr   | AquaticAnimalsOthers | 2013 | kg | 0     |  |
| Dominr   | AquaticPlants        | 2013 | kg | 0     |  |
| Dominr   | BovineMeat           | 2013 | kg | 9.88  |  |
| Dominr   | ButterGhee           | 2013 | kg | 0.27  |  |
| Dominr   | Cephalopods          | 2013 | kg | 0.1   |  |
| Dominr   | Cheese               | 2013 | kg | 1.07  |  |
| Dominr   | DemersalFish         | 2013 | kg | 3.22  |  |
| Dominr   | Eggs                 | 2013 | kg | 7.19  |  |
| Dominr   | FreshwaterFish       | 2013 | kg | 0.34  |  |
| Dominr   | Honey                | 2013 | kg | 0.42  |  |
| Dominr   | MarineFishOther      | 2013 | kg | 0.44  |  |
| Dominr   | MilkWhole            | 2013 | kg | 53.73 |  |
| Dominr   | Pigmeat              | 2013 | kg | 9.51  |  |
| Dominr   | PoultryMeat          | 2013 | kg | 27.56 |  |
| Ecuador  | AquaticAnimalsOthers | 2013 | kg | 0     |  |
| Ecuador  | AquaticPlants        | 2013 | kg | 0     |  |
| Ecuador  | BovineMeat           | 2013 | kg | 16.61 |  |
| Ecuador  | ButterGhee           | 2013 | kg | 0.15  |  |
| Ecuador  | Cephalopods          | 2013 | kg | 0.02  |  |
| Ecuador  | Cheese               | 2013 | kg | 6.19  |  |
| Ecuador  | Cream                | 2013 | kg | 0.19  |  |
| Ecuador  | DemersalFish         | 2013 | kg | 0.3   |  |
| Ecuador  | Eggs                 | 2013 | kg | 8.01  |  |
| Ecuador  | FreshwaterFish       | 2013 | kg | 1.49  |  |
| Ecuador  | Honey                | 2013 | kg | 0.07  |  |
| Ecuador  | MarineFishOther      | 2013 | kg | 0.3   |  |
| Ecuador  | MilkWhole            | 2013 | kg | 92.08 |  |
| Ecuador  | Pigmeat              | 2013 | kg | 14.44 |  |
| Ecuador  | PoultryMeat          | 2013 | kg | 21.85 |  |
| Ecuador  | Whey                 | 2013 | kg | 0.03  |  |
| Egypt    | AquaticAnimalsOthers | 2013 | kg | 0     |  |
| Egypt    | AquaticPlants        | 2013 | kg | 0     |  |
| Egypt    | BovineMeat           | 2013 | kg | 12.88 |  |
| Egypt    | ButterGhee           | 2013 | kg | 1.96  |  |
| Egypt    | Cephalopods          | 2013 | kg | 0.15  |  |
| Egypt    | Cheese               | 2013 | kg | 6.91  |  |
| Egypt    | Cream                | 2013 | kg | 0.04  |  |
| Egypt    | DemersalFish         | 2013 | kg | 3.64  |  |
| Egypt    | Eggs                 | 2013 | kg | 4.59  |  |
| Egypt    | FreshwaterFish       | 2013 | kg | 13.92 |  |
| Egypt    | Honey                | 2013 | kg | 0.05  |  |
| Egypt    | MarineFishOther      | 2013 | kg | 0.32  |  |
| Egypt    | MilkWhole            | 2013 | kg | 21.52 |  |
| Egypt    | Pigmeat              | 2013 | kg | 0.02  |  |
| Egypt    | PoultryMeat          | 2013 | kg | 14.43 |  |
| Egypt    | Whey                 | 2013 | kg | 2.6   |  |

|            |                      |      |    |       |
|------------|----------------------|------|----|-------|
| ElSalvador | AquaticAnimalsOthers | 2013 | kg | 0     |
| ElSalvador | AquaticPlants        | 2013 | kg | 0     |
| ElSalvador | BovineMeat           | 2013 | kg | 5.95  |
| ElSalvador | ButterGhee           | 2013 | kg | 0.09  |
| ElSalvador | Cephalopods          | 2013 | kg | 0.03  |
| ElSalvador | Cheese               | 2013 | kg | 5.19  |
| ElSalvador | Cream                | 2013 | kg | 0.01  |
| ElSalvador | DemersalFish         | 2013 | kg | 0.01  |
| ElSalvador | Eggs                 | 2013 | kg | 9.51  |
| ElSalvador | FreshwaterFish       | 2013 | kg | 0.97  |
| ElSalvador | Honey                | 2013 | kg | 0.01  |
| ElSalvador | MarineFishOther      | 2013 | kg | 2.14  |
| ElSalvador | MilkWhole            | 2013 | kg | 78.44 |
| ElSalvador | Pigmeat              | 2013 | kg | 3.23  |
| ElSalvador | PoultryMeat          | 2013 | kg | 19.84 |
| Estonia    | AquaticAnimalsOthers | 2013 | kg | 0     |
| Estonia    | AquaticPlants        | 2013 | kg | 0     |
| Estonia    | BovineMeat           | 2013 | kg | 7.19  |
| Estonia    | ButterGhee           | 2013 | kg | 1.63  |
| Estonia    | Cephalopods          | 2013 | kg | 0.4   |
| Estonia    | Cheese               | 2013 | kg | 7.98  |
| Estonia    | Cream                | 2013 | kg | 1.74  |
| Estonia    | DemersalFish         | 2013 | kg | 7.37  |
| Estonia    | Eggs                 | 2013 | kg | 12.66 |
| Estonia    | FreshwaterFish       | 2013 | kg | 2.59  |
| Estonia    | Honey                | 2013 | kg | 0.9   |
| Estonia    | MarineFishOther      | 2013 | kg | 0.05  |
| Estonia    | MilkWhole            | 2013 | kg | 165.8 |
| Estonia    | Pigmeat              | 2013 | kg | 29.68 |
| Estonia    | PoultryMeat          | 2013 | kg | 21.11 |
| Ethiopia   | AquaticPlants        | 2013 | kg | 0     |
| Ethiopia   | BovineMeat           | 2013 | kg | 3.61  |
| Ethiopia   | ButterGhee           | 2013 | kg | 0.19  |
| Ethiopia   | Cephalopods          | 2013 | kg | 0     |
| Ethiopia   | Cheese               | 2013 | kg | 0.06  |
| Ethiopia   | Cream                | 2013 | kg | 0     |
| Ethiopia   | DemersalFish         | 2013 | kg | 0     |
| Ethiopia   | Eggs                 | 2013 | kg | 0.36  |
| Ethiopia   | FreshwaterFish       | 2013 | kg | 0.23  |
| Ethiopia   | Honey                | 2013 | kg | 0.47  |
| Ethiopia   | MarineFishOther      | 2013 | kg | 0     |
| Ethiopia   | MilkWhole            | 2013 | kg | 40.01 |
| Ethiopia   | Pigmeat              | 2013 | kg | 0.02  |
| Ethiopia   | PoultryMeat          | 2013 | kg | 0.66  |
| Fiji       | AquaticAnimalsOthers | 2013 | kg | 0.24  |
| Fiji       | AquaticPlants        | 2013 | kg | 0     |
| Fiji       | BovineMeat           | 2013 | kg | 8.96  |
| Fiji       | ButterGhee           | 2013 | kg | 4.52  |
| Fiji       | Cephalopods          | 2013 | kg | 0.12  |
| Fiji       | Cheese               | 2013 | kg | 0.58  |
| Fiji       | Cream                | 2013 | kg | 0.04  |
| Fiji       | DemersalFish         | 2013 | kg | 3.71  |
| Fiji       | Eggs                 | 2013 | kg | 6.44  |
| Fiji       | FreshwaterFish       | 2013 | kg | 1.13  |
| Fiji       | Honey                | 2013 | kg | 0.45  |
| Fiji       | MarineFishOther      | 2013 | kg | 7.3   |

|                 |                      |      |    |        |  |      |
|-----------------|----------------------|------|----|--------|--|------|
| Fiji            | MilkWhole            | 2013 | kg | 32.6   |  |      |
| Fiji            | Pigmeat              | 2013 | kg | 4.31   |  |      |
| Fiji            | PoultryMeat          | 2013 | kg | 20.26  |  |      |
| Fiji            | Whey                 | 2013 | kg | 1.29   |  |      |
| Finland         | AquaticAnimalsOthers | 2013 | kg | 0      |  | 0.02 |
| Finland         | AquaticPlants        | 2013 | kg | 0      |  |      |
| Finland         | BovineMeat           | 2013 | kg | 19.22  |  |      |
| Finland         | ButterGhee           | 2013 | kg | 5      |  |      |
| Finland         | Cephalopods          | 2013 | kg | 0.02   |  |      |
| Finland         | Cheese               | 2013 | kg | 23.1   |  |      |
| Finland         | Cream                | 2013 | kg | 5.76   |  |      |
| Finland         | DemersalFish         | 2013 | kg | 3.08   |  |      |
| Finland         | Eggs                 | 2013 | kg | 9.55   |  |      |
| Finland         | FreshwaterFish       | 2013 | kg | 15.32  |  |      |
| Finland         | Honey                | 2013 | kg | 0.56   |  |      |
| Finland         | MarineFishOther      | 2013 | kg | 1.77   |  |      |
| Finland         | MilkWhole            | 2013 | kg | 113.15 |  |      |
| Finland         | Pigmeat              | 2013 | kg | 36.14  |  |      |
| Finland         | PoultryMeat          | 2013 | kg | 19.87  |  |      |
| France          | AquaticAnimalsOthers | 2013 | kg | 0      |  | 0.07 |
| France          | AquaticPlants        | 2013 | kg | 0      |  |      |
| France          | BovineMeat           | 2013 | kg | 23.81  |  |      |
| France          | ButterGhee           | 2013 | kg | 7.98   |  |      |
| France          | Cephalopods          | 2013 | kg | 0.48   |  |      |
| France          | Cheese               | 2013 | kg | 23.66  |  |      |
| France          | Cream                | 2013 | kg | 4      |  |      |
| France          | DemersalFish         | 2013 | kg | 11.6   |  |      |
| France          | Eggs                 | 2013 | kg | 13.13  |  |      |
| France          | FreshwaterFish       | 2013 | kg | 4.24   |  |      |
| France          | Honey                | 2013 | kg | 0.55   |  |      |
| France          | MarineFishOther      | 2013 | kg | 0.18   |  |      |
| France          | MilkWhole            | 2013 | kg | 40.51  |  |      |
| France          | Pigmeat              | 2013 | kg | 33.05  |  |      |
| France          | PoultryMeat          | 2013 | kg | 22.93  |  |      |
| France          | Whey                 | 2013 | kg | 0.06   |  |      |
| FrenchPolynesia | AquaticAnimalsOthers | 2013 | kg | 0      |  | 1.63 |
| FrenchPolynesia | AquaticPlants        | 2013 | kg | 0      |  |      |
| FrenchPolynesia | BovineMeat           | 2013 | kg | 30.9   |  |      |
| FrenchPolynesia | ButterGhee           | 2013 | kg | 4.28   |  |      |
| FrenchPolynesia | Cephalopods          | 2013 | kg | 0.12   |  |      |
| FrenchPolynesia | Cheese               | 2013 | kg | 5.42   |  |      |
| FrenchPolynesia | Cream                | 2013 | kg | 4.73   |  |      |
| FrenchPolynesia | DemersalFish         | 2013 | kg | 0.47   |  |      |
| FrenchPolynesia | Eggs                 | 2013 | kg | 8.75   |  |      |
| FrenchPolynesia | FreshwaterFish       | 2013 | kg | 2.01   |  |      |
| FrenchPolynesia | Honey                | 2013 | kg | 0.42   |  |      |
| FrenchPolynesia | MarineFishOther      | 2013 | kg | 12.11  |  |      |
| FrenchPolynesia | MilkWhole            | 2013 | kg | 52.33  |  |      |
| FrenchPolynesia | Pigmeat              | 2013 | kg | 14.75  |  |      |
| FrenchPolynesia | PoultryMeat          | 2013 | kg | 49.55  |  |      |
| FrenchPolynesia | Whey                 | 2013 | kg | 0      |  |      |
| Gabon           | AquaticAnimalsOthers | 2013 | kg | 0      |  |      |
| Gabon           | AquaticPlants        | 2013 | kg | 0      |  |      |
| Gabon           | BovineMeat           | 2013 | kg | 8.6    |  |      |
| Gabon           | ButterGhee           | 2013 | kg | 0.23   |  |      |
| Gabon           | Cephalopods          | 2013 | kg | 0.17   |  |      |



|         |                      |      |    |        |  |
|---------|----------------------|------|----|--------|--|
| Gabon   | Cheese               | 2013 | kg | 0.5    |  |
| Gabon   | Cream                | 2013 | kg | 0.13   |  |
| Gabon   | DemersalFish         | 2013 | kg | 5.23   |  |
| Gabon   | Eggs                 | 2013 | kg | 1.22   |  |
| Gabon   | FreshwaterFish       | 2013 | kg | 6.5    |  |
| Gabon   | Honey                | 2013 | kg | 0.01   |  |
| Gabon   | MarineFishOther      | 2013 | kg | 5.76   |  |
| Gabon   | MilkWhole            | 2013 | kg | 23.14  |  |
| Gabon   | Pigmeat              | 2013 | kg | 10.36  |  |
| Gabon   | PoultryMeat          | 2013 | kg | 33     |  |
| Gabon   | Whey                 | 2013 | kg | 0      |  |
| Gambia  | BovineMeat           | 2013 | kg | 2.16   |  |
| Gambia  | ButterGhee           | 2013 | kg | 0.1    |  |
| Gambia  | Cephalopods          | 2013 | kg | 0.05   |  |
| Gambia  | Cheese               | 2013 | kg | 0.06   |  |
| Gambia  | Cream                | 2013 | kg | 0.19   |  |
| Gambia  | DemersalFish         | 2013 | kg | 7.4    |  |
| Gambia  | Eggs                 | 2013 | kg | 0.99   |  |
| Gambia  | FreshwaterFish       | 2013 | kg | 2.44   |  |
| Gambia  | Honey                | 2013 | kg | 0      |  |
| Gambia  | MarineFishOther      | 2013 | kg | 1.14   |  |
| Gambia  | MilkWhole            | 2013 | kg | 44.98  |  |
| Gambia  | Pigmeat              | 2013 | kg | 0.18   |  |
| Gambia  | PoultryMeat          | 2013 | kg | 2.66   |  |
| Gambia  | Whey                 | 2013 | kg | 0      |  |
| Georgia | AquaticAnimalsOthers | 2013 | kg | 0      |  |
| Georgia | AquaticPlants        | 2013 | kg | 0      |  |
| Georgia | BovineMeat           | 2013 | kg | 6.04   |  |
| Georgia | ButterGhee           | 2013 | kg | 0.55   |  |
| Georgia | Cephalopods          | 2013 | kg | 0      |  |
| Georgia | Cheese               | 2013 | kg | 0.32   |  |
| Georgia | Cream                | 2013 | kg | 0.05   |  |
| Georgia | DemersalFish         | 2013 | kg | 0.42   |  |
| Georgia | Eggs                 | 2013 | kg | 6.12   |  |
| Georgia | FreshwaterFish       | 2013 | kg | 0.48   |  |
| Georgia | Honey                | 2013 | kg | 0.9    |  |
| Georgia | MarineFishOther      | 2013 | kg | 2.79   |  |
| Georgia | MilkWhole            | 2013 | kg | 144.04 |  |
| Georgia | Pigmeat              | 2013 | kg | 8.93   |  |
| Georgia | PoultryMeat          | 2013 | kg | 12.28  |  |
| Germany | AquaticAnimalsOthers | 2013 | kg | 0      |  |
| Germany | AquaticPlants        | 2013 | kg | 0      |  |
| Germany | BovineMeat           | 2013 | kg | 13.16  |  |
| Germany | ButterGhee           | 2013 | kg | 5.16   |  |
| Germany | Cephalopods          | 2013 | kg | 0.22   |  |
| Germany | Cheese               | 2013 | kg | 21.69  |  |
| Germany | Cream                | 2013 | kg | 6.32   |  |
| Germany | DemersalFish         | 2013 | kg | 4.09   |  |
| Germany | Eggs                 | 2013 | kg | 12.2   |  |
| Germany | FreshwaterFish       | 2013 | kg | 4.25   |  |
| Germany | Honey                | 2013 | kg | 1.04   |  |
| Germany | MarineFishOther      | 2013 | kg | 0.36   |  |
| Germany | MilkWhole            | 2013 | kg | 70.64  |  |
| Germany | Pigmeat              | 2013 | kg | 51.81  |  |
| Germany | PoultryMeat          | 2013 | kg | 17.75  |  |
| Ghana   | AquaticAnimalsOthers | 2013 | kg | 0      |  |

|           |                      |      |    |       |  |
|-----------|----------------------|------|----|-------|--|
| Ghana     | AquaticPlants        | 2013 | kg | 0     |  |
| Ghana     | BovineMeat           | 2013 | kg | 1.09  |  |
| Ghana     | ButterGhee           | 2013 | kg | 0.07  |  |
| Ghana     | Cephalopods          | 2013 | kg | 0.1   |  |
| Ghana     | Cheese               | 2013 | kg | 0.03  |  |
| Ghana     | Cream                | 2013 | kg | 0     |  |
| Ghana     | DemersalFish         | 2013 | kg | 1.48  |  |
| Ghana     | Eggs                 | 2013 | kg | 1.21  |  |
| Ghana     | FreshwaterFish       | 2013 | kg | 4.86  |  |
| Ghana     | Honey                | 2013 | kg | 0     |  |
| Ghana     | MarineFishOther      | 2013 | kg | 0.33  |  |
| Ghana     | MilkWhole            | 2013 | kg | 3.17  |  |
| Ghana     | Pigmeat              | 2013 | kg | 1.36  |  |
| Ghana     | PoultryMeat          | 2013 | kg | 8.63  |  |
| Ghana     | Whey                 | 2013 | kg | 2.27  |  |
| Greece    | AquaticAnimalsOthers | 2013 | kg | 0.01  |  |
| Greece    | AquaticPlants        | 2013 | kg | 0     |  |
| Greece    | BovineMeat           | 2013 | kg | 16.1  |  |
| Greece    | ButterGhee           | 2013 | kg | 1.05  |  |
| Greece    | Cephalopods          | 2013 | kg | 2.66  |  |
| Greece    | Cheese               | 2013 | kg | 25.47 |  |
| Greece    | Cream                | 2013 | kg | 2.47  |  |
| Greece    | DemersalFish         | 2013 | kg | 8.8   |  |
| Greece    | Eggs                 | 2013 | kg | 10.13 |  |
| Greece    | FreshwaterFish       | 2013 | kg | 2     |  |
| Greece    | Honey                | 2013 | kg | 1.55  |  |
| Greece    | MarineFishOther      | 2013 | kg | 0.43  |  |
| Greece    | MilkWhole            | 2013 | kg | 75.52 |  |
| Greece    | Pigmeat              | 2013 | kg | 28.31 |  |
| Greece    | PoultryMeat          | 2013 | kg | 15.74 |  |
| Grenada   | AquaticAnimalsOthers | 2013 | kg | 0.01  |  |
| Grenada   | AquaticPlants        | 2013 | kg | 0     |  |
| Grenada   | BovineMeat           | 2013 | kg | 3.46  |  |
| Grenada   | ButterGhee           | 2013 | kg | 0.28  |  |
| Grenada   | Cephalopods          | 2013 | kg | 0     |  |
| Grenada   | Cheese               | 2013 | kg | 3.73  |  |
| Grenada   | Cream                | 2013 | kg | 0.24  |  |
| Grenada   | DemersalFish         | 2013 | kg | 7.39  |  |
| Grenada   | Eggs                 | 2013 | kg | 10.34 |  |
| Grenada   | FreshwaterFish       | 2013 | kg | 0     |  |
| Grenada   | MarineFishOther      | 2013 | kg | 2.73  |  |
| Grenada   | MilkWhole            | 2013 | kg | 48.32 |  |
| Grenada   | Pigmeat              | 2013 | kg | 11.52 |  |
| Grenada   | PoultryMeat          | 2013 | kg | 43.51 |  |
| Guatemala | AquaticPlants        | 2013 | kg | 0     |  |
| Guatemala | BovineMeat           | 2013 | kg | 5.6   |  |
| Guatemala | ButterGhee           | 2013 | kg | 0.22  |  |
| Guatemala | Cephalopods          | 2013 | kg | 0.03  |  |
| Guatemala | Cheese               | 2013 | kg | 1.52  |  |
| Guatemala | Cream                | 2013 | kg | 0.4   |  |
| Guatemala | DemersalFish         | 2013 | kg | 0.02  |  |
| Guatemala | Eggs                 | 2013 | kg | 14.61 |  |
| Guatemala | FreshwaterFish       | 2013 | kg | 0.53  |  |
| Guatemala | Honey                | 2013 | kg | 0.04  |  |
| Guatemala | MarineFishOther      | 2013 | kg | 0.08  |  |
| Guatemala | MilkWhole            | 2013 | kg | 26.02 |  |

|               |                      |      |    |       |
|---------------|----------------------|------|----|-------|
| Guatemala     | Pigmeat              | 2013 | kg | 4.85  |
| Guatemala     | PoultryMeat          | 2013 | kg | 16.45 |
| Guinea        | AquaticPlants        | 2013 | kg | 0     |
| Guinea        | BovineMeat           | 2013 | kg | 6.26  |
| Guinea        | ButterGhee           | 2013 | kg | 0.05  |
| Guinea        | Cephalopods          | 2013 | kg | 0     |
| Guinea        | Cheese               | 2013 | kg | 0.01  |
| Guinea        | Cream                | 2013 | kg | 0     |
| Guinea        | DemersalFish         | 2013 | kg | 2.41  |
| Guinea        | Eggs                 | 2013 | kg | 1.95  |
| Guinea        | FreshwaterFish       | 2013 | kg | 1.51  |
| Guinea        | Honey                | 2013 | kg | 0.08  |
| Guinea        | MarineFishOther      | 2013 | kg | 1.27  |
| Guinea        | MilkWhole            | 2013 | kg | 19.58 |
| Guinea        | Pigmeat              | 2013 | kg | 0.16  |
| Guinea        | PoultryMeat          | 2013 | kg | 1.83  |
| Guinea        | Whey                 | 2013 | kg | 0.09  |
| Guinea-Bissau | BovineMeat           | 2013 | kg | 3.94  |
| Guinea-Bissau | ButterGhee           | 2013 | kg | 0     |
| Guinea-Bissau | Cephalopods          | 2013 | kg | 0.08  |
| Guinea-Bissau | Cheese               | 2013 | kg | 0.01  |
| Guinea-Bissau | DemersalFish         | 2013 | kg | 0.32  |
| Guinea-Bissau | Eggs                 | 2013 | kg | 0.69  |
| Guinea-Bissau | FreshwaterFish       | 2013 | kg | 0.09  |
| Guinea-Bissau | Honey                | 2013 | kg | 0.08  |
| Guinea-Bissau | MarineFishOther      | 2013 | kg | 0.41  |
| Guinea-Bissau | MilkWhole            | 2013 | kg | 19.63 |
| Guinea-Bissau | Pigmeat              | 2013 | kg | 9.08  |
| Guinea-Bissau | PoultryMeat          | 2013 | kg | 1.88  |
| Guyana        | BovineMeat           | 2013 | kg | 3.22  |
| Guyana        | ButterGhee           | 2013 | kg | 0.11  |
| Guyana        | Cheese               | 2013 | kg | 1.81  |
| Guyana        | Cream                | 2013 | kg | 0.05  |
| Guyana        | DemersalFish         | 2013 | kg | 1.69  |
| Guyana        | Eggs                 | 2013 | kg | 0.79  |
| Guyana        | FreshwaterFish       | 2013 | kg | 0.87  |
| Guyana        | Honey                | 2013 | kg | 0.13  |
| Guyana        | MarineFishOther      | 2013 | kg | 10.79 |
| Guyana        | MilkWhole            | 2013 | kg | 79.41 |
| Guyana        | Pigmeat              | 2013 | kg | 3.38  |
| Guyana        | PoultryMeat          | 2013 | kg | 35.99 |
| Guyana        | Whey                 | 2013 | kg | 0     |
| Haiti         | AquaticAnimalsOthers | 2013 | kg | 0     |
| Haiti         | AquaticPlants        | 2013 | kg | 0     |
| Haiti         | BovineMeat           | 2013 | kg | 4.6   |
| Haiti         | ButterGhee           | 2013 | kg | 0.01  |
| Haiti         | Cephalopods          | 2013 | kg | 0     |
| Haiti         | Cheese               | 2013 | kg | 0.28  |
| Haiti         | Cream                | 2013 | kg | 0.01  |
| Haiti         | DemersalFish         | 2013 | kg | 0.29  |
| Haiti         | Eggs                 | 2013 | kg | 0.51  |
| Haiti         | FreshwaterFish       | 2013 | kg | 0.48  |
| Haiti         | Honey                | 2013 | kg | 0.04  |
| Haiti         | MarineFishOther      | 2013 | kg | 1.55  |
| Haiti         | MilkWhole            | 2013 | kg | 16.42 |
| Haiti         | Pigmeat              | 2013 | kg | 4.28  |

|          |                      |      |    |       |  |
|----------|----------------------|------|----|-------|--|
| Haiti    | PoultryMeat          | 2013 | kg | 7.58  |  |
| Honduras | AquaticAnimalsOthers | 2013 | kg | 0     |  |
| Honduras | AquaticPlants        | 2013 | kg | 0     |  |
| Honduras | BovineMeat           | 2013 | kg | 7.19  |  |
| Honduras | ButterGhee           | 2013 | kg | 0.82  |  |
| Honduras | Cephalopods          | 2013 | kg | 0.01  |  |
| Honduras | Cheese               | 2013 | kg | 1.84  |  |
| Honduras | Cream                | 2013 | kg | 0.01  |  |
| Honduras | DemersalFish         | 2013 | kg | 0.01  |  |
| Honduras | Eggs                 | 2013 | kg | 5.19  |  |
| Honduras | FreshwaterFish       | 2013 | kg | 1.25  |  |
| Honduras | Honey                | 2013 | kg | 0.03  |  |
| Honduras | MarineFishOther      | 2013 | kg | 0.48  |  |
| Honduras | MilkWhole            | 2013 | kg | 68.99 |  |
| Honduras | Pigmeat              | 2013 | kg | 6.48  |  |
| Honduras | PoultryMeat          | 2013 | kg | 20.29 |  |
| Honduras | Whey                 | 2013 | kg | 0.01  |  |
| Hungary  | AquaticAnimalsOthers | 2013 | kg | 0.02  |  |
| Hungary  | AquaticPlants        | 2013 | kg | 0     |  |
| Hungary  | BovineMeat           | 2013 | kg | 4.96  |  |
| Hungary  | ButterGhee           | 2013 | kg | 0.81  |  |
| Hungary  | Cephalopods          | 2013 | kg | 0.02  |  |
| Hungary  | Cheese               | 2013 | kg | 10.78 |  |
| Hungary  | Cream                | 2013 | kg | 6.57  |  |
| Hungary  | DemersalFish         | 2013 | kg | 0.99  |  |
| Hungary  | Eggs                 | 2013 | kg | 12.45 |  |
| Hungary  | FreshwaterFish       | 2013 | kg | 2.69  |  |
| Hungary  | Honey                | 2013 | kg | 0.02  |  |
| Hungary  | MarineFishOther      | 2013 | kg | 0.21  |  |
| Hungary  | MilkWhole            | 2013 | kg | 63.79 |  |
| Hungary  | Pigmeat              | 2013 | kg | 34.93 |  |
| Hungary  | PoultryMeat          | 2013 | kg | 23.78 |  |
| Iceland  | AquaticAnimalsOthers | 2013 | kg | 0.05  |  |
| Iceland  | AquaticPlants        | 2013 | kg | 0     |  |
| Iceland  | BovineMeat           | 2013 | kg | 13.36 |  |
| Iceland  | ButterGhee           | 2013 | kg | 6.14  |  |
| Iceland  | Cephalopods          | 2013 | kg | 0     |  |
| Iceland  | Cheese               | 2013 | kg | 30.82 |  |
| Iceland  | Cream                | 2013 | kg | 7.75  |  |
| Iceland  | DemersalFish         | 2013 | kg | 25.81 |  |
| Iceland  | Eggs                 | 2013 | kg | 8.24  |  |
| Iceland  | FreshwaterFish       | 2013 | kg | 4.91  |  |
| Iceland  | Honey                | 2013 | kg | 0.34  |  |
| Iceland  | MarineFishOther      | 2013 | kg | 0     |  |
| Iceland  | MilkWhole            | 2013 | kg | 54    |  |
| Iceland  | Pigmeat              | 2013 | kg | 21.69 |  |
| Iceland  | PoultryMeat          | 2013 | kg | 26.87 |  |
| India    | AquaticAnimalsOthers | 2013 | kg | 0     |  |
| India    | AquaticPlants        | 2013 | kg | 0     |  |
| India    | BovineMeat           | 2013 | kg | 0.81  |  |
| India    | ButterGhee           | 2013 | kg | 3.03  |  |
| India    | Cephalopods          | 2013 | kg | 0     |  |
| India    | Cheese               | 2013 | kg | 0     |  |
| India    | Cream                | 2013 | kg | 0     |  |
| India    | DemersalFish         | 2013 | kg | 0.3   |  |
| India    | Eggs                 | 2013 | kg | 2.58  |  |

|           |                      |      |    |       |  |
|-----------|----------------------|------|----|-------|--|
| India     | FreshwaterFish       | 2013 | kg | 3.48  |  |
| India     | Honey                | 2013 | kg | 0.02  |  |
| India     | MarineFishOther      | 2013 | kg | 0.39  |  |
| India     | MilkWhole            | 2013 | kg | 52.81 |  |
| India     | Pigmeat              | 2013 | kg | 0.28  |  |
| India     | PoultryMeat          | 2013 | kg | 1.88  |  |
| India     | Whey                 | 2013 | kg | 0     |  |
| Indonesia | AquaticAnimalsOthers | 2013 | kg | 0     |  |
| Indonesia | AquaticPlants        | 2013 | kg | 0     |  |
| Indonesia | BovineMeat           | 2013 | kg | 2.59  |  |
| Indonesia | ButterGhee           | 2013 | kg | 0.09  |  |
| Indonesia | Cephalopods          | 2013 | kg | 0.47  |  |
| Indonesia | Cheese               | 2013 | kg | 0.08  |  |
| Indonesia | Cream                | 2013 | kg | 0.06  |  |
| Indonesia | DemersalFish         | 2013 | kg | 4.51  |  |
| Indonesia | Eggs                 | 2013 | kg | 4.88  |  |
| Indonesia | FreshwaterFish       | 2013 | kg | 9.01  |  |
| Indonesia | Honey                | 2013 | kg | 0.01  |  |
| Indonesia | MarineFishOther      | 2013 | kg | 0.54  |  |
| Indonesia | MilkWhole            | 2013 | kg | 6     |  |
| Indonesia | Pigmeat              | 2013 | kg | 2.98  |  |
| Indonesia | PoultryMeat          | 2013 | kg | 7.5   |  |
| Iran      | AquaticAnimalsOthers | 2013 | kg | 0     |  |
| Iran      | AquaticPlants        | 2013 | kg | 0     |  |
| Iran      | BovineMeat           | 2013 | kg | 3.58  |  |
| Iran      | ButterGhee           | 2013 | kg | 2.66  |  |
| Iran      | Cephalopods          | 2013 | kg | 0.03  |  |
| Iran      | Cheese               | 2013 | kg | 2.76  |  |
| Iran      | Cream                | 2013 | kg | 0.01  |  |
| Iran      | DemersalFish         | 2013 | kg | 0.96  |  |
| Iran      | Eggs                 | 2013 | kg | 7.7   |  |
| Iran      | FreshwaterFish       | 2013 | kg | 5.03  |  |
| Iran      | Honey                | 2013 | kg | 0.96  |  |
| Iran      | MarineFishOther      | 2013 | kg | 0.33  |  |
| Iran      | MilkWhole            | 2013 | kg | 17.69 |  |
| Iran      | Pigmeat              | 2013 | kg | 0     |  |
| Iran      | PoultryMeat          | 2013 | kg | 25.38 |  |
| Iraq      | AquaticAnimalsOthers | 2013 | kg | 0     |  |
| Iraq      | AquaticPlants        | 2013 | kg | 0     |  |
| Iraq      | BovineMeat           | 2013 | kg | 2.96  |  |
| Iraq      | ButterGhee           | 2013 | kg | 0.18  |  |
| Iraq      | Cephalopods          | 2013 | kg | 0     |  |
| Iraq      | Cheese               | 2013 | kg | 1.06  |  |
| Iraq      | DemersalFish         | 2013 | kg | 0.83  |  |
| Iraq      | Eggs                 | 2013 | kg | 9.83  |  |
| Iraq      | FreshwaterFish       | 2013 | kg | 2.23  |  |
| Iraq      | Honey                | 2013 | kg | 0.02  |  |
| Iraq      | MarineFishOther      | 2013 | kg | 0.06  |  |
| Iraq      | MilkWhole            | 2013 | kg | 10.59 |  |
| Iraq      | Pigmeat              | 2013 | kg | 0     |  |
| Iraq      | PoultryMeat          | 2013 | kg | 14.83 |  |
| Ireland   | AquaticAnimalsOthers | 2013 | kg | 0.02  |  |
| Ireland   | AquaticPlants        | 2013 | kg | 0     |  |
| Ireland   | BovineMeat           | 2013 | kg | 22.35 |  |
| Ireland   | ButterGhee           | 2013 | kg | 3.03  |  |
| Ireland   | Cephalopods          | 2013 | kg | 0.05  |  |

|         |                      |      |    |       |  |
|---------|----------------------|------|----|-------|--|
| Ireland | Cheese               | 2013 | kg | 13.17 |  |
| Ireland | Cream                | 2013 | kg | 5.3   |  |
| Ireland | DemersalFish         | 2013 | kg | 10.35 |  |
| Ireland | Eggs                 | 2013 | kg | 8.96  |  |
| Ireland | FreshwaterFish       | 2013 | kg | 1.15  |  |
| Ireland | Honey                | 2013 | kg | 0.73  |  |
| Ireland | MarineFishOther      | 2013 | kg | 0.04  |  |
| Ireland | MilkWhole            | 2013 | kg | 91.94 |  |
| Ireland | Pigmeat              | 2013 | kg | 32.4  |  |
| Ireland | PoultryMeat          | 2013 | kg | 26.26 |  |
| Israel  | AquaticAnimalsOthers | 2013 | kg | 0.02  |  |
| Israel  | AquaticPlants        | 2013 | kg | 0     |  |
| Israel  | BovineMeat           | 2013 | kg | 28.78 |  |
| Israel  | ButterGhee           | 2013 | kg | 0.84  |  |
| Israel  | Cephalopods          | 2013 | kg | 0.18  |  |
| Israel  | Cheese               | 2013 | kg | 17.33 |  |
| Israel  | Cream                | 2013 | kg | 0     |  |
| Israel  | DemersalFish         | 2013 | kg | 5.45  |  |
| Israel  | Eggs                 | 2013 | kg | 11.35 |  |
| Israel  | FreshwaterFish       | 2013 | kg | 8.72  |  |
| Israel  | Honey                | 2013 | kg | 0.52  |  |
| Israel  | MarineFishOther      | 2013 | kg | 0.29  |  |
| Israel  | MilkWhole            | 2013 | kg | 89.5  |  |
| Israel  | Pigmeat              | 2013 | kg | 1.99  |  |
| Israel  | PoultryMeat          | 2013 | kg | 62.5  |  |
| Italy   | AquaticAnimalsOthers | 2013 | kg | 0.44  |  |
| Italy   | AquaticPlants        | 2013 | kg | 0     |  |
| Italy   | BovineMeat           | 2013 | kg | 18.6  |  |
| Italy   | ButterGhee           | 2013 | kg | 2.84  |  |
| Italy   | Cephalopods          | 2013 | kg | 3.01  |  |
| Italy   | Cheese               | 2013 | kg | 23.11 |  |
| Italy   | Cream                | 2013 | kg | 2.95  |  |
| Italy   | DemersalFish         | 2013 | kg | 7.03  |  |
| Italy   | Eggs                 | 2013 | kg | 13.34 |  |
| Italy   | FreshwaterFish       | 2013 | kg | 3.06  |  |
| Italy   | Honey                | 2013 | kg | 0.27  |  |
| Italy   | MarineFishOther      | 2013 | kg | 1.07  |  |
| Italy   | MilkWhole            | 2013 | kg | 29.78 |  |
| Italy   | Pigmeat              | 2013 | kg | 40.28 |  |
| Italy   | PoultryMeat          | 2013 | kg | 18.61 |  |
| Jamaica | AquaticAnimalsOthers | 2013 | kg | 0     |  |
| Jamaica | AquaticPlants        | 2013 | kg | 0     |  |
| Jamaica | BovineMeat           | 2013 | kg | 3.97  |  |
| Jamaica | ButterGhee           | 2013 | kg | 0.31  |  |
| Jamaica | Cephalopods          | 2013 | kg | 0.01  |  |
| Jamaica | Cheese               | 2013 | kg | 1.23  |  |
| Jamaica | Cream                | 2013 | kg | 0.07  |  |
| Jamaica | DemersalFish         | 2013 | kg | 0.05  |  |
| Jamaica | Eggs                 | 2013 | kg | 2.27  |  |
| Jamaica | FreshwaterFish       | 2013 | kg | 0.69  |  |
| Jamaica | Honey                | 2013 | kg | 0.28  |  |
| Jamaica | MarineFishOther      | 2013 | kg | 12.61 |  |
| Jamaica | MilkWhole            | 2013 | kg | 72.18 |  |
| Jamaica | Pigmeat              | 2013 | kg | 3.99  |  |
| Jamaica | PoultryMeat          | 2013 | kg | 52.51 |  |
| Japan   | AquaticAnimalsOthers | 2013 | kg | 0.26  |  |

|            |                      |      |    |        |  |
|------------|----------------------|------|----|--------|--|
| Japan      | AquaticPlants        | 2013 | kg | 0.92   |  |
| Japan      | BovineMeat           | 2013 | kg | 9.15   |  |
| Japan      | ButterGhee           | 2013 | kg | 0.57   |  |
| Japan      | Cephalopods          | 2013 | kg | 3.93   |  |
| Japan      | Cheese               | 2013 | kg | 2.89   |  |
| Japan      | Cream                | 2013 | kg | 0      |  |
| Japan      | DemersalFish         | 2013 | kg | 7.3    |  |
| Japan      | Eggs                 | 2013 | kg | 19.15  |  |
| Japan      | FreshwaterFish       | 2013 | kg | 5      |  |
| Japan      | Honey                | 2013 | kg | 0.33   |  |
| Japan      | MarineFishOther      | 2013 | kg | 5.75   |  |
| Japan      | MilkWhole            | 2013 | kg | 46.08  |  |
| Japan      | Pigmeat              | 2013 | kg | 20.62  |  |
| Japan      | PoultryMeat          | 2013 | kg | 19.42  |  |
| Jordan     | AquaticPlants        | 2013 | kg | 0      |  |
| Jordan     | BovineMeat           | 2013 | kg | 5.61   |  |
| Jordan     | ButterGhee           | 2013 | kg | 0.22   |  |
| Jordan     | Cephalopods          | 2013 | kg | 0.01   |  |
| Jordan     | Cheese               | 2013 | kg | 2.69   |  |
| Jordan     | Cream                | 2013 | kg | 0.46   |  |
| Jordan     | DemersalFish         | 2013 | kg | 0.29   |  |
| Jordan     | Eggs                 | 2013 | kg | 3.92   |  |
| Jordan     | FreshwaterFish       | 2013 | kg | 0.16   |  |
| Jordan     | Honey                | 2013 | kg | 0.13   |  |
| Jordan     | MarineFishOther      | 2013 | kg | 2.7    |  |
| Jordan     | MilkWhole            | 2013 | kg | 38.55  |  |
| Jordan     | Pigmeat              | 2013 | kg | 0.02   |  |
| Jordan     | PoultryMeat          | 2013 | kg | 33.39  |  |
| Kazakhstan | AquaticAnimalsOthers | 2013 | kg | 0.01   |  |
| Kazakhstan | AquaticPlants        | 2013 | kg | 0      |  |
| Kazakhstan | BovineMeat           | 2013 | kg | 23.38  |  |
| Kazakhstan | ButterGhee           | 2013 | kg | 1.37   |  |
| Kazakhstan | Cephalopods          | 2013 | kg | 0.02   |  |
| Kazakhstan | Cheese               | 2013 | kg | 2.63   |  |
| Kazakhstan | Cream                | 2013 | kg | 0.95   |  |
| Kazakhstan | DemersalFish         | 2013 | kg | 0.52   |  |
| Kazakhstan | Eggs                 | 2013 | kg | 8.29   |  |
| Kazakhstan | FreshwaterFish       | 2013 | kg | 1.74   |  |
| Kazakhstan | Honey                | 2013 | kg | 0.12   |  |
| Kazakhstan | MarineFishOther      | 2013 | kg | 0.5    |  |
| Kazakhstan | MilkWhole            | 2013 | kg | 258.44 |  |
| Kazakhstan | Pigmeat              | 2013 | kg | 10.36  |  |
| Kazakhstan | PoultryMeat          | 2013 | kg | 18.38  |  |
| Kenya      | AquaticAnimalsOthers | 2013 | kg | 0      |  |
| Kenya      | AquaticPlants        | 2013 | kg | 0      |  |
| Kenya      | BovineMeat           | 2013 | kg | 9.54   |  |
| Kenya      | ButterGhee           | 2013 | kg | 0.35   |  |
| Kenya      | Cephalopods          | 2013 | kg | 0      |  |
| Kenya      | Cheese               | 2013 | kg | 0.01   |  |
| Kenya      | Cream                | 2013 | kg | 0.34   |  |
| Kenya      | DemersalFish         | 2013 | kg | 0.08   |  |
| Kenya      | Eggs                 | 2013 | kg | 1.84   |  |
| Kenya      | FreshwaterFish       | 2013 | kg | 4.12   |  |
| Kenya      | Honey                | 2013 | kg | 0.27   |  |
| Kenya      | MarineFishOther      | 2013 | kg | 0.04   |  |
| Kenya      | MilkWhole            | 2013 | kg | 89.66  |  |

|            |                      |      |    |        |  |
|------------|----------------------|------|----|--------|--|
| Kenya      | Pigmeat              | 2013 | kg | 0.29   |  |
| Kenya      | PoultryMeat          | 2013 | kg | 0.47   |  |
| Kenya      | Whey                 | 2013 | kg | 0      |  |
| Kiribati   | AquaticAnimalsOthers | 2013 | kg | 0.47   |  |
| Kiribati   | AquaticPlants        | 2013 | kg | 0      |  |
| Kiribati   | BovineMeat           | 2013 | kg | 3.92   |  |
| Kiribati   | ButterGhee           | 2013 | kg | 0.28   |  |
| Kiribati   | Cephalopods          | 2013 | kg | 0      |  |
| Kiribati   | Cheese               | 2013 | kg | 0.02   |  |
| Kiribati   | Cream                | 2013 | kg | 0      |  |
| Kiribati   | DemersalFish         | 2013 | kg | 17.69  |  |
| Kiribati   | Eggs                 | 2013 | kg | 2.78   |  |
| Kiribati   | FreshwaterFish       | 2013 | kg | 0.03   |  |
| Kiribati   | Honey                | 2013 | kg | 0.01   |  |
| Kiribati   | MarineFishOther      | 2013 | kg | 0.74   |  |
| Kiribati   | MilkWhole            | 2013 | kg | 1.06   |  |
| Kiribati   | Pigmeat              | 2013 | kg | 11.89  |  |
| Kiribati   | PoultryMeat          | 2013 | kg | 15.89  |  |
| Kiribati   | Whey                 | 2013 | kg | 1.19   |  |
| Kuwait     | AquaticAnimalsOthers | 2013 | kg | 0.03   |  |
| Kuwait     | AquaticPlants        | 2013 | kg | 0      |  |
| Kuwait     | BovineMeat           | 2013 | kg | 13.03  |  |
| Kuwait     | ButterGhee           | 2013 | kg | 2.63   |  |
| Kuwait     | Cephalopods          | 2013 | kg | 0.03   |  |
| Kuwait     | Cheese               | 2013 | kg | 8.69   |  |
| Kuwait     | Cream                | 2013 | kg | 0.3    |  |
| Kuwait     | DemersalFish         | 2013 | kg | 2.99   |  |
| Kuwait     | Eggs                 | 2013 | kg | 12.6   |  |
| Kuwait     | FreshwaterFish       | 2013 | kg | 2.64   |  |
| Kuwait     | Honey                | 2013 | kg | 0.37   |  |
| Kuwait     | MarineFishOther      | 2013 | kg | 1.76   |  |
| Kuwait     | MilkWhole            | 2013 | kg | 43.16  |  |
| Kuwait     | PoultryMeat          | 2013 | kg | 53.61  |  |
| Kyrgyzstan | AquaticPlants        | 2013 | kg | 0      |  |
| Kyrgyzstan | BovineMeat           | 2013 | kg | 14.9   |  |
| Kyrgyzstan | ButterGhee           | 2013 | kg | 0.27   |  |
| Kyrgyzstan | Cephalopods          | 2013 | kg | 0      |  |
| Kyrgyzstan | Cheese               | 2013 | kg | 0.74   |  |
| Kyrgyzstan | Cream                | 2013 | kg | 0.13   |  |
| Kyrgyzstan | DemersalFish         | 2013 | kg | 0.06   |  |
| Kyrgyzstan | Eggs                 | 2013 | kg | 4.64   |  |
| Kyrgyzstan | FreshwaterFish       | 2013 | kg | 0.13   |  |
| Kyrgyzstan | Honey                | 2013 | kg | 0.26   |  |
| Kyrgyzstan | MarineFishOther      | 2013 | kg | 0.51   |  |
| Kyrgyzstan | MilkWhole            | 2013 | kg | 202.86 |  |
| Kyrgyzstan | Pigmeat              | 2013 | kg | 4.52   |  |
| Kyrgyzstan | PoultryMeat          | 2013 | kg | 2.31   |  |
| Lao        | AquaticAnimalsOthers | 2013 | kg | 0      |  |
| Lao        | AquaticPlants        | 2013 | kg | 0      |  |
| Lao        | BovineMeat           | 2013 | kg | 7.29   |  |
| Lao        | ButterGhee           | 2013 | kg | 0.04   |  |
| Lao        | Cephalopods          | 2013 | kg | 0      |  |
| Lao        | Cheese               | 2013 | kg | 0.01   |  |
| Lao        | DemersalFish         | 2013 | kg | 0      |  |
| Lao        | Eggs                 | 2013 | kg | 2.04   |  |
| Lao        | FreshwaterFish       | 2013 | kg | 19.19  |  |



|         |                      |      |    |       |  |
|---------|----------------------|------|----|-------|--|
| Lao     | MarineFishOther      | 2013 | kg | 0.24  |  |
| Lao     | MilkWhole            | 2013 | kg | 2.53  |  |
| Lao     | Pigmeat              | 2013 | kg | 9.31  |  |
| Lao     | PoultryMeat          | 2013 | kg | 4.21  |  |
| Latvia  | AquaticAnimalsOthers | 2013 | kg | 0.01  |  |
| Latvia  | AquaticPlants        | 2013 | kg | 0     |  |
| Latvia  | BovineMeat           | 2013 | kg | 5.11  |  |
| Latvia  | ButterGhee           | 2013 | kg | 1.68  |  |
| Latvia  | Cephalopods          | 2013 | kg | 0.16  |  |
| Latvia  | Cheese               | 2013 | kg | 16.32 |  |
| Latvia  | Cream                | 2013 | kg | 18.45 |  |
| Latvia  | DemersalFish         | 2013 | kg | 2.59  |  |
| Latvia  | Eggs                 | 2013 | kg | 14.03 |  |
| Latvia  | FreshwaterFish       | 2013 | kg | 3.12  |  |
| Latvia  | Honey                | 2013 | kg | 0.87  |  |
| Latvia  | MarineFishOther      | 2013 | kg | 5.57  |  |
| Latvia  | MilkWhole            | 2013 | kg | 32.22 |  |
| Latvia  | Pigmeat              | 2013 | kg | 34.96 |  |
| Latvia  | PoultryMeat          | 2013 | kg | 20.53 |  |
| Latvia  | Whey                 | 2013 | kg | 0.46  |  |
| Lebanon | AquaticPlants        | 2013 | kg | 0     |  |
| Lebanon | BovineMeat           | 2013 | kg | 15.22 |  |
| Lebanon | ButterGhee           | 2013 | kg | 1.24  |  |
| Lebanon | Cephalopods          | 2013 | kg | 0.1   |  |
| Lebanon | Cheese               | 2013 | kg | 9.28  |  |
| Lebanon | Cream                | 2013 | kg | 0.65  |  |
| Lebanon | DemersalFish         | 2013 | kg | 0.48  |  |
| Lebanon | Eggs                 | 2013 | kg | 3.7   |  |
| Lebanon | FreshwaterFish       | 2013 | kg | 0.66  |  |
| Lebanon | Honey                | 2013 | kg | 0.37  |  |
| Lebanon | MarineFishOther      | 2013 | kg | 4.87  |  |
| Lebanon | MilkWhole            | 2013 | kg | 51.07 |  |
| Lebanon | Pigmeat              | 2013 | kg | 1.7   |  |
| Lebanon | PoultryMeat          | 2013 | kg | 20.37 |  |
| Lebanon | Whey                 | 2013 | kg | 1.5   |  |
| Lesotho | AquaticPlants        | 2013 | kg | 0     |  |
| Lesotho | BovineMeat           | 2013 | kg | 6.02  |  |
| Lesotho | ButterGhee           | 2013 | kg | 0.06  |  |
| Lesotho | Cephalopods          | 2013 | kg | 0     |  |
| Lesotho | Cheese               | 2013 | kg | 0.11  |  |
| Lesotho | DemersalFish         | 2013 | kg | 0     |  |
| Lesotho | Eggs                 | 2013 | kg | 1.06  |  |
| Lesotho | FreshwaterFish       | 2013 | kg | 0.19  |  |
| Lesotho | Honey                | 2013 | kg | 0.01  |  |
| Lesotho | MarineFishOther      | 2013 | kg | 0.18  |  |
| Lesotho | MilkWhole            | 2013 | kg | 19.86 |  |
| Lesotho | Pigmeat              | 2013 | kg | 2.14  |  |
| Lesotho | PoultryMeat          | 2013 | kg | 10.24 |  |
| Liberia | AquaticAnimalsOthers | 2013 | kg | 0     |  |
| Liberia | BovineMeat           | 2013 | kg | 0.78  |  |
| Liberia | ButterGhee           | 2013 | kg | 0.01  |  |
| Liberia | Cephalopods          | 2013 | kg | 0.01  |  |
| Liberia | Cheese               | 2013 | kg | 0.02  |  |
| Liberia | DemersalFish         | 2013 | kg | 0.85  |  |
| Liberia | Eggs                 | 2013 | kg | 2.05  |  |
| Liberia | FreshwaterFish       | 2013 | kg | 0.54  |  |

|            |                      |      |    |       |  |
|------------|----------------------|------|----|-------|--|
| Liberia    | Honey                | 2013 | kg | 0     |  |
| Liberia    | MarineFishOther      | 2013 | kg | 1.09  |  |
| Liberia    | MilkWhole            | 2013 | kg | 2.42  |  |
| Liberia    | Pigmeat              | 2013 | kg | 4.01  |  |
| Liberia    | PoultryMeat          | 2013 | kg | 8.91  |  |
| Liberia    | Whey                 | 2013 | kg | 0     |  |
| Lithuania  | AquaticAnimalsOthers | 2013 | kg | 0.24  |  |
| Lithuania  | AquaticPlants        | 2013 | kg | 0     |  |
| Lithuania  | BovineMeat           | 2013 | kg | 4.49  |  |
| Lithuania  | ButterGhee           | 2013 | kg | 2.51  |  |
| Lithuania  | Cephalopods          | 2013 | kg | 0.09  |  |
| Lithuania  | Cheese               | 2013 | kg | 15.1  |  |
| Lithuania  | Cream                | 2013 | kg | 5.15  |  |
| Lithuania  | DemersalFish         | 2013 | kg | 6.33  |  |
| Lithuania  | Eggs                 | 2013 | kg | 13.11 |  |
| Lithuania  | FreshwaterFish       | 2013 | kg | 4.36  |  |
| Lithuania  | Honey                | 2013 | kg | 0.68  |  |
| Lithuania  | MarineFishOther      | 2013 | kg | 0.01  |  |
| Lithuania  | MilkWhole            | 2013 | kg | 81.06 |  |
| Lithuania  | Pigmeat              | 2013 | kg | 45.67 |  |
| Lithuania  | PoultryMeat          | 2013 | kg | 26.84 |  |
| Luxembourg | AquaticAnimalsOthers | 2013 | kg | 0.14  |  |
| Luxembourg | AquaticPlants        | 2013 | kg | 0     |  |
| Luxembourg | BovineMeat           | 2013 | kg | 29.88 |  |
| Luxembourg | ButterGhee           | 2013 | kg | 2.01  |  |
| Luxembourg | Cephalopods          | 2013 | kg | 0.9   |  |
| Luxembourg | Cheese               | 2013 | kg | 14.86 |  |
| Luxembourg | Cream                | 2013 | kg | 2.93  |  |
| Luxembourg | DemersalFish         | 2013 | kg | 8.46  |  |
| Luxembourg | Eggs                 | 2013 | kg | 14.64 |  |
| Luxembourg | FreshwaterFish       | 2013 | kg | 7.43  |  |
| Luxembourg | Honey                | 2013 | kg | 0.48  |  |
| Luxembourg | MarineFishOther      | 2013 | kg | 2.52  |  |
| Luxembourg | MilkWhole            | 2013 | kg | 87.91 |  |
| Luxembourg | Pigmeat              | 2013 | kg | 43.58 |  |
| Luxembourg | PoultryMeat          | 2013 | kg | 21.37 |  |
| Madagascar | AquaticAnimalsOthers | 2013 | kg | 0.04  |  |
| Madagascar | AquaticPlants        | 2013 | kg | 0     |  |
| Madagascar | BovineMeat           | 2013 | kg | 7.51  |  |
| Madagascar | ButterGhee           | 2013 | kg | 0.01  |  |
| Madagascar | Cephalopods          | 2013 | kg | 0.02  |  |
| Madagascar | Cheese               | 2013 | kg | 0.02  |  |
| Madagascar | Cream                | 2013 | kg | 0     |  |
| Madagascar | DemersalFish         | 2013 | kg | 0.24  |  |
| Madagascar | Eggs                 | 2013 | kg | 0.71  |  |
| Madagascar | FreshwaterFish       | 2013 | kg | 1.49  |  |
| Madagascar | Honey                | 2013 | kg | 0.19  |  |
| Madagascar | MarineFishOther      | 2013 | kg | 1.32  |  |
| Madagascar | MilkWhole            | 2013 | kg | 24.24 |  |
| Madagascar | Pigmeat              | 2013 | kg | 2.56  |  |
| Madagascar | PoultryMeat          | 2013 | kg | 3.14  |  |
| Madagascar | Whey                 | 2013 | kg | 0.18  |  |
| Malawi     | AquaticPlants        | 2013 | kg | 0     |  |
| Malawi     | BovineMeat           | 2013 | kg | 2.35  |  |
| Malawi     | ButterGhee           | 2013 | kg | 0.01  |  |
| Malawi     | Cephalopods          | 2013 | kg | 0     |  |

|          |                      |      |    |       |  |
|----------|----------------------|------|----|-------|--|
| Malawi   | Cheese               | 2013 | kg | 0.01  |  |
| Malawi   | Cream                | 2013 | kg | 0     |  |
| Malawi   | DemersalFish         | 2013 | kg | 0     |  |
| Malawi   | Eggs                 | 2013 | kg | 1.08  |  |
| Malawi   | FreshwaterFish       | 2013 | kg | 7.09  |  |
| Malawi   | Honey                | 2013 | kg | 0     |  |
| Malawi   | MarineFishOther      | 2013 | kg | 0.22  |  |
| Malawi   | MilkWhole            | 2013 | kg | 7.34  |  |
| Malawi   | Pigmeat              | 2013 | kg | 5.45  |  |
| Malawi   | PoultryMeat          | 2013 | kg | 1.38  |  |
| Malawi   | Whey                 | 2013 | kg | 0     |  |
| Malaysia | AquaticAnimalsOthers | 2013 | kg | 0.27  |  |
| Malaysia | AquaticPlants        | 2013 | kg | 0     |  |
| Malaysia | BovineMeat           | 2013 | kg | 6.52  |  |
| Malaysia | ButterGhee           | 2013 | kg | 0.32  |  |
| Malaysia | Cephalopods          | 2013 | kg | 2.52  |  |
| Malaysia | Cheese               | 2013 | kg | 0.46  |  |
| Malaysia | Cream                | 2013 | kg | 0.02  |  |
| Malaysia | DemersalFish         | 2013 | kg | 12.1  |  |
| Malaysia | Eggs                 | 2013 | kg | 16.57 |  |
| Malaysia | FreshwaterFish       | 2013 | kg | 7.34  |  |
| Malaysia | Honey                | 2013 | kg | 0.04  |  |
| Malaysia | MarineFishOther      | 2013 | kg | 10.93 |  |
| Malaysia | MilkWhole            | 2013 | kg | 4.13  |  |
| Malaysia | Pigmeat              | 2013 | kg | 7.76  |  |
| Malaysia | PoultryMeat          | 2013 | kg | 41.01 |  |
| Malaysia | Whey                 | 2013 | kg | 0     |  |
| Maldives | AquaticAnimalsOthers | 2013 | kg | 0.1   |  |
| Maldives | AquaticPlants        | 2013 | kg | 0     |  |
| Maldives | BovineMeat           | 2013 | kg | 9.44  |  |
| Maldives | ButterGhee           | 2013 | kg | 2.06  |  |
| Maldives | Cephalopods          | 2013 | kg | 0.75  |  |
| Maldives | Cheese               | 2013 | kg | 1.42  |  |
| Maldives | Cream                | 2013 | kg | 0.23  |  |
| Maldives | DemersalFish         | 2013 | kg | 0.3   |  |
| Maldives | Eggs                 | 2013 | kg | 10.79 |  |
| Maldives | FreshwaterFish       | 2013 | kg | 0.73  |  |
| Maldives | Honey                | 2013 | kg | 0.34  |  |
| Maldives | MarineFishOther      | 2013 | kg | 15.34 |  |
| Maldives | MilkWhole            | 2013 | kg | 78.48 |  |
| Maldives | Pigmeat              | 2013 | kg | 1.22  |  |
| Maldives | PoultryMeat          | 2013 | kg | 18.47 |  |
| Maldives | Whey                 | 2013 | kg | 0     |  |
| Mali     | AquaticPlants        | 2013 | kg | 0     |  |
| Mali     | BovineMeat           | 2013 | kg | 9.96  |  |
| Mali     | ButterGhee           | 2013 | kg | 0.01  |  |
| Mali     | Cephalopods          | 2013 | kg | 0     |  |
| Mali     | Cheese               | 2013 | kg | 0.02  |  |
| Mali     | Cream                | 2013 | kg | 0     |  |
| Mali     | DemersalFish         | 2013 | kg | 0.09  |  |
| Mali     | Eggs                 | 2013 | kg | 0.91  |  |
| Mali     | FreshwaterFish       | 2013 | kg | 6.14  |  |
| Mali     | Honey                | 2013 | kg | 0.01  |  |
| Mali     | MarineFishOther      | 2013 | kg | 1.2   |  |
| Mali     | MilkWhole            | 2013 | kg | 98.14 |  |
| Mali     | Pigmeat              | 2013 | kg | 0.17  |  |

|            |                      |      |    |        |  |
|------------|----------------------|------|----|--------|--|
| Mali       | PoultryMeat          | 2013 | kg | 3.07   |  |
| Malta      | AquaticAnimalsOthers | 2013 | kg | 0.03   |  |
| Malta      | AquaticPlants        | 2013 | kg | 0      |  |
| Malta      | BovineMeat           | 2013 | kg | 19.22  |  |
| Malta      | ButterGhee           | 2013 | kg | 1.01   |  |
| Malta      | Cephalopods          | 2013 | kg | 1.17   |  |
| Malta      | Cheese               | 2013 | kg | 13.97  |  |
| Malta      | Cream                | 2013 | kg | 0.26   |  |
| Malta      | DemersalFish         | 2013 | kg | 3.34   |  |
| Malta      | Eggs                 | 2013 | kg | 11.64  |  |
| Malta      | FreshwaterFish       | 2013 | kg | 3.14   |  |
| Malta      | Honey                | 2013 | kg | 0.24   |  |
| Malta      | MarineFishOther      | 2013 | kg | 2.56   |  |
| Malta      | MilkWhole            | 2013 | kg | 85.07  |  |
| Malta      | Pigmeat              | 2013 | kg | 34.24  |  |
| Malta      | PoultryMeat          | 2013 | kg | 26.4   |  |
| Mauritania | AquaticAnimalsOthers | 2013 | kg | 0      |  |
| Mauritania | BovineMeat           | 2013 | kg | 6.52   |  |
| Mauritania | ButterGhee           | 2013 | kg | 0.44   |  |
| Mauritania | Cephalopods          | 2013 | kg | 0.02   |  |
| Mauritania | Cheese               | 2013 | kg | 1.76   |  |
| Mauritania | Cream                | 2013 | kg | 0.16   |  |
| Mauritania | DemersalFish         | 2013 | kg | 0.58   |  |
| Mauritania | Eggs                 | 2013 | kg | 2.13   |  |
| Mauritania | FreshwaterFish       | 2013 | kg | 3.86   |  |
| Mauritania | Honey                | 2013 | kg | 0      |  |
| Mauritania | MarineFishOther      | 2013 | kg | 1.03   |  |
| Mauritania | MilkWhole            | 2013 | kg | 137.84 |  |
| Mauritania | Pigmeat              | 2013 | kg | 0.02   |  |
| Mauritania | PoultryMeat          | 2013 | kg | 5.6    |  |
| Mauritania | Whey                 | 2013 | kg | 0.03   |  |
| Mauritius  | AquaticAnimalsOthers | 2013 | kg | 0.11   |  |
| Mauritius  | AquaticPlants        | 2013 | kg | 0      |  |
| Mauritius  | BovineMeat           | 2013 | kg | 5.99   |  |
| Mauritius  | ButterGhee           | 2013 | kg | 0.91   |  |
| Mauritius  | Cephalopods          | 2013 | kg | 1.32   |  |
| Mauritius  | Cheese               | 2013 | kg | 2.61   |  |
| Mauritius  | Cream                | 2013 | kg | 0.45   |  |
| Mauritius  | DemersalFish         | 2013 | kg | 3.73   |  |
| Mauritius  | Eggs                 | 2013 | kg | 6.32   |  |
| Mauritius  | FreshwaterFish       | 2013 | kg | 0.76   |  |
| Mauritius  | Honey                | 2013 | kg | 0.17   |  |
| Mauritius  | MarineFishOther      | 2013 | kg | 3.3    |  |
| Mauritius  | MilkWhole            | 2013 | kg | 38.44  |  |
| Mauritius  | Pigmeat              | 2013 | kg | 4.08   |  |
| Mauritius  | PoultryMeat          | 2013 | kg | 38.51  |  |
| Mexico     | AquaticAnimalsOthers | 2013 | kg | 0.16   |  |
| Mexico     | AquaticPlants        | 2013 | kg | 0      |  |
| Mexico     | BovineMeat           | 2013 | kg | 15.33  |  |
| Mexico     | ButterGhee           | 2013 | kg | 0.46   |  |
| Mexico     | Cephalopods          | 2013 | kg | 0.32   |  |
| Mexico     | Cheese               | 2013 | kg | 2.13   |  |
| Mexico     | Cream                | 2013 | kg | 0.05   |  |
| Mexico     | DemersalFish         | 2013 | kg | 0.91   |  |
| Mexico     | Eggs                 | 2013 | kg | 18.34  |  |
| Mexico     | FreshwaterFish       | 2013 | kg | 1.23   |  |

|            |                      |      |    |        |  |
|------------|----------------------|------|----|--------|--|
| Mexico     | Honey                | 2013 | kg | 0.19   |  |
| Mexico     | MarineFishOther      | 2013 | kg | 1.77   |  |
| Mexico     | MilkWhole            | 2013 | kg | 74.68  |  |
| Mexico     | Pigmeat              | 2013 | kg | 15.23  |  |
| Mexico     | PoultryMeat          | 2013 | kg | 30.12  |  |
| Mongolia   | AquaticPlants        | 2013 | kg | 0      |  |
| Mongolia   | BovineMeat           | 2013 | kg | 19.95  |  |
| Mongolia   | ButterGhee           | 2013 | kg | 0.42   |  |
| Mongolia   | Cephalopods          | 2013 | kg | 0      |  |
| Mongolia   | Cheese               | 2013 | kg | 1.15   |  |
| Mongolia   | Cream                | 2013 | kg | 0      |  |
| Mongolia   | DemersalFish         | 2013 | kg | 0.07   |  |
| Mongolia   | Eggs                 | 2013 | kg | 2.23   |  |
| Mongolia   | FreshwaterFish       | 2013 | kg | 0      |  |
| Mongolia   | Honey                | 2013 | kg | 0.05   |  |
| Mongolia   | MarineFishOther      | 2013 | kg | 0.52   |  |
| Mongolia   | MilkWhole            | 2013 | kg | 125.66 |  |
| Mongolia   | Pigmeat              | 2013 | kg | 0.47   |  |
| Mongolia   | PoultryMeat          | 2013 | kg | 3.04   |  |
| Montenegro | AquaticAnimalsOthers | 2013 | kg | 0.06   |  |
| Montenegro | BovineMeat           | 2013 | kg | 12.59  |  |
| Montenegro | ButterGhee           | 2013 | kg | 2.2    |  |
| Montenegro | Cephalopods          | 2013 | kg | 0.89   |  |
| Montenegro | Cheese               | 2013 | kg | 17.24  |  |
| Montenegro | Cream                | 2013 | kg | 0      |  |
| Montenegro | DemersalFish         | 2013 | kg | 2.57   |  |
| Montenegro | Eggs                 | 2013 | kg | 11.6   |  |
| Montenegro | FreshwaterFish       | 2013 | kg | 3.06   |  |
| Montenegro | Honey                | 2013 | kg | 1.1    |  |
| Montenegro | MarineFishOther      | 2013 | kg | 0.94   |  |
| Montenegro | MilkWhole            | 2013 | kg | 173.9  |  |
| Montenegro | Pigmeat              | 2013 | kg | 53.04  |  |
| Montenegro | PoultryMeat          | 2013 | kg | 15.92  |  |
| Morocco    | AquaticAnimalsOthers | 2013 | kg | 0      |  |
| Morocco    | AquaticPlants        | 2013 | kg | 0      |  |
| Morocco    | BovineMeat           | 2013 | kg | 8.04   |  |
| Morocco    | ButterGhee           | 2013 | kg | 2.04   |  |
| Morocco    | Cephalopods          | 2013 | kg | 0.08   |  |
| Morocco    | Cheese               | 2013 | kg | 0.97   |  |
| Morocco    | Cream                | 2013 | kg | 0.02   |  |
| Morocco    | DemersalFish         | 2013 | kg | 1.82   |  |
| Morocco    | Eggs                 | 2013 | kg | 6.68   |  |
| Morocco    | FreshwaterFish       | 2013 | kg | 0.6    |  |
| Morocco    | Honey                | 2013 | kg | 0.21   |  |
| Morocco    | MarineFishOther      | 2013 | kg | 1.42   |  |
| Morocco    | MilkWhole            | 2013 | kg | 19.02  |  |
| Morocco    | Pigmeat              | 2013 | kg | 0.01   |  |
| Morocco    | PoultryMeat          | 2013 | kg | 20.77  |  |
| Mozambique | AquaticAnimalsOthers | 2013 | kg | 0      |  |
| Mozambique | AquaticPlants        | 2013 | kg | 0      |  |
| Mozambique | BovineMeat           | 2013 | kg | 1.04   |  |
| Mozambique | ButterGhee           | 2013 | kg | 0.01   |  |
| Mozambique | Cephalopods          | 2013 | kg | 0.04   |  |
| Mozambique | Cheese               | 2013 | kg | 0.03   |  |
| Mozambique | Cream                | 2013 | kg | 0.02   |  |
| Mozambique | DemersalFish         | 2013 | kg | 0.03   |  |

|             |                      |      |    |       |  |
|-------------|----------------------|------|----|-------|--|
| Mozambique  | Eggs                 | 2013 | kg | 1.7   |  |
| Mozambique  | FreshwaterFish       | 2013 | kg | 2.81  |  |
| Mozambique  | Honey                | 2013 | kg | 0.02  |  |
| Mozambique  | MarineFishOther      | 2013 | kg | 4.83  |  |
| Mozambique  | MilkWhole            | 2013 | kg | 3.98  |  |
| Mozambique  | Pigmeat              | 2013 | kg | 5.13  |  |
| Mozambique  | PoultryMeat          | 2013 | kg | 1.41  |  |
| Myanmar     | AquaticAnimalsOthers | 2013 | kg | 0.01  |  |
| Myanmar     | AquaticPlants        | 2013 | kg | 0     |  |
| Myanmar     | BovineMeat           | 2013 | kg | 4.94  |  |
| Myanmar     | ButterGhee           | 2013 | kg | 0.58  |  |
| Myanmar     | Cephalopods          | 2013 | kg | 0     |  |
| Myanmar     | Cheese               | 2013 | kg | 1.63  |  |
| Myanmar     | Cream                | 2013 | kg | 0     |  |
| Myanmar     | DemersalFish         | 2013 | kg | 0.01  |  |
| Myanmar     | Eggs                 | 2013 | kg | 6.45  |  |
| Myanmar     | FreshwaterFish       | 2013 | kg | 25.77 |  |
| Myanmar     | Honey                | 2013 | kg | 0.01  |  |
| Myanmar     | MarineFishOther      | 2013 | kg | 28.19 |  |
| Myanmar     | MilkWhole            | 2013 | kg | 17.04 |  |
| Myanmar     | Pigmeat              | 2013 | kg | 11.31 |  |
| Myanmar     | PoultryMeat          | 2013 | kg | 21.87 |  |
| Namibia     | AquaticAnimalsOthers | 2013 | kg | 0     |  |
| Namibia     | AquaticPlants        | 2013 | kg | 0     |  |
| Namibia     | BovineMeat           | 2013 | kg | 3.75  |  |
| Namibia     | ButterGhee           | 2013 | kg | 0.91  |  |
| Namibia     | Cephalopods          | 2013 | kg | 0.26  |  |
| Namibia     | Cheese               | 2013 | kg | 1.35  |  |
| Namibia     | Cream                | 2013 | kg | 0     |  |
| Namibia     | DemersalFish         | 2013 | kg | 5.24  |  |
| Namibia     | Eggs                 | 2013 | kg | 1.63  |  |
| Namibia     | FreshwaterFish       | 2013 | kg | 1.36  |  |
| Namibia     | Honey                | 2013 | kg | 0.02  |  |
| Namibia     | MarineFishOther      | 2013 | kg | 0.44  |  |
| Namibia     | MilkWhole            | 2013 | kg | 48.12 |  |
| Namibia     | Pigmeat              | 2013 | kg | 4.21  |  |
| Namibia     | PoultryMeat          | 2013 | kg | 12.19 |  |
| Namibia     | Whey                 | 2013 | kg | 0.05  |  |
| Nepal       | AquaticPlants        | 2013 | kg | 0     |  |
| Nepal       | BovineMeat           | 2013 | kg | 7.89  |  |
| Nepal       | ButterGhee           | 2013 | kg | 0.96  |  |
| Nepal       | Cephalopods          | 2013 | kg | 0     |  |
| Nepal       | Cheese               | 2013 | kg | 0.01  |  |
| Nepal       | DemersalFish         | 2013 | kg | 0.02  |  |
| Nepal       | Eggs                 | 2013 | kg | 1.42  |  |
| Nepal       | FreshwaterFish       | 2013 | kg | 1.89  |  |
| Nepal       | Honey                | 2013 | kg | 0.06  |  |
| Nepal       | MarineFishOther      | 2013 | kg | 0.25  |  |
| Nepal       | MilkWhole            | 2013 | kg | 40.69 |  |
| Nepal       | Pigmeat              | 2013 | kg | 0.67  |  |
| Nepal       | PoultryMeat          | 2013 | kg | 1.56  |  |
| Nepal       | Whey                 | 2013 | kg | 0.04  |  |
| Netherlands | AquaticAnimalsOthers | 2013 | kg | 0.21  |  |
| Netherlands | AquaticPlants        | 2013 | kg | 0     |  |
| Netherlands | BovineMeat           | 2013 | kg | 17.67 |  |
| Netherlands | ButterGhee           | 2013 | kg | 1.28  |  |

|              |                      |      |    |        |  |
|--------------|----------------------|------|----|--------|--|
| Netherlands  | Cephalopods          | 2013 | kg | 0.29   |  |
| Netherlands  | Cheese               | 2013 | kg | 17.69  |  |
| Netherlands  | Cream                | 2013 | kg | 0.05   |  |
| Netherlands  | DemersalFish         | 2013 | kg | 9.87   |  |
| Netherlands  | Eggs                 | 2013 | kg | 14.03  |  |
| Netherlands  | FreshwaterFish       | 2013 | kg | 2.93   |  |
| Netherlands  | Honey                | 2013 | kg | 0.59   |  |
| Netherlands  | MarineFishOther      | 2013 | kg | 0.01   |  |
| Netherlands  | MilkWhole            | 2013 | kg | 150.34 |  |
| Netherlands  | Pigmeat              | 2013 | kg | 36.36  |  |
| Netherlands  | PoultryMeat          | 2013 | kg | 23.9   |  |
| Netherlands  | Whey                 | 2013 | kg | 0      |  |
| NewCaledonia | AquaticAnimalsOthers | 2013 | kg | 0.61   |  |
| NewCaledonia | AquaticPlants        | 2013 | kg | 0      |  |
| NewCaledonia | BovineMeat           | 2013 | kg | 16.07  |  |
| NewCaledonia | ButterGhee           | 2013 | kg | 2.41   |  |
| NewCaledonia | Cephalopods          | 2013 | kg | 0.38   |  |
| NewCaledonia | Cheese               | 2013 | kg | 6.97   |  |
| NewCaledonia | Cream                | 2013 | kg | 9.14   |  |
| NewCaledonia | DemersalFish         | 2013 | kg | 0.66   |  |
| NewCaledonia | Eggs                 | 2013 | kg | 8.85   |  |
| NewCaledonia | FreshwaterFish       | 2013 | kg | 0.55   |  |
| NewCaledonia | Honey                | 2013 | kg | 0.42   |  |
| NewCaledonia | MarineFishOther      | 2013 | kg | 4.7    |  |
| NewCaledonia | MilkWhole            | 2013 | kg | 51.39  |  |
| NewCaledonia | Pigmeat              | 2013 | kg | 19.9   |  |
| NewCaledonia | PoultryMeat          | 2013 | kg | 44.36  |  |
| NewCaledonia | Whey                 | 2013 | kg | 1.27   |  |
| NewZealand   | AquaticAnimalsOthers | 2013 | kg | 0.23   |  |
| NewZealand   | AquaticPlants        | 2013 | kg | 0      |  |
| NewZealand   | BovineMeat           | 2013 | kg | 22.49  |  |
| NewZealand   | ButterGhee           | 2013 | kg | 9.25   |  |
| NewZealand   | Cephalopods          | 2013 | kg | 0.33   |  |
| NewZealand   | Cheese               | 2013 | kg | 8.69   |  |
| NewZealand   | Cream                | 2013 | kg | 0.19   |  |
| NewZealand   | DemersalFish         | 2013 | kg | 9.38   |  |
| NewZealand   | Eggs                 | 2013 | kg | 9.91   |  |
| NewZealand   | FreshwaterFish       | 2013 | kg | 2.08   |  |
| NewZealand   | Honey                | 2013 | kg | 2.02   |  |
| NewZealand   | MarineFishOther      | 2013 | kg | 0.01   |  |
| NewZealand   | MilkWhole            | 2013 | kg | 48.99  |  |
| NewZealand   | Pigmeat              | 2013 | kg | 22.29  |  |
| NewZealand   | PoultryMeat          | 2013 | kg | 34.98  |  |
| Nicaragua    | AquaticAnimalsOthers | 2013 | kg | 0.06   |  |
| Nicaragua    | AquaticPlants        | 2013 | kg | 0      |  |
| Nicaragua    | BovineMeat           | 2013 | kg | 4.73   |  |
| Nicaragua    | ButterGhee           | 2013 | kg | 0.14   |  |
| Nicaragua    | Cephalopods          | 2013 | kg | 0      |  |
| Nicaragua    | Cheese               | 2013 | kg | 3.03   |  |
| Nicaragua    | Cream                | 2013 | kg | 0      |  |
| Nicaragua    | DemersalFish         | 2013 | kg | 0.1    |  |
| Nicaragua    | Eggs                 | 2013 | kg | 4.9    |  |
| Nicaragua    | FreshwaterFish       | 2013 | kg | 0.16   |  |
| Nicaragua    | Honey                | 2013 | kg | 0.02   |  |
| Nicaragua    | MarineFishOther      | 2013 | kg | 0.1    |  |
| Nicaragua    | MilkWhole            | 2013 | kg | 59.25  |  |

|           |                      |      |    |       |  |
|-----------|----------------------|------|----|-------|--|
| Nicaragua | Pigmeat              | 2013 | kg | 3.38  |  |
| Nicaragua | PoultryMeat          | 2013 | kg | 21.31 |  |
| Nicaragua | Whey                 | 2013 | kg | 0     |  |
| Niger     | AquaticPlants        | 2013 | kg | 0     |  |
| Niger     | BovineMeat           | 2013 | kg | 8.97  |  |
| Niger     | ButterGhee           | 2013 | kg | 0.79  |  |
| Niger     | Cephalopods          | 2013 | kg | 0     |  |
| Niger     | Cheese               | 2013 | kg | 3.31  |  |
| Niger     | Cream                | 2013 | kg | 0     |  |
| Niger     | DemersalFish         | 2013 | kg | 0.01  |  |
| Niger     | Eggs                 | 2013 | kg | 0.3   |  |
| Niger     | FreshwaterFish       | 2013 | kg | 2.57  |  |
| Niger     | Honey                | 2013 | kg | 0     |  |
| Niger     | MarineFishOther      | 2013 | kg | 0.05  |  |
| Niger     | MilkWhole            | 2013 | kg | 21.93 |  |
| Niger     | Pigmeat              | 2013 | kg | 0.09  |  |
| Niger     | PoultryMeat          | 2013 | kg | 1.08  |  |
| Nigeria   | AquaticPlants        | 2013 | kg | 0     |  |
| Nigeria   | BovineMeat           | 2013 | kg | 2.33  |  |
| Nigeria   | ButterGhee           | 2013 | kg | 0.1   |  |
| Nigeria   | Cephalopods          | 2013 | kg | 0.01  |  |
| Nigeria   | Cheese               | 2013 | kg | 0.06  |  |
| Nigeria   | Cream                | 2013 | kg | 0     |  |
| Nigeria   | DemersalFish         | 2013 | kg | 7.22  |  |
| Nigeria   | Eggs                 | 2013 | kg | 3.46  |  |
| Nigeria   | FreshwaterFish       | 2013 | kg | 3.01  |  |
| Nigeria   | Honey                | 2013 | kg | 0     |  |
| Nigeria   | MarineFishOther      | 2013 | kg | 0.31  |  |
| Nigeria   | MilkWhole            | 2013 | kg | 5.1   |  |
| Nigeria   | Pigmeat              | 2013 | kg | 1.47  |  |
| Nigeria   | PoultryMeat          | 2013 | kg | 1.73  |  |
| Nigeria   | Whey                 | 2013 | kg | 0.55  |  |
| Norway    | AquaticAnimalsOthers | 2013 | kg | 0     |  |
| Norway    | AquaticPlants        | 2013 | kg | 0     |  |
| Norway    | BovineMeat           | 2013 | kg | 19.83 |  |
| Norway    | ButterGhee           | 2013 | kg | 3.17  |  |
| Norway    | Cephalopods          | 2013 | kg | 0.05  |  |
| Norway    | Cheese               | 2013 | kg | 14.59 |  |
| Norway    | Cream                | 2013 | kg | 7.14  |  |
| Norway    | DemersalFish         | 2013 | kg | 27.2  |  |
| Norway    | Eggs                 | 2013 | kg | 11.41 |  |
| Norway    | FreshwaterFish       | 2013 | kg | 6.08  |  |
| Norway    | Honey                | 2013 | kg | 0.39  |  |
| Norway    | MarineFishOther      | 2013 | kg | 0.05  |  |
| Norway    | MilkWhole            | 2013 | kg | 70.99 |  |
| Norway    | Pigmeat              | 2013 | kg | 23.51 |  |
| Norway    | PoultryMeat          | 2013 | kg | 21.01 |  |
| Oman      | AquaticPlants        | 2013 | kg | 0     |  |
| Oman      | BovineMeat           | 2013 | kg | 15.1  |  |
| Oman      | ButterGhee           | 2013 | kg | 0.54  |  |
| Oman      | Cephalopods          | 2013 | kg | 0.19  |  |
| Oman      | Cheese               | 2013 | kg | 4.36  |  |
| Oman      | Cream                | 2013 | kg | 0.08  |  |
| Oman      | DemersalFish         | 2013 | kg | 13.65 |  |
| Oman      | Eggs                 | 2013 | kg | 7.8   |  |
| Oman      | FreshwaterFish       | 2013 | kg | 0.18  |  |



|          |                      |      |    |        |  |
|----------|----------------------|------|----|--------|--|
| Oman     | Honey                | 2013 | kg | 0.47   |  |
| Oman     | MarineFishOther      | 2013 | kg | 2.14   |  |
| Oman     | MilkWhole            | 2013 | kg | 113.91 |  |
| Oman     | Pigmeat              | 2013 | kg | 0.01   |  |
| Oman     | PoultryMeat          | 2013 | kg | 31.51  |  |
| Pakistan | AquaticPlants        | 2013 | kg | 0      |  |
| Pakistan | BovineMeat           | 2013 | kg | 8.82   |  |
| Pakistan | ButterGhee           | 2013 | kg | 3.9    |  |
| Pakistan | Cephalopods          | 2013 | kg | 0.04   |  |
| Pakistan | Cheese               | 2013 | kg | 0.01   |  |
| Pakistan | Cream                | 2013 | kg | 0.02   |  |
| Pakistan | DemersalFish         | 2013 | kg | 0.19   |  |
| Pakistan | Eggs                 | 2013 | kg | 2.95   |  |
| Pakistan | FreshwaterFish       | 2013 | kg | 1.37   |  |
| Pakistan | Honey                | 2013 | kg | 0.02   |  |
| Pakistan | MarineFishOther      | 2013 | kg | 0      |  |
| Pakistan | MilkWhole            | 2013 | kg | 107.81 |  |
| Pakistan | Pigmeat              | 2013 | kg | 0      |  |
| Pakistan | PoultryMeat          | 2013 | kg | 5.01   |  |
| Panama   | AquaticAnimalsOthers | 2013 | kg | 0.01   |  |
| Panama   | AquaticPlants        | 2013 | kg | 0      |  |
| Panama   | BovineMeat           | 2013 | kg | 20.4   |  |
| Panama   | ButterGhee           | 2013 | kg | 0.55   |  |
| Panama   | Cephalopods          | 2013 | kg | 0.48   |  |
| Panama   | Cheese               | 2013 | kg | 5.92   |  |
| Panama   | Cream                | 2013 | kg | 0.05   |  |
| Panama   | DemersalFish         | 2013 | kg | 1.92   |  |
| Panama   | Eggs                 | 2013 | kg | 4.53   |  |
| Panama   | FreshwaterFish       | 2013 | kg | 0.72   |  |
| Panama   | Honey                | 2013 | kg | 0.03   |  |
| Panama   | MarineFishOther      | 2013 | kg | 0.92   |  |
| Panama   | MilkWhole            | 2013 | kg | 48.67  |  |
| Panama   | Pigmeat              | 2013 | kg | 13.48  |  |
| Panama   | PoultryMeat          | 2013 | kg | 30.81  |  |
| Paraguay | AquaticPlants        | 2013 | kg | 0      |  |
| Paraguay | BovineMeat           | 2013 | kg | 19.81  |  |
| Paraguay | ButterGhee           | 2013 | kg | 0.12   |  |
| Paraguay | Cephalopods          | 2013 | kg | 0      |  |
| Paraguay | Cheese               | 2013 | kg | 0.27   |  |
| Paraguay | Cream                | 2013 | kg | 0      |  |
| Paraguay | DemersalFish         | 2013 | kg | 0      |  |
| Paraguay | Eggs                 | 2013 | kg | 18.83  |  |
| Paraguay | FreshwaterFish       | 2013 | kg | 3.23   |  |
| Paraguay | Honey                | 2013 | kg | 0.26   |  |
| Paraguay | MarineFishOther      | 2013 | kg | 0.13   |  |
| Paraguay | MilkWhole            | 2013 | kg | 71.33  |  |
| Paraguay | Pigmeat              | 2013 | kg | 26.24  |  |
| Paraguay | PoultryMeat          | 2013 | kg | 6.39   |  |
| Peru     | AquaticAnimalsOthers | 2013 | kg | 0.02   |  |
| Peru     | AquaticPlants        | 2013 | kg | 0      |  |
| Peru     | BovineMeat           | 2013 | kg | 4.69   |  |
| Peru     | ButterGhee           | 2013 | kg | 0.16   |  |
| Peru     | Cephalopods          | 2013 | kg | 0.28   |  |
| Peru     | Cheese               | 2013 | kg | 0.85   |  |
| Peru     | Cream                | 2013 | kg | 0.03   |  |
| Peru     | DemersalFish         | 2013 | kg | 1.45   |  |

|             |                      |      |    |       |  |  |
|-------------|----------------------|------|----|-------|--|--|
| Peru        | Eggs                 | 2013 | kg | 8.76  |  |  |
| Peru        | FreshwaterFish       | 2013 | kg | 1.96  |  |  |
| Peru        | Honey                | 2013 | kg | 0.05  |  |  |
| Peru        | MarineFishOther      | 2013 | kg | 0.36  |  |  |
| Peru        | MeatAquaticMammals   | 2013 | kg | 0     |  |  |
| Peru        | MilkWhole            | 2013 | kg | 48.29 |  |  |
| Peru        | Pigmeat              | 2013 | kg | 3.85  |  |  |
| Peru        | PoultryMeat          | 2013 | kg | 11.72 |  |  |
| Peru        | Whey                 | 2013 | kg | 3.81  |  |  |
| Philippines | AquaticAnimalsOthers | 2013 | kg | 0.01  |  |  |
| Philippines | AquaticPlants        | 2013 | kg | 0     |  |  |
| Philippines | BovineMeat           | 2013 | kg | 4.06  |  |  |
| Philippines | ButterGhee           | 2013 | kg | 0.16  |  |  |
| Philippines | Cephalopods          | 2013 | kg | 0.68  |  |  |
| Philippines | Cheese               | 2013 | kg | 0.12  |  |  |
| Philippines | Cream                | 2013 | kg | 0.02  |  |  |
| Philippines | DemersalFish         | 2013 | kg | 4.24  |  |  |
| Philippines | Eggs                 | 2013 | kg | 4.02  |  |  |
| Philippines | FreshwaterFish       | 2013 | kg | 7.85  |  |  |
| Philippines | Honey                | 2013 | kg | 0     |  |  |
| Philippines | MarineFishOther      | 2013 | kg | 0.26  |  |  |
| Philippines | MilkWhole            | 2013 | kg | 2.8   |  |  |
| Philippines | Pigmeat              | 2013 | kg | 18.4  |  |  |
| Philippines | PoultryMeat          | 2013 | kg | 11.91 |  |  |
| Poland      | AquaticAnimalsOthers | 2013 | kg | 0     |  |  |
| Poland      | AquaticPlants        | 2013 | kg | 0     |  |  |
| Poland      | BovineMeat           | 2013 | kg | 2.32  |  |  |
| Poland      | ButterGhee           | 2013 | kg | 3.97  |  |  |
| Poland      | Cephalopods          | 2013 | kg | 0     |  |  |
| Poland      | Cheese               | 2013 | kg | 15.82 |  |  |
| Poland      | Cream                | 2013 | kg | 7.25  |  |  |
| Poland      | DemersalFish         | 2013 | kg | 4.13  |  |  |
| Poland      | Eggs                 | 2013 | kg | 7.53  |  |  |
| Poland      | FreshwaterFish       | 2013 | kg | 2     |  |  |
| Poland      | Honey                | 2013 | kg | 0.14  |  |  |
| Poland      | MarineFishOther      | 2013 | kg | 0     |  |  |
| Poland      | MilkWhole            | 2013 | kg | 37.92 |  |  |
| Poland      | Pigmeat              | 2013 | kg | 46.19 |  |  |
| Poland      | PoultryMeat          | 2013 | kg | 27.41 |  |  |
| Poland      | Whey                 | 2013 | kg | 0.03  |  |  |
| Portugal    | AquaticAnimalsOthers | 2013 | kg | 0.01  |  |  |
| Portugal    | AquaticPlants        | 2013 | kg | 0     |  |  |
| Portugal    | BovineMeat           | 2013 | kg | 16.45 |  |  |
| Portugal    | ButterGhee           | 2013 | kg | 2.21  |  |  |
| Portugal    | Cephalopods          | 2013 | kg | 2.23  |  |  |
| Portugal    | Cheese               | 2013 | kg | 9.36  |  |  |
| Portugal    | Cream                | 2013 | kg | 1.83  |  |  |
| Portugal    | DemersalFish         | 2013 | kg | 33.45 |  |  |
| Portugal    | Eggs                 | 2013 | kg | 9.05  |  |  |
| Portugal    | FreshwaterFish       | 2013 | kg | 3.19  |  |  |
| Portugal    | Honey                | 2013 | kg | 0.91  |  |  |
| Portugal    | MarineFishOther      | 2013 | kg | 1.62  |  |  |
| Portugal    | MilkWhole            | 2013 | kg | 47.05 |  |  |
| Portugal    | Pigmeat              | 2013 | kg | 37.91 |  |  |
| Portugal    | PoultryMeat          | 2013 | kg | 30.14 |  |  |
| S.Korea     | AquaticAnimalsOthers | 2013 | kg | 0.69  |  |  |

|         |                      |      |    |        |  |
|---------|----------------------|------|----|--------|--|
| S.Korea | AquaticPlants        | 2013 | kg | 22.41  |  |
| S.Korea | BovineMeat           | 2013 | kg | 14.53  |  |
| S.Korea | ButterGhee           | 2013 | kg | 1.3    |  |
| S.Korea | Cephalopods          | 2013 | kg | 6.7    |  |
| S.Korea | Cheese               | 2013 | kg | 1.69   |  |
| S.Korea | Cream                | 2013 | kg | 0.17   |  |
| S.Korea | DemersalFish         | 2013 | kg | 17.45  |  |
| S.Korea | Eggs                 | 2013 | kg | 11.24  |  |
| S.Korea | FreshwaterFish       | 2013 | kg | 1.34   |  |
| S.Korea | Honey                | 2013 | kg | 0.51   |  |
| S.Korea | MarineFishOther      | 2013 | kg | 0.45   |  |
| S.Korea | MilkWhole            | 2013 | kg | 7.3    |  |
| S.Korea | Pigmeat              | 2013 | kg | 32.76  |  |
| S.Korea | PoultryMeat          | 2013 | kg | 16     |  |
| Moldova | AquaticAnimalsOthers | 2013 | kg | 0      |  |
| Moldova | AquaticPlants        | 2013 | kg | 0      |  |
| Moldova | BovineMeat           | 2013 | kg | 1.56   |  |
| Moldova | ButterGhee           | 2013 | kg | 1.26   |  |
| Moldova | Cephalopods          | 2013 | kg | 0.03   |  |
| Moldova | Cheese               | 2013 | kg | 2.96   |  |
| Moldova | Cream                | 2013 | kg | 0.31   |  |
| Moldova | DemersalFish         | 2013 | kg | 1.95   |  |
| Moldova | Eggs                 | 2013 | kg | 9.79   |  |
| Moldova | FreshwaterFish       | 2013 | kg | 3.89   |  |
| Moldova | Honey                | 2013 | kg | 0.7    |  |
| Moldova | MarineFishOther      | 2013 | kg | 1.67   |  |
| Moldova | MilkWhole            | 2013 | kg | 110.05 |  |
| Moldova | Pigmeat              | 2013 | kg | 19.83  |  |
| Moldova | PoultryMeat          | 2013 | kg | 17.93  |  |
| Romania | AquaticAnimalsOthers | 2013 | kg | 0.01   |  |
| Romania | AquaticPlants        | 2013 | kg | 0      |  |
| Romania | BovineMeat           | 2013 | kg | 4.78   |  |
| Romania | ButterGhee           | 2013 | kg | 0.66   |  |
| Romania | Cephalopods          | 2013 | kg | 0.02   |  |
| Romania | Cheese               | 2013 | kg | 5.22   |  |
| Romania | Cream                | 2013 | kg | 0.08   |  |
| Romania | DemersalFish         | 2013 | kg | 0.65   |  |
| Romania | Eggs                 | 2013 | kg | 12.94  |  |
| Romania | FreshwaterFish       | 2013 | kg | 2.37   |  |
| Romania | Honey                | 2013 | kg | 0.78   |  |
| Romania | MarineFishOther      | 2013 | kg | 0.52   |  |
| Romania | MilkWhole            | 2013 | kg | 202.62 |  |
| Romania | Pigmeat              | 2013 | kg | 25.31  |  |
| Romania | PoultryMeat          | 2013 | kg | 15.38  |  |
| Russia  | AquaticAnimalsOthers | 2013 | kg | 0.01   |  |
| Russia  | AquaticPlants        | 2013 | kg | 0      |  |
| Russia  | BovineMeat           | 2013 | kg | 16.98  |  |
| Russia  | ButterGhee           | 2013 | kg | 2.58   |  |
| Russia  | Cephalopods          | 2013 | kg | 0.77   |  |
| Russia  | Cheese               | 2013 | kg | 7.13   |  |
| Russia  | Cream                | 2013 | kg | 2.52   |  |
| Russia  | DemersalFish         | 2013 | kg | 7.6    |  |
| Russia  | Eggs                 | 2013 | kg | 15.43  |  |
| Russia  | FreshwaterFish       | 2013 | kg | 6.86   |  |
| Russia  | Honey                | 2013 | kg | 0.48   |  |
| Russia  | MarineFishOther      | 2013 | kg | 0      |  |

|                              |                      |      |    |       |  |
|------------------------------|----------------------|------|----|-------|--|
| Russia                       | MilkWhole            | 2013 | kg | 101.5 |  |
| Russia                       | Pigmeat              | 2013 | kg | 25.66 |  |
| Russia                       | PoultryMeat          | 2013 | kg | 27.5  |  |
| Rwanda                       | BovineMeat           | 2013 | kg | 2.53  |  |
| Rwanda                       | ButterGhee           | 2013 | kg | 0.12  |  |
| Rwanda                       | Cephalopods          | 2013 | kg | 0     |  |
| Rwanda                       | Cheese               | 2013 | kg | 0     |  |
| Rwanda                       | Cream                | 2013 | kg | 0     |  |
| Rwanda                       | DemersalFish         | 2013 | kg | 0.02  |  |
| Rwanda                       | Eggs                 | 2013 | kg | 0.16  |  |
| Rwanda                       | FreshwaterFish       | 2013 | kg | 1.48  |  |
| Rwanda                       | Honey                | 2013 | kg | 0.04  |  |
| Rwanda                       | MarineFishOther      | 2013 | kg | 2.19  |  |
| Rwanda                       | MilkWhole            | 2013 | kg | 4.1   |  |
| Rwanda                       | Pigmeat              | 2013 | kg | 0.76  |  |
| Rwanda                       | PoultryMeat          | 2013 | kg | 1.34  |  |
| SaintKittsandNevis           | AquaticPlants        | 2013 | kg | 0     |  |
| SaintKittsandNevis           | BovineMeat           | 2013 | kg | 10.06 |  |
| SaintKittsandNevis           | ButterGhee           | 2013 | kg | 0.41  |  |
| SaintKittsandNevis           | Cephalopods          | 2013 | kg | 0.02  |  |
| SaintKittsandNevis           | Cheese               | 2013 | kg | 4.06  |  |
| SaintKittsandNevis           | Cream                | 2013 | kg | 0     |  |
| SaintKittsandNevis           | DemersalFish         | 2013 | kg | 4.33  |  |
| SaintKittsandNevis           | Eggs                 | 2013 | kg | 3.52  |  |
| SaintKittsandNevis           | FreshwaterFish       | 2013 | kg | 0.66  |  |
| SaintKittsandNevis           | MarineFishOther      | 2013 | kg | 17.26 |  |
| SaintKittsandNevis           | MilkWhole            | 2013 | kg | 37.51 |  |
| SaintKittsandNevis           | Pigmeat              | 2013 | kg | 6.36  |  |
| SaintKittsandNevis           | PoultryMeat          | 2013 | kg | 56.7  |  |
| SaintLucia                   | AquaticPlants        | 2013 | kg | 0     |  |
| SaintLucia                   | BovineMeat           | 2013 | kg | 6.02  |  |
| SaintLucia                   | ButterGhee           | 2013 | kg | 0.71  |  |
| SaintLucia                   | Cephalopods          | 2013 | kg | 0.15  |  |
| SaintLucia                   | Cheese               | 2013 | kg | 4.55  |  |
| SaintLucia                   | Cream                | 2013 | kg | 0.32  |  |
| SaintLucia                   | DemersalFish         | 2013 | kg | 1.62  |  |
| SaintLucia                   | Eggs                 | 2013 | kg | 3.2   |  |
| SaintLucia                   | FreshwaterFish       | 2013 | kg | 0.11  |  |
| SaintLucia                   | Honey                | 2013 | kg | 0     |  |
| SaintLucia                   | MarineFishOther      | 2013 | kg | 7.2   |  |
| SaintLucia                   | MilkWhole            | 2013 | kg | 47.8  |  |
| SaintLucia                   | Pigmeat              | 2013 | kg | 21.43 |  |
| SaintLucia                   | PoultryMeat          | 2013 | kg | 69.52 |  |
| SaintVincentandtheGrenadines | AquaticAnimalsOthers | 2013 | kg | 0     |  |
| SaintVincentandtheGrenadines | AquaticPlants        | 2013 | kg | 0     |  |
| SaintVincentandtheGrenadines | BovineMeat           | 2013 | kg | 9.37  |  |
| SaintVincentandtheGrenadines | ButterGhee           | 2013 | kg | 0.19  |  |
| SaintVincentandtheGrenadines | Cephalopods          | 2013 | kg | 0     |  |
| SaintVincentandtheGrenadines | Cheese               | 2013 | kg | 2.61  |  |
| SaintVincentandtheGrenadines | Cream                | 2013 | kg | 0.06  |  |
| SaintVincentandtheGrenadines | DemersalFish         | 2013 | kg | 2.22  |  |
| SaintVincentandtheGrenadines | Eggs                 | 2013 | kg | 5.32  |  |
| SaintVincentandtheGrenadines | FreshwaterFish       | 2013 | kg | 0.17  |  |
| SaintVincentandtheGrenadines | Honey                | 2013 | kg | 0     |  |
| SaintVincentandtheGrenadines | MarineFishOther      | 2013 | kg | 9.15  |  |
| SaintVincentandtheGrenadines | MilkWhole            | 2013 | kg | 47.22 |  |

|                              |                      |      |    |       |
|------------------------------|----------------------|------|----|-------|
| SaintVincentandtheGrenadines | Pigmeat              | 2013 | kg | 12.47 |
| SaintVincentandtheGrenadines | PoultryMeat          | 2013 | kg | 72.87 |
| Samoa                        | AquaticAnimalsOthers | 2013 | kg | 2.23  |
| Samoa                        | AquaticPlants        | 2013 | kg | 0     |
| Samoa                        | BovineMeat           | 2013 | kg | 10.38 |
| Samoa                        | ButterGhee           | 2013 | kg | 1.34  |
| Samoa                        | Cephalopods          | 2013 | kg | 0.26  |
| Samoa                        | Cheese               | 2013 | kg | 0.69  |
| Samoa                        | Cream                | 2013 | kg | 0.02  |
| Samoa                        | DemersalFish         | 2013 | kg | 0     |
| Samoa                        | Eggs                 | 2013 | kg | 2.31  |
| Samoa                        | FreshwaterFish       | 2013 | kg | 0.16  |
| Samoa                        | Honey                | 2013 | kg | 1.07  |
| Samoa                        | MarineFishOther      | 2013 | kg | 4.96  |
| Samoa                        | MilkWhole            | 2013 | kg | 29.86 |
| Samoa                        | Pigmeat              | 2013 | kg | 23.56 |
| Samoa                        | PoultryMeat          | 2013 | kg | 63.81 |
| SaoTomeandPrincipe           | BovineMeat           | 2013 | kg | 1.25  |
| SaoTomeandPrincipe           | ButterGhee           | 2013 | kg | 0.25  |
| SaoTomeandPrincipe           | Cephalopods          | 2013 | kg | 0     |
| SaoTomeandPrincipe           | Cheese               | 2013 | kg | 0.17  |
| SaoTomeandPrincipe           | Cream                | 2013 | kg | 0     |
| SaoTomeandPrincipe           | DemersalFish         | 2013 | kg | 5.74  |
| SaoTomeandPrincipe           | Eggs                 | 2013 | kg | 2.84  |
| SaoTomeandPrincipe           | FreshwaterFish       | 2013 | kg | 0.19  |
| SaoTomeandPrincipe           | MarineFishOther      | 2013 | kg | 3.23  |
| SaoTomeandPrincipe           | MilkWhole            | 2013 | kg | 11.93 |
| SaoTomeandPrincipe           | Pigmeat              | 2013 | kg | 5.55  |
| SaoTomeandPrincipe           | PoultryMeat          | 2013 | kg | 9.24  |
| SaoTomeandPrincipe           | Whey                 | 2013 | kg | 0.07  |
| SaudiArabia                  | AquaticAnimalsOthers | 2013 | kg | 0     |
| SaudiArabia                  | AquaticPlants        | 2013 | kg | 0     |
| SaudiArabia                  | BovineMeat           | 2013 | kg | 6.45  |
| SaudiArabia                  | ButterGhee           | 2013 | kg | 1.84  |
| SaudiArabia                  | Cephalopods          | 2013 | kg | 0.08  |
| SaudiArabia                  | Cheese               | 2013 | kg | 6.06  |
| SaudiArabia                  | Cream                | 2013 | kg | 2.39  |
| SaudiArabia                  | DemersalFish         | 2013 | kg | 1.36  |
| SaudiArabia                  | Eggs                 | 2013 | kg | 5.37  |
| SaudiArabia                  | FreshwaterFish       | 2013 | kg | 4.69  |
| SaudiArabia                  | Honey                | 2013 | kg | 0.44  |
| SaudiArabia                  | MarineFishOther      | 2013 | kg | 0.72  |
| SaudiArabia                  | MilkWhole            | 2013 | kg | 30.73 |
| SaudiArabia                  | PoultryMeat          | 2013 | kg | 49.05 |
| Senegal                      | AquaticPlants        | 2013 | kg | 0     |
| Senegal                      | BovineMeat           | 2013 | kg | 5.85  |
| Senegal                      | ButterGhee           | 2013 | kg | 0.11  |
| Senegal                      | Cephalopods          | 2013 | kg | 0.01  |
| Senegal                      | Cheese               | 2013 | kg | 0.14  |
| Senegal                      | Cream                | 2013 | kg | 0.03  |
| Senegal                      | DemersalFish         | 2013 | kg | 5.73  |
| Senegal                      | Eggs                 | 2013 | kg | 1.63  |
| Senegal                      | FreshwaterFish       | 2013 | kg | 2.44  |
| Senegal                      | Honey                | 2013 | kg | 0.22  |
| Senegal                      | MarineFishOther      | 2013 | kg | 0.28  |
| Senegal                      | MilkWhole            | 2013 | kg | 14.3  |

|             |                      |      |    |       |  |
|-------------|----------------------|------|----|-------|--|
| Senegal     | Pigmeat              | 2013 | kg | 0.94  |  |
| Senegal     | PoultryMeat          | 2013 | kg | 4.62  |  |
| Senegal     | Whey                 | 2013 | kg | 0.11  |  |
| Serbia      | AquaticAnimalsOthers | 2013 | kg | 0     |  |
| Serbia      | AquaticPlants        | 2013 | kg | 0     |  |
| Serbia      | BovineMeat           | 2013 | kg | 7.05  |  |
| Serbia      | ButterGhee           | 2013 | kg | 0.28  |  |
| Serbia      | Cephalopods          | 2013 | kg | 0.17  |  |
| Serbia      | Cheese               | 2013 | kg | 2.76  |  |
| Serbia      | Cream                | 2013 | kg | 0.12  |  |
| Serbia      | DemersalFish         | 2013 | kg | 1.03  |  |
| Serbia      | Eggs                 | 2013 | kg | 8.89  |  |
| Serbia      | FreshwaterFish       | 2013 | kg | 2.29  |  |
| Serbia      | Honey                | 2013 | kg | 0.55  |  |
| Serbia      | MarineFishOther      | 2013 | kg | 0.28  |  |
| Serbia      | MilkWhole            | 2013 | kg | 115.6 |  |
| Serbia      | Pigmeat              | 2013 | kg | 32.04 |  |
| Serbia      | PoultryMeat          | 2013 | kg | 10.64 |  |
| Serbia      | Whey                 | 2013 | kg | 0     |  |
| SierraLeone | AquaticPlants        | 2013 | kg | 0     |  |
| SierraLeone | BovineMeat           | 2013 | kg | 1.99  |  |
| SierraLeone | ButterGhee           | 2013 | kg | 0     |  |
| SierraLeone | Cephalopods          | 2013 | kg | 0.03  |  |
| SierraLeone | Cheese               | 2013 | kg | 0.07  |  |
| SierraLeone | Cream                | 2013 | kg | 0     |  |
| SierraLeone | DemersalFish         | 2013 | kg | 7.87  |  |
| SierraLeone | Eggs                 | 2013 | kg | 1.92  |  |
| SierraLeone | FreshwaterFish       | 2013 | kg | 3.54  |  |
| SierraLeone | Honey                | 2013 | kg | 0.14  |  |
| SierraLeone | MarineFishOther      | 2013 | kg | 1     |  |
| SierraLeone | MilkWhole            | 2013 | kg | 6.32  |  |
| SierraLeone | Pigmeat              | 2013 | kg | 1.22  |  |
| SierraLeone | PoultryMeat          | 2013 | kg | 4.97  |  |
| Slovakia    | AquaticAnimalsOthers | 2013 | kg | 0     |  |
| Slovakia    | AquaticPlants        | 2013 | kg | 0     |  |
| Slovakia    | BovineMeat           | 2013 | kg | 5.19  |  |
| Slovakia    | ButterGhee           | 2013 | kg | 2.65  |  |
| Slovakia    | Cephalopods          | 2013 | kg | 0.01  |  |
| Slovakia    | Cheese               | 2013 | kg | 11.27 |  |
| Slovakia    | Cream                | 2013 | kg | 1.41  |  |
| Slovakia    | DemersalFish         | 2013 | kg | 3.27  |  |
| Slovakia    | Eggs                 | 2013 | kg | 16.05 |  |
| Slovakia    | FreshwaterFish       | 2013 | kg | 1.95  |  |
| Slovakia    | Honey                | 2013 | kg | 1.1   |  |
| Slovakia    | MarineFishOther      | 2013 | kg | 0.35  |  |
| Slovakia    | MilkWhole            | 2013 | kg | 43.16 |  |
| Slovakia    | Pigmeat              | 2013 | kg | 31.78 |  |
| Slovakia    | PoultryMeat          | 2013 | kg | 15.13 |  |
| Slovenia    | AquaticAnimalsOthers | 2013 | kg | 0.07  |  |
| Slovenia    | AquaticPlants        | 2013 | kg | 0     |  |
| Slovenia    | BovineMeat           | 2013 | kg | 18.43 |  |
| Slovenia    | ButterGhee           | 2013 | kg | 2.65  |  |
| Slovenia    | Cephalopods          | 2013 | kg | 1.57  |  |
| Slovenia    | Cheese               | 2013 | kg | 13.99 |  |
| Slovenia    | Cream                | 2013 | kg | 8.47  |  |
| Slovenia    | DemersalFish         | 2013 | kg | 2.33  |  |

|                |                      |      |    |       |  |  |
|----------------|----------------------|------|----|-------|--|--|
| Slovenia       | Eggs                 | 2013 | kg | 9.36  |  |  |
| Slovenia       | FreshwaterFish       | 2013 | kg | 2.37  |  |  |
| Slovenia       | Honey                | 2013 | kg | 1.61  |  |  |
| Slovenia       | MarineFishOther      | 2013 | kg | 0.35  |  |  |
| Slovenia       | MilkWhole            | 2013 | kg | 32.06 |  |  |
| Slovenia       | Pigmeat              | 2013 | kg | 28.19 |  |  |
| Slovenia       | PoultryMeat          | 2013 | kg | 23.46 |  |  |
| SolomonIslands | AquaticAnimalsOthers | 2013 | kg | 0     |  |  |
| SolomonIslands | AquaticPlants        | 2013 | kg | 0     |  |  |
| SolomonIslands | BovineMeat           | 2013 | kg | 5.57  |  |  |
| SolomonIslands | ButterGhee           | 2013 | kg | 0.07  |  |  |
| SolomonIslands | Cephalopods          | 2013 | kg | 0     |  |  |
| SolomonIslands | Cheese               | 2013 | kg | 0.09  |  |  |
| SolomonIslands | Cream                | 2013 | kg | 0.02  |  |  |
| SolomonIslands | DemersalFish         | 2013 | kg | 0.02  |  |  |
| SolomonIslands | Eggs                 | 2013 | kg | 1.28  |  |  |
| SolomonIslands | FreshwaterFish       | 2013 | kg | 0     |  |  |
| SolomonIslands | MarineFishOther      | 2013 | kg | 19.01 |  |  |
| SolomonIslands | MilkWhole            | 2013 | kg | 6.24  |  |  |
| SolomonIslands | Pigmeat              | 2013 | kg | 4.7   |  |  |
| SolomonIslands | PoultryMeat          | 2013 | kg | 3.34  |  |  |
| SolomonIslands | Whey                 | 2013 | kg | 0.06  |  |  |
| SouthAfrica    | AquaticAnimalsOthers | 2013 | kg | 0     |  |  |
| SouthAfrica    | AquaticPlants        | 2013 | kg | 0     |  |  |
| SouthAfrica    | BovineMeat           | 2013 | kg | 18.03 |  |  |
| SouthAfrica    | ButterGhee           | 2013 | kg | 0.35  |  |  |
| SouthAfrica    | Cephalopods          | 2013 | kg | 0.12  |  |  |
| SouthAfrica    | Cheese               | 2013 | kg | 1.67  |  |  |
| SouthAfrica    | Cream                | 2013 | kg | 0.05  |  |  |
| SouthAfrica    | DemersalFish         | 2013 | kg | 2.16  |  |  |
| SouthAfrica    | Eggs                 | 2013 | kg | 7.21  |  |  |
| SouthAfrica    | FreshwaterFish       | 2013 | kg | 0.19  |  |  |
| SouthAfrica    | Honey                | 2013 | kg | 0.06  |  |  |
| SouthAfrica    | MarineFishOther      | 2013 | kg | 0.07  |  |  |
| SouthAfrica    | MilkWhole            | 2013 | kg | 36.32 |  |  |
| SouthAfrica    | Pigmeat              | 2013 | kg | 4.16  |  |  |
| SouthAfrica    | PoultryMeat          | 2013 | kg | 37.57 |  |  |
| SouthAfrica    | Whey                 | 2013 | kg | 0     |  |  |
| Spain          | AquaticAnimalsOthers | 2013 | kg | 0.06  |  |  |
| Spain          | AquaticPlants        | 2013 | kg | 0     |  |  |
| Spain          | BovineMeat           | 2013 | kg | 12.15 |  |  |
| Spain          | ButterGhee           | 2013 | kg | 0.74  |  |  |
| Spain          | Cephalopods          | 2013 | kg | 3.2   |  |  |
| Spain          | Cheese               | 2013 | kg | 8.93  |  |  |
| Spain          | Cream                | 2013 | kg | 1.89  |  |  |
| Spain          | DemersalFish         | 2013 | kg | 13.65 |  |  |
| Spain          | Eggs                 | 2013 | kg | 13.32 |  |  |
| Spain          | FreshwaterFish       | 2013 | kg | 3.86  |  |  |
| Spain          | Honey                | 2013 | kg | 0.66  |  |  |
| Spain          | MarineFishOther      | 2013 | kg | 0.91  |  |  |
| Spain          | MilkWhole            | 2013 | kg | 84.31 |  |  |
| Spain          | Pigmeat              | 2013 | kg | 48.92 |  |  |
| Spain          | PoultryMeat          | 2013 | kg | 28.63 |  |  |
| SriLanka       | AquaticAnimalsOthers | 2013 | kg | 0.18  |  |  |
| SriLanka       | AquaticPlants        | 2013 | kg | 0     |  |  |
| SriLanka       | BovineMeat           | 2013 | kg | 1.38  |  |  |

|          |                      |      |    |        |
|----------|----------------------|------|----|--------|
| SriLanka | ButterGhee           | 2013 | kg | 0.06   |
| SriLanka | Cephalopods          | 2013 | kg | 0.02   |
| SriLanka | Cheese               | 2013 | kg | 0.06   |
| SriLanka | Cream                | 2013 | kg | 0.01   |
| SriLanka | DemersalFish         | 2013 | kg | 1.73   |
| SriLanka | Eggs                 | 2013 | kg | 4.57   |
| SriLanka | FreshwaterFish       | 2013 | kg | 3.2    |
| SriLanka | Honey                | 2013 | kg | 0      |
| SriLanka | MarineFishOther      | 2013 | kg | 1.06   |
| SriLanka | MilkWhole            | 2013 | kg | 30.36  |
| SriLanka | Pigmeat              | 2013 | kg | 0.05   |
| SriLanka | PoultryMeat          | 2013 | kg | 4.96   |
| SriLanka | Whey                 | 2013 | kg | 0      |
| Sudan    | BovineMeat           | 2013 | kg | 10.78  |
| Sudan    | ButterGhee           | 2013 | kg | 0.26   |
| Sudan    | Cheese               | 2013 | kg | 2.85   |
| Sudan    | Cream                | 2013 | kg | 0      |
| Sudan    | DemersalFish         | 2013 | kg | 0      |
| Sudan    | Eggs                 | 2013 | kg | 0.99   |
| Sudan    | FreshwaterFish       | 2013 | kg | 0.82   |
| Sudan    | Honey                | 2013 | kg | 0.02   |
| Sudan    | MarineFishOther      | 2013 | kg | 0.13   |
| Sudan    | MilkWhole            | 2013 | kg | 132.86 |
| Sudan    | PoultryMeat          | 2013 | kg | 1.25   |
| Sudan    | Whey                 | 2013 | kg | 0.07   |
| Suriname | AquaticPlants        | 2013 | kg | 0      |
| Suriname | BovineMeat           | 2013 | kg | 9.73   |
| Suriname | ButterGhee           | 2013 | kg | 0.35   |
| Suriname | Cephalopods          | 2013 | kg | 0      |
| Suriname | Cheese               | 2013 | kg | 1.45   |
| Suriname | Cream                | 2013 | kg | 0.03   |
| Suriname | DemersalFish         | 2013 | kg | 0.02   |
| Suriname | Eggs                 | 2013 | kg | 3.93   |
| Suriname | FreshwaterFish       | 2013 | kg | 0.9    |
| Suriname | Honey                | 2013 | kg | 0.05   |
| Suriname | MarineFishOther      | 2013 | kg | 6.9    |
| Suriname | MilkWhole            | 2013 | kg | 25.53  |
| Suriname | Pigmeat              | 2013 | kg | 10.23  |
| Suriname | PoultryMeat          | 2013 | kg | 35.55  |
| Eswatini | AquaticPlants        | 2013 | kg | 0      |
| Eswatini | BovineMeat           | 2013 | kg | 15.1   |
| Eswatini | ButterGhee           | 2013 | kg | 0.22   |
| Eswatini | Cephalopods          | 2013 | kg | 0      |
| Eswatini | Cheese               | 2013 | kg | 1.28   |
| Eswatini | Cream                | 2013 | kg | 0.34   |
| Eswatini | DemersalFish         | 2013 | kg | 0      |
| Eswatini | Eggs                 | 2013 | kg | 1.5    |
| Eswatini | FreshwaterFish       | 2013 | kg | 0.47   |
| Eswatini | Honey                | 2013 | kg | 0      |
| Eswatini | MarineFishOther      | 2013 | kg | 0.31   |
| Eswatini | MilkWhole            | 2013 | kg | 47.99  |
| Eswatini | Pigmeat              | 2013 | kg | 2.43   |
| Eswatini | PoultryMeat          | 2013 | kg | 6.18   |
| Eswatini | Whey                 | 2013 | kg | 6.05   |
| Sweden   | AquaticAnimalsOthers | 2013 | kg | 0      |
| Sweden   | AquaticPlants        | 2013 | kg | 0      |



|             |                      |      |    |        |      |
|-------------|----------------------|------|----|--------|------|
| Sweden      | BovineMeat           | 2013 | kg | 24.58  |      |
| Sweden      | ButterGhee           | 2013 | kg | 4.35   |      |
| Sweden      | Cephalopods          | 2013 | kg | 0.08   |      |
| Sweden      | Cheese               | 2013 | kg | 19.82  |      |
| Sweden      | Cream                | 2013 | kg | 11.55  |      |
| Sweden      | DemersalFish         | 2013 | kg | 9.52   |      |
| Sweden      | Eggs                 | 2013 | kg | 13.37  |      |
| Sweden      | FreshwaterFish       | 2013 | kg | 8.97   |      |
| Sweden      | Honey                | 2013 | kg | 0.84   |      |
| Sweden      | MarineFishOther      | 2013 | kg | 0.66   |      |
| Sweden      | MilkWhole            | 2013 | kg | 52.64  |      |
| Sweden      | Pigmeat              | 2013 | kg | 37     |      |
| Sweden      | PoultryMeat          | 2013 | kg | 16.64  |      |
| Sweden      | Whey                 | 2013 | kg | 0.1    |      |
| Switzerland | AquaticAnimalsOthers | 2013 | kg |        | 0.04 |
| Switzerland | AquaticPlants        | 2013 | kg | 0      |      |
| Switzerland | BovineMeat           | 2013 | kg | 21.26  |      |
| Switzerland | ButterGhee           | 2013 | kg | 5.6    |      |
| Switzerland | Cephalopods          | 2013 | kg | 0.41   |      |
| Switzerland | Cheese               | 2013 | kg | 19.79  |      |
| Switzerland | Cream                | 2013 | kg | 4.94   |      |
| Switzerland | DemersalFish         | 2013 | kg | 2.76   |      |
| Switzerland | Eggs                 | 2013 | kg | 10.53  |      |
| Switzerland | FreshwaterFish       | 2013 | kg | 6.16   |      |
| Switzerland | Honey                | 2013 | kg | 1.41   |      |
| Switzerland | MarineFishOther      | 2013 | kg | 1.76   |      |
| Switzerland | MilkWhole            | 2013 | kg | 108.26 |      |
| Switzerland | Pigmeat              | 2013 | kg | 31.49  |      |
| Switzerland | PoultryMeat          | 2013 | kg | 16.38  |      |
| Tajikistan  | AquaticPlants        | 2013 | kg | 0      |      |
| Tajikistan  | BovineMeat           | 2013 | kg | 4.35   |      |
| Tajikistan  | ButterGhee           | 2013 | kg | 0.03   |      |
| Tajikistan  | Cephalopods          | 2013 | kg | 0      |      |
| Tajikistan  | Cheese               | 2013 | kg | 2.66   |      |
| Tajikistan  | DemersalFish         | 2013 | kg | 0.01   |      |
| Tajikistan  | Eggs                 | 2013 | kg | 1.71   |      |
| Tajikistan  | FreshwaterFish       | 2013 | kg | 0.17   |      |
| Tajikistan  | Honey                | 2013 | kg | 0.43   |      |
| Tajikistan  | MarineFishOther      | 2013 | kg | 0.11   |      |
| Tajikistan  | MilkWhole            | 2013 | kg | 45.27  |      |
| Tajikistan  | Pigmeat              | 2013 | kg | 1.07   |      |
| Tajikistan  | PoultryMeat          | 2013 | kg | 2.6    |      |
| Thailand    | AquaticAnimalsOthers | 2013 | kg |        | 1.28 |
| Thailand    | AquaticPlants        | 2013 | kg | 0      |      |
| Thailand    | BovineMeat           | 2013 | kg | 2.56   |      |
| Thailand    | ButterGhee           | 2013 | kg | 0.17   |      |
| Thailand    | Cephalopods          | 2013 | kg | 2.12   |      |
| Thailand    | Cheese               | 2013 | kg | 0.2    |      |
| Thailand    | Cream                | 2013 | kg | 0.02   |      |
| Thailand    | DemersalFish         | 2013 | kg | 1      |      |
| Thailand    | Eggs                 | 2013 | kg | 12.35  |      |
| Thailand    | FreshwaterFish       | 2013 | kg | 8.32   |      |
| Thailand    | Honey                | 2013 | kg | 0.06   |      |
| Thailand    | MarineFishOther      | 2013 | kg | 0.21   |      |
| Thailand    | MilkWhole            | 2013 | kg | 17.01  |      |
| Thailand    | Pigmeat              | 2013 | kg | 13     |      |

|                   |                      |      |    |       |  |
|-------------------|----------------------|------|----|-------|--|
| Thailand          | PoultryMeat          | 2013 | kg | 13.69 |  |
| Thailand          | Whey                 | 2013 | kg | 0.41  |  |
| NorthMacedonia    | AquaticAnimalsOthers | 2013 | kg | 0     |  |
| NorthMacedonia    | AquaticPlants        | 2013 | kg | 0     |  |
| NorthMacedonia    | BovineMeat           | 2013 | kg | 7.69  |  |
| NorthMacedonia    | ButterGhee           | 2013 | kg | 3.1   |  |
| NorthMacedonia    | Cephalopods          | 2013 | kg | 0.03  |  |
| NorthMacedonia    | Cheese               | 2013 | kg | 4.64  |  |
| NorthMacedonia    | Cream                | 2013 | kg | 0.06  |  |
| NorthMacedonia    | DemersalFish         | 2013 | kg | 1.79  |  |
| NorthMacedonia    | Eggs                 | 2013 | kg | 6.38  |  |
| NorthMacedonia    | FreshwaterFish       | 2013 | kg | 1.11  |  |
| NorthMacedonia    | Honey                | 2013 | kg | 0.42  |  |
| NorthMacedonia    | MarineFishOther      | 2013 | kg | 0.28  |  |
| NorthMacedonia    | MilkWhole            | 2013 | kg | 51.73 |  |
| NorthMacedonia    | Pigmeat              | 2013 | kg | 10.35 |  |
| NorthMacedonia    | PoultryMeat          | 2013 | kg | 18.77 |  |
| Timor-Leste       | AquaticAnimalsOthers | 2013 | kg | 0     |  |
| Timor-Leste       | AquaticPlants        | 2013 | kg | 0     |  |
| Timor-Leste       | BovineMeat           | 2013 | kg | 1.7   |  |
| Timor-Leste       | ButterGhee           | 2013 | kg | 0.04  |  |
| Timor-Leste       | Cephalopods          | 2013 | kg | 0.03  |  |
| Timor-Leste       | Cheese               | 2013 | kg | 0.03  |  |
| Timor-Leste       | DemersalFish         | 2013 | kg | 0.13  |  |
| Timor-Leste       | Eggs                 | 2013 | kg | 1.64  |  |
| Timor-Leste       | FreshwaterFish       | 2013 | kg | 0.07  |  |
| Timor-Leste       | Honey                | 2013 | kg | 0.41  |  |
| Timor-Leste       | MarineFishOther      | 2013 | kg | 3.28  |  |
| Timor-Leste       | MilkWhole            | 2013 | kg | 0.96  |  |
| Timor-Leste       | Pigmeat              | 2013 | kg | 11.78 |  |
| Timor-Leste       | PoultryMeat          | 2013 | kg | 5.66  |  |
| Togo              | AquaticAnimalsOthers | 2013 | kg | 0     |  |
| Togo              | BovineMeat           | 2013 | kg | 1.53  |  |
| Togo              | ButterGhee           | 2013 | kg | 0.01  |  |
| Togo              | Cephalopods          | 2013 | kg | 0     |  |
| Togo              | Cheese               | 2013 | kg | 0.03  |  |
| Togo              | Cream                | 2013 | kg | 0.02  |  |
| Togo              | DemersalFish         | 2013 | kg | 0.46  |  |
| Togo              | Eggs                 | 2013 | kg | 0.86  |  |
| Togo              | FreshwaterFish       | 2013 | kg | 1.31  |  |
| Togo              | Honey                | 2013 | kg | 0     |  |
| Togo              | MarineFishOther      | 2013 | kg | 7.4   |  |
| Togo              | MilkWhole            | 2013 | kg | 1.91  |  |
| Togo              | Pigmeat              | 2013 | kg | 1.57  |  |
| Togo              | PoultryMeat          | 2013 | kg | 6.63  |  |
| Togo              | Whey                 | 2013 | kg | 0.49  |  |
| TrinidadandTobago | AquaticPlants        | 2013 | kg | 0     |  |
| TrinidadandTobago | BovineMeat           | 2013 | kg | 6.13  |  |
| TrinidadandTobago | ButterGhee           | 2013 | kg | 0.73  |  |
| TrinidadandTobago | Cephalopods          | 2013 | kg | 0.54  |  |
| TrinidadandTobago | Cheese               | 2013 | kg | 5.81  |  |
| TrinidadandTobago | Cream                | 2013 | kg | 0.13  |  |
| TrinidadandTobago | DemersalFish         | 2013 | kg | 2.02  |  |
| TrinidadandTobago | Eggs                 | 2013 | kg | 4.2   |  |
| TrinidadandTobago | FreshwaterFish       | 2013 | kg | 0.44  |  |
| TrinidadandTobago | Honey                | 2013 | kg | 0.01  |  |

|                   |                      |      |    |        |
|-------------------|----------------------|------|----|--------|
| TrinidadandTobago | MarineFishOther      | 2013 | kg | 10.7   |
| TrinidadandTobago | MilkWhole            | 2013 | kg | 40.64  |
| TrinidadandTobago | Pigmeat              | 2013 | kg | 8.92   |
| TrinidadandTobago | PoultryMeat          | 2013 | kg | 58.27  |
| TrinidadandTobago | Whey                 | 2013 | kg | 7      |
| Tunisia           | AquaticAnimalsOthers | 2013 | kg | 0      |
| Tunisia           | AquaticPlants        | 2013 | kg | 0      |
| Tunisia           | BovineMeat           | 2013 | kg | 5.53   |
| Tunisia           | ButterGhee           | 2013 | kg | 0.64   |
| Tunisia           | Cephalopods          | 2013 | kg | 0.51   |
| Tunisia           | Cheese               | 2013 | kg | 0.88   |
| Tunisia           | Cream                | 2013 | kg | 0.95   |
| Tunisia           | DemersalFish         | 2013 | kg | 3.66   |
| Tunisia           | Eggs                 | 2013 | kg | 7.67   |
| Tunisia           | FreshwaterFish       | 2013 | kg | 0.2    |
| Tunisia           | Honey                | 2013 | kg | 0.3    |
| Tunisia           | MarineFishOther      | 2013 | kg | 0.56   |
| Tunisia           | MilkWhole            | 2013 | kg | 73.17  |
| Tunisia           | Pigmeat              | 2013 | kg | 0      |
| Tunisia           | PoultryMeat          | 2013 | kg | 18.5   |
| Tunisia           | Whey                 | 2013 | kg | 1.1    |
| Turkey            | AquaticAnimalsOthers | 2013 | kg | 0.01   |
| Turkey            | AquaticPlants        | 2013 | kg | 0      |
| Turkey            | BovineMeat           | 2013 | kg | 11.64  |
| Turkey            | ButterGhee           | 2013 | kg | 3.08   |
| Turkey            | Cephalopods          | 2013 | kg | 0.07   |
| Turkey            | Cheese               | 2013 | kg | 2.3    |
| Turkey            | Cream                | 2013 | kg | 0      |
| Turkey            | DemersalFish         | 2013 | kg | 1.04   |
| Turkey            | Eggs                 | 2013 | kg | 8.2    |
| Turkey            | FreshwaterFish       | 2013 | kg | 1.64   |
| Turkey            | Honey                | 2013 | kg | 1.22   |
| Turkey            | MarineFishOther      | 2013 | kg | 0      |
| Turkey            | MilkWhole            | 2013 | kg | 151.59 |
| Turkey            | Pigmeat              | 2013 | kg | 0.01   |
| Turkey            | PoultryMeat          | 2013 | kg | 18.78  |
| Turkmenistan      | AquaticAnimalsOthers | 2013 | kg | 0      |
| Turkmenistan      | AquaticPlants        | 2013 | kg | 0      |
| Turkmenistan      | BovineMeat           | 2013 | kg | 26.06  |
| Turkmenistan      | ButterGhee           | 2013 | kg | 0.69   |
| Turkmenistan      | Cephalopods          | 2013 | kg | 0      |
| Turkmenistan      | Cheese               | 2013 | kg | 0.57   |
| Turkmenistan      | DemersalFish         | 2013 | kg | 0.12   |
| Turkmenistan      | Eggs                 | 2013 | kg | 7.88   |
| Turkmenistan      | FreshwaterFish       | 2013 | kg | 2.89   |
| Turkmenistan      | Honey                | 2013 | kg | 0.15   |
| Turkmenistan      | MarineFishOther      | 2013 | kg | 0.05   |
| Turkmenistan      | MilkWhole            | 2013 | kg | 127.86 |
| Turkmenistan      | Pigmeat              | 2013 | kg | 1.45   |
| Turkmenistan      | PoultryMeat          | 2013 | kg | 3.81   |
| Uganda            | AquaticAnimalsOthers | 2013 | kg | 0      |
| Uganda            | AquaticPlants        | 2013 | kg | 0      |
| Uganda            | BovineMeat           | 2013 | kg | 5.15   |
| Uganda            | ButterGhee           | 2013 | kg | 0.01   |
| Uganda            | Cephalopods          | 2013 | kg | 0      |
| Uganda            | Cheese               | 2013 | kg | 0      |

|          |                      |      |    |        |  |
|----------|----------------------|------|----|--------|--|
| Uganda   | Cream                | 2013 | kg | 0      |  |
| Uganda   | DemersalFish         | 2013 | kg | 0      |  |
| Uganda   | Eggs                 | 2013 | kg | 0.97   |  |
| Uganda   | FreshwaterFish       | 2013 | kg | 12.46  |  |
| Uganda   | Honey                | 2013 | kg | 0.02   |  |
| Uganda   | MarineFishOther      | 2013 | kg | 0.01   |  |
| Uganda   | MilkWhole            | 2013 | kg | 37.05  |  |
| Uganda   | Pigmeat              | 2013 | kg | 3.37   |  |
| Uganda   | PoultryMeat          | 2013 | kg | 1.51   |  |
| Ukraine  | AquaticAnimalsOthers | 2013 | kg | 0.01   |  |
| Ukraine  | AquaticPlants        | 2013 | kg | 0      |  |
| Ukraine  | BovineMeat           | 2013 | kg | 8.96   |  |
| Ukraine  | ButterGhee           | 2013 | kg | 2.31   |  |
| Ukraine  | Cephalopods          | 2013 | kg | 0.01   |  |
| Ukraine  | Cheese               | 2013 | kg | 3.27   |  |
| Ukraine  | Cream                | 2013 | kg | 0.02   |  |
| Ukraine  | DemersalFish         | 2013 | kg | 1.94   |  |
| Ukraine  | Eggs                 | 2013 | kg | 18.01  |  |
| Ukraine  | FreshwaterFish       | 2013 | kg | 2.23   |  |
| Ukraine  | Honey                | 2013 | kg | 1.15   |  |
| Ukraine  | MarineFishOther      | 2013 | kg | 2.3    |  |
| Ukraine  | MilkWhole            | 2013 | kg | 119.46 |  |
| Ukraine  | Pigmeat              | 2013 | kg | 20.56  |  |
| Ukraine  | PoultryMeat          | 2013 | kg | 24.23  |  |
| Ukraine  | Whey                 | 2013 | kg | 0.34   |  |
| UAE      | AquaticAnimalsOthers | 2013 | kg | 0.01   |  |
| UAE      | AquaticPlants        | 2013 | kg | 0      |  |
| UAE      | BovineMeat           | 2013 | kg | 5.64   |  |
| UAE      | ButterGhee           | 2013 | kg | 1.62   |  |
| UAE      | Cephalopods          | 2013 | kg | 0.21   |  |
| UAE      | Cheese               | 2013 | kg | 3.58   |  |
| UAE      | Cream                | 2013 | kg | 0.61   |  |
| UAE      | DemersalFish         | 2013 | kg | 13.12  |  |
| UAE      | Eggs                 | 2013 | kg | 8.23   |  |
| UAE      | FreshwaterFish       | 2013 | kg | 0.79   |  |
| UAE      | Honey                | 2013 | kg | 0.25   |  |
| UAE      | MarineFishOther      | 2013 | kg | 1.55   |  |
| UAE      | MilkWhole            | 2013 | kg | 77.32  |  |
| UAE      | PoultryMeat          | 2013 | kg | 41.04  |  |
| UK       | AquaticAnimalsOthers | 2013 | kg | 0.01   |  |
| UK       | AquaticPlants        | 2013 | kg | 0      |  |
| UK       | BovineMeat           | 2013 | kg | 18.12  |  |
| UK       | ButterGhee           | 2013 | kg | 3.28   |  |
| UK       | Cephalopods          | 2013 | kg | 0.2    |  |
| UK       | Cheese               | 2013 | kg | 11.33  |  |
| UK       | Cream                | 2013 | kg | 0.27   |  |
| UK       | DemersalFish         | 2013 | kg | 8.92   |  |
| UK       | Eggs                 | 2013 | kg | 11.08  |  |
| UK       | FreshwaterFish       | 2013 | kg | 3.07   |  |
| UK       | Honey                | 2013 | kg | 0.66   |  |
| UK       | MarineFishOther      | 2013 | kg | 0.07   |  |
| UK       | MilkWhole            | 2013 | kg | 113.37 |  |
| UK       | Pigmeat              | 2013 | kg | 25.79  |  |
| UK       | PoultryMeat          | 2013 | kg | 31.55  |  |
| Tanzania | AquaticAnimalsOthers | 2013 | kg | 0      |  |
| Tanzania | AquaticPlants        | 2013 | kg | 0      |  |

|            |                      |      |    |        |  |
|------------|----------------------|------|----|--------|--|
| Tanzania   | BovineMeat           | 2013 | kg | 6.09   |  |
| Tanzania   | ButterGhee           | 2013 | kg | 0.64   |  |
| Tanzania   | Cephalopods          | 2013 | kg | 0.01   |  |
| Tanzania   | Cheese               | 2013 | kg | 0.27   |  |
| Tanzania   | Cream                | 2013 | kg | 0      |  |
| Tanzania   | DemersalFish         | 2013 | kg | 0.53   |  |
| Tanzania   | Eggs                 | 2013 | kg | 0.58   |  |
| Tanzania   | FreshwaterFish       | 2013 | kg | 4.71   |  |
| Tanzania   | Honey                | 2013 | kg | 0.61   |  |
| Tanzania   | MarineFishOther      | 2013 | kg | 0.08   |  |
| Tanzania   | MilkWhole            | 2013 | kg | 23.51  |  |
| Tanzania   | Pigmeat              | 2013 | kg | 0.32   |  |
| Tanzania   | PoultryMeat          | 2013 | kg | 1.84   |  |
| Tanzania   | Whey                 | 2013 | kg | 0.02   |  |
| USA        | AquaticAnimalsOthers | 2013 | kg | 0.04   |  |
| USA        | AquaticPlants        | 2013 | kg | 0      |  |
| USA        | BovineMeat           | 2013 | kg | 36.24  |  |
| USA        | ButterGhee           | 2013 | kg | 2.13   |  |
| USA        | Cephalopods          | 2013 | kg | 0.35   |  |
| USA        | Cheese               | 2013 | kg | 15.77  |  |
| USA        | Cream                | 2013 | kg | 0.06   |  |
| USA        | DemersalFish         | 2013 | kg | 4.22   |  |
| USA        | Eggs                 | 2013 | kg | 14.58  |  |
| USA        | FreshwaterFish       | 2013 | kg | 5.23   |  |
| USA        | Honey                | 2013 | kg | 0.67   |  |
| USA        | MarineFishOther      | 2013 | kg | 0.01   |  |
| USA        | MilkWhole            | 2013 | kg | 104.15 |  |
| USA        | Pigmeat              | 2013 | kg | 27.64  |  |
| USA        | PoultryMeat          | 2013 | kg | 50.01  |  |
| USA        | Whey                 | 2013 | kg | 0.41   |  |
| Uruguay    | AquaticAnimalsOthers | 2013 | kg | 0      |  |
| Uruguay    | AquaticPlants        | 2013 | kg | 0      |  |
| Uruguay    | BovineMeat           | 2013 | kg | 29.1   |  |
| Uruguay    | ButterGhee           | 2013 | kg | 1.33   |  |
| Uruguay    | Cephalopods          | 2013 | kg | 0.2    |  |
| Uruguay    | Cheese               | 2013 | kg | 10.53  |  |
| Uruguay    | Cream                | 2013 | kg | 0.15   |  |
| Uruguay    | DemersalFish         | 2013 | kg | 2.45   |  |
| Uruguay    | Eggs                 | 2013 | kg | 13.14  |  |
| Uruguay    | FreshwaterFish       | 2013 | kg | 1.46   |  |
| Uruguay    | Honey                | 2013 | kg | 1.07   |  |
| Uruguay    | MarineFishOther      | 2013 | kg | 0.18   |  |
| Uruguay    | MilkWhole            | 2013 | kg | 115.25 |  |
| Uruguay    | Pigmeat              | 2013 | kg | 16.84  |  |
| Uruguay    | PoultryMeat          | 2013 | kg | 27.45  |  |
| Uruguay    | Whey                 | 2013 | kg | 3.11   |  |
| Uzbekistan | AquaticAnimalsOthers | 2013 | kg | 0      |  |
| Uzbekistan | AquaticPlants        | 2013 | kg | 0      |  |
| Uzbekistan | BovineMeat           | 2013 | kg | 28.2   |  |
| Uzbekistan | ButterGhee           | 2013 | kg | 0.29   |  |
| Uzbekistan | Cephalopods          | 2013 | kg | 0      |  |
| Uzbekistan | Cheese               | 2013 | kg | 0.79   |  |
| Uzbekistan | Cream                | 2013 | kg | 0      |  |
| Uzbekistan | DemersalFish         | 2013 | kg | 0.02   |  |
| Uzbekistan | Eggs                 | 2013 | kg | 5.23   |  |
| Uzbekistan | FreshwaterFish       | 2013 | kg | 0.44   |  |

|            |                      |      |    |        |  |
|------------|----------------------|------|----|--------|--|
| Uzbekistan | Honey                | 2013 | kg | 0.25   |  |
| Uzbekistan | MarineFishOther      | 2013 | kg | 0.04   |  |
| Uzbekistan | MilkWhole            | 2013 | kg | 124.79 |  |
| Uzbekistan | Pigmeat              | 2013 | kg | 1.03   |  |
| Uzbekistan | PoultryMeat          | 2013 | kg | 1.87   |  |
| Vanuatu    | AquaticAnimalsOthers | 2013 | kg | 0      |  |
| Vanuatu    | AquaticPlants        | 2013 | kg | 0      |  |
| Vanuatu    | BovineMeat           | 2013 | kg | 11.22  |  |
| Vanuatu    | ButterGhee           | 2013 | kg | 0.03   |  |
| Vanuatu    | Cephalopods          | 2013 | kg | 0.14   |  |
| Vanuatu    | Cheese               | 2013 | kg | 0.18   |  |
| Vanuatu    | Cream                | 2013 | kg | 0.19   |  |
| Vanuatu    | DemersalFish         | 2013 | kg | 0.31   |  |
| Vanuatu    | Eggs                 | 2013 | kg | 3.36   |  |
| Vanuatu    | FreshwaterFish       | 2013 | kg | 0.37   |  |
| Vanuatu    | Honey                | 2013 | kg | 0.01   |  |
| Vanuatu    | MarineFishOther      | 2013 | kg | 13.43  |  |
| Vanuatu    | MilkWhole            | 2013 | kg | 22.84  |  |
| Vanuatu    | Pigmeat              | 2013 | kg | 15.14  |  |
| Vanuatu    | PoultryMeat          | 2013 | kg | 11.75  |  |
| Venezuela  | AquaticAnimalsOthers | 2013 | kg | 0      |  |
| Venezuela  | AquaticPlants        | 2013 | kg | 0      |  |
| Venezuela  | BovineMeat           | 2013 | kg | 25.89  |  |
| Venezuela  | ButterGhee           | 2013 | kg | 0.14   |  |
| Venezuela  | Cephalopods          | 2013 | kg | 0.24   |  |
| Venezuela  | Cheese               | 2013 | kg | 7.79   |  |
| Venezuela  | Cream                | 2013 | kg | 0.13   |  |
| Venezuela  | DemersalFish         | 2013 | kg | 2.15   |  |
| Venezuela  | Eggs                 | 2013 | kg | 5.63   |  |
| Venezuela  | FreshwaterFish       | 2013 | kg | 1.56   |  |
| Venezuela  | Honey                | 2013 | kg | 0.02   |  |
| Venezuela  | MarineFishOther      | 2013 | kg | 0.18   |  |
| Venezuela  | MilkWhole            | 2013 | kg | 48.26  |  |
| Venezuela  | Pigmeat              | 2013 | kg | 7.23   |  |
| Venezuela  | PoultryMeat          | 2013 | kg | 39.28  |  |
| Vietnam    | AquaticAnimalsOthers | 2013 | kg | 0.33   |  |
| Vietnam    | AquaticPlants        | 2013 | kg | 0      |  |
| Vietnam    | BovineMeat           | 2013 | kg | 7.44   |  |
| Vietnam    | ButterGhee           | 2013 | kg | 0.22   |  |
| Vietnam    | Cephalopods          | 2013 | kg | 1.52   |  |
| Vietnam    | Cheese               | 2013 | kg | 0.04   |  |
| Vietnam    | Cream                | 2013 | kg | 0.01   |  |
| Vietnam    | DemersalFish         | 2013 | kg | 0.07   |  |
| Vietnam    | Eggs                 | 2013 | kg | 3.84   |  |
| Vietnam    | FreshwaterFish       | 2013 | kg | 12.95  |  |
| Vietnam    | Honey                | 2013 | kg | 0      |  |
| Vietnam    | MarineFishOther      | 2013 | kg | 12.53  |  |
| Vietnam    | MilkWhole            | 2013 | kg | 8.37   |  |
| Vietnam    | Pigmeat              | 2013 | kg | 35     |  |
| Vietnam    | PoultryMeat          | 2013 | kg | 12.36  |  |
| Vietnam    | Whey                 | 2013 | kg | 5.93   |  |
| Yemen      | AquaticAnimalsOthers | 2013 | kg | 0      |  |
| Yemen      | AquaticPlants        | 2013 | kg | 0      |  |
| Yemen      | BovineMeat           | 2013 | kg | 4.75   |  |
| Yemen      | ButterGhee           | 2013 | kg | 0.13   |  |
| Yemen      | Cephalopods          | 2013 | kg | 0      |  |

|          |                 |      |    |       |
|----------|-----------------|------|----|-------|
| Yemen    | Cheese          | 2013 | kg | 1.95  |
| Yemen    | Cream           | 2013 | kg | 0.03  |
| Yemen    | DemersalFish    | 2013 | kg | 1.1   |
| Yemen    | Eggs            | 2013 | kg | 2.23  |
| Yemen    | FreshwaterFish  | 2013 | kg | 0.04  |
| Yemen    | Honey           | 2013 | kg | 0.1   |
| Yemen    | MilkWhole       | 2013 | kg | 9.95  |
| Yemen    | Pigmeat         | 2013 | kg | 0.01  |
| Yemen    | PoultryMeat     | 2013 | kg | 10.72 |
| Zambia   | AquaticPlants   | 2013 | kg | 0     |
| Zambia   | BovineMeat      | 2013 | kg | 4.76  |
| Zambia   | ButterGhee      | 2013 | kg | 0.02  |
| Zambia   | Cephalopods     | 2013 | kg | 0     |
| Zambia   | Cheese          | 2013 | kg | 0.12  |
| Zambia   | Cream           | 2013 | kg | 0     |
| Zambia   | DemersalFish    | 2013 | kg | 0     |
| Zambia   | Eggs            | 2013 | kg | 3.32  |
| Zambia   | FreshwaterFish  | 2013 | kg | 5.49  |
| Zambia   | Honey           | 2013 | kg | 0.03  |
| Zambia   | MarineFishOther | 2013 | kg | 0.57  |
| Zambia   | MilkWhole       | 2013 | kg | 6.99  |
| Zambia   | Pigmeat         | 2013 | kg | 1.66  |
| Zambia   | PoultryMeat     | 2013 | kg | 3.29  |
| Zambia   | Whey            | 2013 | kg | 0.31  |
| Zimbabwe | AquaticPlants   | 2013 | kg | 0     |
| Zimbabwe | BovineMeat      | 2013 | kg | 7.37  |
| Zimbabwe | ButterGhee      | 2013 | kg | 0.17  |
| Zimbabwe | Cephalopods     | 2013 | kg | 0     |
| Zimbabwe | Cheese          | 2013 | kg | 0.21  |
| Zimbabwe | Cream           | 2013 | kg | 0.07  |
| Zimbabwe | DemersalFish    | 2013 | kg | 0.01  |
| Zimbabwe | Eggs            | 2013 | kg | 1.75  |
| Zimbabwe | FreshwaterFish  | 2013 | kg | 2.05  |
| Zimbabwe | Honey           | 2013 | kg | 0     |
| Zimbabwe | MarineFishOther | 2013 | kg | 0.12  |
| Zimbabwe | MilkWhole       | 2013 | kg | 26.13 |
| Zimbabwe | Pigmeat         | 2013 | kg | 2.65  |
| Zimbabwe | PoultryMeat     | 2013 | kg | 4.97  |
| Zimbabwe | Whey            | 2013 | kg | 0.28  |

;  
run;

/\*\*\*\*\*\* CROP \*\*\*\*\*/

```
data crop;
input country $ element $ quantity;
cards;
Afghanistan BeveragesAlcoholic 0
Afghanistan Maizeandproducts 2.5
Afghanistan Potatoesandproducts 7.53
Afghanistan RiceMilledEquivalent 13.82
Afghanistan Wheatandproducts 160.23
```

|                   |                      |        |  |
|-------------------|----------------------|--------|--|
| Afghanistan       | Wine                 | 0      |  |
| Albania           | BeveragesAlcoholic   | 2.65   |  |
| Albania           | Maizeandproducts     | 1.79   |  |
| Albania           | Potatoesandproducts  | 41.26  |  |
| Albania           | RiceMilledEquivalent | 7.78   |  |
| Albania           | Wheatandproducts     | 138.64 |  |
| Albania           | Wine                 | 7.97   |  |
| Algeria           | BeveragesAlcoholic   | 0.18   |  |
| Algeria           | Maizeandproducts     | 15.99  |  |
| Algeria           | Potatoesandproducts  | 64.78  |  |
| Algeria           | RiceMilledEquivalent | 2.97   |  |
| Algeria           | Wheatandproducts     | 185.42 |  |
| Algeria           | Wine                 | 0.01   |  |
| Angola            | BeveragesAlcoholic   | 1.94   |  |
| Angola            | Maizeandproducts     | 38.8   |  |
| Angola            | Potatoesandproducts  | 20.39  |  |
| Angola            | RiceMilledEquivalent | 8.12   |  |
| Angola            | Wheatandproducts     | 40.72  |  |
| Angola            | Wine                 | 4.67   |  |
| AntiguaandBarbuda | BeveragesAlcoholic   | 5.33   |  |
| AntiguaandBarbuda | Maizeandproducts     | 2.44   |  |
| AntiguaandBarbuda | Potatoesandproducts  | 15.63  |  |
| AntiguaandBarbuda | RiceMilledEquivalent | 9.46   |  |
| AntiguaandBarbuda | Wheatandproducts     | 62.06  |  |
| AntiguaandBarbuda | Wine                 | 9.49   |  |
| Argentina         | BeveragesAlcoholic   | 1.81   |  |
| Argentina         | Maizeandproducts     | 10.44  |  |
| Argentina         | Potatoesandproducts  | 32.85  |  |
| Argentina         | RiceMilledEquivalent | 8.77   |  |
| Argentina         | Wheatandproducts     | 103.11 |  |
| Argentina         | Wine                 | 25.04  |  |
| Armenia           | BeveragesAlcoholic   | 0.17   |  |
| Armenia           | Maizeandproducts     | 0.03   |  |
| Armenia           | Potatoesandproducts  | 45.1   |  |
| Armenia           | RiceMilledEquivalent | 3.18   |  |
| Armenia           | Wheatandproducts     | 130.6  |  |
| Armenia           | Wine                 | 1.48   |  |
| Australia         | BeveragesAlcoholic   | 1.16   |  |
| Australia         | Maizeandproducts     | 4.94   |  |
| Australia         | Potatoesandproducts  | 54.58  |  |
| Australia         | RiceMilledEquivalent | 11.03  |  |
| Australia         | Wheatandproducts     | 70.46  |  |
| Australia         | Wine                 | 19.48  |  |
| Austria           | BeveragesAlcoholic   | 4.91   |  |
| Austria           | Maizeandproducts     | 12.33  |  |
| Austria           | Potatoesandproducts  | 58.34  |  |
| Austria           | RiceMilledEquivalent | 3.7    |  |
| Austria           | Wheatandproducts     | 81.1   |  |
| Austria           | Wine                 | 31.71  |  |
| Azerbaijan        | BeveragesAlcoholic   | 9.77   |  |
| Azerbaijan        | Maizeandproducts     | 13.33  |  |
| Azerbaijan        | Potatoesandproducts  | 73.85  |  |
| Azerbaijan        | RiceMilledEquivalent | 2.04   |  |
| Azerbaijan        | Wheatandproducts     | 222.4  |  |
| Azerbaijan        | Wine                 | 0.23   |  |
| Bahamas           | BeveragesAlcoholic   | 11.4   |  |



|            |                      |        |
|------------|----------------------|--------|
| Bahamas    | Maizeandproducts     | 3.59   |
| Bahamas    | Potatoesandproducts  | 8.3    |
| Bahamas    | RiceMilledEquivalent | 23.97  |
| Bahamas    | Wheatandproducts     | 39.98  |
| Bahamas    | Wine                 | 4.53   |
| Bangladesh | BeveragesAlcoholic   | 0.01   |
| Bangladesh | Maizeandproducts     | 0.8    |
| Bangladesh | Potatoesandproducts  | 46.4   |
| Bangladesh | RiceMilledEquivalent | 171.73 |
| Bangladesh | Wheatandproducts     | 17.47  |
| Bangladesh | Wine                 | 0      |
| Barbados   | BeveragesAlcoholic   | 2.34   |
| Barbados   | Maizeandproducts     | 11.9   |
| Barbados   | Potatoesandproducts  | 49.24  |
| Barbados   | RiceMilledEquivalent | 15.66  |
| Barbados   | Wheatandproducts     | 65.71  |
| Barbados   | Wine                 | 8.45   |
| Belarus    | BeveragesAlcoholic   | 15.35  |
| Belarus    | Maizeandproducts     | 0.57   |
| Belarus    | Potatoesandproducts  | 183.16 |
| Belarus    | RiceMilledEquivalent | 3.17   |
| Belarus    | Wheatandproducts     | 60.48  |
| Belarus    | Wine                 | 8.74   |
| Belgium    | BeveragesAlcoholic   | 1.71   |
| Belgium    | Maizeandproducts     | 2.22   |
| Belgium    | Potatoesandproducts  | 93.41  |
| Belgium    | RiceMilledEquivalent | 8.61   |
| Belgium    | Wheatandproducts     | 111.91 |
| Belgium    | Wine                 | 27.49  |
| Belize     | BeveragesAlcoholic   | 6.03   |
| Belize     | Maizeandproducts     | 31.75  |
| Belize     | Potatoesandproducts  | 14.24  |
| Belize     | RiceMilledEquivalent | 28.42  |
| Belize     | Wheatandproducts     | 54.06  |
| Belize     | Wine                 | 2.21   |
| Benin      | BeveragesAlcoholic   | 0.29   |
| Benin      | Maizeandproducts     | 42.7   |
| Benin      | Potatoesandproducts  | 0.1    |
| Benin      | RiceMilledEquivalent | 53.44  |
| Benin      | Wheatandproducts     | 13.06  |
| Benin      | Wine                 | 0.42   |
| Bermuda    | BeveragesAlcoholic   | 3.94   |
| Bermuda    | Maizeandproducts     | 2.9    |
| Bermuda    | Potatoesandproducts  | 16.03  |
| Bermuda    | RiceMilledEquivalent | 5.38   |
| Bermuda    | Wheatandproducts     | 54.88  |
| Bermuda    | Wine                 | 13.49  |
| Bolivia    | BeveragesAlcoholic   | 0.67   |
| Bolivia    | Maizeandproducts     | 38.86  |
| Bolivia    | Potatoesandproducts  | 64.66  |
| Bolivia    | RiceMilledEquivalent | 26.99  |
| Bolivia    | Wheatandproducts     | 49.99  |
| Bolivia    | Wine                 | 0.87   |
| BosniaH    | BeveragesAlcoholic   | 18.77  |
| BosniaH    | Maizeandproducts     | 77.32  |
| BosniaH    | Potatoesandproducts  | 76.12  |

|             |                      |        |
|-------------|----------------------|--------|
| BosniaH     | RiceMilledEquivalent | 1.88   |
| BosniaH     | Wheatandproducts     | 93.56  |
| BosniaH     | Wine                 | 1.88   |
| Botswana    | BeveragesAlcoholic   | 0.71   |
| Botswana    | Maizeandproducts     | 38.45  |
| Botswana    | Potatoesandproducts  | 12.88  |
| Botswana    | RiceMilledEquivalent | 7.06   |
| Botswana    | Wheatandproducts     | 38.2   |
| Botswana    | Wine                 | 2.52   |
| Brazil      | BeveragesAlcoholic   | 3.59   |
| Brazil      | Maizeandproducts     | 28.01  |
| Brazil      | Potatoesandproducts  | 17.9   |
| Brazil      | RiceMilledEquivalent | 32.13  |
| Brazil      | Wheatandproducts     | 53     |
| Brazil      | Wine                 | 1.59   |
| Brunei      | BeveragesAlcoholic   | 0.02   |
| Brunei      | Maizeandproducts     | 12.77  |
| Brunei      | Potatoesandproducts  | 12.14  |
| Brunei      | RiceMilledEquivalent | 76.67  |
| Brunei      | Wheatandproducts     | 42.94  |
| Brunei      | Wine                 | 0.06   |
| Bulgaria    | BeveragesAlcoholic   | 8.31   |
| Bulgaria    | Maizeandproducts     | 26.82  |
| Bulgaria    | Potatoesandproducts  | 27.5   |
| Bulgaria    | RiceMilledEquivalent | 2.24   |
| Bulgaria    | Wheatandproducts     | 121.17 |
| Bulgaria    | Wine                 | 11.58  |
| BurkinaFaso | BeveragesAlcoholic   | 0.33   |
| BurkinaFaso | Maizeandproducts     | 68.51  |
| BurkinaFaso | Potatoesandproducts  | 0.27   |
| BurkinaFaso | RiceMilledEquivalent | 21.43  |
| BurkinaFaso | Wheatandproducts     | 11.1   |
| BurkinaFaso | Wine                 | 0.19   |
| CaboVerde   | BeveragesAlcoholic   | 0.84   |
| CaboVerde   | Maizeandproducts     | 38.83  |
| CaboVerde   | Potatoesandproducts  | 31.34  |
| CaboVerde   | RiceMilledEquivalent | 48.75  |
| CaboVerde   | Wheatandproducts     | 38.64  |
| CaboVerde   | Wine                 | 7.14   |
| Cambodia    | BeveragesAlcoholic   | 1.65   |
| Cambodia    | Maizeandproducts     | 12.48  |
| Cambodia    | Potatoesandproducts  | 0.05   |
| Cambodia    | RiceMilledEquivalent | 159.1  |
| Cambodia    | Wheatandproducts     | 2.74   |
| Cambodia    | Wine                 | 0.1    |
| Cameroon    | BeveragesAlcoholic   | 0.01   |
| Cameroon    | Maizeandproducts     | 42.01  |
| Cameroon    | Potatoesandproducts  | 6.4    |
| Cameroon    | RiceMilledEquivalent | 23.85  |
| Cameroon    | Wheatandproducts     | 22.6   |
| Cameroon    | Wine                 | 0.47   |
| Canada      | BeveragesAlcoholic   | 0.06   |
| Canada      | Maizeandproducts     | 18.95  |
| Canada      | Potatoesandproducts  | 71.07  |
| Canada      | RiceMilledEquivalent | 12.65  |
| Canada      | Wheatandproducts     | 84.96  |

|                        |                      |        |  |
|------------------------|----------------------|--------|--|
| Canada                 | Wine                 | 11.45  |  |
| CentralAfricanRepublic | BeveragesAlcoholic   | 0.02   |  |
| CentralAfricanRepublic | Maizeandproducts     | 27.4   |  |
| CentralAfricanRepublic | Potatoesandproducts  | 0.13   |  |
| CentralAfricanRepublic | RiceMilledEquivalent | 7.39   |  |
| CentralAfricanRepublic | Wheatandproducts     | 5.62   |  |
| CentralAfricanRepublic | Wine                 | 0.04   |  |
| Chad                   | BeveragesAlcoholic   | 0.05   |  |
| Chad                   | Maizeandproducts     | 16.47  |  |
| Chad                   | Potatoesandproducts  | 3.26   |  |
| Chad                   | RiceMilledEquivalent | 10.81  |  |
| Chad                   | Wheatandproducts     | 9.27   |  |
| Chad                   | Wine                 | 0.17   |  |
| Chile                  | BeveragesAlcoholic   | 2.49   |  |
| Chile                  | Maizeandproducts     | 21.04  |  |
| Chile                  | Potatoesandproducts  | 61.82  |  |
| Chile                  | RiceMilledEquivalent | 8.85   |  |
| Chile                  | Wheatandproducts     | 104.74 |  |
| Chile                  | Wine                 | 17.04  |  |
| HongKong               | BeveragesAlcoholic   | 1.94   |  |
| HongKong               | Maizeandproducts     | 4.47   |  |
| HongKong               | Potatoesandproducts  | 24.71  |  |
| HongKong               | RiceMilledEquivalent | 43.48  |  |
| HongKong               | Wheatandproducts     | 53.14  |  |
| HongKong               | Wine                 | 4.24   |  |
| ChinaMacaoSAR          | BeveragesAlcoholic   | 5.12   |  |
| ChinaMacaoSAR          | Maizeandproducts     | 0.42   |  |
| ChinaMacaoSAR          | Potatoesandproducts  | 14.25  |  |
| ChinaMacaoSAR          | RiceMilledEquivalent | 36.5   |  |
| ChinaMacaoSAR          | Wheatandproducts     | 56.41  |  |
| ChinaMacaoSAR          | Wine                 | 11.6   |  |
| China                  | BeveragesAlcoholic   | 5.04   |  |
| China                  | Maizeandproducts     | 6.78   |  |
| China                  | Potatoesandproducts  | 41.42  |  |
| China                  | RiceMilledEquivalent | 78.18  |  |
| China                  | Wheatandproducts     | 63.36  |  |
| China                  | Wine                 | 1.5    |  |
| ChinaTaiwanProvinceof  | BeveragesAlcoholic   | 4.74   |  |
| ChinaTaiwanProvinceof  | Maizeandproducts     | 8.36   |  |
| ChinaTaiwanProvinceof  | Potatoesandproducts  | 6.94   |  |
| ChinaTaiwanProvinceof  | RiceMilledEquivalent | 45.85  |  |
| ChinaTaiwanProvinceof  | Wheatandproducts     | 50.92  |  |
| ChinaTaiwanProvinceof  | Wine                 | 0.71   |  |
| Colombia               | BeveragesAlcoholic   | 2.27   |  |
| Colombia               | Maizeandproducts     | 30.15  |  |
| Colombia               | Potatoesandproducts  | 33.45  |  |
| Colombia               | RiceMilledEquivalent | 28.02  |  |
| Colombia               | Wheatandproducts     | 29.79  |  |
| Colombia               | Wine                 | 0.35   |  |
| Congo                  | BeveragesAlcoholic   | 0.76   |  |
| Congo                  | Maizeandproducts     | 3.65   |  |
| Congo                  | Potatoesandproducts  | 2.07   |  |
| Congo                  | RiceMilledEquivalent | 16.51  |  |
| Congo                  | Wheatandproducts     | 40.07  |  |
| Congo                  | Wine                 | 1.03   |  |
| CostaRica              | BeveragesAlcoholic   | 8.07   |  |

|           |                      |        |
|-----------|----------------------|--------|
| CostaRica | Maizeandproducts     | 10.77  |
| CostaRica | Potatoesandproducts  | 15.41  |
| CostaRica | RiceMilledEquivalent | 45.69  |
| CostaRica | Wheatandproducts     | 39.31  |
| CostaRica | Wine                 | 2.02   |
| IvoryCoa  | BeveragesAlcoholic   | 0.01   |
| IvoryCoa  | Maizeandproducts     | 21.99  |
| IvoryCoa  | Potatoesandproducts  | 0.38   |
| IvoryCoa  | RiceMilledEquivalent | 63.56  |
| IvoryCoa  | Wheatandproducts     | 20.75  |
| IvoryCoa  | Wine                 | 1.34   |
| Croatia   | BeveragesAlcoholic   | 3.34   |
| Croatia   | Maizeandproducts     | 9.86   |
| Croatia   | Potatoesandproducts  | 42.33  |
| Croatia   | RiceMilledEquivalent | 2.64   |
| Croatia   | Wheatandproducts     | 106.59 |
| Croatia   | Wine                 | 13.8   |
| Cuba      | BeveragesAlcoholic   | 7.97   |
| Cuba      | Maizeandproducts     | 28.2   |
| Cuba      | Potatoesandproducts  | 9.47   |
| Cuba      | RiceMilledEquivalent | 67.7   |
| Cuba      | Wheatandproducts     | 54.62  |
| Cuba      | Wine                 | 1.55   |
| Cyprus    | BeveragesAlcoholic   | 2.45   |
| Cyprus    | Maizeandproducts     | 3.3    |
| Cyprus    | Potatoesandproducts  | 29.93  |
| Cyprus    | RiceMilledEquivalent | 4.94   |
| Cyprus    | Wheatandproducts     | 83.25  |
| Cyprus    | Wine                 | 15.7   |
| Czechia   | BeveragesAlcoholic   | 5.76   |
| Czechia   | Maizeandproducts     | 0      |
| Czechia   | Potatoesandproducts  | 75.49  |
| Czechia   | RiceMilledEquivalent | 4.79   |
| Czechia   | Wheatandproducts     | 92.67  |
| Czechia   | Wine                 | 9.17   |
| NKorea    | BeveragesAlcoholic   | 6.39   |
| NKorea    | Maizeandproducts     | 45.81  |
| NKorea    | Potatoesandproducts  | 49.02  |
| NKorea    | RiceMilledEquivalent | 74.18  |
| NKorea    | Wheatandproducts     | 21.37  |
| Denmark   | BeveragesAlcoholic   | 3.37   |
| Denmark   | Maizeandproducts     | 4.71   |
| Denmark   | Potatoesandproducts  | 62.56  |
| Denmark   | RiceMilledEquivalent | 4.96   |
| Denmark   | Wheatandproducts     | 98     |
| Denmark   | Wine                 | 28.26  |
| Djibouti  | BeveragesAlcoholic   | 1.3    |
| Djibouti  | Maizeandproducts     | 1.21   |
| Djibouti  | Potatoesandproducts  | 16.66  |
| Djibouti  | RiceMilledEquivalent | 43.46  |
| Djibouti  | Wheatandproducts     | 119    |
| Djibouti  | Wine                 | 0.96   |
| Dominica  | BeveragesAlcoholic   | 9.38   |
| Dominica  | Maizeandproducts     | 5.8    |
| Dominica  | Potatoesandproducts  | 13.28  |
| Dominica  | RiceMilledEquivalent | 8.4    |

|                 |                      |        |  |
|-----------------|----------------------|--------|--|
| Dominica        | Wheatandproducts     | 71.28  |  |
| Dominica        | Wine                 | 2.32   |  |
| Dominr          | BeveragesAlcoholic   | 4.01   |  |
| Dominr          | Maizeandproducts     | 3.67   |  |
| Dominr          | Potatoesandproducts  | 6.09   |  |
| Dominr          | RiceMilledEquivalent | 52.49  |  |
| Dominr          | Wheatandproducts     | 30.27  |  |
| Dominr          | Wine                 | 1.2    |  |
| Ecuador         | BeveragesAlcoholic   | 0.64   |  |
| Ecuador         | Maizeandproducts     | 8.3    |  |
| Ecuador         | Potatoesandproducts  | 19.33  |  |
| Ecuador         | RiceMilledEquivalent | 45.07  |  |
| Ecuador         | Wheatandproducts     | 39.19  |  |
| Ecuador         | Wine                 | 0.32   |  |
| Egypt           | BeveragesAlcoholic   | 0.05   |  |
| Egypt           | Maizeandproducts     | 62.42  |  |
| Egypt           | Potatoesandproducts  | 36.46  |  |
| Egypt           | RiceMilledEquivalent | 39.77  |  |
| Egypt           | Wheatandproducts     | 146.83 |  |
| Egypt           | Wine                 | 0.05   |  |
| ElSalvador      | BeveragesAlcoholic   | 3.09   |  |
| ElSalvador      | Maizeandproducts     | 70.09  |  |
| ElSalvador      | Potatoesandproducts  | 14.28  |  |
| ElSalvador      | RiceMilledEquivalent | 10.53  |  |
| ElSalvador      | Wheatandproducts     | 28.19  |  |
| ElSalvador      | Wine                 | 0.34   |  |
| Estonia         | BeveragesAlcoholic   | 26.9   |  |
| Estonia         | Maizeandproducts     | 5.37   |  |
| Estonia         | Potatoesandproducts  | 88.45  |  |
| Estonia         | RiceMilledEquivalent | 2.56   |  |
| Estonia         | Wheatandproducts     | 89.36  |  |
| Estonia         | Wine                 | 15.59  |  |
| Ethiopia        | BeveragesAlcoholic   | 0.17   |  |
| Ethiopia        | Maizeandproducts     | 42.08  |  |
| Ethiopia        | Potatoesandproducts  | 6.65   |  |
| Ethiopia        | RiceMilledEquivalent | 2.25   |  |
| Ethiopia        | Wheatandproducts     | 31.26  |  |
| Ethiopia        | Wine                 | 0.02   |  |
| Fiji            | BeveragesAlcoholic   | 1.08   |  |
| Fiji            | Maizeandproducts     | 0.33   |  |
| Fiji            | Potatoesandproducts  | 28.36  |  |
| Fiji            | RiceMilledEquivalent | 45.62  |  |
| Fiji            | Wheatandproducts     | 84.22  |  |
| Fiji            | Wine                 | 1.14   |  |
| Finland         | BeveragesAlcoholic   | 4.06   |  |
| Finland         | Potatoesandproducts  | 65.65  |  |
| Finland         | RiceMilledEquivalent | 4.42   |  |
| Finland         | Wheatandproducts     | 81.99  |  |
| Finland         | Wine                 | 11.79  |  |
| France          | BeveragesAlcoholic   | 2.26   |  |
| France          | Maizeandproducts     | 11.11  |  |
| France          | Potatoesandproducts  | 53.79  |  |
| France          | RiceMilledEquivalent | 4.88   |  |
| France          | Wheatandproducts     | 108.43 |  |
| France          | Wine                 | 37.78  |  |
| FrenchPolynesia | BeveragesAlcoholic   | 1.08   |  |

|                 |                      |        |
|-----------------|----------------------|--------|
| FrenchPolynesia | Maizeandproducts     | 0      |
| FrenchPolynesia | Potatoesandproducts  | 34.42  |
| FrenchPolynesia | RiceMilledEquivalent | 35.59  |
| FrenchPolynesia | Wheatandproducts     | 68.67  |
| FrenchPolynesia | Wine                 | 9.48   |
| Gabon           | BeveragesAlcoholic   | 2.81   |
| Gabon           | Maizeandproducts     | 16     |
| Gabon           | Potatoesandproducts  | 3.87   |
| Gabon           | RiceMilledEquivalent | 37.07  |
| Gabon           | Wheatandproducts     | 62.87  |
| Gabon           | Wine                 | 4.33   |
| Gambia          | BeveragesAlcoholic   | 0.01   |
| Gambia          | Maizeandproducts     | 14.18  |
| Gambia          | Potatoesandproducts  | 1.62   |
| Gambia          | RiceMilledEquivalent | 61.84  |
| Gambia          | Wheatandproducts     | 37.91  |
| Gambia          | Wine                 | 0.12   |
| Georgia         | BeveragesAlcoholic   | 2.77   |
| Georgia         | Maizeandproducts     | 27.18  |
| Georgia         | Potatoesandproducts  | 56.1   |
| Georgia         | RiceMilledEquivalent | 2.64   |
| Georgia         | Wheatandproducts     | 163.43 |
| Georgia         | Wine                 | 14.73  |
| Germany         | BeveragesAlcoholic   | 10.61  |
| Germany         | Maizeandproducts     | 12.13  |
| Germany         | Potatoesandproducts  | 61.46  |
| Germany         | RiceMilledEquivalent | 3.34   |
| Germany         | Wheatandproducts     | 83.41  |
| Germany         | Wine                 | 22.91  |
| Ghana           | BeveragesAlcoholic   | 0.18   |
| Ghana           | Maizeandproducts     | 25.48  |
| Ghana           | Potatoesandproducts  | 0.24   |
| Ghana           | RiceMilledEquivalent | 32.03  |
| Ghana           | Wheatandproducts     | 14.45  |
| Ghana           | Wine                 | 0.39   |
| Greece          | BeveragesAlcoholic   | 2.27   |
| Greece          | Maizeandproducts     | 1.92   |
| Greece          | Potatoesandproducts  | 72.4   |
| Greece          | RiceMilledEquivalent | 6.64   |
| Greece          | Wheatandproducts     | 124.04 |
| Greece          | Wine                 | 18.69  |
| Grenada         | BeveragesAlcoholic   | 8.53   |
| Grenada         | Maizeandproducts     | 4.96   |
| Grenada         | Potatoesandproducts  | 10.27  |
| Grenada         | RiceMilledEquivalent | 9.56   |
| Grenada         | Wheatandproducts     | 59.59  |
| Grenada         | Wine                 | 3.16   |
| Guatemala       | BeveragesAlcoholic   | 1.72   |
| Guatemala       | Maizeandproducts     | 87.25  |
| Guatemala       | Potatoesandproducts  | 10.79  |
| Guatemala       | RiceMilledEquivalent | 5.66   |
| Guatemala       | Wheatandproducts     | 35.9   |
| Guatemala       | Wine                 | 0.23   |
| Guinea          | BeveragesAlcoholic   | 0.03   |
| Guinea          | Maizeandproducts     | 8.87   |
| Guinea          | Potatoesandproducts  | 7.04   |

|               |                      |        |
|---------------|----------------------|--------|
| Guinea        | RiceMilledEquivalent | 97.12  |
| Guinea        | Wheatandproducts     | 18.55  |
| Guinea        | Wine                 | 0.12   |
| Guinea-Bissau | BeveragesAlcoholic   | 0.73   |
| Guinea-Bissau | Maizeandproducts     | 3.88   |
| Guinea-Bissau | Potatoesandproducts  | 1.7    |
| Guinea-Bissau | RiceMilledEquivalent | 98.09  |
| Guinea-Bissau | Wheatandproducts     | 11.33  |
| Guinea-Bissau | Wine                 | 3.81   |
| Guyana        | BeveragesAlcoholic   | 3.48   |
| Guyana        | Maizeandproducts     | 2.05   |
| Guyana        | Potatoesandproducts  | 12.25  |
| Guyana        | RiceMilledEquivalent | 76.58  |
| Guyana        | Wheatandproducts     | 59.66  |
| Guyana        | Wine                 | 0.1    |
| Haiti         | BeveragesAlcoholic   | 8.75   |
| Haiti         | Maizeandproducts     | 23.14  |
| Haiti         | Potatoesandproducts  | 3.69   |
| Haiti         | RiceMilledEquivalent | 42.75  |
| Haiti         | Wheatandproducts     | 16.11  |
| Haiti         | Wine                 | 0.08   |
| Honduras      | BeveragesAlcoholic   | 3.25   |
| Honduras      | Maizeandproducts     | 77.96  |
| Honduras      | Potatoesandproducts  | 5.46   |
| Honduras      | RiceMilledEquivalent | 14.42  |
| Honduras      | Wheatandproducts     | 37.36  |
| Honduras      | Wine                 | 0.24   |
| Hungary       | BeveragesAlcoholic   | 6.33   |
| Hungary       | Maizeandproducts     | 0.25   |
| Hungary       | Potatoesandproducts  | 46.43  |
| Hungary       | RiceMilledEquivalent | 2.15   |
| Hungary       | Wheatandproducts     | 109.98 |
| Hungary       | Wine                 | 23.97  |
| Iceland       | BeveragesAlcoholic   | 1.36   |
| Iceland       | Potatoesandproducts  | 32.08  |
| Iceland       | RiceMilledEquivalent | 3.89   |
| Iceland       | Wheatandproducts     | 72.92  |
| Iceland       | Wine                 | 10.96  |
| India         | BeveragesAlcoholic   | 1.62   |
| India         | Maizeandproducts     | 6.29   |
| India         | Potatoesandproducts  | 24.4   |
| India         | RiceMilledEquivalent | 69.49  |
| India         | Wheatandproducts     | 60.56  |
| India         | Wine                 | 0      |
| Indonesia     | BeveragesAlcoholic   | 0.11   |
| Indonesia     | Maizeandproducts     | 35.3   |
| Indonesia     | Potatoesandproducts  | 4.22   |
| Indonesia     | RiceMilledEquivalent | 134.62 |
| Indonesia     | Wheatandproducts     | 25.45  |
| Indonesia     | Wine                 | 0      |
| Iran          | BeveragesAlcoholic   | 0      |
| Iran          | Maizeandproducts     | 2.37   |
| Iran          | Potatoesandproducts  | 50.64  |
| Iran          | RiceMilledEquivalent | 29.95  |
| Iran          | Wheatandproducts     | 153.31 |
| Iran          | Wine                 | 0      |

|            |                      |        |
|------------|----------------------|--------|
| Iraq       | BeveragesAlcoholic   | 0.4    |
| Iraq       | Maizeandproducts     | 0.3    |
| Iraq       | Potatoesandproducts  | 17.85  |
| Iraq       | RiceMilledEquivalent | 40.54  |
| Iraq       | Wheatandproducts     | 136.47 |
| Iraq       | Wine                 | 0.02   |
| Ireland    | BeveragesAlcoholic   | 8.64   |
| Ireland    | Maizeandproducts     | 9.19   |
| Ireland    | Potatoesandproducts  | 94.01  |
| Ireland    | RiceMilledEquivalent | 3      |
| Ireland    | Wheatandproducts     | 107.98 |
| Ireland    | Wine                 | 16.5   |
| Israel     | BeveragesAlcoholic   | 1.75   |
| Israel     | Maizeandproducts     | 14.75  |
| Israel     | Potatoesandproducts  | 39.9   |
| Israel     | RiceMilledEquivalent | 16.81  |
| Israel     | Wheatandproducts     | 110.86 |
| Israel     | Wine                 | 0.86   |
| Italy      | BeveragesAlcoholic   | 0.82   |
| Italy      | Maizeandproducts     | 4.23   |
| Italy      | Potatoesandproducts  | 38.16  |
| Italy      | RiceMilledEquivalent | 5.74   |
| Italy      | Wheatandproducts     | 146.37 |
| Italy      | Wine                 | 30.55  |
| Jamaica    | BeveragesAlcoholic   | 3.09   |
| Jamaica    | Maizeandproducts     | 7.06   |
| Jamaica    | Potatoesandproducts  | 11.36  |
| Jamaica    | RiceMilledEquivalent | 23.45  |
| Jamaica    | Wheatandproducts     | 70.67  |
| Jamaica    | Wine                 | 0.86   |
| Japan      | BeveragesAlcoholic   | 8.99   |
| Japan      | Maizeandproducts     | 9.21   |
| Japan      | Potatoesandproducts  | 20.95  |
| Japan      | RiceMilledEquivalent | 59.85  |
| Japan      | Wheatandproducts     | 45.04  |
| Japan      | Wine                 | 2.72   |
| Jordan     | BeveragesAlcoholic   | 0.13   |
| Jordan     | Maizeandproducts     | 2.68   |
| Jordan     | Potatoesandproducts  | 20.79  |
| Jordan     | RiceMilledEquivalent | 19.67  |
| Jordan     | Wheatandproducts     | 136.74 |
| Jordan     | Wine                 | 0.05   |
| Kazakhstan | BeveragesAlcoholic   | 6.37   |
| Kazakhstan | Maizeandproducts     | 0.82   |
| Kazakhstan | Potatoesandproducts  | 111.34 |
| Kazakhstan | RiceMilledEquivalent | 7.32   |
| Kazakhstan | Wheatandproducts     | 92.31  |
| Kazakhstan | Wine                 | 2.67   |
| Kenya      | BeveragesAlcoholic   | 0.57   |
| Kenya      | Maizeandproducts     | 76.2   |
| Kenya      | Potatoesandproducts  | 41.66  |
| Kenya      | RiceMilledEquivalent | 12.94  |
| Kenya      | Wheatandproducts     | 34.65  |
| Kenya      | Wine                 | 0.13   |
| Kiribati   | BeveragesAlcoholic   | 0      |
| Kiribati   | Maizeandproducts     | 0.31   |



|                               |                      |        |  |
|-------------------------------|----------------------|--------|--|
| Kiribati                      | Potatoesandproducts  | 0.44   |  |
| Kiribati                      | RiceMilledEquivalent | 65.75  |  |
| Kiribati                      | Wheatandproducts     | 48.64  |  |
| Kiribati                      | Wine                 | 0.08   |  |
| Kuwait                        | BeveragesAlcoholic   | 0      |  |
| Kuwait                        | Maizeandproducts     | 5.99   |  |
| Kuwait                        | Potatoesandproducts  | 65.07  |  |
| Kuwait                        | RiceMilledEquivalent | 43.83  |  |
| Kuwait                        | Wheatandproducts     | 96.76  |  |
| Kyrgyzstan                    | BeveragesAlcoholic   | 3.87   |  |
| Kyrgyzstan                    | Maizeandproducts     | 26.16  |  |
| Kyrgyzstan                    | Potatoesandproducts  | 99.27  |  |
| Kyrgyzstan                    | RiceMilledEquivalent | 7.31   |  |
| Kyrgyzstan                    | Wheatandproducts     | 129.09 |  |
| Kyrgyzstan                    | Wine                 | 0.61   |  |
| LaoPeople'sDemocraticRepublic | BeveragesAlcoholic   | 5.27   |  |
| LaoPeople'sDemocraticRepublic | Maizeandproducts     | 15.44  |  |
| LaoPeople'sDemocraticRepublic | Potatoesandproducts  | 3.39   |  |
| LaoPeople'sDemocraticRepublic | RiceMilledEquivalent | 159.11 |  |
| LaoPeople'sDemocraticRepublic | Wheatandproducts     | 1.89   |  |
| LaoPeople'sDemocraticRepublic | Wine                 | 0.33   |  |
| Latvia                        | BeveragesAlcoholic   | 8.97   |  |
| Latvia                        | Maizeandproducts     | 0.24   |  |
| Latvia                        | Potatoesandproducts  | 116.52 |  |
| Latvia                        | RiceMilledEquivalent | 2.21   |  |
| Latvia                        | Wheatandproducts     | 72.13  |  |
| Latvia                        | Wine                 | 3.25   |  |
| Lebanon                       | BeveragesAlcoholic   | 2.79   |  |
| Lebanon                       | Maizeandproducts     | 0.41   |  |
| Lebanon                       | Potatoesandproducts  | 44.03  |  |
| Lebanon                       | RiceMilledEquivalent | 10.84  |  |
| Lebanon                       | Wheatandproducts     | 119.72 |  |
| Lebanon                       | Wine                 | 2.7    |  |
| Lesotho                       | BeveragesAlcoholic   | 0.44   |  |
| Lesotho                       | Maizeandproducts     | 158.4  |  |
| Lesotho                       | Potatoesandproducts  | 56.52  |  |
| Lesotho                       | RiceMilledEquivalent | 3.73   |  |
| Lesotho                       | Wheatandproducts     | 52.7   |  |
| Lesotho                       | Wine                 | 0.42   |  |
| Liberia                       | BeveragesAlcoholic   | 3.46   |  |
| Liberia                       | Maizeandproducts     | 0.04   |  |
| Liberia                       | Potatoesandproducts  | 0.27   |  |
| Liberia                       | RiceMilledEquivalent | 94.75  |  |
| Liberia                       | Wheatandproducts     | 10.95  |  |
| Liberia                       | Wine                 | 0.08   |  |
| Lithuania                     | BeveragesAlcoholic   | 15.21  |  |
| Lithuania                     | Maizeandproducts     | 0.66   |  |
| Lithuania                     | Potatoesandproducts  | 95.75  |  |
| Lithuania                     | RiceMilledEquivalent | 3.07   |  |
| Lithuania                     | Wheatandproducts     | 121.59 |  |
| Lithuania                     | Wine                 | 13.21  |  |
| Luxembourg                    | BeveragesAlcoholic   | 11     |  |
| Luxembourg                    | Maizeandproducts     | 4.64   |  |
| Luxembourg                    | Potatoesandproducts  | 55.75  |  |
| Luxembourg                    | RiceMilledEquivalent | 4.2    |  |
| Luxembourg                    | Wheatandproducts     | 103.2  |  |

|            |                      |        |
|------------|----------------------|--------|
| Luxembourg | Wine                 | 51.41  |
| Madagascar | BeveragesAlcoholic   | 0.49   |
| Madagascar | Maizeandproducts     | 17.98  |
| Madagascar | Potatoesandproducts  | 5.64   |
| Madagascar | RiceMilledEquivalent | 102.53 |
| Madagascar | Wheatandproducts     | 9.01   |
| Madagascar | Wine                 | 0.39   |
| Malawi     | BeveragesAlcoholic   | 0.32   |
| Malawi     | Maizeandproducts     | 129.24 |
| Malawi     | Potatoesandproducts  | 131.69 |
| Malawi     | RiceMilledEquivalent | 4.75   |
| Malawi     | Wheatandproducts     | 11.77  |
| Malawi     | Wine                 | 0.01   |
| Malaysia   | BeveragesAlcoholic   | 0      |
| Malaysia   | Maizeandproducts     | 15.82  |
| Malaysia   | Potatoesandproducts  | 10.97  |
| Malaysia   | RiceMilledEquivalent | 81.25  |
| Malaysia   | Wheatandproducts     | 51.04  |
| Malaysia   | Wine                 | 0.13   |
| Maldives   | BeveragesAlcoholic   | 1.04   |
| Maldives   | Maizeandproducts     | 0.83   |
| Maldives   | Potatoesandproducts  | 15.55  |
| Maldives   | RiceMilledEquivalent | 50.73  |
| Maldives   | Wheatandproducts     | 77.77  |
| Maldives   | Wine                 | 1.83   |
| Mali       | BeveragesAlcoholic   | 0.03   |
| Mali       | Maizeandproducts     | 38.05  |
| Mali       | Potatoesandproducts  | 6.51   |
| Mali       | RiceMilledEquivalent | 56.99  |
| Mali       | Wheatandproducts     | 12.48  |
| Mali       | Wine                 | 0.03   |
| Malta      | BeveragesAlcoholic   | 4.72   |
| Malta      | Maizeandproducts     | 5.38   |
| Malta      | Potatoesandproducts  | 48.61  |
| Malta      | RiceMilledEquivalent | 4.96   |
| Malta      | Wheatandproducts     | 139.58 |
| Malta      | Wine                 | 15.37  |
| Mauritania | BeveragesAlcoholic   | 0.02   |
| Mauritania | Maizeandproducts     | 3.2    |
| Mauritania | Potatoesandproducts  | 6.89   |
| Mauritania | RiceMilledEquivalent | 48.43  |
| Mauritania | Wheatandproducts     | 100.77 |
| Mauritania | Wine                 | 0      |
| Mauritius  | BeveragesAlcoholic   | 1.57   |
| Mauritius  | Maizeandproducts     | 2.97   |
| Mauritius  | Potatoesandproducts  | 19.29  |
| Mauritius  | RiceMilledEquivalent | 45.56  |
| Mauritius  | Wheatandproducts     | 114.02 |
| Mauritius  | Wine                 | 1.54   |
| Mexico     | BeveragesAlcoholic   | 0.63   |
| Mexico     | Maizeandproducts     | 116.34 |
| Mexico     | Potatoesandproducts  | 14.86  |
| Mexico     | RiceMilledEquivalent | 5.64   |
| Mexico     | Wheatandproducts     | 35.21  |
| Mexico     | Wine                 | 0.09   |
| Mongolia   | BeveragesAlcoholic   | 4.58   |

|              |                      |        |
|--------------|----------------------|--------|
| Mongolia     | Maizeandproducts     | 0.02   |
| Mongolia     | Potatoesandproducts  | 48.73  |
| Mongolia     | RiceMilledEquivalent | 7.68   |
| Mongolia     | Wheatandproducts     | 124.64 |
| Mongolia     | Wine                 | 0.77   |
| Montenegro   | BeveragesAlcoholic   | 3.28   |
| Montenegro   | Maizeandproducts     | 4.39   |
| Montenegro   | Potatoesandproducts  | 119.31 |
| Montenegro   | RiceMilledEquivalent | 2.24   |
| Montenegro   | Wheatandproducts     | 121.89 |
| Montenegro   | Wine                 | 20.77  |
| Morocco      | BeveragesAlcoholic   | 0.19   |
| Morocco      | Maizeandproducts     | 36.11  |
| Morocco      | Potatoesandproducts  | 48.56  |
| Morocco      | RiceMilledEquivalent | 1.1    |
| Morocco      | Wheatandproducts     | 179.7  |
| Morocco      | Wine                 | 0.98   |
| Mozambique   | BeveragesAlcoholic   | 0.34   |
| Mozambique   | Maizeandproducts     | 54.56  |
| Mozambique   | Potatoesandproducts  | 8.04   |
| Mozambique   | RiceMilledEquivalent | 23.41  |
| Mozambique   | Wheatandproducts     | 14.65  |
| Mozambique   | Wine                 | 0.38   |
| Myanmar      | BeveragesAlcoholic   | 0.48   |
| Myanmar      | Maizeandproducts     | 3.87   |
| Myanmar      | Potatoesandproducts  | 9.98   |
| Myanmar      | RiceMilledEquivalent | 132.8  |
| Myanmar      | Wheatandproducts     | 6.22   |
| Myanmar      | Wine                 | 0.07   |
| Namibia      | BeveragesAlcoholic   | 1.77   |
| Namibia      | Maizeandproducts     | 43.41  |
| Namibia      | Potatoesandproducts  | 16.11  |
| Namibia      | RiceMilledEquivalent | 6.31   |
| Namibia      | Wheatandproducts     | 36.26  |
| Namibia      | Wine                 | 4.46   |
| Nepal        | BeveragesAlcoholic   | 0.19   |
| Nepal        | Maizeandproducts     | 43.41  |
| Nepal        | Potatoesandproducts  | 80.56  |
| Nepal        | RiceMilledEquivalent | 87.75  |
| Nepal        | Wheatandproducts     | 50.46  |
| Nepal        | Wine                 | 0.03   |
| Netherlands  | BeveragesAlcoholic   | 2.71   |
| Netherlands  | Maizeandproducts     | 2.47   |
| Netherlands  | Potatoesandproducts  | 90.83  |
| Netherlands  | RiceMilledEquivalent | 2.93   |
| Netherlands  | Wheatandproducts     | 70.17  |
| Netherlands  | Wine                 | 20.57  |
| NewCaledonia | BeveragesAlcoholic   | 3.78   |
| NewCaledonia | Maizeandproducts     | 0.7    |
| NewCaledonia | Potatoesandproducts  | 31.3   |
| NewCaledonia | RiceMilledEquivalent | 17.47  |
| NewCaledonia | Wheatandproducts     | 81.75  |
| NewCaledonia | Wine                 | 20.15  |
| NewZealand   | BeveragesAlcoholic   | 3.69   |
| NewZealand   | Maizeandproducts     | 4.43   |
| NewZealand   | Potatoesandproducts  | 53.93  |

|             |                      |        |
|-------------|----------------------|--------|
| NewZealand  | RiceMilledEquivalent | 9.16   |
| NewZealand  | Wheatandproducts     | 76.91  |
| NewZealand  | Wine                 | 7.58   |
| Nicaragua   | BeveragesAlcoholic   | 2.72   |
| Nicaragua   | Maizeandproducts     | 68.53  |
| Nicaragua   | Potatoesandproducts  | 6.24   |
| Nicaragua   | RiceMilledEquivalent | 43.33  |
| Nicaragua   | Wheatandproducts     | 28.17  |
| Nicaragua   | Wine                 | 0.2    |
| Niger       | BeveragesAlcoholic   | 0.07   |
| Niger       | Maizeandproducts     | 3.76   |
| Niger       | Potatoesandproducts  | 4.43   |
| Niger       | RiceMilledEquivalent | 13.17  |
| Niger       | Wheatandproducts     | 4.79   |
| Niger       | Wine                 | 0.04   |
| Nigeria     | BeveragesAlcoholic   | 0.08   |
| Nigeria     | Maizeandproducts     | 32.72  |
| Nigeria     | Potatoesandproducts  | 4.63   |
| Nigeria     | RiceMilledEquivalent | 28.23  |
| Nigeria     | Wheatandproducts     | 20.82  |
| Nigeria     | Wine                 | 0.16   |
| Norway      | BeveragesAlcoholic   | 2.48   |
| Norway      | Maizeandproducts     | 0      |
| Norway      | Potatoesandproducts  | 52.87  |
| Norway      | RiceMilledEquivalent | 4.36   |
| Norway      | Wheatandproducts     | 97.12  |
| Norway      | Wine                 | 16.24  |
| Oman        | Maizeandproducts     | 12.55  |
| Oman        | Potatoesandproducts  | 26.78  |
| Oman        | RiceMilledEquivalent | 56.55  |
| Oman        | Wheatandproducts     | 64.1   |
| Pakistan    | BeveragesAlcoholic   | 0      |
| Pakistan    | Maizeandproducts     | 14.54  |
| Pakistan    | Potatoesandproducts  | 15.33  |
| Pakistan    | RiceMilledEquivalent | 12.25  |
| Pakistan    | Wheatandproducts     | 113.63 |
| Pakistan    | Wine                 | 0      |
| Panama      | BeveragesAlcoholic   | 3.21   |
| Panama      | Maizeandproducts     | 25.56  |
| Panama      | Potatoesandproducts  | 13.98  |
| Panama      | RiceMilledEquivalent | 66.42  |
| Panama      | Wheatandproducts     | 38.96  |
| Panama      | Wine                 | 1.23   |
| Paraguay    | BeveragesAlcoholic   | 3.28   |
| Paraguay    | Maizeandproducts     | 59.32  |
| Paraguay    | Potatoesandproducts  | 2.9    |
| Paraguay    | RiceMilledEquivalent | 4.91   |
| Paraguay    | Wheatandproducts     | 31.51  |
| Paraguay    | Wine                 | 2.98   |
| Peru        | BeveragesAlcoholic   | 2.92   |
| Peru        | Maizeandproducts     | 19.41  |
| Peru        | Potatoesandproducts  | 82.5   |
| Peru        | RiceMilledEquivalent | 48.92  |
| Peru        | Wheatandproducts     | 56.12  |
| Peru        | Wine                 | 2.61   |
| Philippines | BeveragesAlcoholic   | 4.24   |

|                    |                      |        |  |
|--------------------|----------------------|--------|--|
| Philippines        | Maizeandproducts     | 20.11  |  |
| Philippines        | Potatoesandproducts  | 2.24   |  |
| Philippines        | RiceMilledEquivalent | 119.44 |  |
| Philippines        | Wheatandproducts     | 23.12  |  |
| Philippines        | Wine                 | 0.11   |  |
| Poland             | BeveragesAlcoholic   | 4.45   |  |
| Poland             | Potatoesandproducts  | 104    |  |
| Poland             | RiceMilledEquivalent | 0.95   |  |
| Poland             | Wheatandproducts     | 108.83 |  |
| Poland             | Wine                 | 2.8    |  |
| Portugal           | BeveragesAlcoholic   | 9.33   |  |
| Portugal           | Maizeandproducts     | 17.59  |  |
| Portugal           | Potatoesandproducts  | 69.58  |  |
| Portugal           | RiceMilledEquivalent | 14.86  |  |
| Portugal           | Wheatandproducts     | 94.3   |  |
| Portugal           | Wine                 | 40.35  |  |
| S.Korea            | BeveragesAlcoholic   | 5.13   |  |
| S.Korea            | Maizeandproducts     | 12.46  |  |
| S.Korea            | Potatoesandproducts  | 14.84  |  |
| S.Korea            | RiceMilledEquivalent | 85.18  |  |
| S.Korea            | Wheatandproducts     | 50.84  |  |
| S.Korea            | Wine                 | 0.67   |  |
| Moldova            | BeveragesAlcoholic   | 5.03   |  |
| Moldova            | Maizeandproducts     | 91.77  |  |
| Moldova            | Potatoesandproducts  | 53.99  |  |
| Moldova            | RiceMilledEquivalent | 2.95   |  |
| Moldova            | Wheatandproducts     | 47.89  |  |
| Moldova            | Wine                 | 10.34  |  |
| Romania            | BeveragesAlcoholic   | 1.38   |  |
| Romania            | Maizeandproducts     | 40.47  |  |
| Romania            | Potatoesandproducts  | 99.51  |  |
| Romania            | RiceMilledEquivalent | 2.59   |  |
| Romania            | Wheatandproducts     | 134.87 |  |
| Romania            | Wine                 | 20.78  |  |
| Russia             | BeveragesAlcoholic   | 7.73   |  |
| Russia             | Maizeandproducts     | 0.41   |  |
| Russia             | Potatoesandproducts  | 113.26 |  |
| Russia             | RiceMilledEquivalent | 4.71   |  |
| Russia             | Wheatandproducts     | 130.99 |  |
| Russia             | Wine                 | 9.15   |  |
| Rwanda             | BeveragesAlcoholic   | 0.26   |  |
| Rwanda             | Maizeandproducts     | 14.34  |  |
| Rwanda             | Potatoesandproducts  | 99.61  |  |
| Rwanda             | RiceMilledEquivalent | 8.7    |  |
| Rwanda             | Wheatandproducts     | 11.34  |  |
| Rwanda             | Wine                 | 0.06   |  |
| SaintKittsandNevis | BeveragesAlcoholic   | 2.96   |  |
| SaintKittsandNevis | Maizeandproducts     | 0.54   |  |
| SaintKittsandNevis | Potatoesandproducts  | 18.43  |  |
| SaintKittsandNevis | RiceMilledEquivalent | 19.87  |  |
| SaintKittsandNevis | Wheatandproducts     | 60.68  |  |
| SaintKittsandNevis | Wine                 | 4.3    |  |
| SaintLucia         | BeveragesAlcoholic   | 6.98   |  |
| SaintLucia         | Maizeandproducts     | 2.92   |  |
| SaintLucia         | Potatoesandproducts  | 12.56  |  |
| SaintLucia         | RiceMilledEquivalent | 10.38  |  |

|                     |                      |       |  |
|---------------------|----------------------|-------|--|
| Samoa               | Wheatandproducts     | 91.02 |  |
| Samoa               | Wine                 | 6.34  |  |
| SanTomásandPríncipe | BeveragesAlcoholic   | 9.47  |  |
| SanTomásandPríncipe | Maizeandproducts     | 9.3   |  |
| SanTomásandPríncipe | Potatoesandproducts  | 9.28  |  |
| SanTomásandPríncipe | RiceMilledEquivalent | 33.65 |  |
| SanTomásandPríncipe | Wheatandproducts     | 73.91 |  |
| SanTomásandPríncipe | Wine                 | 1.81  |  |
| Samoa               | BeveragesAlcoholic   | 0.16  |  |
| Samoa               | Maizeandproducts     | 0.4   |  |
| Samoa               | Potatoesandproducts  | 8.02  |  |
| Samoa               | RiceMilledE          |       |  |

|                |                      |        |
|----------------|----------------------|--------|
| SolomonIslands | Maizeandproducts     | 0.15   |
| SolomonIslands | Potatoesandproducts  | 0.17   |
| SolomonIslands | RiceMilledEquivalent | 63.76  |
| SolomonIslands | Wheatandproducts     | 25.37  |
| SolomonIslands | Wine                 | 0.07   |
| SouthAfrica    | BeveragesAlcoholic   | 6.98   |
| SouthAfrica    | Maizeandproducts     | 160.1  |
| SouthAfrica    | Potatoesandproducts  | 30.66  |
| SouthAfrica    | RiceMilledEquivalent | 17.41  |
| SouthAfrica    | Wheatandproducts     | 69.13  |
| SouthAfrica    | Wine                 | 7.71   |
| Spain          | BeveragesAlcoholic   | 2.13   |
| Spain          | Maizeandproducts     | 1.99   |
| Spain          | Potatoesandproducts  | 60.04  |
| Spain          | RiceMilledEquivalent | 8.32   |
| Spain          | Wheatandproducts     | 95.68  |
| Spain          | Wine                 | 20.96  |
| SriLanka       | BeveragesAlcoholic   | 0.2    |
| SriLanka       | Maizeandproducts     | 5.08   |
| SriLanka       | Potatoesandproducts  | 8.36   |
| SriLanka       | RiceMilledEquivalent | 109.72 |
| SriLanka       | Wheatandproducts     | 37.01  |
| SriLanka       | Wine                 | 0.07   |
| Sudan          | BeveragesAlcoholic   | 0.53   |
| Sudan          | Maizeandproducts     | 0.4    |
| Sudan          | Potatoesandproducts  | 9.26   |
| Sudan          | RiceMilledEquivalent | 1.27   |
| Sudan          | Wheatandproducts     | 22.52  |
| Suriname       | BeveragesAlcoholic   | 4.61   |
| Suriname       | Maizeandproducts     | 1.93   |
| Suriname       | Potatoesandproducts  | 19.19  |
| Suriname       | RiceMilledEquivalent | 66.66  |
| Suriname       | Wheatandproducts     | 52.61  |
| Suriname       | Wine                 | 1.29   |
| Eswatini       | BeveragesAlcoholic   | 0.15   |
| Eswatini       | Maizeandproducts     | 69.63  |
| Eswatini       | Potatoesandproducts  | 12.43  |
| Eswatini       | RiceMilledEquivalent | 21.15  |
| Eswatini       | Wheatandproducts     | 37.15  |
| Eswatini       | Wine                 | 2.64   |
| Sweden         | BeveragesAlcoholic   | 3.28   |
| Sweden         | Maizeandproducts     | 1.06   |
| Sweden         | Potatoesandproducts  | 69.81  |
| Sweden         | RiceMilledEquivalent | 6.96   |
| Sweden         | Wheatandproducts     | 79.69  |
| Sweden         | Wine                 | 20.76  |
| Switzerland    | BeveragesAlcoholic   | 2.94   |
| Switzerland    | Maizeandproducts     | 0.73   |
| Switzerland    | Potatoesandproducts  | 40.73  |
| Switzerland    | RiceMilledEquivalent | 2.43   |
| Switzerland    | Wheatandproducts     | 69.51  |
| Switzerland    | Wine                 | 36.96  |
| Tajikistan     | BeveragesAlcoholic   | 0.53   |
| Tajikistan     | Maizeandproducts     | 7.8    |
| Tajikistan     | Potatoesandproducts  | 35.91  |
| Tajikistan     | RiceMilledEquivalent | 6.99   |

|                   |                      |        |
|-------------------|----------------------|--------|
| Tajikistan        | Wheatandproducts     | 130.59 |
| Tajikistan        | Wine                 | 0.05   |
| Thailand          | BeveragesAlcoholic   | 10.23  |
| Thailand          | Maizeandproducts     | 10.16  |
| Thailand          | Potatoesandproducts  | 4.87   |
| Thailand          | RiceMilledEquivalent | 114.67 |
| Thailand          | Wheatandproducts     | 10.93  |
| Thailand          | Wine                 | 0.12   |
| NorthMacedonia    | BeveragesAlcoholic   | 1.34   |
| NorthMacedonia    | Maizeandproducts     | 22.72  |
| NorthMacedonia    | Potatoesandproducts  | 59.27  |
| NorthMacedonia    | RiceMilledEquivalent | 2.81   |
| NorthMacedonia    | Wheatandproducts     | 104.8  |
| NorthMacedonia    | Wine                 | 2.14   |
| Tirol-Leste       | BeveragesAlcoholic   | 0.09   |
| Tirol-Leste       | Maizeandproducts     | 83.55  |
| Tirol-Leste       | Potatoesandproducts  | 1.85   |
| Tirol-Leste       | RiceMilledEquivalent | 64.2   |
| Tirol-Leste       | Wheatandproducts     | 13.93  |
| Tirol-Leste       | Wine                 | 0.48   |
| Togo              | BeveragesAlcoholic   | 0.47   |
| Togo              | Maizeandproducts     | 69.58  |
| Togo              | Potatoesandproducts  | 0.31   |
| Togo              | RiceMilledEquivalent | 25.99  |
| Togo              | Wheatandproducts     | 12.91  |
| Togo              | Wine                 | 0.93   |
| TrinidadandTobago | BeveragesAlcoholic   | 3.86   |
| TrinidadandTobago | Maizeandproducts     | 9.07   |
| TrinidadandTobago | Potatoesandproducts  | 32.29  |
| TrinidadandTobago | RiceMilledEquivalent | 16.38  |
| TrinidadandTobago | Wheatandproducts     | 90.17  |
| TrinidadandTobago | Wine                 | 1.65   |
| Tunisia           | BeveragesAlcoholic   | 0.09   |
| Tunisia           | Potatoesandproducts  | 30.97  |
| Tunisia           | RiceMilledEquivalent | 1.07   |
| Tunisia           | Wheatandproducts     | 197.5  |
| Tunisia           | Wine                 | 2.68   |
| Turkey            | BeveragesAlcoholic   | 1.47   |
| Turkey            | Maizeandproducts     | 24.3   |
| Turkey            | Potatoesandproducts  | 40.04  |
| Turkey            | RiceMilledEquivalent | 10.74  |
| Turkey            | Wheatandproducts     | 169.96 |
| Turkey            | Wine                 | 0.39   |
| Turkmenistan      | BeveragesAlcoholic   | 0.02   |
| Turkmenistan      | Maizeandproducts     | 0.01   |
| Turkmenistan      | Potatoesandproducts  | 80.53  |
| Turkmenistan      | RiceMilledEquivalent | 10.98  |
| Turkmenistan      | Wheatandproducts     | 188.86 |
| Turkmenistan      | Wine                 | 7.47   |
| Uganda            | BeveragesAlcoholic   | 0.29   |
| Uganda            | Maizeandproducts     | 48.95  |
| Uganda            | Potatoesandproducts  | 3.94   |
| Uganda            | RiceMilledEquivalent | 4.64   |
| Uganda            | Wheatandproducts     | 10.14  |
| Uganda            | Wine                 | 0.05   |
| Ukraine           | BeveragesAlcoholic   | 9.77   |



|                               |                      |        |  |
|-------------------------------|----------------------|--------|--|
| Ukraine                       | Maizeandproducts     | 10.81  |  |
| Ukraine                       | Potatoesandproducts  | 135.94 |  |
| Ukraine                       | RiceMilledEquivalent | 3      |  |
| Ukraine                       | Wheatandproducts     | 105.15 |  |
| Ukraine                       | Wine                 | 3.94   |  |
| UAE                           | Maizeandproducts     | 1.14   |  |
| UAE                           | Potatoesandproducts  | 12.93  |  |
| UAE                           | RiceMilledEquivalent | 56.25  |  |
| UAE                           | Wheatandproducts     | 101.25 |  |
| UK                            | BeveragesAlcoholic   | 2.8    |  |
| UK                            | Maizeandproducts     | 2.9    |  |
| UK                            | Potatoesandproducts  | 103.85 |  |
| UK                            | RiceMilledEquivalent | 8.39   |  |
| UK                            | Wheatandproducts     | 98.63  |  |
| UK                            | Wine                 | 18.69  |  |
| Tanzania                      | BeveragesAlcoholic   | 0.67   |  |
| Tanzania                      | Maizeandproducts     | 58.47  |  |
| Tanzania                      | Potatoesandproducts  | 22.09  |  |
| Tanzania                      | RiceMilledEquivalent | 21.01  |  |
| Tanzania                      | Wheatandproducts     | 15.94  |  |
| Tanzania                      | Wine                 | 0.12   |  |
| USA                           | BeveragesAlcoholic   | 6.43   |  |
| USA                           | Maizeandproducts     | 12.24  |  |
| USA                           | Potatoesandproducts  | 51.88  |  |
| USA                           | RiceMilledEquivalent | 6.95   |  |
| USA                           | Wheatandproducts     | 80.43  |  |
| USA                           | Wine                 | 8.47   |  |
| Uruguay                       | BeveragesAlcoholic   | 2.24   |  |
| Uruguay                       | Maizeandproducts     | 26.6   |  |
| Uruguay                       | Potatoesandproducts  | 32.8   |  |
| Uruguay                       | RiceMilledEquivalent | 11.5   |  |
| Uruguay                       | Wheatandproducts     | 100.31 |  |
| Uruguay                       | Wine                 | 19.27  |  |
| Uzbekistan                    | BeveragesAlcoholic   | 3.29   |  |
| Uzbekistan                    | Maizeandproducts     | 4.79   |  |
| Uzbekistan                    | Potatoesandproducts  | 52.59  |  |
| Uzbekistan                    | RiceMilledEquivalent | 3.87   |  |
| Uzbekistan                    | Wheatandproducts     | 169.6  |  |
| Uzbekistan                    | Wine                 | 0.89   |  |
| Vanuatu                       | BeveragesAlcoholic   | 1.5    |  |
| Vanuatu                       | Maizeandproducts     | 0.04   |  |
| Vanuatu                       | Potatoesandproducts  | 40.21  |  |
| Vanuatu                       | RiceMilledEquivalent | 41.2   |  |
| Vanuatu                       | Wheatandproducts     | 51.21  |  |
| Vanuatu                       | Wine                 | 1.01   |  |
| VenezuelaBolivarianRepublicof | BeveragesAlcoholic   | 3.16   |  |
| VenezuelaBolivarianRepublicof | Maizeandproducts     | 55.25  |  |
| VenezuelaBolivarianRepublicof | Potatoesandproducts  | 19.2   |  |
| VenezuelaBolivarianRepublicof | RiceMilledEquivalent | 23.39  |  |
| VenezuelaBolivarianRepublicof | Wheatandproducts     | 49.17  |  |
| VenezuelaBolivarianRepublicof | Wine                 | 0.35   |  |
| Vietnam                       | BeveragesAlcoholic   | 3.46   |  |
| Vietnam                       | Maizeandproducts     | 9.74   |  |
| Vietnam                       | Potatoesandproducts  | 3.85   |  |
| Vietnam                       | RiceMilledEquivalent | 144.66 |  |
| Vietnam                       | Wheatandproducts     | 10.49  |  |

|          |                      |        |  |
|----------|----------------------|--------|--|
| Vietnam  | Wine                 | 0.13   |  |
| Yemen    | BeveragesAlcoholic   | 0.01   |  |
| Yemen    | Maizeandproducts     | 18.22  |  |
| Yemen    | Potatoesandproducts  | 10.99  |  |
| Yemen    | RiceMilledEquivalent | 17.36  |  |
| Yemen    | Wheatandproducts     | 110.24 |  |
| Yemen    | Wine                 | 0      |  |
| Zambia   | BeveragesAlcoholic   | 0.02   |  |
| Zambia   | Maizeandproducts     | 118.68 |  |
| Zambia   | Potatoesandproducts  | 2.42   |  |
| Zambia   | RiceMilledEquivalent | 3.05   |  |
| Zambia   | Wheatandproducts     | 12.1   |  |
| Zambia   | Wine                 | 0.01   |  |
| Zimbabwe | BeveragesAlcoholic   | 5.15   |  |
| Zimbabwe | Maizeandproducts     | 93.85  |  |
| Zimbabwe | Potatoesandproducts  | 0.85   |  |
| Zimbabwe | RiceMilledEquivalent | 10.09  |  |
| Zimbabwe | Wheatandproducts     | 31.31  |  |
| Zimbabwe | Wine                 | 0.27   |  |

```
};
run;
```

/(\*\*\*\*\* DATA Corona 1 June 2020 \*\*\*\*\*/)

```
data corona;
```

| Input | Num country | S       | TotalCases | NewCases | TotalDeaths | NewDeaths | TotalRecovered | ActiveCases | SeriousCases | TotCasesInpop | DeathsInpop; |
|-------|-------------|---------|------------|----------|-------------|-----------|----------------|-------------|--------------|---------------|--------------|
| 1     | USA         | 1837578 | 408        | 105196   | 3           | 598875    | 1131505        | 17075       | 5554         |               |              |
| 2     | Brazil      | 514992  | 143        | 29341    | 27          | 206555    | 279096         | 8318        | 2424         |               |              |
| 3     | Russia      | 414879  | 9035       | 4855     | 162         | 175677    | 234146         | 2300        | 2843         |               |              |
| 4     | Spain       | 298509  | .          | 27127    | .           | 198858    | 62424          | 617         | 6129         | 583           |              |
| 5     | UK          | 274762  | .          | 38489    | .           | .         | 1559           | 4049        | 567          |               |              |
| 6     | Italy       | 232997  | .          | 33415    | .           | 157507    | 42075          | 435         | 3853         | 553           |              |
| 7     | India       | 181327  | 718        | 5413     | 5           | 92027     | 90807          | 8944        | 139          | 4             |              |
| 8     | France      | 188982  | .          | 29802    | .           | 69355     | 91725          | 1319        | 2894         | 441           |              |
| 9     | Germany     | 183494  | .          | 9605     | .           | 165900    | 9989           | 702         | 2191         | 103           |              |
| 10    | Peru        | 164476  | .          | 4506     | .           | 67206     | 92762          | 968         | 4994         | 137           |              |
| 11    | Turkey      | 163942  | .          | 4540     | .           | 127973    | 31429          | 648         | 1946         | 54            |              |
| 12    | Iran        | 154445  | 2979       | 7978     | 81          | 121004    | 25563          | 2578        | 1841         | 9             |              |
| 13    | Chile       | 89688   | .          | 1054     | .           | 42727     | 55907          | 1383        | 5219         | 55            |              |
| 14    | Canada      | 90947   | .          | 7295     | .           | 48879     | 34773          | 1641        | 2411         | 193           |              |
| 15    | Mexico      | 90964   | 3152       | 9930     | 151         | 64326     | 16408          | 378         | 704          | 77            |              |
| 16    | SaudiArabia | 85291   | .          | 503      | .           | 62442     | 22316          | 384         | 2452         | 14            |              |
| 17    | China       | 83017   | 16         | 4634     | .           | 78307     | 76             | 3           | 58           | 3             |              |
| 18    | Pakistan    | 72460   | 2964       | 1543     | 60          | 25083     | 44834          | 111         | 329          | 7             |              |
| 19    | Belgium     | 58517   | 138        | 9486     | 19          | 15919     | 33112          | 183         | 6051         | 81            |              |
| 20    | Datar       | 56910   | .          | 36       | .           | 39290     | 26592          | 232         | 19783        | 13            |              |

|    |             |       |      |      |       |       |       |       |      |     |   |
|----|-------------|-------|------|------|-------|-------|-------|-------|------|-----|---|
| 21 | Bangladesh  | 49534 | 2391 | 672  | 22    | 10597 | 38265 | 1     | 301  | 4   |   |
| 22 | Netherlands | 48442 |      | 5956 |       |       | 159   | 2711  | 348  |     |   |
| 23 | Belarus     | 42566 |      | 235  |       | 18514 | 23807 | 92    | 4503 | 25  |   |
| 24 | Ecuador     | 39098 |      | 3358 |       | 19592 | 16148 | 220   | 2219 | 191 |   |
| 25 | Sweden      | 37542 |      | 4395 |       | 4971  | 29176 | 226   | 3719 | 435 |   |
| 26 | Singapore   | 35292 | 408  | 23   |       | 21699 | 13570 | 8     | 6036 | 4   |   |
| 27 | UAE         | 34557 | 264  |      | 17932 | 16361 | 1     | 3498  | 27   |     |   |
| 28 | SouthAfrica | 32583 |      | 683  |       | 16899 | 15191 | 128   | 652  | 12  |   |
| 29 | Portugal    | 32500 |      | 1410 |       | 19459 | 11651 | 64    | 3187 | 139 |   |
| 30 | Switzerland | 30871 | 9    | 1920 |       | 28309 | 451   | 28    | 3589 | 222 |   |
| 31 | Colombia    | 29383 |      | 939  |       | 8643  | 19901 | 136   | 578  | 16  |   |
| 32 | Kuwait      | 27762 | 719  | 220  | 8     | 12899 | 14843 | 204   | 8509 | 52  |   |
| 33 | Indonesia   | 26940 | 467  | 1641 | 26    | 7637  | 17882 |       | 99   | 6   |   |
| 34 | Ireland     | 24990 |      | 1652 |       | 22089 | 1249  | 36    | 5068 | 335 |   |
| 35 | Egypt       | 24985 |      | 959  |       | 6037  | 17999 | 41    | 245  | 9   |   |
| 36 | Ukraine     | 24012 | 340  | 716  | 10    | 9690  | 13634 | 263   | 549  | 16  |   |
| 37 | Poland      | 23967 | 201  | 1085 | 1     | 11449 | 11473 | 160   | 634  | 26  |   |
| 38 | Romania     | 19398 | 141  | 1270 | 4     | 13426 | 4702  | 158   | 1006 | 66  |   |
| 39 | Philippines | 18538 |      | 562  | 960   | 5     | 3979  | 13699 | 73   | 170 | 9 |
| 40 | doeInr      | 17289 |      | 502  |       | 10559 | 6224  | 110   | 1595 | 46  |   |
| 41 | Israel      | 17108 | 35   | 285  |       | 14826 | 1995  | 33    | 1960 | 31  |   |
| 42 | Japan       | 16851 |      | 891  |       | 14459 | 1501  | 119   | 133  | 7   |   |
| 43 | Argentina   | 16851 |      | 539  |       | 5336  | 10976 | 259   | 373  | 12  |   |
| 44 | Austria     | 16731 |      | 660  |       | 15599 | 470   | 27    | 1859 | 74  |   |
| 45 | Afghanistan | 15730 | 545  | 265  | 5     | 1428  | 14057 | 19    | 405  | 7   |   |
| 46 | Panama      | 13463 |      | 336  |       | 9514  | 3613  | 79    | 3125 | 76  |   |
| 47 | Dnan        | 12223 | 796  | 50   | 1     | 2682  | 9491  | 31    | 2399 | 10  |   |
| 48 | Denmark     | 11669 |      | 574  |       | 10362 | 733   | 20    | 2015 | 99  |   |
| 49 | S.Korea     | 11503 | 35   | 271  | 1     | 10422 | 610   | 15    | 224  | 5   |   |
| 50 | Serbia      | 11412 |      | 243  |       | 6998  | 4471  | 10    | 1306 | 28  |   |
| 51 | Bahrain     | 11398 |      | 19   |       | 6573  | 4706  | 12    | 6721 | 11  |   |
| 52 | Kazakhstan  | 11308 | 450  | 41   | 1     | 5404  | 5863  | 62    | 603  | 2   |   |
| 53 | Nigeria     | 10162 |      | 287  |       | 3007  | 6966  | 7     | 49   | 1   |   |
| 54 | Bolivia     | 9962  | 390  | 313  | 3     | 966   | 6701  | 3     | 856  | 27  |   |
| 55 | Armenia     | 9492  | 210  | 139  | 8     | 3402  | 5951  | 10    | 3204 | 47  |   |
| 56 | Algeria     | 9394  |      | 653  |       | 5748  | 2993  | 23    | 215  | 15  |   |
| 57 | Czechia     | 9273  | 5    | 320  |       | 6562  | 2391  | 15    | 866  | 30  |   |
| 58 | Norway      | 8440  |      | 236  |       | 7727  | 477   | 6     | 1558 | 44  |   |
| 59 | Moldova     | 8251  |      | 295  |       | 4581  | 3375  | 251   | 2045 | 73  |   |
| 60 | Gnats       | 8070  | 189  | 36   |       | 2947  | 5007  | 3     | 260  | 1   |   |
| 61 | Malaysia    | 7657  | 36   | 115  |       | 6404  | 1338  | 8     | 243  | 4   |   |
| 62 | Morocco     | 7619  | 12   | 265  |       | 5754  | 1860  | 18    | 212  | 6   |   |
| 63 | Australia   | 7204  | 9    | 103  |       | 6619  | 462   | 3     | 293  | 4   |   |
| 64 | Finland     | 6985  | 26   | 320  |       | 5600  | 1065  | 10    | 1243 | 58  |   |
| 65 | Iraq        | 6439  |      | 205  |       | 3156  | 3078  | 36    | 160  | 6   |   |
| 66 | Cameroon    | 5904  |      | 191  |       | 3566  | 2145  | 28    | 223  | 7   |   |
| 67 | Azerbaijan  | 5494  |      | 63   |       | 3429  | 2003  | 42    | 542  | 6   |   |
| 68 | Honduras    | 5202  | 108  | 212  | 11    | 537   | 4453  | 13    | 526  | 21  |   |
| 69 | Guatemala   | 5087  | 348  | 108  | 6     | 735   | 4244  | 5     | 284  | 6   |   |
| 70 | Sudan       | 5026  |      | 296  |       | 1423  | 3317  |       | 115  | 7   |   |
| 71 | Luxembourg  | 4018  |      | 110  |       | 3833  | 75    | 3     | 6428 | 176 |   |
| 72 | Tajikistan  | 3930  |      | 47   |       | 2004  | 1679  |       | 413  | 5   |   |
| 73 | Hungary     | 3892  | 16   | 627  | 1     | 2156  | 1209  | 25    | 403  | 55  |   |
| 74 | Senegal     | 3739  | 94   | 42   |       | 1868  | 1839  | 14    | 224  | 3   |   |
| 75 | Guinea      | 3706  |      | 23   |       | 2030  | 1853  | 24    | 283  | 2   |   |
| 76 | Uzbekistan  | 3662  | 39   | 15   |       | 2637  | 610   | 9     | 110  | 0   |   |

|     |                    |      |      |     |     |      |      |      |       |      |     |
|-----|--------------------|------|------|-----|-----|------|------|------|-------|------|-----|
| 77  | Djibouti           | 3384 | .    | 24  | .   | 1504 | 1826 | .    | 3399  | 24   |     |
| 78  | Thailand           | 3082 | 1    | 57  | .   | 2965 | 60   | 1    | 44    | 1    |     |
| 79  | DRC                | 3070 | .    | 72  | .   | 445  | 2550 | .    | 34    | 1    |     |
| 80  | Greece             | 2917 | .    | 175 | .   | 1374 | 1369 | 13   | 280   | 17   |     |
| 81  | IvoryCoast         | 2833 | .    | 33  | .   | 1436 | 1365 | .    | 108   | 1    |     |
| 82  | Gabon              | 2655 | .    | 17  | .   | 722  | 1916 | 15   | 1195  | 8    |     |
| 83  | ElSalvador         | 2582 | .    | 65  | 46  | .    | 1063 | 1473 | 53    | 398  | 7   |
| 84  | BosnianHerzegovina | .    | 2524 | 14  | .   | 154  | 1    | 1895 | 482   | 4    | 769 |
| 85  | Bulgaria           | 2519 | 6    | 140 | .   | 1090 | 1289 | 17   | 362   | 20   |     |
| 86  | Croatia            | 2346 | .    | 103 | .   | 2072 | 71   | 4    | 547   | 25   |     |
| 87  | NorthMacedonia     | 2226 | .    | .   | 133 | .    | 1552 | 541  | 21    | 1085 | 64  |
| 88  | Haiti              | 2124 | 259  | 44  | 3   | 24   | 2056 | .    | 186   | 4    |     |
| 89  | Cuba               | 2045 | .    | 83  | .   | 1809 | 153  | 4    | 181   | 7    |     |
| 90  | Somalia            | 1976 | .    | 78  | .   | 348  | 1550 | 2    | 125   | 5    |     |
| 91  | Kenya              | 1962 | .    | 64  | .   | 478  | 1420 | 7    | 37    | 1    |     |
| 92  | Estonia            | 1870 | 1    | 68  | .   | 1625 | 177  | .    | 1410  | 51   |     |
| 93  | Kyrgyzstan         | 1817 | .    | 89  | 18  | .    | 1181 | 620  | 4     | 279  | 2   |
| 94  | Iceland            | 1806 | .    | 10  | .   | 1794 | 2    | .    | 5295  | 29   |     |
| 95  | Nepal              | 1795 | 226  | 8   | .   | 221  | 1589 | .    | 62    | 0    |     |
| 96  | Maldives           | 1773 | .    | 5   | .   | 453  | 1315 | 9    | 3285  | 9    |     |
| 97  | Mayotte            | 1699 | .    | 21  | .   | 1335 | 293  | 9    | 6242  | 77   |     |
| 98  | Lithuania          | 1678 | 3    | 70  | .   | 1205 | 372  | 17   | 615   | 26   |     |
| 99  | SriLanka           | 1633 | .    | 11  | 1   | 801  | 821  | 1    | 76    | 1    |     |
| 100 | Slovakia           | 1522 | 1    | 28  | .   | 1365 | 126  | .    | 279   | 5    |     |
| 101 | Venezuela          | 1510 | .    | 14  | .   | 302  | 1194 | 3    | 53    | 1    |     |
| 102 | NewZealand         | 1504 | .    | 22  | .   | 1481 | 1    | .    | 301   | 4    |     |
| 103 | Slovenia           | 1473 | .    | 109 | 1   | 1358 | 6    | 1    | 709   | 52   |     |
| 104 | EquatorialGuinea   | 1306 | .    | .   | 12  | .    | 200  | 1094 | .     | 334  | 9   |
| 105 | Nali               | 1265 | .    | 77  | .   | 716  | 472  | .    | 63    | 4    |     |
| 106 | Guinea-Bissau      | 1256 | 1256 | .   | 8   | .    | 42   | 1206 | .     | 640  | 4   |
| 107 | Lebanon            | 1220 | .    | 27  | .   | 712  | 481  | 3    | 179   | 4    |     |
| 108 | Ethiopia           | 1172 | .    | 11  | .   | 209  | 952  | 4    | 10    | 0    |     |
| 109 | Albania            | 1143 | 6    | 33  | .   | 877  | 233  | 3    | 397   | 11   |     |
| 110 | Zambia             | 1089 | 32   | 7   | .   | 912  | 170  | 1    | 59    | 0    |     |
| 111 | HongKong           | 1088 | 3    | 4   | .   | 1037 | 47   | 2    | 145   | 1    |     |
| 112 | Tunisia            | 1084 | 7    | 48  | .   | 954  | 72   | 2    | 92    | 4    |     |
| 113 | Latvia             | 1066 | .    | 24  | .   | 745  | 287  | 3    | 565   | 13   |     |
| 114 | CostaRica          | 1056 | .    | 10  | .   | 669  | 377  | 4    | 207   | 2    |     |
| 115 | CAR                | 1011 | .    | 2   | 23  | 866  | .    | 210  | 0     |      |     |
| 116 | SouthSudan         | 994  | .    | 10  | .   | 6    | 870  | .    | 89    | 1    |     |
| 117 | Paraguay           | 986  | .    | 11  | .   | 477  | 498  | 2    | 138   | 2    |     |
| 118 | Niger              | 968  | .    | 64  | .   | 839  | 55   | .    | 40    | 3    |     |
| 119 | Cyprus             | 944  | .    | 17  | .   | 790  | 137  | 4    | 782   | 14   |     |
| 120 | SierraLeone        | 861  | .    | 46  | .   | 454  | 361  | .    | 108   | 6    |     |
| 121 | BurkinaFaso        | 847  | .    | 53  | .   | 720  | 74   | .    | 41    | 3    |     |
| 122 | Madagascar         | 826  | 55   | 6   | .   | 174  | 646  | 8    | 30    | 0    |     |
| 123 | Uruguay            | 823  | .    | 22  | .   | 685  | 116  | 5    | 237   | 6    |     |
| 124 | Georgia            | 794  | 11   | 12  | .   | 624  | 158  | 6    | 190   | 3    |     |
| 125 | Chad               | 778  | .    | 65  | .   | 491  | 222  | .    | 47    | 4    |     |
| 126 | Andorra            | 764  | .    | 51  | .   | 694  | 19   | 4    | 9889  | 660  |     |
| 127 | Nicaragua          | 759  | .    | 35  | .   | 370  | 354  | .    | 115   | 5    |     |
| 128 | Jordan             | 739  | .    | 9   | .   | 522  | 208  | 5    | 72    | 1    |     |
| 129 | DiamondPrincess    | 712  | .    | .   | 13  | .    | 651  | 48   | 4     | .    |     |
| 130 | SanMarino          | 671  | .    | 42  | .   | 369  | 270  | 1    | 19779 | 1238 |     |
| 131 | Malta              | 619  | 1    | 9   | .   | 637  | 73   | 1    | 1402  | 20   |     |
| 132 | Congo              | 611  | .    | 20  | .   | 179  | 412  | .    | 111   | 4    |     |

|     |                         |     |    |    |    |     |     |     |      |      |     |
|-----|-------------------------|-----|----|----|----|-----|-----|-----|------|------|-----|
| 133 | Jamaica                 | 598 | 5  | 9  | .  | 311 | 286 | 2   | 198  | 3    | .   |
| 134 | ChannelIslands          | 560 | .  | .  | 45 | .   | 515 | 0   | .    | 3223 | 259 |
| 135 | Mauritania              | 530 | .  | 23 | .  | 27  | 480 | .   | 114  | 5    | .   |
| 136 | Tanzania                | 509 | .  | 21 | .  | 183 | 305 | 7   | 9    | 0    | .   |
| 137 | FrenchGuiana            | 499 | .  | 1  | .  | .   | 200 | 298 | 2    | 1675 | 3   |
| 138 | SaoTomeandPrincipe      | 483 | .  | .  | 12 | .   | 68  | 403 | .    | 2208 | 55  |
| 139 | Runion                  | 471 | 1  | .  | .  | 411 | 59  | 1   | 526  | 1    | .   |
| 140 | Uganda                  | 457 | 40 | .  | .  | 72  | 385 | .   | 10   | .    | .   |
| 141 | Palestine               | 449 | 1  | 3  | .  | 372 | 74  | .   | 88   | 1    | .   |
| 142 | Taiwan                  | 443 | 1  | 7  | .  | 427 | 9   | .   | 19   | 0    | .   |
| 143 | Togo                    | 442 | .  | 13 | .  | 211 | 218 | .   | 94   | 2    | .   |
| 144 | CaboVerde               | 435 | .  | 4  | .  | 193 | 238 | .   | 783  | 7    | .   |
| 145 | Reanda                  | 370 | .  | 1  | .  | 256 | 113 | .   | 29   | 0    | .   |
| 146 | IsleofMan               | 336 | .  | 24 | .  | 309 | 3   | .   | 3933 | 262  | .   |
| 147 | Mauritius               | 335 | .  | 10 | .  | 322 | 3   | .   | 263  | 6    | .   |
| 148 | Vietnam                 | 328 | .  | .  | .  | 295 | 35  | 1   | 5    | .    | .   |
| 149 | Montenegro              | 324 | .  | 9  | .  | 315 | 0   | .   | 516  | 14   | .   |
| 150 | Yemen                   | 323 | .  | 80 | .  | 14  | 229 | .   | 11   | 3    | .   |
| 151 | Liberia                 | 288 | .  | 27 | .  | 157 | 104 | .   | 57   | 5    | .   |
| 152 | Eswatini                | 285 | .  | 2  | .  | 189 | 94  | .   | 246  | 2    | .   |
| 153 | Malawi                  | 284 | .  | 4  | .  | 42  | 238 | 1   | 15   | 0    | .   |
| 154 | Mozambique              | 254 | .  | 2  | .  | 91  | 161 | .   | 8    | 0    | .   |
| 155 | Benin                   | 232 | .  | 3  | .  | 143 | 86  | .   | 19   | 0    | .   |
| 156 | Nyaneer                 | 226 | 4  | 6  | .  | 138 | 84  | .   | 4    | 0    | .   |
| 157 | Martinique              | 203 | .  | 14 | .  | 98  | 88  | .   | 533  | 37   | .   |
| 158 | FaeroeIslands           | 187 | .  | .  | .  | .   | 187 | 0   | .    | 3828 | .   |
| 159 | Mongolia                | 185 | 6  | .  | .  | 44  | 141 | 19  | 57   | .    | .   |
| 160 | Zimbabwe                | 178 | .  | 4  | .  | 29  | 145 | .   | 12   | 0    | .   |
| 161 | Gibraltar               | 170 | .  | .  | .  | 151 | 19  | .   | 5046 | .    | .   |
| 162 | Guadeloupe              | 162 | .  | 14 | .  | .   | 138 | 10  | 1    | 405  | 35  |
| 163 | Libya                   | 156 | .  | 5  | .  | 52  | 59  | .   | 23   | 1    | .   |
| 164 | Guyana                  | 153 | .  | 12 | .  | 70  | 71  | 2   | 196  | 15   | .   |
| 165 | Brunei                  | 141 | .  | 2  | .  | 136 | 1   | 1   | 323  | 5    | .   |
| 166 | CaymanIslands           | 141 | .  | 1  | .  | .   | 68  | 72  | .    | 2148 | 15  |
| 167 | Bermuda                 | 140 | .  | 9  | .  | 82  | 39  | 2   | 2247 | 144  | .   |
| 168 | Cambodia                | 125 | .  | .  | .  | 123 | 2   | 1   | 7    | .    | .   |
| 169 | Syria                   | 122 | .  | 5  | .  | 46  | 71  | .   | 7    | 0    | .   |
| 170 | TrinidadandTobago       | 117 | .  | 8  | .  | .   | 108 | 1   | .    | 84   | 6   |
| 171 | Comoros                 | 106 | .  | 2  | .  | 26  | 78  | .   | 122  | 2    | .   |
| 172 | Bahamas                 | 102 | .  | 11 | .  | 48  | 43  | 1   | 260  | 28   | .   |
| 173 | Aruba                   | 101 | .  | 3  | .  | 88  | 0   | .   | 946  | 28   | .   |
| 174 | Monaco                  | 89  | .  | 4  | .  | 83  | 5   | 1   | 2524 | 102  | .   |
| 175 | Barbados                | 82  | .  | 7  | .  | 76  | 9   | 1   | 320  | 24   | .   |
| 176 | Angola                  | 86  | .  | 4  | .  | 18  | 64  | 1   | 3    | 0    | .   |
| 177 | Liechtenstein           | 82  | .  | 1  | .  | .   | 55  | 26  | .    | 2151 | 26  |
| 178 | SintMaarten             | 77  | .  | 15 | .  | .   | 60  | 2   | 1    | 1798 | 350 |
| 179 | Rurundi                 | 63  | .  | 1  | .  | 33  | 29  | .   | 5    | 0    | .   |
| 180 | FrenchPolynesia         | 60  | .  | .  | .  | .   | 60  | 0   | .    | 214  | .   |
| 181 | Nacao                   | 45  | .  | .  | .  | 45  | 0   | .   | 69   | .    | .   |
| 182 | Bhutan                  | 43  | .  | .  | .  | 6   | 37  | .   | 56   | .    | .   |
| 183 | SaintMartin             | 41  | .  | 3  | .  | 33  | 5   | 1   | 1062 | 78   | .   |
| 184 | Eritrea                 | 39  | .  | .  | .  | 39  | 0   | .   | 11   | .    | .   |
| 185 | Botswana                | 38  | 3  | 1  | .  | 20  | 17  | .   | 16   | 0    | .   |
| 186 | AntiguaandBarbuda       | 26  | .  | .  | 3  | .   | 19  | 4   | 1    | 260  | 31  |
| 187 | St.VincentandGrenadines | 26  | .  | .  | .  | .   | .   | 15  | 11   | .    | 234 |
| 188 | Gambia                  | 25  | .  | 1  | .  | 20  | 4   | .   | 10   | 0    | .   |

|     |                        |    |    |   |   |   |    |    |   |       |      |    |
|-----|------------------------|----|----|---|---|---|----|----|---|-------|------|----|
| 188 | Namibia                | 25 | 1  | . | . | . | 16 | 9  | . | 10    | .    | .  |
| 189 | Timor-Leste            | 24 | .  | . | . | . | 24 | 0  | . | 18    | .    | .  |
| 191 | Suriname               | 23 | .  | 1 | . | . | 9  | 13 | . | 39    | 2    | .  |
| 192 | Grenada                | 23 | .  | . | . | . | 18 | 5  | 2 | 204   | .    | .  |
| 193 | NewCaledonia           | 20 | 1  | . | . | . | 18 | 2  | . | 70    | .    | .  |
| 194 | Curaçao                | 19 | .  | 1 | . | . | 14 | 4  | . | 116   | 6    | .  |
| 195 | Laos                   | 19 | .  | . | . | . | 16 | 3  | . | 3     | .    | .  |
| 196 | Belize                 | 18 | .  | 2 | . | . | 16 | 0  | . | 45    | 5    | .  |
| 197 | Fiji                   | 18 | .  | . | . | . | 15 | 3  | . | 29    | .    | .  |
| 198 | SaintLucia             | 18 | .  | . | . | . | 18 | 0  | . | 98    | .    | .  |
| 199 | Dominica               | 16 | .  | . | . | . | 16 | 0  | . | 222   | .    | .  |
| 200 | SaintKittsandNevis     | 15 | .  | . | . | . | .  | 15 | 0 | .     | 262  | .  |
| 201 | FalklandIslands        | 13 | 13 | . | . | . | .  | 13 | 0 | .     | 3746 | .  |
| 202 | Greenland              | 13 | .  | . | . | . | 11 | 2  | . | 229   | .    | .  |
| 203 | TurksandCaicos         | 12 | .  | . | 1 | . | .  | 11 | 0 | .     | 310  | 20 |
| 204 | VaticanCity            | 12 | .  | . | . | . | 2  | 10 | . | 14981 | .    | .  |
| 205 | Montserrat             | 11 | .  | 1 | . | . | 10 | 0  | . | 2204  | 200  | .  |
| 208 | Seychelles             | 11 | .  | . | . | . | 11 | 0  | . | 112   | .    | .  |
| 207 | MSZaandam              | 9  | .  | 2 | . | . | .  | 7  | . | .     | .    | .  |
| 209 | WesternSahara          | 9  | .  | 1 | . | . | 5  | 2  | . | 15    | 2    | .  |
| 209 | BritishVirginIslands   | 8  | .  | . | 1 | . | .  | 7  | 0 | .     | 265  | 33 |
| 210 | PapuaNewGuinea         | 8  | .  | . | . | . | 8  | 0  | . | 1     | .    | .  |
| 211 | CaribbeanNetherlands   | 7  | .  | . | . | . | .  | 7  | 0 | .     | 267  | .  |
| 212 | St.Barth               | 6  | .  | . | . | . | 6  | 0  | . | 608   | .    | .  |
| 213 | Anguilla               | 3  | .  | . | . | . | 3  | 0  | . | 200   | .    | .  |
| 214 | Lesotho                | 2  | .  | . | . | 1 | 1  | 1  | . | 1     | .    | .  |
| 215 | SaintPierreandMiquelon | 1  | .  | . | . | . | .  | 1  | 0 | .     | 173  | .  |

```
run;
```

```
proc means data=corona;
run;
```

```
proc sort data=crop;
by element;
```

```
proc sort data=food;
by country;
run;
```

```
proc sort data=crop;
by country;
run;
```

```
data pig;
set food;
if element='Pigmeat' ;
keep country quantity;
run;
```

```
data pig2;
set pig;
rename quantity=pig;
run;
```

```
data bov;
set food;
if element="BovineMeat";
keep country quantity;
run;
```

```
data bov2;
set bov;
rename quantity=bov;
run;
proc means data=bov2;
run;
```

```
data che;
set food;
if element="Cheese";
keep country quantity;
run;
```

```
data che2;
set che;
rename quantity=che;
run;
proc means data=che2;
run;
```

```
data cre;
set food;
if element="Cream";
keep country quantity;
run;
data cre2;
set cre;
rename quantity=cre;
run;
```

```
data egg;
set food;
if element="Eggs";
keep country quantity;
run;
data egg2;
set egg;
rename quantity=Egg;
run;
proc means data=egg2;
run;
```

```
data fre; /* freshwater fish */
set food;
if element="Freshwat";
keep country quantity;
run;
data fre2;
set fre;
rename quantity=freshf;
run;
```

```
data hon; /* Honey */
set food;
if element="Honey";
keep country quantity;
run;
data hon2;
set hon;
rename quantity=hon;
run;
```

```
data mil;
set food;
if element="MilkWhol";
keep country quantity;
run;
data mil2;
set mil;
rename quantity=milk;
run;
```

```
data pou;
set food;
if element="PoultryM";
keep country quantity;
run;
data pou2;
set pou;
rename quantity=pou1;
run;
```

```
data dem;
set food;
if element="Demersal";
keep country quantity;
run;
data dem2;
set dem;
rename quantity=demer;
run;
```



```
data cep;
set food;
if element="Cephalop";
keep country quantity;
run;
data cep2;
set cep;
rename quantity=ceph;
run;

data but;
set food;
if element="Butter0h";
keep country quantity;
run;
data but2;
set but;
rename quantity=butg;
run;

data mar;          /* Marine Fish */
set food;
if element="MarineFi";
keep country quantity;
rename quantity=marf;
run;

data aqp;          /* aquatic plants */
set food;
if element="AquaticP";
keep country quantity;
rename quantity=aqp;
run;

data bev;
set crop;
if element="Beverage";
keep country quantity;
rename quantity=bev;
run;

data rice;
set crop;
if element="Rice011";
keep country quantity;
run;
data rice2;
set rice;
rename quantity=rice;
run;
```

```

data pot;
set drop;
if element="Potatoes" ;
keep country quantity;
rename quantity=potato;
run;

data maiz;
set drop;
if element="Maizeand" ;
keep country quantity;
rename quantity=maiz;
run;

data wheat;
set drop;
if element="Wheatand" ;
keep country quantity;
rename quantity=wheat;
run;

data wine;
set drop;
if element="Wine" ;
keep country quantity;
rename quantity=wine;
run;

proc sort data=corona;
by country;
run;

data all;
merge pig2 bov2 che2 cre2 egg2 fra2 hor2 all2 pou2 dem2 cep2 but2 ear wq          bev rice2 pat maiz wh
by country;
run;
data all2;
merge all corona;
by country;
run;

data all3;
set all2;
logtot=log(TotalCases+1);
logtin=log(TotCasesInpop+1);
logpig=log(pig+1);
logbov=log(bov+1);
logche=log(che+1);

```

```

logore=log(ore+1);
logegg=log(egg+1);
logfreshf=log(freshf+1);
loghon=log(hon+1);
logmilk=log(milk+1);
logpoul=log(poul+1);
logdeme=log(deme+1);
logceph=log(ceph+1);
logbutg=log(butg+1);
logmarf=log(marf+1);
logagp=log(agp+1);
logbev=log(bev+1);
logrice=log(rice+1);
logpotato=log(potato+1);
logmaiz=log(maiz+1);
logheat=log(heat+1);
logeine=log(eine+1);
run;

/*
proc print data=all3;
var country totalcases logtot pig logpig;
run;
*/

proc univariate data=all3 normal plots;histogram;
var logtot totalcases pig logpig che logche bev logbev ore logore egg logegg ;
run;

proc means data=all3;
run;

proc freq data=all3;
table country;
run;

/*
proc freq data=all3;
table country;
run;
*/

/***** CORR *****/
title " corr ";
proc corr data=all3 pearson spearman ;
var Totalcases logtot ;
with logpig logbev logche logore logegg logfreshf loghon logmilk logpoul

```

```
logdener logceph logbutg logearf logpap
logbev logrice logpotato logmaiz logeheat logvine ;
```

```
run;
```

```
/*
***** REG *****
*/
```

```
/*
```

```
*/
```

```
title " logtot model logtransformation ";
proc reg data=all3 ;
  model logtot = logpig loghov logche logera logegg logfreshf loghon logmilk logpoul
                logdener logceph logbutg logearf logpap
                logrice logpotato logmaiz logeheat
                / selection=stepwise slentry=0.10 slstay=0.01 vif ;
```

```
run;
```

```
quit;
```

```
/*
***** LASSO *****
*/
```

```
ods graphics on/ labelmax=400;
title " logtot lasso ";
proc glmselect data=all3 plots=all ;
  model logtot = pig hov che era egg freshf hon milk poul
                dener ceph butg earf eqp
                rice potato maiz wheat / selection=lasso (choose=rcp steps=100
```

```
run;
```

```
ods rtf close;
```

```
*/
```

```
ods graphics on/ labelmax=400;
```

```

title " tot arithm lasso ";
proc glselect data=all3 plots=all ;
  model logtot =logpig logbov logche logore logegg logfreshf loghon logmilk logpoul
              logdemea logceph logbutg logearf logcap
              logrice logpotato logmaiz logwheat / selection=lasso (choose =cp st
run;

```

```
ods rtf close;
```

```

/*****
PCA
*****/

```

```
/*
```

```
ods graphics on;
```

```
proc princomp data=all3 n=3 plots (ncomp=3)=pattern;
```

```
  id country;
```

```

  var logtot logpig logbov logche logore logegg logfreshf loghon logmilk logpou
      logdemea logceph logbutg logearf logcap
      logbev logrice logpotato logmaiz logwheat logwine ;

```

```
title ' logtot logarithmic PCA of Food Consumption and COVID-19 Parameters ';
```

```
run;
```

```
ods rtf close;
```

```
*/
```

```
ods graphics on;
```

```
proc princomp data=all3 n=6 plots (ncomp=3)=pattern;
```

```
  id country;
```

```

  var totalcases pig bov che cre egg freshf hon milk poul
      deer butg
      rice potato maiz wheat;

```

```
;
```

```

title ' model 2  PCA of Food Consumption and COVID-19 Parameters  ';

run;
ods rtf close;

/***** Bayesian *****/

ods graphics on ; title ' Bayesian Logarithmic ';
proc genmod data=all3;
  model logtot =logpig logbev logche logcre logegg logfreshf loghon logmilk logpaul
              logdeme logceph logbutg logmarf logpap
              logbev logrice logpotato logpsir logheat logeire ;
  bayes seed=12345 OutPost=PostSurg;

run;

ods rtf close;

/**** Statements compute the estimate of the probability ofbeing positive ****/

data Prob;
  set PostSurg;
  pig2 = (logpig > 0);
  bev2=(logbev >0);

  che2=(logche >0);
  cre2=(logcre >0);
  egg2=(logegg>0);
  fresh2=(logfreshf>0);  freshf2=(logfreshf<0);
  hon2=(loghon>0);
  milk2=(logmilk >0);  paul2=(logpaul>0);  deme2=(logdeme>0);
  cep2=(logceph>0);
  but2=(logbutg>0);

  mar2=(logmarf>0);  marf2=(logmarf<0);
  pap2=(logpap>0);
  bev2=(logbev >0);
  rice2=(logrice>0);
  rice2=(logrice<0);

  potato2=(logpotato>0);

```

```

maiz2=(logmaiz>0);
maiz2=(logmaiz <0);
wheat2=(logwheat>0);
wine2=(logwine>0);
run;

title " logtot logarithmic freshfn2=(freshf<0) ";
proc means data = Prob(kexp=pig2
      bov2 ohe2 ore2 egg2 freshf2 freshfn2 hon2 milk2 pou2 demer2
      cepn2 butg2 marf2 marfn2 marfe2 aqp2
      bev2 rice2 ricen2 potato2 maiz2 maizn2 wheat2 wine2 ) n mean;
run;

quit;

/*****
/*      Animal And Crop Production with COVID 19   1 June 2020      */
/*      *****/
/*****/

data animal;
input country $      spe$      year      unit$      value ;
cards;
Afghanistan  Asses  2018  Head  1354718
Afghanistan  Camels  2018  Head  171832
Afghanistan  Cattle  2018  Head  5022806
Afghanistan  Chickens  2018  1000Head  14152
Afghanistan  Goats  2018  Head  7749061
Afghanistan  Horses  2018  Head  179819
Afghanistan  Mules  2018  Head  23811
Afghanistan  Sheep  2018  Head  14023669
Albania  Asses  2018  Head  56000
Albania  Beehives  2018  No  285455
Albania  Buffaloes  2018  Head  95
Albania  Cattle  2018  Head  467318
Albania  Chickens  2018  1000Head  7272
Albania  Ducks  2018  1000Head  .
Albania  Geeseandguineafowls  2018  1000Head  .
Albania  Goats  2018  Head  917166
Albania  Horses  2018  Head  31905
Albania  Mules  2018  Head  .
Albania  Pigs  2018  Head  184133
Albania  Sheep  2018  Head  1863837
Albania  Turkeys  2018  1000Head  493
Algeria  Asses  2018  Head  84051
Algeria  Beehives  2018  No  411713
Algeria  Camels  2018  Head  417322
Algeria  Cattle  2018  Head  1813192
Algeria  Chickens  2018  1000Head  136063

```

|                   |                     |      |          |          |      |
|-------------------|---------------------|------|----------|----------|------|
| Algeria           | Ducks               | 2018 | 1000Head | 54       |      |
| Algeria           | Geeseandguineafowls | 2018 | 1000Head |          | 37   |
| Algeria           | Goats               | 2018 | Head     | 4904254  |      |
| Algeria           | Horses              | 2018 | Head     | 48358    |      |
| Algeria           | Mules               | 2018 | Head     | 16808    |      |
| Algeria           | Pigs                | 2018 | Head     | 4703     |      |
| Algeria           | Rabbitsandhares     | 2018 | 1000Head |          | 1694 |
| Algeria           | Sheep               | 2018 | Head     | 28953330 |      |
| Algeria           | Turkeys             | 2018 | 1000Head | 98       |      |
| AmericanSamoa     | Cattle              | 2018 | Head     | 111      |      |
| AmericanSamoa     | Chickens            | 2018 | 1000Head |          | 41   |
| AmericanSamoa     | Pigs                | 2018 | Head     | 10500    |      |
| Angola            | Asses               | 2018 | Head     | 4443     |      |
| Angola            | Beehives            | 2018 | No       | 1153818  |      |
| Angola            | Cattle              | 2018 | Head     | 5044019  |      |
| Angola            | Chickens            | 2018 | 1000head | 33692    |      |
| Angola            | Goats               | 2018 | Head     | 4599013  |      |
| Angola            | Horses              | 2018 | Head     | 1015     |      |
| Angola            | Pigs                | 2018 | Head     | 2878728  |      |
| Angola            | Sheep               | 2018 | Head     | 1170988  |      |
| AntiguaandBarbuda | Asses               | 2018 | Head     | 1727     |      |
| AntiguaandBarbuda | Cattle              | 2018 | Head     | 4710     |      |
| AntiguaandBarbuda | Chickens            | 2018 | 1000head |          | 159  |
| AntiguaandBarbuda | Goats               | 2018 | Head     | 26969    |      |
| AntiguaandBarbuda | Horses              | 2018 | Head     | 496      |      |
| AntiguaandBarbuda | Pigs                | 2018 | Head     | 4989     |      |
| AntiguaandBarbuda | Sheep               | 2018 | Head     | 13861    |      |
| Argentina         | Asses               | 2018 | Head     | 92604    |      |
| Argentina         | Beehives            | 2018 | No       | 3020370  |      |
| Argentina         | Cattle              | 2018 | Head     | 53928990 |      |
| Argentina         | Chickens            | 2018 | 1000Head | 113600   |      |
| Argentina         | Ducks               | 2018 | 1000Head | 2588     |      |
| Argentina         | Geeseandguineafowls | 2018 | 1000Head |          | 172  |
| Argentina         | Goats               | 2018 | Head     | 4587479  |      |
| Argentina         | Horses              | 2018 | Head     | 2611240  |      |
| Argentina         | Mules               | 2018 | Head     | 185735   |      |
| Argentina         | Pigs                | 2018 | Head     | 5049837  |      |
| Argentina         | Rabbitsandhares     | 2018 | 1000Head |          | 1173 |
| Argentina         | Sheep               | 2018 | Head     | 14339908 |      |
| Argentina         | Turkeys             | 2018 | 1000Head | 3014     |      |
| Armenia           | Asses               | 2018 | Head     | 1758     |      |
| Armenia           | Beehives            | 2018 | No       | 236242   |      |
| Armenia           | Buffaloes           | 2018 | Head     | 717      |      |
| Armenia           | Cattle              | 2018 | Head     | 590585   |      |
| Armenia           | Chickens            | 2018 | 1000Head | 4406     |      |
| Armenia           | Goats               | 2018 | Head     | 22081    |      |
| Armenia           | Horses              | 2018 | Head     | 10049    |      |
| Armenia           | Mules               | 2018 | Head     | 25       |      |
| Armenia           | Pigs                | 2018 | Head     | 166757   |      |
| Armenia           | Rabbitsandhares     | 2018 | 1000Head |          | 28   |
| Armenia           | Sheep               | 2018 | Head     | 637978   |      |
| Armenia           | Turkeys             | 2018 | 1000Head | 171      |      |
| Aruba             | Chickens            | 2018 | 1000Head | .        |      |
| Aruba             | Goats               | 2018 | Head     | .        |      |
| Aruba             | Horses              | 2018 | Head     | .        |      |
| Aruba             | Pigs                | 2018 | Head     | .        |      |



|            |                     |      |          |          |  |
|------------|---------------------|------|----------|----------|--|
| Aruba      | Sheep               | 2018 | Head     | .        |  |
| Australia  | Asses               | 2018 | Head     | 1919     |  |
| Australia  | Beehives            | 2018 | No       | 374697   |  |
| Australia  | Buffaloes           | 2018 | Head     | .        |  |
| Australia  | Cattle              | 2018 | Head     | 29305734 |  |
| Australia  | Chickens            | 2018 | 1000Head | 98410    |  |
| Australia  | Ducks               | 2018 | 1000Head | 1346     |  |
| Australia  | Goats               | 2018 | Head     | 3631828  |  |
| Australia  | Horses              | 2018 | Head     | 295078   |  |
| Australia  | Pigs                | 2018 | Head     | 2634039  |  |
| Australia  | Sheep               | 2018 | Head     | 70067316 |  |
| Australia  | Turkeys             | 2018 | 1000Head | 1188     |  |
| Austria    | Beehives            | 2018 | No       | 572900   |  |
| Austria    | Cattle              | 2018 | Head     | 1943478  |  |
| Austria    | Chickens            | 2018 | 1000Head | 16867    |  |
| Austria    | Ducks               | 2018 | 1000Head | 57       |  |
| Austria    | Geeseandguineafowls | 2018 | 1000Head | 28       |  |
| Austria    | Goats               | 2018 | Head     | 91134    |  |
| Austria    | Horses              | 2018 | Head     | 92979    |  |
| Austria    | Pigs                | 2018 | Head     | 2820082  |  |
| Austria    | Rabbitsandhares     | 2018 | 1000Head | 204      |  |
| Austria    | Sheep               | 2018 | Head     | 401480   |  |
| Austria    | Turkeys             | 2018 | 1000Head | 593      |  |
| Azerbaijan | Asses               | 2018 | Head     | 26040    |  |
| Azerbaijan | Beehives            | 2018 | No       | 500280   |  |
| Azerbaijan | Buffaloes           | 2018 | Head     | 176195   |  |
| Azerbaijan | Camels              | 2018 | Head     | 239      |  |
| Azerbaijan | Cattle              | 2018 | Head     | 2482627  |  |
| Azerbaijan | Chickens            | 2018 | 1000Head | 30498    |  |
| Azerbaijan | Goats               | 2018 | Head     | 622426   |  |
| Azerbaijan | Horses              | 2018 | Head     | 65211    |  |
| Azerbaijan | Sheep               | 2018 | Head     | 53       |  |
| Azerbaijan | Pigs                | 2018 | Head     | 5485     |  |
| Azerbaijan | Sheep               | 2018 | Head     | 7681674  |  |
| Azerbaijan | Turkeys             | 2018 | 1000Head | 5140     |  |
| Bahamas    | Cattle              | 2018 | Head     | 739      |  |
| Bahamas    | Chickens            | 2018 | 1000Head | 3187     |  |
| Bahamas    | Goats               | 2018 | Head     | 14990    |  |
| Bahamas    | Horses              | 2018 | Head     | .        |  |
| Bahamas    | Pigs                | 2018 | Head     | 5012     |  |
| Bahamas    | Sheep               | 2018 | Head     | 6729     |  |
| Bahrain    | Asses               | 2018 | Head     | .        |  |
| Bahrain    | Camels              | 2018 | Head     | 1092     |  |
| Bahrain    | Cattle              | 2018 | Head     | 9944     |  |
| Bahrain    | Chickens            | 2018 | 1000Head | 542      |  |
| Bahrain    | Goats               | 2018 | Head     | 17350    |  |
| Bahrain    | Sheep               | 2018 | Head     | 38650    |  |
| Bangladesh | Buffaloes           | 2018 | Head     | 1486000  |  |
| Bangladesh | Cattle              | 2018 | Head     | 24086000 |  |
| Bangladesh | Chickens            | 2018 | 1000Head | 282145   |  |
| Bangladesh | Ducks               | 2018 | 1000Head | 5583     |  |
| Bangladesh | Goats               | 2018 | Head     | 60074080 |  |
| Bangladesh | Sheep               | 2018 | Head     | 2274116  |  |
| Barbados   | Asses               | 2018 | Head     | 2286     |  |
| Barbados   | Cattle              | 2018 | Head     | 10767    |  |
| Barbados   | Chickens            | 2018 | 1000Head | 3690     |  |

|          |                     |      |          |         |  |
|----------|---------------------|------|----------|---------|--|
| Barbados | Goats               | 2018 | Head     | 5611    |  |
| Barbados | Horses              | 2018 | Head     | 1295    |  |
| Barbados | Mules               | 2018 | Head     | 2000    |  |
| Barbados | Pigs                | 2018 | Head     | 23405   |  |
| Barbados | Sheep               | 2018 | Head     | 13802   |  |
| Barbados | Turkeys             | 2018 | 1000Head | 74      |  |
| Belarus  | Asses               | 2018 | Head     | 9028    |  |
| Belarus  | Beehives            | 2018 | No       | 207     |  |
| Belarus  | Cattle              | 2018 | Head     | 4341509 |  |
| Belarus  | Chickens            | 2018 | 1000Head | 48061   |  |
| Belarus  | Ducks               | 2018 | 1000Head | 1787    |  |
| Belarus  | Goats               | 2018 | Head     | 63300   |  |
| Belarus  | Horses              | 2018 | Head     | 43500   |  |
| Belarus  | Pigs                | 2018 | Head     | 2840600 |  |
| Belarus  | Rabbitsandhares     | 2018 | 1000Head | 301     |  |
| Belarus  | Sheep               | 2018 | Head     | 87800   |  |
| Belarus  | Turkeys             | 2018 | 1000head | 1225    |  |
| Belgium  | Asses               | 2018 | Head     | 2       |  |
| Belgium  | Beehives            | 2018 | No       | 33734   |  |
| Belgium  | Cattle              | 2018 | Head     | 2398093 |  |
| Belgium  | Chickens            | 2018 | 1000Head | 32327   |  |
| Belgium  | Ducks               | 2018 | 1000Head | 202     |  |
| Belgium  | Geeseandguineafowls | 2018 | 1000Head | 4       |  |
| Belgium  | Goats               | 2018 | Head     | 90404   |  |
| Belgium  | Horses              | 2018 | Head     | 33656   |  |
| Belgium  | Pigs                | 2018 | Head     | 6209131 |  |
| Belgium  | Rabbitsandhares     | 2018 | 1000Head | 184     |  |
| Belgium  | Sheep               | 2018 | Head     | 86672   |  |
| Belgium  | Turkeys             | 2018 | 1000Head | 221     |  |
| Belize   | Beehives            | 2018 | No       | 1084    |  |
| Belize   | Cattle              | 2018 | Head     | 117375  |  |
| Belize   | Chickens            | 2018 | 1000Head | 1632    |  |
| Belize   | Ducks               | 2018 | 1000Head | 13      |  |
| Belize   | Goats               | 2018 | Head     | 191     |  |
| Belize   | Horses              | 2018 | Head     | 6033    |  |
| Belize   | Mules               | 2018 | Head     | 4647    |  |
| Belize   | Pigs                | 2018 | Head     | 23374   |  |
| Belize   | Sheep               | 2018 | Head     | 15751   |  |
| Belize   | Turkeys             | 2018 | 1000Head | 52      |  |
| Benin    | Asses               | 2018 | Head     | 625     |  |
| Benin    | Cattle              | 2018 | Head     | 2462000 |  |
| Benin    | Chickens            | 2018 | 1000Head | 21304   |  |
| Benin    | Goats               | 2018 | Head     | 1821000 |  |
| Benin    | Horses              | 2018 | Head     | 1039    |  |
| Benin    | Pigs                | 2018 | Head     | 504000  |  |
| Benin    | Sheep               | 2018 | Head     | 954000  |  |
| Bermuda  | Asses               | 2018 | Head     | 6       |  |
| Bermuda  | Cattle              | 2018 | Head     | 640     |  |
| Bermuda  | Chickens            | 2018 | 1000Head | 52      |  |
| Bermuda  | Ducks               | 2018 | 1000Head | .       |  |
| Bermuda  | Goats               | 2018 | Head     | 371     |  |
| Bermuda  | Horses              | 2018 | Head     | 1025    |  |
| Bermuda  | Mules               | 2018 | Head     | 1       |  |
| Bermuda  | Pigs                | 2018 | Head     | 609     |  |
| Bermuda  | Asses               | 2018 | Head     | 17969   |  |
| Bhutan   | Buffaloes           | 2018 | Head     | 531     |  |

|                      |                     |      |          |           |         |
|----------------------|---------------------|------|----------|-----------|---------|
| Bhutan               | Cattle              | 2018 | Head     | 298601    |         |
| Bhutan               | Chickens            | 2018 | 1000Head | 830       |         |
| Bhutan               | Goats               | 2018 | Head     | 43639     |         |
| Bhutan               | Horses              | 2018 | Head     | 13684     |         |
| Bhutan               | Mules               | 2018 | Head     | 4754      |         |
| Bhutan               | Pigs                | 2018 | Head     | 21810     |         |
| Bhutan               | Sheep               | 2018 | Head     | 9461      |         |
| Bolivia              | Asses               | 2018 | Head     | 634969    |         |
| Bolivia              | Beehives            | 2018 | No       | .         |         |
| Bolivia              | Camelids,other      | 2018 | Head     |           | 3075742 |
| Bolivia              | Cattle              | 2018 | Head     | 9658003   |         |
| Bolivia              | Chickens            | 2018 | 1000Head | 227468    |         |
| Bolivia              | Ducks               | 2018 | 1000Head | 676       |         |
| Bolivia              | Goats               | 2018 | Head     | 2228000   |         |
| Bolivia              | Horses              | 2018 | Head     | 506512    |         |
| Bolivia              | Mules               | 2018 | Head     | 82672     |         |
| Bolivia              | Pigs                | 2018 | Head     | 2998000   |         |
| Bolivia              | Rabbitsandhares     | 2018 | 1000Head |           | 281     |
| Bolivia              | Rodents,other       | 2018 | 1000Head |           | 426     |
| Bolivia              | Sheep               | 2018 | Head     | 7493000   |         |
| Bolivia              | Turkeys             | 2018 | 1000Head | 157       |         |
| BosniaandHerzegovina | Beehives            | 2018 | No       |           | 402630  |
| BosniaandHerzegovina | Cattle              | 2018 | Head     |           | 438006  |
| BosniaandHerzegovina | Chickens            | 2018 | 1000Head |           | 16229   |
| BosniaandHerzegovina | Ducks               | 2018 | 1000Head |           | 59      |
| BosniaandHerzegovina | GeeseandguineaFowls | 2018 | 1000Head |           | 30      |
| BosniaandHerzegovina | Goats               | 2018 | Head     |           | 73038   |
| BosniaandHerzegovina | Horses              | 2018 | Head     |           | 14402   |
| BosniaandHerzegovina | Pigs                | 2018 | Head     |           | 541526  |
| BosniaandHerzegovina | Rabbitsandhares     | 2018 | 1000Head |           | 6       |
| BosniaandHerzegovina | Sheep               | 2018 | Head     |           | 1012546 |
| BosniaandHerzegovina | Turkeys             | 2018 | 1000Head |           | 100     |
| Botswana             | Asses               | 2018 | Head     | 172672    |         |
| Botswana             | Cattle              | 2018 | Head     | 1446180   |         |
| Botswana             | Chickens            | 2018 | 1000Head | 913       |         |
| Botswana             | Goats               | 2018 | Head     | 1327529   |         |
| Botswana             | Horses              | 2018 | Head     | 16166     |         |
| Botswana             | Mules               | 2018 | Head     | 3097      |         |
| Botswana             | Pigs                | 2018 | Head     | 4003      |         |
| Botswana             | Rabbitsandhares     | 2018 | 1000Head |           | 130     |
| Botswana             | Sheep               | 2018 | Head     | 923030    |         |
| Brazil               | Asses               | 2018 | Head     | 622256    |         |
| Brazil               | Beehives            | 2018 | No       | 1017666   |         |
| Brazil               | Buffaloes           | 2018 | Head     | 1390266   |         |
| Brazil               | Cattle              | 2018 | Head     | 213523056 |         |
| Brazil               | Chickens            | 2018 | 1000Head | 1468262   |         |
| Brazil               | Ducks               | 2018 | 1000Head | 3467      |         |
| Brazil               | Goats               | 2018 | Head     | 10696664  |         |
| Brazil               | Horses              | 2018 | Head     | 6751798   |         |
| Brazil               | Mules               | 2018 | Head     | 1252029   |         |
| Brazil               | Pigs                | 2018 | Head     | 4144364   |         |
| Brazil               | Rabbitsandhares     | 2018 | 1000Head |           | 166     |
| Brazil               | Sheep               | 2018 | Head     | 18948934  |         |
| Brazil               | Turkeys             | 2018 | 1000Head | 33781     |         |
| BritishVirginIslands | Asses               | 2018 | Head     |           | 300     |
| BritishVirginIslands | Cattle              | 2018 | Head     |           | 2400    |

|                      |                     |      |          |          |  |
|----------------------|---------------------|------|----------|----------|--|
| BritishVirginIslands | Goats               | 2018 | Head     | 10000    |  |
| BritishVirginIslands | Horses              | 2018 | Head     | 100      |  |
| BritishVirginIslands | Mules               | 2018 | Head     | 100      |  |
| BritishVirginIslands | Pigs                | 2018 | Head     | 1500     |  |
| BritishVirginIslands | Sheep               | 2018 | Head     | 6100     |  |
| BruneiDarussalam     | Buffaloes           | 2018 | Head     | 2519     |  |
| BruneiDarussalam     | Cattle              | 2018 | Head     | 681      |  |
| BruneiDarussalam     | Chickens            | 2018 | 1000Head | 16115    |  |
| BruneiDarussalam     | Ducks               | 2018 | 1000Head | 237      |  |
| BruneiDarussalam     | Goats               | 2018 | Head     | 6102     |  |
| BruneiDarussalam     | Pigs                | 2018 | Head     | 1236     |  |
| BruneiDarussalam     | Sheep               | 2018 | Head     | 4622     |  |
| Bulgaria             | Asses               | 2018 | Head     | 19000    |  |
| Bulgaria             | Beehives            | 2018 | No       | 765772   |  |
| Bulgaria             | Buffaloes           | 2018 | Head     | 12809    |  |
| Bulgaria             | Cattle              | 2018 | Head     | 540115   |  |
| Bulgaria             | Chickens            | 2018 | 1000head | 12984    |  |
| Bulgaria             | Ducks               | 2018 | 1000Head | 1666     |  |
| Bulgaria             | Geeseandguineafowls | 2018 | 1000head | 16       |  |
| Bulgaria             | Goats               | 2018 | Head     | 266967   |  |
| Bulgaria             | Horses              | 2018 | Head     | 62229    |  |
| Bulgaria             | Mules               | 2018 | Head     | 1411     |  |
| Bulgaria             | Pigs                | 2018 | Head     | 503154   |  |
| Bulgaria             | Rabbitsandhares     | 2018 | 1000Head | 215      |  |
| Bulgaria             | Sheep               | 2018 | Head     | 1316784  |  |
| Bulgaria             | Turkeys             | 2018 | 1000Head | 30       |  |
| BurkinaFaso          | Asses               | 2018 | Head     | 1230042  |  |
| BurkinaFaso          | Camels              | 2018 | Head     | 10762    |  |
| BurkinaFaso          | Cattle              | 2018 | Head     | 9788225  |  |
| BurkinaFaso          | Chickens            | 2018 | 1000Head | 42459    |  |
| BurkinaFaso          | Goats               | 2018 | Head     | 15580023 |  |
| BurkinaFaso          | Horses              | 2018 | Head     | 41067    |  |
| BurkinaFaso          | Pigs                | 2018 | Head     | 2537901  |  |
| BurkinaFaso          | Sheep               | 2018 | Head     | 10394652 |  |
| Burundi              | Beehives            | 2018 | No       | 217927   |  |
| Burundi              | Cattle              | 2018 | Head     | 1110936  |  |
| Burundi              | Chickens            | 2018 | 1000Head | 2650     |  |
| Burundi              | Goats               | 2018 | Head     | 3249627  |  |
| Burundi              | Pigs                | 2018 | Head     | 774688   |  |
| Burundi              | Rabbitsandhares     | 2018 | 1000Head | 515      |  |
| Burundi              | Sheep               | 2018 | Head     | 649606   |  |
| Burundi              | Turkeys             | 2018 | 1000Head | .        |  |
| CaboVerde            | Asses               | 2018 | Head     | 13889    |  |
| CaboVerde            | Cattle              | 2018 | Head     | 29668    |  |
| CaboVerde            | Chickens            | 2018 | 1000Head | 1000     |  |
| CaboVerde            | Goats               | 2018 | Head     | 107632   |  |
| CaboVerde            | Horses              | 2018 | Head     | 566      |  |
| CaboVerde            | Mules               | 2018 | Head     | 1901     |  |
| CaboVerde            | Pigs                | 2018 | Head     | 66806    |  |
| CaboVerde            | Sheep               | 2018 | Head     | 12620    |  |
| Camboia              | Buffaloes           | 2018 | Head     | 651945   |  |
| Camboia              | Cattle              | 2018 | Head     | 2866363  |  |
| Camboia              | Chickens            | 2018 | 1000Head | 13200    |  |
| Camboia              | Ducks               | 2018 | 1000Head | 8867     |  |
| Camboia              | Horses              | 2018 | Head     | 30619    |  |
| Camboia              | Pigs                | 2018 | Head     | 1760952  |  |

|                        |                     |      |          |          |  |
|------------------------|---------------------|------|----------|----------|--|
| Carenoon               | Asses               | 2018 | Head     | 39987    |  |
| Carenoon               | Beehives            | 2018 | No       | 317835   |  |
| Carenoon               | Cattle              | 2018 | Head     | 6737585  |  |
| Carenoon               | Chickens            | 2018 | 1000Head | 82718    |  |
| Carenoon               | Goats               | 2018 | Head     | 5484608  |  |
| Carenoon               | Horses              | 2018 | Head     | 20925    |  |
| Carenoon               | Pigs                | 2018 | Head     | 1963365  |  |
| Carenoon               | Rabbitsandhares     | 2018 | 1000Head | 49       |  |
| Carenoon               | Sheep               | 2018 | Head     | 3438274  |  |
| Canada                 | Beehives            | 2018 | No       | 695729   |  |
| Canada                 | Cattle              | 2018 | Head     | 11985000 |  |
| Canada                 | Chickens            | 2018 | 1000Head | 170585   |  |
| Canada                 | Ducks               | 2018 | 1000Head | 1497     |  |
| Canada                 | Geeseandguineafowls | 2018 | 1000Head | 324      |  |
| Canada                 | Goats               | 2018 | Head     | 30015    |  |
| Canada                 | Horses              | 2018 | Head     | 398385   |  |
| Canada                 | Mules               | 2018 | Head     | 4000     |  |
| Canada                 | Pigs                | 2018 | Head     | 14170000 |  |
| Canada                 | Sheep               | 2018 | Head     | 829400   |  |
| Canada                 | Turkeys             | 2018 | 1000Head | 5893     |  |
| Caymanislands          | Cattle              | 2018 | Head     | 2124     |  |
| Caymanislands          | Chickens            | 2018 | 1000Head | 6        |  |
| Caymanislands          | Goats               | 2018 | Head     | 2459     |  |
| Caymanislands          | Pigs                | 2018 | Head     | 1210     |  |
| CentralAfricanRepublic | Asses               | 2018 | Head     | .        |  |
| CentralAfricanRepublic | Beehives            | 2018 | No       | 1679762  |  |
| CentralAfricanRepublic | Cattle              | 2018 | Head     | 4679519  |  |
| CentralAfricanRepublic | Chickens            | 2018 | 1000Head | 7505     |  |
| CentralAfricanRepublic | Ducks               | 2018 | 1000Head | 13       |  |
| CentralAfricanRepublic | Goats               | 2018 | Head     | 6515960  |  |
| CentralAfricanRepublic | Pigs                | 2018 | Head     | 1113870  |  |
| CentralAfricanRepublic | Sheep               | 2018 | Head     | 440366   |  |
| Chad                   | Asses               | 2018 | Head     | 3060235  |  |
| Chad                   | Beehives            | 2018 | No       | 125004   |  |
| Chad                   | Camels              | 2018 | Head     | 7782545  |  |
| Chad                   | Cattle              | 2018 | Head     | 29063152 |  |
| Chad                   | Chickens            | 2018 | 1000Head | 6245     |  |
| Chad                   | Goats               | 2018 | Head     | 36524515 |  |
| Chad                   | Horses              | 2018 | Head     | 445366   |  |
| Chad                   | Pigs                | 2018 | Head     | 110000   |  |
| Chad                   | Sheep               | 2018 | Head     | 33216051 |  |
| Chile                  | Asses               | 2018 | Head     | 15386    |  |
| Chile                  | Beehives            | 2018 | No       | 447140   |  |
| Chile                  | Cattle              | 2018 | Head     | 2999902  |  |
| Chile                  | Chickens            | 2018 | 1000Head | 11026    |  |
| Chile                  | Goats               | 2018 | Head     | 448439   |  |
| Chile                  | Horses              | 2018 | Head     | 295600   |  |
| Chile                  | Mules               | 2018 | Head     | 7004     |  |
| Chile                  | Pigs                | 2018 | Head     | 2608205  |  |
| Chile                  | Sheep               | 2018 | Head     | 3198130  |  |
| Chile                  | Turkeys             | 2018 | 1000Head | 25830    |  |
| China                  | Asses               | 2018 | Head     | 2677900  |  |
| China                  | Beehives            | 2018 | No       | 9173742  |  |
| China                  | Buffaloes           | 2018 | Head     | 27118636 |  |
| China                  | Camels              | 2018 | Head     | 323300   |  |
| China                  | Cattle              | 2018 | Head     | 63417928 |  |

|                        |                     |      |          |           |        |
|------------------------|---------------------|------|----------|-----------|--------|
| China                  | Chickens            | 2018 | 1000Head | 5372559   |        |
| China                  | Ducks               | 2018 | 1000Head | 692691    |        |
| China                  | Geeseandguineafowls | 2018 | 1000Head |           | 312277 |
| China                  | Goats               | 2018 | Head     | 198983129 |        |
| China                  | Horses              | 2018 | Head     | 8438788   |        |
| China                  | Mules               | 2018 | Head     | 811200    |        |
| China                  | Pigeons,otherbirds  | 2018 | 1000Head |           | 6924   |
| China                  | Pigs                | 2018 | Head     | 447175334 |        |
| China                  | Rabbitsandhares     | 2018 | 1000Head |           | 227792 |
| China                  | Sheep               | 2018 | Head     | 164079090 |        |
| China                  | Turkeys             | 2018 | 1000Head | 83        |        |
| Hongkong               | Buffaloes           | 2018 | Head     | 329       |        |
| Hongkong               | Cattle              | 2018 | Head     | 1583      |        |
| Hongkong               | Chickens            | 2018 | 1000Head |           | 1303   |
| Hongkong               | Ducks               | 2018 | 1000Head | 237       |        |
| Hongkong               | Geeseandguineafowls | 2018 | 1000head |           | 0      |
| Hongkong               | Goats               | 2018 | Head     | 696       |        |
| Hongkong               | Horses              | 2018 | Head     | 1531      |        |
| Hongkong               | Pigeons,otherbirds  | 2018 | 1000Head |           | 6924   |
| Hongkong               | Pigs                | 2018 | Head     | 153458    |        |
| Hongkong               | Sheep               | 2018 | Head     | 21        |        |
| Hongkong               | Turkeys             | 2018 | 1000Head | 0         |        |
| China,MacaoSAR         | Chickens            | 2018 | 1000Head |           | 780    |
| China,mainland         | Asses               | 2018 | Head     | 2677630   |        |
| China,mainland         | Beehives            | 2018 | No       | 9048546   |        |
| China,mainland         | Buffaloes           | 2018 | Head     | 27116290  |        |
| China,mainland         | Carels              | 2018 | Head     | 323300    |        |
| China,mainland         | Cattle              | 2018 | Head     | 63271250  |        |
| China,mainland         | Chickens            | 2018 | 1000Head | 5274475   |        |
| China,mainland         | Ducks               | 2018 | 1000Head | 694529    |        |
| China,mainland         | Geeseandguineafowls | 2018 | 1000Head |           | 311415 |
| China,mainland         | Goats               | 2018 | Head     | 138237700 |        |
| China,mainland         | Horses              | 2018 | Head     | 3426400   |        |
| China,mainland         | Mules               | 2018 | Head     | 811200    |        |
| China,mainland         | Pigs                | 2018 | Head     | 441589200 |        |
| China,mainland         | Rabbitsandhares     | 2018 | 1000Head |           | 227731 |
| China,mainland         | Sheep               | 2018 | Head     | 164078900 |        |
| China,TaiwanProvinceof | Beehives            | 2018 | No       | 125196    |        |
| China,TaiwanProvinceof | Buffaloes           | 2018 | Head     | 2057      |        |
| China,TaiwanProvinceof | Cattle              | 2018 | Head     | 143086    |        |
| China,TaiwanProvinceof | Chickens            | 2018 | 1000Head |           | 96001  |
| China,TaiwanProvinceof | Ducks               | 2018 | 1000Head |           | 7926   |
| China,TaiwanProvinceof | Geeseandguineafowls | 2018 | 1000Head |           | 862    |
| China,TaiwanProvinceof | Goats               | 2018 | Head     | 144730    |        |
| China,TaiwanProvinceof | Horses              | 2018 | Head     | 857       |        |
| China,TaiwanProvinceof | Pigs                | 2018 | Head     | 5432676   |        |
| China,TaiwanProvinceof | Rabbitsandhares     | 2018 | 1000Head |           | 61     |
| China,TaiwanProvinceof | Sheep               | 2018 | Head     | 172       |        |
| China,TaiwanProvinceof | Turkeys             | 2018 | 1000Head |           | 83     |
| Colombia               | Asses               | 2018 | Head     | 97546     |        |
| Colombia               | Beehives            | 2018 | No       | 112699    |        |
| Colombia               | Cattle              | 2018 | Head     | 25657349  |        |
| Colombia               | Chickens            | 2018 | 1000Head | 156783    |        |
| Colombia               | Goats               | 2018 | Head     | 970668    |        |
| Colombia               | Horses              | 2018 | Head     | 928096    |        |
| Colombia               | Mules               | 2018 | Head     | 222023    |        |

|             |                     |      |          |         |       |
|-------------|---------------------|------|----------|---------|-------|
| Colombia    | Pigs                | 2018 | Head     | 5373445 |       |
| Colombia    | Rabbitsandhares     | 2018 | 1000Head |         | 545   |
| Colombia    | Sheep               | 2018 | Head     | 913051  |       |
| Comoros     | Asses               | 2018 | Head     | 6511    |       |
| Comoros     | Cattle              | 2018 | Head     | 50797   |       |
| Comoros     | Chickens            | 2018 | 1000Head |         | 549   |
| Comoros     | Goats               | 2018 | Head     | 121034  |       |
| Comoros     | Sheep               | 2018 | Head     | 24815   |       |
| Congo       | Cattle              | 2018 | Head     | 364343  |       |
| Congo       | Chickens            | 2018 | 1000Head |         | 2988  |
| Congo       | Goats               | 2018 | Head     | 326525  |       |
| Congo       | Horses              | 2018 | Head     | 60      |       |
| Congo       | Pigs                | 2018 | Head     | 109349  |       |
| Congo       | Sheep               | 2018 | Head     | 129741  |       |
| CookIslands | Beehives            | 2018 | No       | 46      |       |
| CookIslands | Cattle              | 2018 | Head     | 112     |       |
| CookIslands | Chickens            | 2018 | 1000Head |         | 18    |
| CookIslands | Ducks               | 2018 | 1000Head |         | .     |
| CookIslands | Goats               | 2018 | Head     | 877     |       |
| CookIslands | Horses              | 2018 | Head     | 302     |       |
| CookIslands | Pigs                | 2018 | Head     | 31595   |       |
| CostaRica   | Asses               | 2018 | Head     | 8272    |       |
| CostaRica   | Beehives            | 2018 | No       | 39376   |       |
| CostaRica   | Cattle              | 2018 | Head     | 1445762 |       |
| CostaRica   | Chickens            | 2018 | 1000Head |         | 25829 |
| CostaRica   | Goats               | 2018 | Head     | 5795    |       |
| CostaRica   | Horses              | 2018 | Head     | 128633  |       |
| CostaRica   | Mules               | 2018 | Head     | 5367    |       |
| CostaRica   | Pigs                | 2018 | Head     | 492125  |       |
| CostaRica   | Sheep               | 2018 | Head     | 2619    |       |
| IvoryCoast  | Cattle              | 2018 | Head     | 1669694 |       |
| IvoryCoast  | Chickens            | 2018 | 1000Head |         | 59127 |
| IvoryCoast  | Ducks               | 2018 | 1000Head |         | .     |
| IvoryCoast  | Goats               | 2018 | Head     | 1461319 |       |
| IvoryCoast  | Pigs                | 2018 | Head     | 344429  |       |
| IvoryCoast  | Sheep               | 2018 | Head     | 1967462 |       |
| Croatia     | Asses               | 2018 | Head     | 2047    |       |
| Croatia     | Beehives            | 2018 | No       | 488969  |       |
| Croatia     | Cattle              | 2018 | Head     | 414125  |       |
| Croatia     | Chickens            | 2018 | 1000Head |         | 10861 |
| Croatia     | Ducks               | 2018 | 1000Head |         | 56    |
| Croatia     | Geeseandguineafowls | 2018 | 1000Head |         | 16    |
| Croatia     | Goats               | 2018 | Head     | 60064   |       |
| Croatia     | Horses              | 2018 | Head     | 23886   |       |
| Croatia     | Pigs                | 2018 | Head     | 1049123 |       |
| Croatia     | Sheep               | 2018 | Head     | 636294  |       |
| Croatia     | Turkeys             | 2018 | 1000Head |         | 442   |
| Cuba        | Asses               | 2018 | Head     | 17400   |       |
| Cuba        | Beehives            | 2018 | No       | 191500  |       |
| Cuba        | Cattle              | 2018 | Head     | 3608400 |       |
| Cuba        | Chickens            | 2018 | 1000Head |         | 25614 |
| Cuba        | Goats               | 2018 | Head     | 1166000 |       |
| Cuba        | Horses              | 2018 | Head     | 916800  |       |
| Cuba        | Mules               | 2018 | Head     | 21700   |       |
| Cuba        | Pigs                | 2018 | Head     | 2399100 |       |
| Cuba        | Sheep               | 2018 | Head     | 1471800 |       |

|          |                     |      |          |          |       |
|----------|---------------------|------|----------|----------|-------|
| Cyprus   | Asses               | 2018 | Head     | 5200     |       |
| Cyprus   | Beehives            | 2018 | No       | 51218    |       |
| Cyprus   | Cattle              | 2018 | Head     | 70821    |       |
| Cyprus   | Chickens            | 2018 | 1000Head | 2949     |       |
| Cyprus   | Ducks               | 2018 | 1000Head | 5        |       |
| Cyprus   | Geeseandguineafowls | 2018 | 1000Head |          | 0     |
| Cyprus   | Goats               | 2018 | Head     | 266593   |       |
| Cyprus   | Horses              | 2018 | Head     | 663      |       |
| Cyprus   | Mules               | 2018 | Head     | 1500     |       |
| Cyprus   | Pigeons,otherbirds  | 2018 | 1000Head |          | 562   |
| Cyprus   | Pigs                | 2018 | Head     | 347671   |       |
| Cyprus   | Rabbitsandhares     | 2018 | 1000Head |          | 82    |
| Cyprus   | Sheep               | 2018 | Head     | 330229   |       |
| Cyprus   | Turkeys             | 2018 | 1000Head | 88       |       |
| Czechia  | Beehives            | 2018 | No       | 631811   |       |
| Czechia  | Cattle              | 2018 | Head     | 1415775  |       |
| Czechia  | Chickens            | 2018 | 1000Head | 22428    |       |
| Czechia  | Ducks               | 2018 | 1000Head | 781      |       |
| Czechia  | Geeseandguineafowls | 2018 | 1000Head |          | 20    |
| Czechia  | Goats               | 2018 | Head     | 30318    |       |
| Czechia  | Horses              | 2018 | Head     | 35181    |       |
| Czechia  | Pigs                | 2018 | Head     | 1557218  |       |
| Czechia  | Sheep               | 2018 | Head     | 218915   |       |
| Czechia  | Turkeys             | 2018 | 1000Head | 344      |       |
| NRKorea  | Cattle              | 2018 | Head     | 570231   |       |
| NRKorea  | Chickens            | 2018 | 1000Head | 15647    |       |
| NRKorea  | Ducks               | 2018 | 1000Head | 7167     |       |
| NRKorea  | Goats               | 2018 | Head     | 3699789  |       |
| NRKorea  | Horses              | 2018 | Head     | 48252    |       |
| NRKorea  | Pigs                | 2018 | Head     | 2611312  |       |
| NRKorea  | Rabbitsandhares     | 2018 | 1000Head |          | 32250 |
| NRKorea  | Sheep               | 2018 | Head     | 160789   |       |
| congo    | Asses               | 2018 | Head     | .        |       |
| congo    | Cattle              | 2018 | Head     | 1037536  |       |
| congo    | Chickens            | 2018 | 1000Head | 19374    |       |
| congo    | Goats               | 2018 | Head     | 4065708  |       |
| congo    | Horses              | 2018 | Head     | .        |       |
| congo    | Pigs                | 2018 | Head     | 986904   |       |
| congo    | Sheep               | 2018 | Head     | 889191   |       |
| Denmark  | Cattle              | 2018 | Head     | 1540448  |       |
| Denmark  | Chickens            | 2018 | 1000Head | 19351    |       |
| Denmark  | Ducks               | 2018 | 1000Head | 166      |       |
| Denmark  | Geeseandguineafowls | 2018 | 1000Head |          | 4     |
| Denmark  | Horses              | 2018 | Head     | 45986    |       |
| Denmark  | Pigs                | 2018 | Head     | 12781247 |       |
| Denmark  | Sheep               | 2018 | Head     | 143787   |       |
| Denmark  | Turkeys             | 2018 | 1000Head | 530      |       |
| Djibouti | Asses               | 2018 | Head     | 8376     |       |
| Djibouti | Camels              | 2018 | Head     | 70878    |       |
| Djibouti | Cattle              | 2018 | Head     | 300879   |       |
| Djibouti | Goats               | 2018 | Head     | 514664   |       |
| Djibouti | Sheep               | 2018 | Head     | 469096   |       |
| Dominica | Cattle              | 2018 | Head     | 14071    |       |
| Dominica | Chickens            | 2018 | 1000Head |          | 199   |
| Dominica | Goats               | 2018 | Head     | 9703     |       |
| Dominica | Pigs                | 2018 | Head     | 5063     |       |



|                  |                     |      |          |         |       |
|------------------|---------------------|------|----------|---------|-------|
| Dominica         | Sheep               | 2018 | Head     | 7990    |       |
| Dominica         | Asses               | 2018 | Head     | 156174  |       |
| Dominica         | Beehives            | 2018 | No       | 94568   |       |
| Dominica         | Cattle              | 2018 | Head     | 3011854 |       |
| Dominica         | Chickens            | 2018 | 1000Head | 185796  |       |
| Dominica         | Goats               | 2018 | Head     | 222991  |       |
| Dominica         | Horses              | 2018 | Head     | 359616  |       |
| Dominica         | Mules               | 2018 | Head     | 145367  |       |
| Dominica         | Pigs                | 2018 | Head     | 620624  |       |
| Dominica         | Sheep               | 2018 | Head     | 261461  |       |
| Ecuador          | Asses               | 2018 | Head     | 47036   |       |
| Ecuador          | Beehives            | 2018 | No       | 48195   |       |
| Ecuador          | Cattle              | 2018 | Head     | 4058796 |       |
| Ecuador          | Chickens            | 2018 | 1000Head | 165521  |       |
| Ecuador          | Ducks               | 2018 | 1000Head | 492     |       |
| Ecuador          | Geeseandguineafowls | 2018 | 1000Head |         | 47    |
| Ecuador          | Goats               | 2018 | Head     | 21745   |       |
| Ecuador          | Horses              | 2018 | Head     | 192833  |       |
| Ecuador          | Mules               | 2018 | Head     | 73651   |       |
| Ecuador          | Pigs                | 2018 | Head     | 1283338 |       |
| Ecuador          | Rabbitsandhares     | 2018 | 1000Head |         | 462   |
| Ecuador          | Sheep               | 2018 | Head     | 355897  |       |
| Ecuador          | Turkeys             | 2018 | 1000Head | 221     |       |
| Egypt            | Asses               | 2018 | Head     | 1338450 |       |
| Egypt            | Beehives            | 2018 | No       | 795942  |       |
| Egypt            | Buffaloes           | 2018 | Head     | 3508051 |       |
| Egypt            | Camels              | 2018 | Head     | 148060  |       |
| Egypt            | Cattle              | 2018 | Head     | 4516584 |       |
| Egypt            | Chickens            | 2018 | 1000Head | 146196  |       |
| Egypt            | Ducks               | 2018 | 1000Head | 11229   |       |
| Egypt            | Geeseandguineafowls | 2018 | 1000Head |         | 7123  |
| Egypt            | Goats               | 2018 | Head     | 4063206 |       |
| Egypt            | Horses              | 2018 | Head     | 78896   |       |
| Egypt            | Mules               | 2018 | Head     | 2859    |       |
| Egypt            | Pigeons,otherbirds  | 2018 | 1000Head |         | 11300 |
| Egypt            | Pigs                | 2018 | Head     | 9733    |       |
| Egypt            | Rabbitsandhares     | 2018 | 1000Head |         | 6000  |
| Egypt            | Sheep               | 2018 | Head     | 5552848 |       |
| Egypt            | Turkeys             | 2018 | 1000Head | 3350    |       |
| ElSalvador       | Asses               | 2018 | Head     | 3286    |       |
| ElSalvador       | Beehives            | 2018 | No       | 217041  |       |
| ElSalvador       | Cattle              | 2018 | Head     | 681372  |       |
| ElSalvador       | Chickens            | 2018 | 1000Head | 17566   |       |
| ElSalvador       | Goats               | 2018 | Head     | 14218   |       |
| ElSalvador       | Horses              | 2018 | Head     | 97957   |       |
| ElSalvador       | Mules               | 2018 | Head     | 24103   |       |
| ElSalvador       | Pigs                | 2018 | Head     | 268279  |       |
| ElSalvador       | Sheep               | 2018 | Head     | 5318    |       |
| EquatorialGuinea | Cattle              | 2018 | Head     | 5397    |       |
| EquatorialGuinea | Chickens            | 2018 | 1000Head |         | 377   |
| EquatorialGuinea | Ducks               | 2018 | 1000Head |         | 37    |
| EquatorialGuinea | Goats               | 2018 | Head     | 9639    |       |
| EquatorialGuinea | Pigs                | 2018 | Head     | 6951    |       |
| EquatorialGuinea | Sheep               | 2018 | Head     | 40617   |       |
| Eritrea          | Camels              | 2018 | Head     | 378140  |       |
| Eritrea          | Cattle              | 2018 | Head     | 2129963 |       |

|                           |                     |      |          |          |  |
|---------------------------|---------------------|------|----------|----------|--|
| Eritrea                   | Chickens            | 2018 | 1000Head | 1185     |  |
| Eritrea                   | Goats               | 2018 | Head     | 1812963  |  |
| Eritrea                   | Sheep               | 2018 | Head     | 2432034  |  |
| Estonia                   | Beehives            | 2018 | No       | 48700    |  |
| Estonia                   | Cattle              | 2018 | Head     | 251900   |  |
| Estonia                   | Chickens            | 2018 | 1000Head | 2050     |  |
| Estonia                   | Ducks               | 2018 | 1000Head | 9        |  |
| Estonia                   | Geeseandguineafowls | 2018 | 1000Head | 9        |  |
| Estonia                   | Goats               | 2018 | Head     | 5200     |  |
| Estonia                   | Horses              | 2018 | Head     | 5700     |  |
| Estonia                   | Pigs                | 2018 | Head     | 290400   |  |
| Estonia                   | Rabbitsandhares     | 2018 | 1000Head | 41       |  |
| Estonia                   | Sheep               | 2018 | Head     | 73100    |  |
| Estonia                   | Turkeys             | 2018 | 1000Head | 10       |  |
| Eswatini                  | Asses               | 2018 | Head     | 16395    |  |
| Eswatini                  | Cattle              | 2018 | Head     | 615902   |  |
| Eswatini                  | Chickens            | 2018 | 1000head | 5813     |  |
| Eswatini                  | Goats               | 2018 | Head     | 245889   |  |
| Eswatini                  | Horses              | 2018 | Head     | 1710     |  |
| Eswatini                  | Mules               | 2018 | Head     | 109      |  |
| Eswatini                  | Pigs                | 2018 | Head     | 35642    |  |
| Eswatini                  | Sheep               | 2018 | Head     | 39544    |  |
| Ethiopia                  | Asses               | 2018 | Head     | 8542747  |  |
| Ethiopia                  | Beehives            | 2018 | No       | 6018220  |  |
| Ethiopia                  | Camels              | 2018 | Head     | 1261785  |  |
| Ethiopia                  | Cattle              | 2018 | Head     | 62999736 |  |
| Ethiopia                  | Chickens            | 2018 | 1000Head | 61482    |  |
| Ethiopia                  | Goats               | 2018 | Head     | 33048456 |  |
| Ethiopia                  | Horses              | 2018 | Head     | 2296170  |  |
| Ethiopia                  | Mules               | 2018 | Head     | 340358   |  |
| Ethiopia                  | Pigs                | 2018 | Head     | 35950    |  |
| Ethiopia                  | Sheep               | 2018 | Head     | 31688157 |  |
| FalklandIslands(Malvinas) | Cattle              | 2018 | Head     | 4194     |  |
| FalklandIslands(Malvinas) | Chickens            | 2018 | 1000Head | 4        |  |
| FalklandIslands(Malvinas) | Horses              | 2018 | Head     | 1191     |  |
| FalklandIslands(Malvinas) | Pigs                | 2018 | Head     | 46       |  |
| FalklandIslands(Malvinas) | Sheep               | 2018 | Head     | 689397   |  |
| FaroeIslands              | Cattle              | 2018 | Head     | 1816     |  |
| FaroeIslands              | Sheep               | 2018 | Head     | 70816    |  |
| Fiji                      | Beehives            | 2018 | No       | 9625     |  |
| Fiji                      | Cattle              | 2018 | Head     | 53019    |  |
| Fiji                      | Chickens            | 2018 | 1000Head | 5377     |  |
| Fiji                      | Ducks               | 2018 | 1000Head | 110      |  |
| Fiji                      | Goats               | 2018 | Head     | 269123   |  |
| Fiji                      | Horses              | 2018 | Head     | 47636    |  |
| Fiji                      | Pigs                | 2018 | Head     | 154596   |  |
| Fiji                      | Sheep               | 2018 | Head     | 27697    |  |
| Fiji                      | Turkeys             | 2018 | 1000Head | 80       |  |
| Finland                   | Beehives            | 2018 | No       | 72300    |  |
| Finland                   | Cattle              | 2018 | Head     | 882277   |  |
| Finland                   | Chickens            | 2018 | 1000Head | 8781     |  |
| Finland                   | Ducks               | 2018 | 1000Head | .        |  |
| Finland                   | Goats               | 2018 | Head     | 5437     |  |
| Finland                   | Horses              | 2018 | Head     | 74400    |  |
| Finland                   | Pigs                | 2018 | Head     | 1088988  |  |
| Finland                   | Sheep               | 2018 | Head     | 154899   |  |

|                 |                     |      |          |          |      |
|-----------------|---------------------|------|----------|----------|------|
| Finland         | Turkeys             | 2018 | 1000Head | 299      |      |
| France          | Asses               | 2018 | Head     | 80460    |      |
| France          | Beehives            | 2018 | No       | 868365   |      |
| France          | Cattle              | 2018 | Head     | 18547082 |      |
| France          | Chickens            | 2018 | 1000Head | 168736   |      |
| France          | Ducks               | 2018 | 1000Head | 23976    |      |
| France          | Geeseandguineafowls | 2018 | 1000Head |          | 337  |
| France          | Goats               | 2018 | Head     | 1258656  |      |
| France          | Horses              | 2018 | Head     | 370581   |      |
| France          | Mules               | 2018 | Head     | 27985    |      |
| France          | Pigeons,otherbirds  | 2018 | 1000Head |          | 1775 |
| France          | Pigs                | 2018 | Head     | 13324723 |      |
| France          | Rabbitsandhares     | 2018 | 1000Head |          | 714  |
| France          | Sheep               | 2018 | Head     | 7042206  |      |
| France          | Turkeys             | 2018 | 1000Head | 18830    |      |
| FrenchGuyana    | Cattle              | 2018 | Head     | 18191    |      |
| FrenchGuyana    | Chickens            | 2018 | 1000Head |          | 107  |
| FrenchGuyana    | Ducks               | 2018 | 1000Head | 32       |      |
| FrenchGuyana    | Goats               | 2018 | Head     | 1659     |      |
| FrenchGuyana    | Horses              | 2018 | Head     | 930      |      |
| FrenchGuyana    | Pigs                | 2018 | Head     | 4905     |      |
| FrenchGuyana    | Sheep               | 2018 | Head     | 1059     |      |
| FrenchPolynesia | Beehives            | 2018 | No       | 1825     |      |
| FrenchPolynesia | Cattle              | 2018 | Head     | 7340     |      |
| FrenchPolynesia | Chickens            | 2018 | 1000Head |          | 324  |
| FrenchPolynesia | Ducks               | 2018 | 1000Head | 30       |      |
| FrenchPolynesia | Goats               | 2018 | Head     | 16782    |      |
| FrenchPolynesia | Horses              | 2018 | Head     | 2200     |      |
| FrenchPolynesia | Pigs                | 2018 | Head     | 29540    |      |
| FrenchPolynesia | Rabbitsandhares     | 2018 | 1000Head |          |      |
| FrenchPolynesia | Sheep               | 2018 | Head     | 442      |      |
| Gabon           | Cattle              | 2018 | Head     | 38145    |      |
| Gabon           | Chickens            | 2018 | 1000Head | 3185     |      |
| Gabon           | Goats               | 2018 | Head     | 11850    |      |
| Gabon           | Pigs                | 2018 | Head     | 222636   |      |
| Gabon           | Rabbitsandhares     | 2018 | 1000Head |          | 309  |
| Gabon           | Sheep               | 2018 | Head     | 218782   |      |
| Gambia          | Asses               | 2018 | Head     | 63791    |      |
| Gambia          | Cattle              | 2018 | Head     | 464293   |      |
| Gambia          | Chickens            | 2018 | 1000Head | 1387     |      |
| Gambia          | Goats               | 2018 | Head     | 342767   |      |
| Gambia          | Horses              | 2018 | Head     | 6008     |      |
| Gambia          | Pigs                | 2018 | Head     | 14571    |      |
| Gambia          | Sheep               | 2018 | Head     | 72611    |      |
| Georgia         | Asses               | 2018 | Head     | 10144    |      |
| Georgia         | Beehives            | 2018 | No       | 240600   |      |
| Georgia         | Buffaloes           | 2018 | Head     | 18361    |      |
| Georgia         | Cattle              | 2018 | Head     | 609700   |      |
| Georgia         | Chickens            | 2018 | 1000Head | 8220     |      |
| Georgia         | Goats               | 2018 | Head     | 51100    |      |
| Georgia         | Horses              | 2018 | Head     | 39252    |      |
| Georgia         | Mules               | 2018 | Head     | 94       |      |
| Georgia         | Pigs                | 2018 | Head     | 160700   |      |
| Georgia         | Rabbitsandhares     | 2018 | 1000Head |          | 16   |
| Georgia         | Sheep               | 2018 | Head     | 856900   |      |
| Georgia         | Turkeys             | 2018 | 1000Head | 425      |      |

|            |                     |      |          |          |     |
|------------|---------------------|------|----------|----------|-----|
| Germany    | Beehives            | 2018 | No       | 677014   |     |
| Germany    | Buffaloes           | 2018 | Head     | 9613     |     |
| Germany    | Cattle              | 2018 | Head     | 11948092 |     |
| Germany    | Chickens            | 2018 | 1000Head | 157813   |     |
| Germany    | Ducks               | 2018 | 1000Head | 2811     |     |
| Germany    | Geeseandguineafowls | 2018 | 1000Head |          | 306 |
| Germany    | Goats               | 2018 | Head     | 146900   |     |
| Germany    | Horses              | 2018 | Head     | 406269   |     |
| Germany    | Pigs                | 2018 | Head     | 26445400 |     |
| Germany    | Rabbitsandhares     | 2018 | 1000Head |          | 57  |
| Germany    | Sheep               | 2018 | Head     | 1589900  |     |
| Germany    | Turkeys             | 2018 | 1000Head | 13399    |     |
| Ghana      | Asses               | 2018 | Head     | 14910    |     |
| Ghana      | Cattle              | 2018 | Head     | 1879009  |     |
| Ghana      | Chickens            | 2018 | 1000Head | 60150    |     |
| Ghana      | Goats               | 2018 | Head     | 6720530  |     |
| Ghana      | Horses              | 2018 | Head     | 2930     |     |
| Ghana      | Pigs                | 2018 | head     | 744658   |     |
| Ghana      | Sheep               | 2018 | Head     | 4886604  |     |
| Greece     | Asses               | 2018 | Head     | 6647     |     |
| Greece     | Beehives            | 2018 | No       | 1556404  |     |
| Greece     | Buffaloes           | 2018 | Head     | 9239     |     |
| Greece     | Cattle              | 2018 | Head     | 612961   |     |
| Greece     | Chickens            | 2018 | 1000Head | 38163    |     |
| Greece     | Ducks               | 2018 | 1000Head | 36       |     |
| Greece     | Geeseandguineafowls | 2018 | 1000Head |          | 23  |
| Greece     | Goats               | 2018 | Head     | 3997519  |     |
| Greece     | Horses              | 2018 | Head     | 21668    |     |
| Greece     | Mules               | 2018 | Head     | 13334    |     |
| Greece     | Pigeons,otherbirds  | 2018 | 1000Head |          | 979 |
| Greece     | Pigs                | 2018 | Head     | 710486   |     |
| Greece     | Rabbitsandhares     | 2018 | 1000Head |          | 643 |
| Greece     | Sheep               | 2018 | Head     | 6834259  |     |
| Greece     | Turkeys             | 2018 | 1000Head | 91       |     |
| Greenland  | Beehives            | 2018 | No       | 15       |     |
| Greenland  | Cattle              | 2018 | Head     | 165      |     |
| Greenland  | Horses              | 2018 | Head     | 142      |     |
| Greenland  | Sheep               | 2018 | Head     | 18083    |     |
| Grenada    | Asses               | 2018 | Head     | 660      |     |
| Grenada    | Cattle              | 2018 | Head     | 4563     |     |
| Grenada    | Chickens            | 2018 | 1000Head | 276      |     |
| Grenada    | Goats               | 2018 | Head     | 7091     |     |
| Grenada    | Horses              | 2018 | Head     | 30       |     |
| Grenada    | Mules               | 2018 | Head     | 60       |     |
| Grenada    | Pigs                | 2018 | Head     | 2847     |     |
| Grenada    | Sheep               | 2018 | Head     | 13656    |     |
| Guadeloupe | Asses               | 2018 | Head     | 167      |     |
| Guadeloupe | Beehives            | 2018 | No       | 875      |     |
| Guadeloupe | Cattle              | 2018 | Head     | 77206    |     |
| Guadeloupe | Chickens            | 2018 | 1000Head | 293      |     |
| Guadeloupe | Ducks               | 2018 | 1000Head | 5        |     |
| Guadeloupe | Goats               | 2018 | Head     | 13819    |     |
| Guadeloupe | Horses              | 2018 | Head     | 64       |     |
| Guadeloupe | Mules               | 2018 | Head     | 139      |     |
| Guadeloupe | Pigs                | 2018 | Head     | 15396    |     |
| Guadeloupe | Rabbitsandhares     | 2018 | 1000Head |          | 19  |

|               |                     |      |          |         |  |
|---------------|---------------------|------|----------|---------|--|
| Guadeloupe    | Sheep               | 2018 | Head     | 1340    |  |
| Guadeloupe    | Turkeys             | 2018 | 1000Head | 18      |  |
| Guam          | Beehives            | 2018 | No       | 318     |  |
| Guam          | Buffaloes           | 2018 | Head     | 84      |  |
| Guam          | Cattle              | 2018 | Head     | 157     |  |
| Guam          | Chickens            | 2018 | 1000Head | 294     |  |
| Guam          | Goats               | 2018 | Head     | 867     |  |
| Guam          | Horses              | 2018 | Head     | 50      |  |
| Guam          | Pigs                | 2018 | Head     | 5626    |  |
| Guatemala     | Asses               | 2018 | Head     | 10019   |  |
| Guatemala     | Beehives            | 2018 | No       | 82725   |  |
| Guatemala     | Cattle              | 2018 | Head     | 3899889 |  |
| Guatemala     | Chickens            | 2018 | 1000Head | 36380   |  |
| Guatemala     | Goats               | 2018 | Head     | 114131  |  |
| Guatemala     | Horses              | 2018 | Head     | 132782  |  |
| Guatemala     | Mules               | 2018 | Head     | 38949   |  |
| Guatemala     | Pigs                | 2018 | Head     | 2988799 |  |
| Guatemala     | Sheep               | 2018 | Head     | 595853  |  |
| Guinea        | Asses               | 2018 | Head     | 2354    |  |
| Guinea        | Beehives            | 2018 | No       | 85058   |  |
| Guinea        | Cattle              | 2018 | Head     | 7520274 |  |
| Guinea        | Chickens            | 2018 | 1000Head | 25802   |  |
| Guinea        | Goats               | 2018 | Head     | 3248532 |  |
| Guinea        | Horses              | 2018 | Head     | 3491    |  |
| Guinea        | Pigs                | 2018 | Head     | 140026  |  |
| Guinea        | Sheep               | 2018 | Head     | 2708384 |  |
| Guinea-Bissau | Asses               | 2018 | Head     | 5252    |  |
| Guinea-Bissau | Beehives            | 2018 | No       | 6806    |  |
| Guinea-Bissau | Cattle              | 2018 | Head     | 733685  |  |
| Guinea-Bissau | Chickens            | 2018 | 1000Head | 2085    |  |
| Guinea-Bissau | Goats               | 2018 | Head     | 826342  |  |
| Guinea-Bissau | Horses              | 2018 | Head     | 2515    |  |
| Guinea-Bissau | Pigs                | 2018 | Head     | 463787  |  |
| Guinea-Bissau | Sheep               | 2018 | Head     | 505195  |  |
| Guyana        | Asses               | 2018 | Head     | 1019    |  |
| Guyana        | Beehives            | 2018 | No       | 4335    |  |
| Guyana        | Cattle              | 2018 | Head     | 98254   |  |
| Guyana        | Chickens            | 2018 | 1000Head | 28863   |  |
| Guyana        | Goats               | 2018 | Head     | 82742   |  |
| Guyana        | Horses              | 2018 | Head     | 2422    |  |
| Guyana        | Mules               | 2018 | Head     | 159     |  |
| Guyana        | Pigs                | 2018 | Head     | 10380   |  |
| Guyana        | Sheep               | 2018 | Head     | 131770  |  |
| Haiti         | Asses               | 2018 | Head     | 209999  |  |
| Haiti         | Beehives            | 2018 | No       | 27196   |  |
| Haiti         | Cattle              | 2018 | Head     | 1508282 |  |
| Haiti         | Chickens            | 2018 | 1000Head | 5815    |  |
| Haiti         | Ducks               | 2018 | 1000Head | 182     |  |
| Haiti         | Geeseandguineafowls | 2018 | 1000Head | 40      |  |
| Haiti         | Goats               | 2018 | Head     | 1988708 |  |
| Haiti         | Horses              | 2018 | Head     | 508943  |  |
| Haiti         | Mules               | 2018 | Head     | 79864   |  |
| Haiti         | Pigs                | 2018 | Head     | 1042299 |  |
| Haiti         | Sheep               | 2018 | Head     | 157912  |  |
| Haiti         | Turkeys             | 2018 | 1000Head | 196     |  |
| Honduras      | Asses               | 2018 | Head     | 23303   |  |

|           |                     |      |          |           |      |
|-----------|---------------------|------|----------|-----------|------|
| Honduras  | Beehives            | 2018 | No       | 9805      |      |
| Honduras  | Cattle              | 2018 | Head     | 2875477   |      |
| Honduras  | Chickens            | 2018 | 1000Head | 46686     |      |
| Honduras  | Goats               | 2018 | Head     | 25415     |      |
| Honduras  | Horses              | 2018 | Head     | 181252    |      |
| Honduras  | Mules               | 2018 | Head     | 70165     |      |
| Honduras  | Pigs                | 2018 | Head     | 451135    |      |
| Honduras  | Sheep               | 2018 | Head     | 16514     |      |
| Hungary   | Asses               | 2018 | Head     | 4000      |      |
| Hungary   | Beehives            | 2018 | No       | 844000    |      |
| Hungary   | Cattle              | 2018 | Head     | 870000    |      |
| Hungary   | Chickens            | 2018 | 1000Head | 31844     |      |
| Hungary   | Ducks               | 2018 | 1000Head | 4595      |      |
| Hungary   | Geeseandguineafowls | 2018 | 1000Head |           | 1189 |
| Hungary   | Goats               | 2018 | Head     | 75000     |      |
| Hungary   | Horses              | 2018 | Head     | 53000     |      |
| Hungary   | Mules               | 2018 | Head     | 178       |      |
| Hungary   | Pigs                | 2018 | Head     | 2870000   |      |
| Hungary   | Rabbitsandhares     | 2018 | 1000Head |           | 1159 |
| Hungary   | Sheep               | 2018 | Head     | 1145000   |      |
| Hungary   | Turkeys             | 2018 | 1000Head | 2905      |      |
| Iceland   | Cattle              | 2018 | Head     | 81385     |      |
| Iceland   | Chickens            | 2018 | 1000Head | 225       |      |
| Iceland   | Goats               | 2018 | Head     | 1485      |      |
| Iceland   | Horses              | 2018 | Head     | 59000     |      |
| Iceland   | Pigs                | 2018 | Head     | 29000     |      |
| Iceland   | Rabbitsandhares     | 2018 | 1000Head |           | 0    |
| Iceland   | Sheep               | 2018 | Head     | 432023    |      |
| India     | Asses               | 2018 | Head     | 229295    |      |
| India     | Beehives            | 2018 | No       | 13048275  |      |
| India     | Buffaloes           | 2018 | Head     | 114151770 |      |
| India     | Camels              | 2018 | Head     | 311950    |      |
| India     | Cattle              | 2018 | Head     | 184454035 |      |
| India     | Chickens            | 2018 | 1000Head | 801090    |      |
| India     | Ducks               | 2018 | 1000Head | 19540     |      |
| India     | Goats               | 2018 | Head     | 132749780 |      |
| India     | Horses              | 2018 | Head     | 525472    |      |
| India     | Mules               | 2018 | Head     | 200399    |      |
| India     | Pigs                | 2018 | Head     | 8465240   |      |
| India     | Sheep               | 2018 | Head     | 61686343  |      |
| Indonesia | Buffaloes           | 2018 | Head     | 894278    |      |
| Indonesia | Cattle              | 2018 | Head     | 16432945  |      |
| Indonesia | Chickens            | 2018 | 1000Head | 2384147   |      |
| Indonesia | Ducks               | 2018 | 1000Head | 62011     |      |
| Indonesia | Goats               | 2018 | Head     | 18721000  |      |
| Indonesia | Horses              | 2018 | Head     | 421020    |      |
| Indonesia | Pigs                | 2018 | Head     | 8542009   |      |
| Indonesia | Sheep               | 2018 | Head     | 17398300  |      |
| Iran      | Asses               | 2018 | Head     | 1550260   |      |
| Iran      | Beehives            | 2018 | No       | 6601394   |      |
| Iran      | Buffaloes           | 2018 | Head     | 113330    |      |
| Iran      | Camels              | 2018 | Head     | 198659    |      |
| Iran      | Cattle              | 2018 | Head     | 5244031   |      |
| Iran      | Chickens            | 2018 | 1000Head | 1071606   |      |
| Iran      | Ducks               | 2018 | 1000Head | 1602      |      |
| Iran      | Geeseandguineafowls | 2018 | 1000Head |           | 997  |

|         |                     |      |          |          |      |
|---------|---------------------|------|----------|----------|------|
| Iran    | Goats               | 2018 | Head     | 14992396 |      |
| Iran    | Horses              | 2018 | Head     | 150890   |      |
| Iran    | Mules               | 2018 | Head     | 176964   |      |
| Iran    | Pigs                | 2018 | Head     | .        |      |
| Iran    | Sheep               | 2018 | Head     | 39670704 |      |
| Iran    | Turkeys             | 2018 | 1000Head | 2041     |      |
| Iraq    | Asses               | 2018 | Head     | 379270   |      |
| Iraq    | Buffaloes           | 2018 | Head     | 215695   |      |
| Iraq    | Camels              | 2018 | Head     | 79077    |      |
| Iraq    | Cattle              | 2018 | Head     | 1996358  |      |
| Iraq    | Chickens            | 2018 | 1000Head | 47200    |      |
| Iraq    | Goats               | 2018 | Head     | 1230428  |      |
| Iraq    | Horses              | 2018 | Head     | 50509    |      |
| Iraq    | Mules               | 2018 | Head     | 10474    |      |
| Iraq    | Sheep               | 2018 | Head     | 6301583  |      |
| Ireland | Asses               | 2018 | Head     | 7190     |      |
| Ireland | Cattle              | 2018 | Head     | 7348503  |      |
| Ireland | Chickens            | 2018 | 1000Head | 15892    |      |
| Ireland | Ducks               | 2018 | 1000Head | 274      |      |
| Ireland | Geeseandguineafowls | 2018 | 1000Head |          | 61   |
| Ireland | Goats               | 2018 | Head     | 9300     |      |
| Ireland | Horses              | 2018 | Head     | 84300    |      |
| Ireland | Mules               | 2018 | Head     | 1045     |      |
| Ireland | Pigs                | 2018 | Head     | 1621900  |      |
| Ireland | Sheep               | 2018 | Head     | 5109300  |      |
| Ireland | Turkeys             | 2018 | 1000Head | 1885     |      |
| Israel  | Asses               | 2018 | Head     | 5000     |      |
| Israel  | Beehives            | 2018 | No       | 110000   |      |
| Israel  | Camels              | 2018 | Head     | 5542     |      |
| Israel  | Cattle              | 2018 | Head     | 546200   |      |
| Israel  | Chickens            | 2018 | 1000Head | 45752    |      |
| Israel  | Ducks               | 2018 | 1000Head | 182      |      |
| Israel  | Geeseandguineafowls | 2018 | 1000Head |          | 950  |
| Israel  | Goats               | 2018 | Head     | 108426   |      |
| Israel  | Horses              | 2018 | Head     | 4000     |      |
| Israel  | Mules               | 2018 | Head     | 1600     |      |
| Israel  | Pigs                | 2018 | Head     | 171000   |      |
| Israel  | Sheep               | 2018 | Head     | 477340   |      |
| Israel  | Turkeys             | 2018 | 1000Head | 3395     |      |
| Italy   | Asses               | 2018 | Head     | 20739    |      |
| Italy   | Beehives            | 2018 | No       | 386330   |      |
| Italy   | Buffaloes           | 2018 | Head     | 401307   |      |
| Italy   | Cattle              | 2018 | Head     | 5893204  |      |
| Italy   | Chickens            | 2018 | 1000Head | 150186   |      |
| Italy   | Goats               | 2018 | Head     | 866255   |      |
| Italy   | Horses              | 2018 | Head     | 369256   |      |
| Italy   | Mules               | 2018 | Head     | 6750     |      |
| Italy   | Pigs                | 2018 | Head     | 8482232  |      |
| Italy   | Rabbitsandhares     | 2018 | 1000Head |          | 6282 |
| Italy   | Sheep               | 2018 | Head     | 7179158  |      |
| Italy   | Turkeys             | 2018 | 1000Head | 25108    |      |
| Jamaica | Asses               | 2018 | Head     | 23000    |      |
| Jamaica | Beehives            | 2018 | No       | 47272    |      |
| Jamaica | Cattle              | 2018 | Head     | 123724   |      |
| Jamaica | Chickens            | 2018 | 1000Head | 14264    |      |
| Jamaica | Goats               | 2018 | Head     | 574895   |      |

|            |                     |      |          |          |  |
|------------|---------------------|------|----------|----------|--|
| Jamaica    | Horses              | 2018 | Head     | 4008     |  |
| Jamaica    | Mules               | 2018 | Head     | 10000    |  |
| Jamaica    | Pigs                | 2018 | Head     | 214733   |  |
| Jamaica    | Sheep               | 2018 | Head     | 1336     |  |
| Japan      | Beehives            | 2018 | No       | 193198   |  |
| Japan      | Cattle              | 2018 | Head     | 5842000  |  |
| Japan      | Chickens            | 2018 | 1000Head | 323126   |  |
| Japan      | Goats               | 2018 | Head     | 19009    |  |
| Japan      | Horses              | 2018 | Head     | 14249    |  |
| Japan      | Pigs                | 2018 | Head     | 9169000  |  |
| Japan      | Sheep               | 2018 | Head     | 15161    |  |
| Japan      | Turkeys             | 2018 | 1000Head | 2        |  |
| Jordan     | Asses               | 2018 | Head     | 7267     |  |
| Jordan     | Beehives            | 2018 | No       | 41371    |  |
| Jordan     | Buffaloes           | 2018 | Head     | 95       |  |
| Jordan     | Camels              | 2018 | Head     | 13545    |  |
| Jordan     | Cattle              | 2018 | Head     | 71848    |  |
| Jordan     | Chickens            | 2018 | 1000Head | 29535    |  |
| Jordan     | Ducks               | 2018 | 1000Head | 6        |  |
| Jordan     | Geeseandguineafowls | 2018 | 1000Head | 3        |  |
| Jordan     | Goats               | 2018 | Head     | 641977   |  |
| Jordan     | Horses              | 2018 | Head     | 2172     |  |
| Jordan     | Mules               | 2018 | Head     | 982      |  |
| Jordan     | Pigeons,otherbirds  | 2018 | 1000Head | 153      |  |
| Jordan     | Rabbitsandhares     | 2018 | 1000Head | 9        |  |
| Jordan     | Sheep               | 2018 | Head     | 3022862  |  |
| Jordan     | Turkeys             | 2018 | 1000Head | 3        |  |
| Kazakhstan | Asses               | 2018 | Head     | 29060    |  |
| Kazakhstan | Buffaloes           | 2018 | Head     | 10414    |  |
| Kazakhstan | Camels              | 2018 | Head     | 207566   |  |
| Kazakhstan | Cattle              | 2018 | Head     | 7150920  |  |
| Kazakhstan | Chickens            | 2018 | 1000Head | 42782    |  |
| Kazakhstan | Goats               | 2018 | Head     | 2382948  |  |
| Kazakhstan | Horses              | 2018 | Head     | 2646535  |  |
| Kazakhstan | Pigs                | 2018 | Head     | 796732   |  |
| Kazakhstan | Rabbitsandhares     | 2018 | 1000Head | 100      |  |
| Kazakhstan | Sheep               | 2018 | Head     | 16416177 |  |
| Kazakhstan | Turkeys             | 2018 | 1000Head | 1689     |  |
| Kenya      | Beehives            | 2018 | No       | 1533668  |  |
| Kenya      | Camels              | 2018 | Head     | 3273445  |  |
| Kenya      | Cattle              | 2018 | Head     | 19635142 |  |
| Kenya      | Chickens            | 2018 | 1000Head | 49068    |  |
| Kenya      | Goats               | 2018 | Head     | 26710775 |  |
| Kenya      | Horses              | 2018 | Head     | 2162     |  |
| Kenya      | Pigs                | 2018 | Head     | 667843   |  |
| Kenya      | Rabbitsandhares     | 2018 | 1000Head | 763      |  |
| Kenya      | Sheep               | 2018 | Head     | 19485689 |  |
| Kiribati   | Chickens            | 2018 | 1000Head | 681      |  |
| Kiribati   | Pigs                | 2018 | Head     | 14308    |  |
| Kuwait     | Camels              | 2018 | Head     | 12228    |  |
| Kuwait     | Cattle              | 2018 | Head     | 28072    |  |
| Kuwait     | Chickens            | 2018 | 1000Head | 53662    |  |
| Kuwait     | Goats               | 2018 | Head     | 209686   |  |
| Kuwait     | Horses              | 2018 | Head     | 1161     |  |
| Kuwait     | Sheep               | 2018 | Head     | 684231   |  |
| Kyrgyzstan | Asses               | 2018 | Head     | 28941    |  |



|            |                     |      |          |         |     |
|------------|---------------------|------|----------|---------|-----|
| Kyrgyzstan | Beehives            | 2018 | No       | 118998  |     |
| Kyrgyzstan | Camels              | 2018 | Head     | 246     |     |
| Kyrgyzstan | Cattle              | 2018 | Head     | 1627296 |     |
| Kyrgyzstan | Chickens            | 2018 | 1000Head | 4567    |     |
| Kyrgyzstan | Ducks               | 2018 | 1000Head | 90      |     |
| Kyrgyzstan | Geeseandguineafoals | 2018 | 1000Head |         | 43  |
| Kyrgyzstan | Goats               | 2018 | Head     | 806049  |     |
| Kyrgyzstan | Horses              | 2018 | Head     | 498684  |     |
| Kyrgyzstan | Mules               | 2018 | Head     | 500     |     |
| Kyrgyzstan | Pigs                | 2018 | Head     | 61260   |     |
| Kyrgyzstan | RobbitSandhares     | 2018 | 1000Head |         | 27  |
| Kyrgyzstan | Sheep               | 2018 | Head     | 5361000 |     |
| Kyrgyzstan | Turkeys             | 2018 | 1000Head | 163     |     |
| Laos       | Buffaloes           | 2018 | Head     | 1200040 |     |
| Laos       | Cattle              | 2018 | Head     | 2040907 |     |
| Laos       | Chickens            | 2018 | 1000Head | 39218   |     |
| Laos       | Ducks               | 2018 | 1000Head | 3965    |     |
| Laos       | Geeseandguineafoals | 2018 | 1000Head |         | 110 |
| Laos       | Goats               | 2018 | Head     | 816325  |     |
| Laos       | Horses              | 2018 | Head     | 32534   |     |
| Laos       | Pigs                | 2018 | Head     | 3824663 |     |
| Latvia     | Beehives            | 2018 | No       | 96      |     |
| Latvia     | Cattle              | 2018 | Head     | 405620  |     |
| Latvia     | Chickens            | 2018 | 1000Head | 4000    |     |
| Latvia     | Goats               | 2018 | Head     | 12757   |     |
| Latvia     | Horses              | 2018 | Head     | 8870    |     |
| Latvia     | Pigs                | 2018 | Head     | 320563  |     |
| Latvia     | RobbitSandhares     | 2018 | 1000Head |         | 20  |
| Latvia     | Sheep               | 2018 | Head     | 112208  |     |
| Latvia     | Turkeys             | 2018 | 1000Head | 3       |     |
| Lebanon    | Asses               | 2018 | Head     | 14211   |     |
| Lebanon    | Beehives            | 2018 | No       | 251121  |     |
| Lebanon    | Camels              | 2018 | Head     | 200     |     |
| Lebanon    | Cattle              | 2018 | Head     | 81993   |     |
| Lebanon    | Chickens            | 2018 | 1000Head | 74405   |     |
| Lebanon    | Goats               | 2018 | Head     | 509275  |     |
| Lebanon    | Horses              | 2018 | Head     | 3252    |     |
| Lebanon    | Mules               | 2018 | Head     | 4660    |     |
| Lebanon    | Pigs                | 2018 | Head     | 6050    |     |
| Lebanon    | Sheep               | 2018 | Head     | 459829  |     |
| Lebanon    | Turkeys             | 2018 | 1000Head |         |     |
| Lesotho    | Asses               | 2018 | Head     | 123512  |     |
| Lesotho    | Cattle              | 2018 | Head     | 496238  |     |
| Lesotho    | Chickens            | 2018 | 1000Head | 476     |     |
| Lesotho    | Goats               | 2018 | Head     | 886772  |     |
| Lesotho    | Horses              | 2018 | Head     | 63436   |     |
| Lesotho    | Mules               | 2018 | Head     | 283     |     |
| Lesotho    | Pigs                | 2018 | Head     | 70749   |     |
| Lesotho    | Sheep               | 2018 | Head     | 1610010 |     |
| Liberia    | Cattle              | 2018 | Head     | 44891   |     |
| Liberia    | Chickens            | 2018 | 1000Head | 8944    |     |
| Liberia    | Ducks               | 2018 | 1000Head | 384     |     |
| Liberia    | Goats               | 2018 | Head     | 412610  |     |
| Liberia    | Pigs                | 2018 | Head     | 313396  |     |
| Liberia    | Sheep               | 2018 | Head     | 309992  |     |
| Libya      | Asses               | 2018 | Head     | 26784   |     |

|               |                     |      |          |          |  |
|---------------|---------------------|------|----------|----------|--|
| Libya         | Beehives            | 2018 | No       | 36489    |  |
| Libya         | Camels              | 2018 | Head     | 65726    |  |
| Libya         | Cattle              | 2018 | Head     | 216101   |  |
| Libya         | Chickens            | 2018 | 1000Head | 37359    |  |
| Libya         | Goats               | 2018 | Head     | 2635943  |  |
| Libya         | Horses              | 2018 | Head     | 48491    |  |
| Libya         | Mules               | 2018 | Head     | .        |  |
| Libya         | Sheep               | 2018 | Head     | 7449771  |  |
| Liechtenstein | Asses               | 2018 | Head     | 174      |  |
| Liechtenstein | Beehives            | 2018 | No       | 985      |  |
| Liechtenstein | Cattle              | 2018 | Head     | 5894     |  |
| Liechtenstein | Chickens            | 2018 | 1000Head | 13       |  |
| Liechtenstein | Goats               | 2018 | Head     | 431      |  |
| Liechtenstein | Horses              | 2018 | Head     | 353      |  |
| Liechtenstein | Mules               | 2018 | Head     | 8        |  |
| Liechtenstein | Pigs                | 2018 | Head     | 1772     |  |
| Liechtenstein | Sheep               | 2018 | Head     | 3989     |  |
| Lithuania     | Beehives            | 2018 | No       | 137798   |  |
| Lithuania     | Cattle              | 2018 | Head     | 67893    |  |
| Lithuania     | Chickens            | 2018 | 1000Head | 10204    |  |
| Lithuania     | Ducks               | 2018 | 1000Head | 15       |  |
| Lithuania     | Geeseandguineafowls | 2018 | 1000Head | 10       |  |
| Lithuania     | Goats               | 2018 | Head     | 14319    |  |
| Lithuania     | Horses              | 2018 | Head     | 14961    |  |
| Lithuania     | Pigs                | 2018 | Head     | 611931   |  |
| Lithuania     | Rabbitsandhares     | 2018 | 1000Head | 121      |  |
| Lithuania     | Sheep               | 2018 | Head     | 169685   |  |
| Lithuania     | Turkeys             | 2018 | 1000Head | 139      |  |
| Luxembourg    | Beehives            | 2018 | No       | 5778     |  |
| Luxembourg    | Cattle              | 2018 | Head     | 196127   |  |
| Luxembourg    | Chickens            | 2018 | 1000Head | 123      |  |
| Luxembourg    | Goats               | 2018 | Head     | 5075     |  |
| Luxembourg    | Horses              | 2018 | Head     | 4662     |  |
| Luxembourg    | Pigs                | 2018 | Head     | 91736    |  |
| Luxembourg    | Rabbitsandhares     | 2018 | 1000Head | 3        |  |
| Luxembourg    | Sheep               | 2018 | Head     | 8654     |  |
| Madagascar    | Asses               | 2018 | Head     | 158      |  |
| Madagascar    | Beehives            | 2018 | No       | 135254   |  |
| Madagascar    | Cattle              | 2018 | Head     | 10329790 |  |
| Madagascar    | Chickens            | 2018 | 1000Head | 38917    |  |
| Madagascar    | Ducks               | 2018 | 1000Head | 4535     |  |
| Madagascar    | Geeseandguineafowls | 2018 | 1000Head | 3020     |  |
| Madagascar    | Goats               | 2018 | Head     | 1638265  |  |
| Madagascar    | Horses              | 2018 | Head     | 497      |  |
| Madagascar    | Pigs                | 2018 | Head     | 1721218  |  |
| Madagascar    | Rabbitsandhares     | 2018 | 1000Head | 125      |  |
| Madagascar    | Sheep               | 2018 | Head     | 847678   |  |
| Madagascar    | Turkeys             | 2018 | 1000Head | 2348     |  |
| Malawi        | Asses               | 2018 | Head     | 6350     |  |
| Malawi        | Cattle              | 2018 | Head     | 1655517  |  |
| Malawi        | Chickens            | 2018 | 1000Head | 18606    |  |
| Malawi        | Goats               | 2018 | Head     | 8374006  |  |
| Malawi        | Horses              | 2018 | Head     | 65       |  |
| Malawi        | Pigs                | 2018 | Head     | 6388283  |  |
| Malawi        | Sheep               | 2018 | Head     | 317899   |  |
| Malaysia      | Buffaloes           | 2018 | Head     | 117707   |  |

|            |                     |      |          |          |  |
|------------|---------------------|------|----------|----------|--|
| Malaysia   | Cattle              | 2018 | Head     | 752547   |  |
| Malaysia   | Chickens            | 2018 | 1000Head | 821308   |  |
| Malaysia   | Ducks               | 2018 | 1000Head | 10477    |  |
| Malaysia   | Goats               | 2018 | Head     | 443733   |  |
| Malaysia   | Horses              | 2018 | Head     | 4121     |  |
| Malaysia   | Pigs                | 2018 | Head     | 1654801  |  |
| Malaysia   | Sheep               | 2018 | Head     | 135111   |  |
| Mali       | Asses               | 2018 | Head     | 1121895  |  |
| Mali       | Beehives            | 2018 | No       | 36162    |  |
| Mali       | Camels              | 2018 | Head     | 1216758  |  |
| Mali       | Cattle              | 2018 | Head     | 11758377 |  |
| Mali       | Chickens            | 2018 | 1000Head | 47255    |  |
| Mali       | Goats               | 2018 | Head     | 25224980 |  |
| Mali       | Horses              | 2018 | Head     | 572730   |  |
| Mali       | Pigs                | 2018 | Head     | 85160    |  |
| Mali       | Sheep               | 2018 | Head     | 18270000 |  |
| Malta      | Asses               | 2018 | Head     | 461      |  |
| Malta      | Cattle              | 2018 | Head     | 14125    |  |
| Malta      | Chickens            | 2018 | 1000Head | 1001     |  |
| Malta      | Ducks               | 2018 | 1000Head | .        |  |
| Malta      | Goats               | 2018 | Head     | 5726     |  |
| Malta      | Horses              | 2018 | Head     | 1073     |  |
| Malta      | Mules               | 2018 | Head     | 294      |  |
| Malta      | Pigs                | 2018 | Head     | 36294    |  |
| Malta      | Rabbitsandhorses    | 2018 | 1000Head | 293      |  |
| Malta      | Sheep               | 2018 | Head     | 13162    |  |
| Malta      | Turkeys             | 2018 | 1000Head | 11       |  |
| Martinique | Beehives            | 2018 | No       | 0        |  |
| Martinique | Cattle              | 2018 | Head     | 12965    |  |
| Martinique | Chickens            | 2018 | 1000Head | 467      |  |
| Martinique | Ducks               | 2018 | 1000Head | .        |  |
| Martinique | Geeseandguineafowls | 2018 | 1000Head | .        |  |
| Martinique | Goats               | 2018 | Head     | 4776     |  |
| Martinique | Horses              | 2018 | Head     | 1216     |  |
| Martinique | Pigs                | 2018 | Head     | 8326     |  |
| Martinique | Rabbitsandhorses    | 2018 | 1000Head | 3        |  |
| Martinique | Sheep               | 2018 | Head     | 12626    |  |
| Mauritania | Asses               | 2018 | Head     | 325582   |  |
| Mauritania | Camels              | 2018 | Head     | 1485784  |  |
| Mauritania | Cattle              | 2018 | Head     | 1912564  |  |
| Mauritania | Chickens            | 2018 | 1000Head | 4660     |  |
| Mauritania | Goats               | 2018 | Head     | 7510412  |  |
| Mauritania | Horses              | 2018 | Head     | 66610    |  |
| Mauritania | Sheep               | 2018 | Head     | 11035860 |  |
| Mauritius  | Asses               | 2018 | Head     | 60       |  |
| Mauritius  | Buffaloes           | 2018 | Head     | 25       |  |
| Mauritius  | Cattle              | 2018 | Head     | 3885     |  |
| Mauritius  | Chickens            | 2018 | 1000Head | 16518    |  |
| Mauritius  | Ducks               | 2018 | 1000Head | 40       |  |
| Mauritius  | Geeseandguineafowls | 2018 | 1000Head | 21       |  |
| Mauritius  | Goats               | 2018 | Head     | 26026    |  |
| Mauritius  | Horses              | 2018 | Head     | 150      |  |
| Mauritius  | Mules               | 2018 | Head     | 20       |  |
| Mauritius  | Pigs                | 2018 | Head     | 19662    |  |
| Mauritius  | Rabbitsandhorses    | 2018 | 1000Head | 5        |  |
| Mauritius  | Sheep               | 2018 | Head     | 3806     |  |

|                               |                 |      |          |          |  |
|-------------------------------|-----------------|------|----------|----------|--|
| Mauritius                     | Turkeys         | 2018 | 1000Head | 2        |  |
| Mexico                        | Asses           | 2018 | Head     | 8263853  |  |
| Mexico                        | Beehives        | 2018 | No       | 2172107  |  |
| Mexico                        | Cattle          | 2018 | Head     | 34820271 |  |
| Mexico                        | Chickens        | 2018 | 1000Head | 568372   |  |
| Mexico                        | Ducks           | 2018 | 1000Head | 8504     |  |
| Mexico                        | Goats           | 2018 | Head     | 6749589  |  |
| Mexico                        | Horses          | 2018 | Head     | 6385102  |  |
| Mexico                        | Mules           | 2018 | Head     | 3287449  |  |
| Mexico                        | Pigs            | 2018 | Head     | 17839900 |  |
| Mexico                        | Rabbitsandheres | 2018 | 1000Head | 1407     |  |
| Mexico                        | Sheep           | 2018 | Head     | 8883535  |  |
| Mexico                        | Turkeys         | 2018 | 1000Head | 3775     |  |
| Micronesia(FederatedStatesof) | Buffaloes       | 2018 | Head     | 177      |  |
| Micronesia(FederatedStatesof) | Cattle          | 2018 | Head     | 18023    |  |
| Micronesia(FederatedStatesof) | Chickens        | 2018 | 1000Head | 191      |  |
| Micronesia(FederatedStatesof) | Ducks           | 2018 | 1000Head | 1        |  |
| Micronesia(FederatedStatesof) | Goats           | 2018 | Head     | 4672     |  |
| Micronesia(FederatedStatesof) | Pigs            | 2018 | Head     | 37927    |  |
| Mongolia                      | Asses           | 2018 | Head     | 38       |  |
| Mongolia                      | Beehives        | 2018 | No       | 9791     |  |
| Mongolia                      | Camels          | 2018 | Head     | 459702   |  |
| Mongolia                      | Cattle          | 2018 | Head     | 4380879  |  |
| Mongolia                      | Chickens        | 2018 | 1000Head | 878      |  |
| Mongolia                      | Goats           | 2018 | Head     | 27124700 |  |
| Mongolia                      | Horses          | 2018 | Head     | 3940092  |  |
| Mongolia                      | Pigs            | 2018 | Head     | 27819    |  |
| Mongolia                      | Sheep           | 2018 | Head     | 30554804 |  |
| Montenegro                    | Beehives        | 2018 | No       | 65425    |  |
| Montenegro                    | Cattle          | 2018 | Head     | 86539    |  |
| Montenegro                    | Chickens        | 2018 | 1000Head | 680      |  |
| Montenegro                    | Goats           | 2018 | Head     | 30087    |  |
| Montenegro                    | Horses          | 2018 | Head     | 4063     |  |
| Montenegro                    | Pigs            | 2018 | Head     | 21821    |  |
| Montenegro                    | Sheep           | 2018 | Head     | 186490   |  |
| Montserrat                    | Asses           | 2018 | Head     | 404      |  |
| Montserrat                    | Cattle          | 2018 | Head     | 10074    |  |
| Montserrat                    | Chickens        | 2018 | 1000Head | 35       |  |
| Montserrat                    | Goats           | 2018 | Head     | 7186     |  |
| Montserrat                    | Pigs            | 2018 | Head     | 1232     |  |
| Montserrat                    | Sheep           | 2018 | Head     | 4838     |  |
| Morocco                       | Asses           | 2018 | Head     | 934000   |  |
| Morocco                       | Beehives        | 2018 | No       | 370896   |  |
| Morocco                       | Camels          | 2018 | Head     | 59883    |  |
| Morocco                       | Cattle          | 2018 | Head     | 3441000  |  |
| Morocco                       | Chickens        | 2018 | 1000Head | 204604   |  |
| Morocco                       | Goats           | 2018 | Head     | 6731000  |  |
| Morocco                       | Horses          | 2018 | Head     | 190000   |  |
| Morocco                       | Mules           | 2018 | Head     | 390000   |  |
| Morocco                       | Pigs            | 2018 | Head     | 8001     |  |
| Morocco                       | Sheep           | 2018 | Head     | 19880000 |  |
| Morocco                       | Turkeys         | 2018 | 1000Head | 9995     |  |
| Mozambique                    | Asses           | 2018 | Head     | 49428    |  |
| Mozambique                    | Beehives        | 2018 | No       | 46243    |  |
| Mozambique                    | Cattle          | 2018 | Head     | 2020189  |  |
| Mozambique                    | Chickens        | 2018 | 1000Head | 16918    |  |

|              |                     |      |          |          |  |
|--------------|---------------------|------|----------|----------|--|
| Mozambique   | Ducks               | 2018 | 1000Head | 2552     |  |
| Mozambique   | Geeseandguineafowls | 2018 | 1000Head | 15657    |  |
| Mozambique   | Goats               | 2018 | Head     | 3750597  |  |
| Mozambique   | Pigs                | 2018 | Head     | 1680213  |  |
| Mozambique   | Rabbitsandhares     | 2018 | 1000Head | 112      |  |
| Mozambique   | Sheep               | 2018 | Head     | 169910   |  |
| Mozambique   | Turkeys             | 2018 | 1000Head | 178      |  |
| Myanmar      | Beehives            | 2018 | No       | 69691    |  |
| Myanmar      | Buffaloes           | 2018 | Head     | 3790031  |  |
| Myanmar      | Cattle              | 2018 | Head     | 17418364 |  |
| Myanmar      | Chickens            | 2018 | 1000Head | 309011   |  |
| Myanmar      | Ducks               | 2018 | 1000Head | 18930    |  |
| Myanmar      | Geeseandguineafowls | 2018 | 1000Head | 2265     |  |
| Myanmar      | Goats               | 2018 | Head     | 4591607  |  |
| Myanmar      | Horses              | 2018 | Head     | 56510    |  |
| Myanmar      | Mules               | 2018 | Head     | 959      |  |
| Myanmar      | Pigeons,otherbirds  | 2018 | 1000Head | 722      |  |
| Myanmar      | Pigs                | 2018 | Head     | 12934454 |  |
| Myanmar      | Sheep               | 2018 | Head     | 1334305  |  |
| Myanmar      | Turkeys             | 2018 | 1000Head | 3        |  |
| Namibia      | Asses               | 2018 | Head     | 153126   |  |
| Namibia      | Camels              | 2018 | Head     | 91       |  |
| Namibia      | Cattle              | 2018 | Head     | 2697115  |  |
| Namibia      | Chickens            | 2018 | 1000Head | 4294     |  |
| Namibia      | Goats               | 2018 | Head     | 1695379  |  |
| Namibia      | Horses              | 2018 | Head     | 44199    |  |
| Namibia      | Mules               | 2018 | Head     | 6768     |  |
| Namibia      | Pigeons,otherbirds  | 2018 | 1000Head | 157      |  |
| Namibia      | Pigs                | 2018 | Head     | 94746    |  |
| Namibia      | Sheep               | 2018 | Head     | 1717774  |  |
| Nauru        | Chickens            | 2018 | 1000Head | 5        |  |
| Nauru        | Pigs                | 2018 | Head     | 3041     |  |
| Nepal        | Buffaloes           | 2018 | Head     | 5277019  |  |
| Nepal        | Cattle              | 2018 | Head     | 7376306  |  |
| Nepal        | Chickens            | 2018 | 1000Head | 72245    |  |
| Nepal        | Ducks               | 2018 | 1000Head | 404      |  |
| Nepal        | Goats               | 2018 | Head     | 11647319 |  |
| Nepal        | Pigs                | 2018 | Head     | 1435369  |  |
| Nepal        | Sheep               | 2018 | Head     | 800749   |  |
| Netherlands  | Beehives            | 2018 | No       | .        |  |
| Netherlands  | Cattle              | 2018 | Head     | 3850370  |  |
| Netherlands  | Chickens            | 2018 | 1000Head | 103797   |  |
| Netherlands  | Ducks               | 2018 | 1000Head | 1026     |  |
| Netherlands  | Goats               | 2018 | Head     | 561357   |  |
| Netherlands  | Horses              | 2018 | Head     | 141386   |  |
| Netherlands  | Pigs                | 2018 | Head     | 12418538 |  |
| Netherlands  | Rabbitsandhares     | 2018 | 1000Head | 326      |  |
| Netherlands  | Sheep               | 2018 | Head     | 956943   |  |
| Netherlands  | Turkeys             | 2018 | 1000Head | 615      |  |
| Netherl      | Asses               | 2018 | Head     | 2763     |  |
| Netherl      | Cattle              | 2018 | Head     | 508      |  |
| Netherl      | Chickens            | 2018 | 1000Head | 163      |  |
| Netherl      | Goats               | 2018 | Head     | 14146    |  |
| Netherl      | Pigs                | 2018 | Head     | 2913     |  |
| Netherl      | Sheep               | 2018 | Head     | 10006    |  |
| NewCaledonia | Beehives            | 2018 | No       | 7250     |  |

|                |                     |      |          |          |  |
|----------------|---------------------|------|----------|----------|--|
| NewCaledonia   | Cattle              | 2018 | Head     | 83493    |  |
| NewCaledonia   | Chickens            | 2018 | 1000Head | 477      |  |
| NewCaledonia   | Goats               | 2018 | Head     | 1990     |  |
| NewCaledonia   | Horses              | 2018 | Head     | 11277    |  |
| NewCaledonia   | Pigs                | 2018 | Head     | 40268    |  |
| NewCaledonia   | Sheep               | 2018 | Head     | 2270     |  |
| NewZealand     | Beehives            | 2018 | No       | 879758   |  |
| NewZealand     | Cattle              | 2018 | Head     | 10106803 |  |
| NewZealand     | Chickens            | 2018 | 1000Head | 24161    |  |
| NewZealand     | Ducks               | 2018 | 1000Head | 183      |  |
| NewZealand     | Geeseandguineafoals | 2018 | 1000Head | 66       |  |
| NewZealand     | Goats               | 2018 | Head     | 80833    |  |
| NewZealand     | Horses              | 2018 | Head     | 40525    |  |
| NewZealand     | Pigs                | 2018 | Head     | 267051   |  |
| NewZealand     | Sheep               | 2018 | Head     | 27295749 |  |
| NewZealand     | Turkeys             | 2018 | 1000Head | 77       |  |
| Nicaragua      | Asses               | 2018 | Head     | 9078     |  |
| Nicaragua      | Cattle              | 2018 | Head     | 5157570  |  |
| Nicaragua      | Chickens            | 2018 | 1000Head | 23561    |  |
| Nicaragua      | Goats               | 2018 | Head     | 7789     |  |
| Nicaragua      | Horses              | 2018 | Head     | 288152   |  |
| Nicaragua      | Mules               | 2018 | Head     | 48021    |  |
| Nicaragua      | Pigs                | 2018 | Head     | 520478   |  |
| Nicaragua      | Sheep               | 2018 | Head     | 6768     |  |
| Niger          | Asses               | 2018 | Head     | 1674176  |  |
| Niger          | Camels              | 2018 | Head     | 1811395  |  |
| Niger          | Cattle              | 2018 | Head     | 14363595 |  |
| Niger          | Chickens            | 2018 | 1000Head | 19822    |  |
| Niger          | Goats               | 2018 | Head     | 17411659 |  |
| Niger          | Horses              | 2018 | Head     | 253189   |  |
| Niger          | Pigs                | 2018 | Head     | 42905    |  |
| Niger          | Sheep               | 2018 | Head     | 12746788 |  |
| Nigeria        | Asses               | 2018 | Head     | 1346203  |  |
| Nigeria        | Beehives            | 2018 | No       | .        |  |
| Nigeria        | Camels              | 2018 | Head     | 283395   |  |
| Nigeria        | Cattle              | 2018 | Head     | 21418189 |  |
| Nigeria        | Chickens            | 2018 | 1000Head | 139431   |  |
| Nigeria        | Goats               | 2018 | Head     | 79382178 |  |
| Nigeria        | Horses              | 2018 | Head     | 85941    |  |
| Nigeria        | Pigs                | 2018 | Head     | 7489165  |  |
| Nigeria        | Rabbitsandhares     | 2018 | 1000Head | 4670     |  |
| Nigeria        | Sheep               | 2018 | Head     | 42871860 |  |
| Niue           | Beehives            | 2018 | No       | 821      |  |
| Niue           | Cattle              | 2018 | Head     | 113      |  |
| Niue           | Chickens            | 2018 | 1000Head | 18       |  |
| Niue           | Pigs                | 2018 | Head     | 2250     |  |
| NorfolkIsland  | Cattle              | 2018 | Head     | .        |  |
| NorthMacedonia | Beehives            | 2018 | No       | 81197    |  |
| NorthMacedonia | Ruffaloes           | 2018 | Head     | 643      |  |
| NorthMacedonia | Cattle              | 2018 | Head     | 256181   |  |
| NorthMacedonia | Chickens            | 2018 | 1000Head | 1828     |  |
| NorthMacedonia | Goats               | 2018 | Head     | 117447   |  |
| NorthMacedonia | Horses              | 2018 | Head     | 10041    |  |
| NorthMacedonia | Pigs                | 2018 | Head     | 196638   |  |
| NorthMacedonia | Sheep               | 2018 | Head     | 728990   |  |
| Norway         | Cattle              | 2018 | Head     | 882350   |  |

|                |                     |      |          |          |      |
|----------------|---------------------|------|----------|----------|------|
| Norway         | Chickens            | 2018 | 1000Head | 15734    |      |
| Norway         | Ducks               | 2018 | 1000Head | 184      |      |
| Norway         | Goats               | 2018 | Head     | 65706    |      |
| Norway         | Horses              | 2018 | Head     | 34162    |      |
| Norway         | Pigs                | 2018 | Head     | 817213   |      |
| Norway         | Robotsandhares      | 2018 | 1000Head |          | 1    |
| Norway         | Sheep               | 2018 | Head     | 2402528  |      |
| Norway         | Turkeys             | 2018 | 1000Head | 571      |      |
| Oman           | Asses               | 2018 | Head     | 22682    |      |
| Oman           | Beehives            | 2018 | No       | 100000   |      |
| Oman           | Camels              | 2018 | Head     | 268127   |      |
| Oman           | Cattle              | 2018 | Head     | 396913   |      |
| Oman           | Chickens            | 2018 | 1000Head | 4869     |      |
| Oman           | Ducks               | 2018 | 1000Head | .        |      |
| Oman           | Goats               | 2018 | Head     | 2302232  |      |
| Oman           | Sheep               | 2018 | Head     | 605269   |      |
| Pakistan       | Asses               | 2018 | Head     | 5319000  |      |
| Pakistan       | Beehives            | 2018 | No       | 397153   |      |
| Pakistan       | Buffaloes           | 2018 | Head     | 38548000 |      |
| Pakistan       | Camels              | 2018 | Head     | 1078000  |      |
| Pakistan       | Cattle              | 2018 | Head     | 46084000 |      |
| Pakistan       | Chickens            | 2018 | 1000Head | 524137   |      |
| Pakistan       | Ducks               | 2018 | 1000Head | 2640     |      |
| Pakistan       | Goats               | 2018 | Head     | 74134000 |      |
| Pakistan       | Horses              | 2018 | Head     | 369000   |      |
| Pakistan       | Mules               | 2018 | Head     | 197000   |      |
| Pakistan       | Sheep               | 2018 | Head     | 30498000 |      |
| Palestine      | Beehives            | 2018 | No       | 36796    |      |
| Palestine      | Cattle              | 2018 | Head     | 31432    |      |
| Palestine      | Chickens            | 2018 | 1000Head | 6815     |      |
| Palestine      | Goats               | 2018 | Head     | 208491   |      |
| Palestine      | Sheep               | 2018 | Head     | 753677   |      |
| Panama         | Cattle              | 2018 | Head     | 1558400  |      |
| Panama         | Chickens            | 2018 | 1000Head | 26278    |      |
| Panama         | Ducks               | 2018 | 1000Head | 108      |      |
| Panama         | Goats               | 2018 | Head     | 9193     |      |
| Panama         | Horses              | 2018 | Head     | 100083   |      |
| Panama         | Mules               | 2018 | Head     | 2171     |      |
| Panama         | Pigs                | 2018 | Head     | 369200   |      |
| Panama         | Turkeys             | 2018 | 1000Head | 17       |      |
| PapuaNewGuinea | Cattle              | 2018 | Head     | 83249    |      |
| PapuaNewGuinea | Chickens            | 2018 | 1000Head |          | 4619 |
| PapuaNewGuinea | Ducks               | 2018 | 1000Head | 18       |      |
| PapuaNewGuinea | Goats               | 2018 | Head     | 3016     |      |
| PapuaNewGuinea | Horses              | 2018 | Head     | 2063     |      |
| PapuaNewGuinea | Pigs                | 2018 | Head     | 2162034  |      |
| PapuaNewGuinea | Sheep               | 2018 | Head     | 7350     |      |
| PapuaNewGuinea | Turkeys             | 2018 | 1000Head |          | 17   |
| Paraguay       | Asses               | 2018 | Head     | 34968    |      |
| Paraguay       | Beehives            | 2018 | No       | 58618    |      |
| Paraguay       | Cattle              | 2018 | Head     | 13500965 |      |
| Paraguay       | Chickens            | 2018 | 1000Head | 18219    |      |
| Paraguay       | Ducks               | 2018 | 1000Head | 1447     |      |
| Paraguay       | Geeseandguineafowls | 2018 | 1000Head |          | 132  |
| Paraguay       | Goats               | 2018 | Head     | 146386   |      |
| Paraguay       | Horses              | 2018 | Head     | 271380   |      |

|             |                     |      |          |          |  |
|-------------|---------------------|------|----------|----------|--|
| Paraguay    | Mules               | 2018 | Head     | 10608    |  |
| Paraguay    | Pigs                | 2018 | Head     | 1268387  |  |
| Paraguay    | Sheep               | 2018 | Head     | 531947   |  |
| Paraguay    | Turkeys             | 2018 | 1000Head | 223      |  |
| Peru        | Asses               | 2018 | Head     | 648844   |  |
| Peru        | Camelids,other      | 2018 | Head     | 6042918  |  |
| Peru        | Cattle              | 2018 | Head     | 5575483  |  |
| Peru        | Chickens            | 2018 | 1000Head | 160659   |  |
| Peru        | Goats               | 2018 | Head     | 1807028  |  |
| Peru        | Horses              | 2018 | Head     | 748815   |  |
| Peru        | Mules               | 2018 | Head     | 317864   |  |
| Peru        | Pigs                | 2018 | Head     | 3227564  |  |
| Peru        | Rabbitsandhares     | 2018 | 1000Head | 1182     |  |
| Peru        | Rodents,other       | 2018 | 1000Head | 16762    |  |
| Peru        | Sheep               | 2018 | Head     | 11531908 |  |
| Philippines | Beffaloes           | 2018 | Head     | 286265   |  |
| Philippines | Cattle              | 2018 | Head     | 2559857  |  |
| Philippines | Chickens            | 2018 | 1000Head | 173772   |  |
| Philippines | Ducks               | 2018 | 1000Head | 11220    |  |
| Philippines | Geeseandguineafowls | 2018 | 1000Head | 406      |  |
| Philippines | Goats               | 2018 | Head     | 3724808  |  |
| Philippines | Horses              | 2018 | Head     | 249164   |  |
| Philippines | Pigs                | 2018 | Head     | 12804441 |  |
| Philippines | Sheep               | 2018 | Head     | 30020    |  |
| Philippines | Turkeys             | 2018 | 1000Head | 584      |  |
| Poland      | Beehives            | 2018 | No       | 1586063  |  |
| Poland      | Cattle              | 2018 | Head     | 6201441  |  |
| Poland      | Chickens            | 2018 | 1000Head | 182200   |  |
| Poland      | Ducks               | 2018 | 1000Head | 4571     |  |
| Poland      | Geeseandguineafowls | 2018 | 1000Head | 5132     |  |
| Poland      | Goats               | 2018 | Head     | 44204    |  |
| Poland      | Horses              | 2018 | Head     | 185494   |  |
| Poland      | Pigs                | 2018 | Head     | 11827520 |  |
| Poland      | Rabbitsandhares     | 2018 | 1000Head | 350      |  |
| Poland      | Sheep               | 2018 | Head     | 276737   |  |
| Poland      | Turkeys             | 2018 | 1000Head | 14173    |  |
| Portugal    | Asses               | 2018 | Head     | 7864     |  |
| Portugal    | Beehives            | 2018 | No       | 213009   |  |
| Portugal    | Cattle              | 2018 | Head     | 1402030  |  |
| Portugal    | Chickens            | 2018 | 1000Head | 10811    |  |
| Portugal    | Ducks               | 2018 | 1000Head | .        |  |
| Portugal    | Goats               | 2018 | Head     | 333000   |  |
| Portugal    | Horses              | 2018 | Head     | 25003    |  |
| Portugal    | Mules               | 2018 | Head     | 3078     |  |
| Portugal    | Pigs                | 2018 | Head     | 2205000  |  |
| Portugal    | Sheep               | 2018 | Head     | 2208003  |  |
| Portugal    | Turkeys             | 2018 | 1000Head | 6436     |  |
| PuertoRico  | Asses               | 2018 | Head     | 2000     |  |
| PuertoRico  | Beehives            | 2018 | No       | 2993     |  |
| PuertoRico  | Cattle              | 2018 | Head     | 370625   |  |
| PuertoRico  | Chickens            | 2018 | 1000Head | 15336    |  |
| PuertoRico  | Goats               | 2018 | Head     | 2687     |  |
| PuertoRico  | Horses              | 2018 | Head     | 5710     |  |
| PuertoRico  | Mules               | 2018 | Head     | 2618     |  |
| PuertoRico  | Pigs                | 2018 | Head     | 42417    |  |
| PuertoRico  | Rabbitsandhares     | 2018 | 1000Head | 34       |  |



|            |                     |      |          |          |      |
|------------|---------------------|------|----------|----------|------|
| PuertoRico | Sheep               | 2018 | Head     | 6998     |      |
| Qatar      | Camels              | 2018 | Head     | 95012    |      |
| Qatar      | Cattle              | 2018 | Head     | 14168    |      |
| Qatar      | Chickens            | 2018 | 1000Head | 9336     |      |
| Qatar      | Goats               | 2018 | Head     | 246286   |      |
| Qatar      | Horses              | 2018 | Head     | 6623     |      |
| Qatar      | Sheep               | 2018 | Head     | 272485   |      |
| SKorea     | Asses               | 2018 | Head     | 0        |      |
| SKorea     | Beehives            | 2018 | No       | 2165816  |      |
| SKorea     | Cattle              | 2018 | Head     | 3526886  |      |
| SKorea     | Chickens            | 2018 | 1000Head | 172538   |      |
| SKorea     | Ducks               | 2018 | 1000Head | 7317     |      |
| SKorea     | Geeseandguineafowls | 2018 | 1000Head |          | 7    |
| SKorea     | Goats               | 2018 | Head     | 374355   |      |
| SKorea     | Horses              | 2018 | Head     | 26715    |      |
| SKorea     | Mules               | 2018 | Head     | 0        |      |
| SKorea     | Pigs                | 2018 | Head     | 11352612 |      |
| SKorea     | Rabbitsandhares     | 2018 | 1000Head |          | 188  |
| SKorea     | Sheep               | 2018 | Head     | 2329     |      |
| SKorea     | Turkeys             | 2018 | 1000Head | 10       |      |
| Moldova    | Asses               | 2018 | Head     | 4995     |      |
| Moldova    | Beehives            | 2018 | No       | 163589   |      |
| Moldova    | Cattle              | 2018 | Head     | 167423   |      |
| Moldova    | Chickens            | 2018 | 1000Head | 40000    |      |
| Moldova    | Goats               | 2018 | Head     | 162576   |      |
| Moldova    | Horses              | 2018 | Head     | 33579    |      |
| Moldova    | Pigs                | 2018 | Head     | 406411   |      |
| Moldova    | Rabbitsandhares     | 2018 | 1000Head |          | 376  |
| Moldova    | Sheep               | 2018 | Head     | 673149   |      |
| Moldova    | Turkeys             | 2018 | 1000Head | 151      |      |
| Réunion    | Asses               | 2018 | Head     | 9        |      |
| Réunion    | Cattle              | 2018 | Head     | 31000    |      |
| Réunion    | Chickens            | 2018 | 1000Head | 17526    |      |
| Réunion    | Ducks               | 2018 | 1000Head | 531      |      |
| Réunion    | Geeseandguineafowls | 2018 | 1000Head |          | 12   |
| Réunion    | Goats               | 2018 | Head     | 41901    |      |
| Réunion    | Horses              | 2018 | Head     | 368      |      |
| Réunion    | Mules               | 2018 | Head     | 5        |      |
| Réunion    | Pigs                | 2018 | Head     | 68829    |      |
| Réunion    | Rabbitsandhares     | 2018 | 1000Head |          | 264  |
| Réunion    | Sheep               | 2018 | Head     | 897      |      |
| Réunion    | Turkeys             | 2018 | 1000Head | 242      |      |
| Romania    | Asses               | 2018 | Head     | 30414    |      |
| Romania    | Beehives            | 2018 | No       | 1602463  |      |
| Romania    | Cattle              | 2018 | Head     | 2011109  |      |
| Romania    | Chickens            | 2018 | 1000Head | 73269    |      |
| Romania    | Ducks               | 2018 | 1000Head | 4207     |      |
| Romania    | Geeseandguineafowls | 2018 | 1000Head |          | 4710 |
| Romania    | Goats               | 2018 | Head     | 1503360  |      |
| Romania    | Horses              | 2018 | Head     | 447791   |      |
| Romania    | Pigs                | 2018 | Head     | 4406900  |      |
| Romania    | Rabbitsandhares     | 2018 | 1000Head |          | 1849 |
| Romania    | Sheep               | 2018 | Head     | 9981900  |      |
| Romania    | Turkeys             | 2018 | 1000Head | 1904     |      |
| Russia     | Asses               | 2018 | Head     | 6148     |      |
| Russia     | Beehives            | 2018 | No       | 3182399  |      |

|                                         |                      |      |          |          |      |  |  |
|-----------------------------------------|----------------------|------|----------|----------|------|--|--|
| Russia                                  | Buffaloes            | 2018 | Head     | 5311     |      |  |  |
| Russia                                  | Camels               | 2018 | Head     | 6729     |      |  |  |
| Russia                                  | Cattle               | 2018 | Head     | 18294228 |      |  |  |
| Russia                                  | Chickens             | 2018 | 1000Head | 597050   |      |  |  |
| Russia                                  | Ducks                | 2018 | 1000Head | 21863    |      |  |  |
| Russia                                  | Geeseandguinea-fowls | 2018 | 1000Head |          | 3695 |  |  |
| Russia                                  | Goats                | 2018 | Head     | 2041790  |      |  |  |
| Russia                                  | Horses               | 2018 | Head     | 1235587  |      |  |  |
| Russia                                  | Mules                | 2018 | Head     | 161      |      |  |  |
| Russia                                  | Pigs                 | 2018 | Head     | 23075510 |      |  |  |
| Russia                                  | Rabbitsandhares      | 2018 | 1000Head |          | 3745 |  |  |
| Russia                                  | Sheep                | 2018 | Head     | 22347284 |      |  |  |
| Russia                                  | Turkeys              | 2018 | 1000Head | 8981     |      |  |  |
| Rwanda                                  | Beehives             | 2018 | No       | 4209     |      |  |  |
| Rwanda                                  | Cattle               | 2018 | Head     | 1293768  |      |  |  |
| Rwanda                                  | Chickens             | 2018 | 1000head | 5442     |      |  |  |
| Rwanda                                  | Ducks                | 2018 | 1000head | 25       |      |  |  |
| Rwanda                                  | Geeseandguinea-fowls | 2018 | 1000head |          | 12   |  |  |
| Rwanda                                  | Goats                | 2018 | Head     | 2731795  |      |  |  |
| Rwanda                                  | Pigs                 | 2018 | Head     | 1330461  |      |  |  |
| Rwanda                                  | Rabbitsandhares      | 2018 | 1000Head |          | 1285 |  |  |
| Rwanda                                  | Sheep                | 2018 | Head     | 801838   |      |  |  |
| SaintHelena, AscensionandTristandacunha | Asses                | 2018 | Head     |          | 404  |  |  |
| SaintHelena, AscensionandTristandacunha | Cattle               | 2018 | Head     | 685      |      |  |  |
| SaintHelena, AscensionandTristandacunha | Chickens             | 2018 | 1000Head |          | 9    |  |  |
| SaintHelena, AscensionandTristandacunha | Goats                | 2018 | Head     | 1103     |      |  |  |
| SaintHelena, AscensionandTristandacunha | Horses               | 2018 | Head     | 0        |      |  |  |
| SaintHelena, AscensionandTristandacunha | Pigs                 | 2018 | Head     | 623      |      |  |  |
| SaintHelena, AscensionandTristandacunha | Sheep                | 2018 | Head     | 794      |      |  |  |
| SaintKittsandNevis                      | Cattle               | 2018 | Head     | 2067     |      |  |  |
| SaintKittsandNevis                      | Chickens             | 2018 | 1000Head |          | 93   |  |  |
| SaintKittsandNevis                      | Goats                | 2018 | Head     | 4309     |      |  |  |
| SaintKittsandNevis                      | Pigs                 | 2018 | Head     | 7276     |      |  |  |
| SaintKittsandNevis                      | Sheep                | 2018 | Head     | 5944     |      |  |  |
| SaintLucia                              | Asses                | 2018 | Head     | 626      |      |  |  |
| SaintLucia                              | Cattle               | 2018 | Head     | 10054    |      |  |  |
| SaintLucia                              | Chickens             | 2018 | 1000Head | 464      |      |  |  |
| SaintLucia                              | Goats                | 2018 | Head     | 13262    |      |  |  |
| SaintLucia                              | Horses               | 2018 | Head     | 1131     |      |  |  |
| SaintLucia                              | Mules                | 2018 | Head     | 1125     |      |  |  |
| SaintLucia                              | Pigs                 | 2018 | Head     | 42908    |      |  |  |
| SaintLucia                              | Sheep                | 2018 | Head     | 9064     |      |  |  |
| SaintPierreadMiquelon                   | Cattle               | 2018 | Head     | 38       |      |  |  |
| SaintPierreadMiquelon                   | Chickens             | 2018 | 1000Head |          | 44   |  |  |
| SaintPierreadMiquelon                   | Ducks                | 2018 | 1000Head |          | 1    |  |  |
| SaintPierreadMiquelon                   | Goats                | 2018 | Head     | .        |      |  |  |
| SaintPierreadMiquelon                   | Horses               | 2018 | Head     | .        |      |  |  |
| SaintPierreadMiquelon                   | Pigs                 | 2018 | Head     | .        |      |  |  |
| SaintPierreadMiquelon                   | Sheep                | 2018 | Head     | 208      |      |  |  |
| SaintVincentandtheGrenadines            | Asses                | 2018 | Head     | 1316     |      |  |  |
| SaintVincentandtheGrenadines            | Cattle               | 2018 | Head     | 3903     |      |  |  |
| SaintVincentandtheGrenadines            | Chickens             | 2018 | 1000Head |          | 251  |  |  |
| SaintVincentandtheGrenadines            | Goats                | 2018 | Head     | 9921     |      |  |  |
| SaintVincentandtheGrenadines            | Pigs                 | 2018 | Head     | 6968     |      |  |  |
| SaintVincentandtheGrenadines            | Sheep                | 2018 | Head     | 8430     |      |  |  |
| Sarba                                   | Asses                | 2018 | Head     | 7000     |      |  |  |

|                    |                     |      |          |         |  |
|--------------------|---------------------|------|----------|---------|--|
| Sarawak            | Beehives            | 2018 | No       | 11047   |  |
| Sarawak            | Cattle              | 2018 | Head     | 53151   |  |
| Sarawak            | Chickens            | 2018 | 1000Head | 501     |  |
| Sarawak            | Horses              | 2018 | Head     | 1950    |  |
| Sarawak            | Pigs                | 2018 | Head     | 164820  |  |
| SaoTomeandPrincipe | Asses               | 2018 | Head     | 47      |  |
| SaoTomeandPrincipe | Cattle              | 2018 | Head     | 1407    |  |
| SaoTomeandPrincipe | Chickens            | 2018 | 1000Head | 319     |  |
| SaoTomeandPrincipe | Ducks               | 2018 | 1000Head | 34      |  |
| SaoTomeandPrincipe | Goats               | 2018 | Head     | 6982    |  |
| SaoTomeandPrincipe | Horses              | 2018 | Head     | 303     |  |
| SaoTomeandPrincipe | Mules               | 2018 | Head     | 32      |  |
| SaoTomeandPrincipe | Pigs                | 2018 | Head     | 37300   |  |
| SaoTomeandPrincipe | Sheep               | 2018 | Head     | 3436    |  |
| SaoTomeandPrincipe | Turkeys             | 2018 | 1000Head | 3       |  |
| SaudiArabia        | Asses               | 2018 | Head     | 95767   |  |
| SaudiArabia        | Camels              | 2018 | Head     | 492672  |  |
| SaudiArabia        | Cattle              | 2018 | Head     | 265426  |  |
| SaudiArabia        | Chickens            | 2018 | 1000Head | 194536  |  |
| SaudiArabia        | Goats               | 2018 | Head     | 3708796 |  |
| SaudiArabia        | Horses              | 2018 | Head     | 28016   |  |
| SaudiArabia        | Pigeons,otherbirds  | 2018 | 1000head | 4377    |  |
| SaudiArabia        | Sheep               | 2018 | Head     | 9405766 |  |
| Senegal            | Asses               | 2018 | Head     | 485994  |  |
| Senegal            | Beehives            | 2018 | No       | 342662  |  |
| Senegal            | Camels              | 2018 | Head     | 4586    |  |
| Senegal            | Cattle              | 2018 | Head     | 3615523 |  |
| Senegal            | Chickens            | 2018 | 1000Head | 50340   |  |
| Senegal            | Goats               | 2018 | Head     | 5846143 |  |
| Senegal            | Horses              | 2018 | Head     | 553726  |  |
| Senegal            | Pigs                | 2018 | Head     | 422414  |  |
| Senegal            | Sheep               | 2018 | Head     | 6096261 |  |
| Serbia             | Beehives            | 2018 | No       | 914134  |  |
| Serbia             | Cattle              | 2018 | Head     | 678326  |  |
| Serbia             | Chickens            | 2018 | 1000Head | 15685   |  |
| Serbia             | Ducks               | 2018 | 1000Head | 166     |  |
| Serbia             | GeeseandguineaFowls | 2018 | 1000head | 75      |  |
| Serbia             | Goats               | 2018 | Head     | 195932  |  |
| Serbia             | Horses              | 2018 | Head     | 14873   |  |
| Serbia             | Pigs                | 2018 | Head     | 2782282 |  |
| Serbia             | Sheep               | 2018 | Head     | 1711677 |  |
| Serbia             | Turkeys             | 2018 | 1000Head | 207     |  |
| Seychelles         | Cattle              | 2018 | Head     | 261     |  |
| Seychelles         | Chickens            | 2018 | 1000Head | 203     |  |
| Seychelles         | Ducks               | 2018 | 1000Head | 5       |  |
| Seychelles         | Goats               | 2018 | Head     | 5666    |  |
| Seychelles         | Pigs                | 2018 | Head     | 4453    |  |
| SierraLeone        | Cattle              | 2018 | Head     | 702309  |  |
| SierraLeone        | Chickens            | 2018 | 1000Head | 12437   |  |
| SierraLeone        | Ducks               | 2018 | 1000Head | 1104    |  |
| SierraLeone        | Goats               | 2018 | Head     | 904511  |  |
| SierraLeone        | Horses              | 2018 | Head     | 440699  |  |
| SierraLeone        | Pigs                | 2018 | Head     | 47232   |  |
| SierraLeone        | Rabbitsandhares     | 2018 | 1000Head | 1693    |  |
| SierraLeone        | Sheep               | 2018 | Head     | 671388  |  |
| Singapore          | Buffaloes           | 2018 | Head     | .       |  |

|                |                     |      |          |          |        |
|----------------|---------------------|------|----------|----------|--------|
| Singapore      | Cattle              | 2018 | Head     | 179      |        |
| Singapore      | Chickens            | 2018 | 1000Head | 3724     |        |
| Singapore      | Ducks               | 2018 | 1000Head | .        |        |
| Singapore      | Goats               | 2018 | Head     | 742      |        |
| Singapore      | Pigs                | 2018 | Head     | .        |        |
| Slovakia       | Beehives            | 2018 | No       | 278385   |        |
| Slovakia       | Cattle              | 2018 | Head     | 439826   |        |
| Slovakia       | Chickens            | 2018 | 1000Head | 13030    |        |
| Slovakia       | Ducks               | 2018 | 1000Head | 164      |        |
| Slovakia       | Geeseandguineafowls | 2018 | 1000Head |          | 24     |
| Slovakia       | Goats               | 2018 | Head     | 37067    |        |
| Slovakia       | Horses              | 2018 | Head     | 6145     |        |
| Slovakia       | Pigs                | 2018 | Head     | 614384   |        |
| Slovakia       | Rabbitsandhares     | 2018 | 1000Head |          | 991    |
| Slovakia       | Sheep               | 2018 | Head     | 365344   |        |
| Slovakia       | Turkeys             | 2018 | 1000Head | 136      |        |
| Slovenia       | Beehives            | 2018 | No       | 55733    |        |
| Slovenia       | Cattle              | 2018 | Head     | 479614   |        |
| Slovenia       | Chickens            | 2018 | 1000Head | 3666     |        |
| Slovenia       | Ducks               | 2018 | 1000Head | 17       |        |
| Slovenia       | Geeseandguineafowls | 2018 | 1000Head |          | 3      |
| Slovenia       | Goats               | 2018 | Head     | 25217    |        |
| Slovenia       | Horses              | 2018 | Head     | 21917    |        |
| Slovenia       | Pigs                | 2018 | Head     | 257241   |        |
| Slovenia       | Rabbitsandhares     | 2018 | 1000Head |          | 90     |
| Slovenia       | Sheep               | 2018 | Head     | 106761   |        |
| Slovenia       | Turkeys             | 2018 | 1000Head | 148      |        |
| SolomonIslands | Cattle              | 2018 | Head     | 15446    |        |
| SolomonIslands | Chickens            | 2018 | 1000Head |          | 246    |
| SolomonIslands | Horses              | 2018 | Head     | 152      |        |
| SolomonIslands | Pigs                | 2018 | Head     | 54435    |        |
| Somalia        | Asses               | 2018 | Head     | 22776    |        |
| Somalia        | Camels              | 2018 | Head     | 7243771  |        |
| Somalia        | Cattle              | 2018 | Head     | 4748973  |        |
| Somalia        | Chickens            | 2018 | 1000Head | 3693     |        |
| Somalia        | Goats               | 2018 | Head     | 11536738 |        |
| Somalia        | Horses              | 2018 | Head     | 893      |        |
| Somalia        | Mules               | 2018 | Head     | 22141    |        |
| Somalia        | Pigs                | 2018 | Head     | 5745     |        |
| Somalia        | Sheep               | 2018 | Head     | 10649679 |        |
| SouthAfrica    | Asses               | 2018 | Head     | 144908   |        |
| SouthAfrica    | Beehives            | 2018 | No       | 71069    |        |
| SouthAfrica    | Cattle              | 2018 | Head     | 12789515 |        |
| SouthAfrica    | Chickens            | 2018 | 1000Head |          | 176261 |
| SouthAfrica    | Ducks               | 2018 | 1000Head | 413      |        |
| SouthAfrica    | Geeseandguineafowls | 2018 | 1000Head |          | 142    |
| SouthAfrica    | Goats               | 2018 | Head     | 5404600  |        |
| SouthAfrica    | Horses              | 2018 | Head     | 325806   |        |
| SouthAfrica    | Mules               | 2018 | Head     | 16291    |        |
| SouthAfrica    | Pigs                | 2018 | Head     | 1463612  |        |
| SouthAfrica    | Sheep               | 2018 | Head     | 22650072 |        |
| SouthAfrica    | Turkeys             | 2018 | 1000Head |          | 543    |
| SouthSudan     | Asses               | 2018 | Head     | 384470   |        |
| SouthSudan     | Beehives            | 2018 | No       | .        |        |
| SouthSudan     | Camels              | 2018 | Head     | .        |        |
| SouthSudan     | Cattle              | 2018 | Head     | 12074116 |        |

|             |                     |      |          |          |    |
|-------------|---------------------|------|----------|----------|----|
| SouthSudan  | Chickens            | 2018 | 1000Head | 15000    |    |
| SouthSudan  | Goats               | 2018 | Head     | 13547848 |    |
| SouthSudan  | Horses              | 2018 | Head     | .        |    |
| SouthSudan  | Mules               | 2018 | Head     | .        |    |
| SouthSudan  | Sheep               | 2018 | Head     | 16277418 |    |
| Spain       | Asses               | 2018 | Head     | 140816   |    |
| Spain       | Beehives            | 2018 | No       | 2965557  |    |
| Spain       | Cattle              | 2018 | Head     | 6510592  |    |
| Spain       | Chickens            | 2018 | 1000Head | 137164   |    |
| Spain       | Geeseandguineafowls | 2018 | 1000Head |          | 20 |
| Spain       | Goats               | 2018 | Head     | 2784790  |    |
| Spain       | Horses              | 2018 | Head     | 283158   |    |
| Spain       | Mules               | 2018 | Head     | 109306   |    |
| Spain       | Pigs                | 2018 | Head     | 30604102 |    |
| Spain       | Sheep               | 2018 | Head     | 15852525 |    |
| SriLanka    | Buffaloes           | 2018 | Head     | 308790   |    |
| SriLanka    | Cattle              | 2018 | Head     | 1110740  |    |
| SriLanka    | Chickens            | 2018 | 1000Head | 20501    |    |
| SriLanka    | Ducks               | 2018 | 1000Head | 12       |    |
| SriLanka    | Goats               | 2018 | Head     | 314800   |    |
| SriLanka    | Horses              | 2018 | Head     | 1370     |    |
| SriLanka    | Pigs                | 2018 | Head     | 97990    |    |
| SriLanka    | Sheep               | 2018 | Head     | 11382    |    |
| Sudan       | Asses               | 2018 | Head     | 7626854  |    |
| Sudan       | Beehives            | 2018 | No       | 76110    |    |
| Sudan       | Camels              | 2018 | Head     | 4872000  |    |
| Sudan       | Cattle              | 2018 | Head     | 31223000 |    |
| Sudan       | Chickens            | 2018 | 1000Head | 40294    |    |
| Sudan       | Goats               | 2018 | Head     | 31837000 |    |
| Sudan       | Horses              | 2018 | Head     | 791668   |    |
| Sudan       | Mules               | 2018 | Head     | 638      |    |
| Sudan       | Sheep               | 2018 | Head     | 40846000 |    |
| Suriname    | Asses               | 2018 | Head     | 5        |    |
| Suriname    | Buffaloes           | 2018 | Head     | 905      |    |
| Suriname    | Cattle              | 2018 | Head     | 34341    |    |
| Suriname    | Chickens            | 2018 | 1000Head | 6362     |    |
| Suriname    | Ducks               | 2018 | 1000Head | 400      |    |
| Suriname    | Goats               | 2018 | Head     | 3622     |    |
| Suriname    | Horses              | 2018 | Head     | 254      |    |
| Suriname    | Pigs                | 2018 | Head     | 32608    |    |
| Suriname    | Sheep               | 2018 | Head     | 5883     |    |
| Sweden      | Beehives            | 2018 | No       | 90826    |    |
| Sweden      | Cattle              | 2018 | Head     | 1433450  |    |
| Sweden      | Chickens            | 2018 | 1000Head | 9196     |    |
| Sweden      | Horses              | 2018 | Head     | 102034   |    |
| Sweden      | Pigs                | 2018 | Head     | 1471200  |    |
| Sweden      | Sheep               | 2018 | Head     | 860120   |    |
| Sweden      | Turkeys             | 2018 | 1000Head | 93       |    |
| Switzerland | Asses               | 2018 | Head     | 34028    |    |
| Switzerland | Beehives            | 2018 | No       | 179704   |    |
| Switzerland | Cattle              | 2018 | Head     | 1543345  |    |
| Switzerland | Chickens            | 2018 | 1000Head | 11636    |    |
| Switzerland | Ducks               | 2018 | 1000Head | 4        |    |
| Switzerland | Geeseandguineafowls | 2018 | 1000Head |          | 3  |
| Switzerland | Goats               | 2018 | Head     | 80652    |    |
| Switzerland | Horses              | 2018 | Head     | 45906    |    |

|                    |                     |      |          |          |    |
|--------------------|---------------------|------|----------|----------|----|
| Switzerland        | Mules               | 2018 | Head     | 719      |    |
| Switzerland        | Pigs                | 2018 | Head     | 1417549  |    |
| Switzerland        | Rabbitsandhares     | 2018 | 1000Head | 1000     | 62 |
| Switzerland        | Sheep               | 2018 | Head     | 343470   |    |
| Switzerland        | Turkeys             | 2018 | 1000Head | 84       |    |
| SyrianArabRepublic | Asses               | 2018 | Head     | 79000    |    |
| SyrianArabRepublic | Beehives            | 2018 | No       | 500000   |    |
| SyrianArabRepublic | Buffaloes           | 2018 | Head     | 8000     |    |
| SyrianArabRepublic | Camels              | 2018 | Head     | 56140    |    |
| SyrianArabRepublic | Cattle              | 2018 | Head     | 1090000  |    |
| SyrianArabRepublic | Chickens            | 2018 | 1000Head | 18600    |    |
| SyrianArabRepublic | Ducks               | 2018 | 1000Head | 47       |    |
| SyrianArabRepublic | Geeseandguineafowls | 2018 | 1000Head | 1000     | 52 |
| SyrianArabRepublic | Goats               | 2018 | Head     | 2286000  |    |
| SyrianArabRepublic | Horses              | 2018 | Head     | 13411    |    |
| SyrianArabRepublic | Mules               | 2018 | Head     | 2450     |    |
| SyrianArabRepublic | Pigeons,otherbirds  | 2018 | 1000head | 1348     |    |
| SyrianArabRepublic | Pigs                | 2018 | Head     | 13       |    |
| SyrianArabRepublic | Rabbitsandhares     | 2018 | 1000Head | 121      |    |
| SyrianArabRepublic | Sheep               | 2018 | Head     | 17718582 |    |
| SyrianArabRepublic | Turkeys             | 2018 | 1000head | 191      |    |
| Tajikistan         | Asses               | 2018 | Head     | 136676   |    |
| Tajikistan         | Beehives            | 2018 | No       | 223262   |    |
| Tajikistan         | Buffaloes           | 2018 | Head     | 15351    |    |
| Tajikistan         | Camels              | 2018 | Head     | 63       |    |
| Tajikistan         | Cattle              | 2018 | Head     | 2327531  |    |
| Tajikistan         | Chickens            | 2018 | 1000Head | 6536     |    |
| Tajikistan         | Goats               | 2018 | Head     | 1925329  |    |
| Tajikistan         | Horses              | 2018 | Head     | 80791    |    |
| Tajikistan         | Pigs                | 2018 | Head     | 193      |    |
| Tajikistan         | Rabbitsandhares     | 2018 | 1000Head | 79       |    |
| Tajikistan         | Sheep               | 2018 | Head     | 3666729  |    |
| Thailand           | Asses               | 2018 | Head     | 30       |    |
| Thailand           | Buffaloes           | 2018 | Head     | 1258272  |    |
| Thailand           | Cattle              | 2018 | Head     | 4656654  |    |
| Thailand           | Chickens            | 2018 | 1000Head | 281684   |    |
| Thailand           | Ducks               | 2018 | 1000Head | 12373    |    |
| Thailand           | Geeseandguineafowls | 2018 | 1000head | 217      |    |
| Thailand           | Goats               | 2018 | Head     | 474812   |    |
| Thailand           | Horses              | 2018 | Head     | 6089     |    |
| Thailand           | Mules               | 2018 | Head     | 49       |    |
| Thailand           | Pigs                | 2018 | Head     | 7908775  |    |
| Thailand           | Sheep               | 2018 | Head     | 40661    |    |
| Timor-Leste        | Beehives            | 2018 | No       | 20200    |    |
| Timor-Leste        | Buffaloes           | 2018 | Head     | 125760   |    |
| Timor-Leste        | Cattle              | 2018 | Head     | 209104   |    |
| Timor-Leste        | Chickens            | 2018 | 1000Head | 943      |    |
| Timor-Leste        | Goats               | 2018 | Head     | 138773   |    |
| Timor-Leste        | Horses              | 2018 | Head     | 48466    |    |
| Timor-Leste        | Pigs                | 2018 | Head     | 392281   |    |
| Timor-Leste        | Sheep               | 2018 | Head     | 47085    |    |
| Togo               | Asses               | 2018 | Head     | 3414     |    |
| Togo               | Cattle              | 2018 | Head     | 453088   |    |
| Togo               | Chickens            | 2018 | 1000Head | 27400    |    |
| Togo               | Goats               | 2018 | Head     | 3944963  |    |
| Togo               | Horses              | 2018 | Head     | 1655     |    |

|                   |                     |      |          |          |        |
|-------------------|---------------------|------|----------|----------|--------|
| Togo              | Pigs                | 2018 | Head     | 1057079  |        |
| Togo              | Rabbitsandhares     | 2018 | 1000Head |          |        |
| Togo              | Sheep               | 2018 | Head     | 1552087  |        |
| Tokelau           | Chickens            | 2018 | 1000Head |          | 5      |
| Tokelau           | Pigs                | 2018 | Head     | 1000     |        |
| Tonga             | Beehives            | 2018 | No       | 956      |        |
| Tonga             | Cattle              | 2018 | Head     | 11933    |        |
| Tonga             | Chickens            | 2018 | 1000Head |          | 345    |
| Tonga             | Goats               | 2018 | Head     | 15532    |        |
| Tonga             | Horses              | 2018 | Head     | 11800    |        |
| Tonga             | Pigs                | 2018 | Head     | 62023    |        |
| TrinidadandTobago | Asses               | 2018 | Head     |          | 2341   |
| TrinidadandTobago | Beehives            | 2018 | No       | 7780     |        |
| TrinidadandTobago | Buffaloes           | 2018 | Head     |          | 6145   |
| TrinidadandTobago | Cattle              | 2018 | Head     | 36303    |        |
| TrinidadandTobago | Chickens            | 2018 | 1000head |          | 37917  |
| TrinidadandTobago | Goats               | 2018 | Head     | 6388     |        |
| TrinidadandTobago | Horses              | 2018 | Head     | 1428     |        |
| TrinidadandTobago | Mules               | 2018 | Head     | 2032     |        |
| TrinidadandTobago | Pigs                | 2018 | Head     | 25910    |        |
| TrinidadandTobago | Rabbitsandhares     | 2018 | 1000Head |          | 5      |
| TrinidadandTobago | Sheep               | 2018 | Head     | 14152    |        |
| Tunisia           | Asses               | 2018 | Head     | 242415   |        |
| Tunisia           | Beehives            | 2018 | No       | 632733   |        |
| Tunisia           | Camels              | 2018 | Head     | 237150   |        |
| Tunisia           | Cattle              | 2018 | Head     | 648620   |        |
| Tunisia           | Chickens            | 2018 | 1000Head |          | 92567  |
| Tunisia           | Goats               | 2018 | Head     | 1192383  |        |
| Tunisia           | Horses              | 2018 | Head     | 57258    |        |
| Tunisia           | Mules               | 2018 | Head     | 82074    |        |
| Tunisia           | Pigs                | 2018 | Head     | 5413     |        |
| Tunisia           | Sheep               | 2018 | Head     | 6434939  |        |
| Tunisia           | Turkeys             | 2018 | 1000Head |          | 10257  |
| Turkey            | Asses               | 2018 | Head     | 141375   |        |
| Turkey            | Beehives            | 2018 | No       | 7947687  |        |
| Turkey            | Buffaloes           | 2018 | Head     | 161439   |        |
| Turkey            | Camels              | 2018 | Head     | 1703     |        |
| Turkey            | Cattle              | 2018 | Head     | 15943586 |        |
| Turkey            | Chickens            | 2018 | 1000head |          | 353561 |
| Turkey            | Ducks               | 2018 | 1000Head |          | 523    |
| Turkey            | GeeseandguineaFowls | 2018 | 1000Head |          | 1090   |
| Turkey            | Goats               | 2018 | Head     | 10634672 |        |
| Turkey            | Horses              | 2018 | Head     | 114047   |        |
| Turkey            | Mules               | 2018 | Head     | 34390    |        |
| Turkey            | Pigs                | 2018 | Head     | 1361     |        |
| Turkey            | Rabbitsandhares     | 2018 | 1000Head |          | 50     |
| Turkey            | Sheep               | 2018 | Head     | 33677636 |        |
| Turkey            | Turkeys             | 2018 | 1000Head |          | 4043   |
| Turkmenistan      | Asses               | 2018 | Head     | 24882    |        |
| Turkmenistan      | Camels              | 2018 | Head     | 129670   |        |
| Turkmenistan      | Cattle              | 2018 | Head     | 2217448  |        |
| Turkmenistan      | Chickens            | 2018 | 1000Head |          | 16877  |
| Turkmenistan      | Goats               | 2018 | Head     | 2371547  |        |
| Turkmenistan      | Horses              | 2018 | Head     | 25903    |        |
| Turkmenistan      | Pigs                | 2018 | Head     | 9217     |        |
| Turkmenistan      | Sheep               | 2018 | Head     | 14074027 |        |

|                          |                     |      |          |          |  |
|--------------------------|---------------------|------|----------|----------|--|
| Turkmenistan             | Turkeys             | 2018 | 1000Head | 552      |  |
| Tuvalu                   | Beehives            | 2018 | No       | 38       |  |
| Tuvalu                   | Chickens            | 2018 | 1000Head | 55       |  |
| Tuvalu                   | Goats               | 2018 | Head     | .        |  |
| Tuvalu                   | Pigs                | 2018 | Head     | 14134    |  |
| Uganda                   | Asses               | 2018 | Head     | 19540    |  |
| Uganda                   | Beehives            | 2018 | No       | 81271    |  |
| Uganda                   | Cattle              | 2018 | Head     | 15767794 |  |
| Uganda                   | Chickens            | 2018 | 1000Head | 37039    |  |
| Uganda                   | Goats               | 2018 | Head     | 16196402 |  |
| Uganda                   | Pigs                | 2018 | Head     | 2730847  |  |
| Uganda                   | Sheep               | 2018 | Head     | 2094428  |  |
| Ukraine                  | Asses               | 2018 | Head     | 11957    |  |
| Ukraine                  | Beehives            | 2018 | No       | 2642     |  |
| Ukraine                  | Camels              | 2018 | Head     | 831      |  |
| Ukraine                  | Cattle              | 2018 | Head     | 3530803  |  |
| Ukraine                  | Chickens            | 2018 | 1000Head | 188737   |  |
| Ukraine                  | Ducks               | 2018 | 1000Head | 10954    |  |
| Ukraine                  | Geeseandguineafowls | 2018 | 1000Head | 4117     |  |
| Ukraine                  | Goats               | 2018 | Head     | 582100   |  |
| Ukraine                  | Horses              | 2018 | Head     | 264900   |  |
| Ukraine                  | Pigs                | 2018 | Head     | 6109900  |  |
| Ukraine                  | Rabbitsandhares     | 2018 | 1000Head | 4700     |  |
| Ukraine                  | Sheep               | 2018 | Head     | 727200   |  |
| Ukraine                  | Turkeys             | 2018 | 1000Head | 1951     |  |
| UnitedArabEmirates       | Camels              | 2018 | Head     | 457526   |  |
| UnitedArabEmirates       | Cattle              | 2018 | Head     | 104969   |  |
| UnitedArabEmirates       | Chickens            | 2018 | 1000Head | 24007    |  |
| UnitedArabEmirates       | Goats               | 2018 | Head     | 2395166  |  |
| UnitedArabEmirates       | Horses              | 2018 | Head     | 442      |  |
| UnitedArabEmirates       | Rabbitsandhares     | 2018 | 1000Head |          |  |
| UnitedArabEmirates       | Sheep               | 2018 | Head     | 2147665  |  |
| UK                       | Beehives            | 2018 | No       | .        |  |
| UK                       | Cattle              | 2018 | Head     | 9892000  |  |
| UK                       | Chickens            | 2018 | 1000Head | 179003   |  |
| UK                       | Ducks               | 2018 | 1000Head | 2084     |  |
| UK                       | Geeseandguineafowls | 2018 | 1000Head | 162      |  |
| UK                       | Goats               | 2018 | Head     | 104000   |  |
| UK                       | Horses              | 2018 | Head     | 419691   |  |
| UK                       | Pigs                | 2018 | Head     | 5055300  |  |
| UK                       | Sheep               | 2018 | Head     | 33781000 |  |
| UK                       | Turkeys             | 2018 | 1000Head | 4100     |  |
| UnitedRepublicofTanzania | Asses               | 2018 | Head     | 187661   |  |
| UnitedRepublicofTanzania | Beehives            | 2018 | No       | 3019784  |  |
| UnitedRepublicofTanzania | Cattle              | 2018 | Head     | 27427668 |  |
| UnitedRepublicofTanzania | Chickens            | 2018 | 1000Head | 37963    |  |
| UnitedRepublicofTanzania | Ducks               | 2018 | 1000Head | 1389     |  |
| UnitedRepublicofTanzania | Goats               | 2018 | Head     | 18385463 |  |
| UnitedRepublicofTanzania | Pigs                | 2018 | Head     | 621716   |  |
| UnitedRepublicofTanzania | Sheep               | 2018 | Head     | 7782332  |  |
| USA                      | Asses               | 2018 | Head     | 51973    |  |
| USA                      | Beehives            | 2018 | No       | 2803000  |  |
| USA                      | Cattle              | 2018 | Head     | 94296000 |  |
| USA                      | Chickens            | 2018 | 1000Head | 1973380  |  |
| USA                      | Ducks               | 2018 | 1000Head | 7373     |  |
| USA                      | Goats               | 2018 | Head     | 2639000  |  |



|                                 |                     |      |          |          |        |  |
|---------------------------------|---------------------|------|----------|----------|--------|--|
| USA                             | Horses              | 2018 | Head     | 10479248 |        |  |
| USA                             | Mules               | 2018 | Head     | 295      |        |  |
| USA                             | Pigs                | 2018 | Head     | 74550200 |        |  |
| USA                             | Sheep               | 2018 | Head     | 5265000  |        |  |
| USA                             | Turkeys             | 2018 | 1000Head | 244753   |        |  |
| UnitedStatesVirginIslands       | Asses               | 2018 | Head     |          | 56     |  |
| UnitedStatesVirginIslands       | Cattle              | 2018 | Head     |          | 8129   |  |
| UnitedStatesVirginIslands       | Chickens            | 2018 | 1000Head |          | 43     |  |
| UnitedStatesVirginIslands       | Goats               | 2018 | Head     | 4134     |        |  |
| UnitedStatesVirginIslands       | Horses              | 2018 | Head     | 306      |        |  |
| UnitedStatesVirginIslands       | Mules               | 2018 | Head     | 4        |        |  |
| UnitedStatesVirginIslands       | Pigs                | 2018 | Head     | 2887     |        |  |
| UnitedStatesVirginIslands       | Sheep               | 2018 | Head     |          | 3284   |  |
| Uruguay                         | Asses               | 2018 | Head     | 1657     |        |  |
| Uruguay                         | Beehives            | 2018 | No       | 595107   |        |  |
| Uruguay                         | Cattle              | 2018 | Head     | 11488030 |        |  |
| Uruguay                         | Chickens            | 2018 | 1000Head | 31878    |        |  |
| Uruguay                         | Ducks               | 2018 | 1000Head | 204      |        |  |
| Uruguay                         | Geeseandguineafowls | 2018 | 1000Head |          | 57     |  |
| Uruguay                         | Goats               | 2018 | Head     | 17938    |        |  |
| Uruguay                         | Horses              | 2018 | Head     | 40881    |        |  |
| Uruguay                         | Mules               | 2018 | Head     | 4080     |        |  |
| Uruguay                         | Pigs                | 2018 | Head     | 130334   |        |  |
| Uruguay                         | Rabbitsandhares     | 2018 | 1000Head |          | 64     |  |
| Uruguay                         | Sheep               | 2018 | Head     | 6392000  |        |  |
| Uruguay                         | Turkeys             | 2018 | 1000Head | 134      |        |  |
| Uzbekistan                      | Asses               | 2018 | Head     | 222975   |        |  |
| Uzbekistan                      | Beehives            | 2018 | No       | 574153   |        |  |
| Uzbekistan                      | Camels              | 2018 | Head     | 19426    |        |  |
| Uzbekistan                      | Cattle              | 2018 | Head     | 12814000 |        |  |
| Uzbekistan                      | Chickens            | 2018 | 1000Head | 53285    |        |  |
| Uzbekistan                      | Goats               | 2018 | Head     | 3806000  |        |  |
| Uzbekistan                      | Horses              | 2018 | Head     | 242470   |        |  |
| Uzbekistan                      | Pigs                | 2018 | Head     | 58056    |        |  |
| Uzbekistan                      | Rabbitsandhares     | 2018 | 1000Head |          | 507    |  |
| Uzbekistan                      | Sheep               | 2018 | Head     | 17775000 |        |  |
| Uzbekistan                      | Turkeys             | 2018 | 1000Head | 666      |        |  |
| Vanuatu                         | Cattle              | 2018 | Head     | 176738   |        |  |
| Vanuatu                         | Chickens            | 2018 | 1000Head | 878      |        |  |
| Vanuatu                         | Goats               | 2018 | Head     | 28137    |        |  |
| Vanuatu                         | Horses              | 2018 | Head     | 7253     |        |  |
| Vanuatu                         | Pigs                | 2018 | Head     | 100581   |        |  |
| Venezuela(BolivarianRepublicof) | Asses               | 2018 | Head     | 440300   |        |  |
| Venezuela(BolivarianRepublicof) | Beehives            | 2018 | No       | 11269    |        |  |
| Venezuela(BolivarianRepublicof) | Cattle              | 2018 | Head     | 16969156 |        |  |
| Venezuela(BolivarianRepublicof) | Chickens            | 2018 | 1000Head |          | 121811 |  |
| Venezuela(BolivarianRepublicof) | Goats               | 2018 | Head     | 1321166  |        |  |
| Venezuela(BolivarianRepublicof) | Horses              | 2018 | Head     | 522498   |        |  |
| Venezuela(BolivarianRepublicof) | Mules               | 2018 | Head     | 72030    |        |  |
| Venezuela(BolivarianRepublicof) | Pigs                | 2018 | Head     | 3687442  |        |  |
| Venezuela(BolivarianRepublicof) | Rabbitsandhares     | 2018 | 1000Head |          | 465    |  |
| Venezuela(BolivarianRepublicof) | Sheep               | 2018 | Head     | 610553   |        |  |
| VietNam                         | Beehives            | 2018 | No       | 283786   |        |  |
| VietNam                         | Buffaloes           | 2018 | Head     | 2425106  |        |  |
| VietNam                         | Cattle              | 2018 | Head     | 5802907  |        |  |
| VietNam                         | Chickens            | 2018 | 1000Head | 316918   |        |  |

```

VietNam    Ducks    2018    1000Head    78011
VietNam    Goats    2018    Head    2683942
VietNam    Horses    2018    Head    53473
VietNam    Pigs    2018    Head    29151948
WallisandFutunaIslands    Beehives    2018    No    643
WallisandFutunaIslands    Cattle    2018    Head    60
WallisandFutunaIslands    Chickens    2018    1000Head    65
WallisandFutunaIslands    Goats    2018    Head    7000
WallisandFutunaIslands    Horses    2018    Head    185
WallisandFutunaIslands    Pigs    2018    Head    29100
WesternSahara    Asses    2018    Head    524
WesternSahara    Camels    2018    Head    111849
WesternSahara    Cattle    2018    Head    .
WesternSahara    Goats    2018    Head    180293
WesternSahara    Sheep    2018    Head    37147
Yemen    Asses    2018    Head    734893
Yemen    Beehives    2018    No    155753
Yemen    Camels    2018    Head    471040
Yemen    Cattle    2018    Head    1792597
Yemen    Chickens    2018    1000Head    88434
Yemen    Goats    2018    Head    9497268
Yemen    Horses    2018    Head    1940
Yemen    Sheep    2018    Head    9861574
Zambia    Asses    2018    Head    2169
Zambia    Beehives    2018    No    61021
Zambia    Cattle    2018    Head    4172422
Zambia    Chickens    2018    1000Head    41024
Zambia    Goats    2018    Head    2823147
Zambia    Pigs    2018    Head    1210397
Zambia    Sheep    2018    Head    261987
Zimbabwe    Asses    2018    Head    585048
Zimbabwe    Cattle    2018    Head    5446674
Zimbabwe    Chickens    2018    1000Head    20149
Zimbabwe    Ducks    2018    1000Head    86
Zimbabwe    Goats    2018    Head    4858342
Zimbabwe    Horses    2018    Head    28256
Zimbabwe    Mules    2018    Head    1251
Zimbabwe    Pigs    2018    Head    267068
Zimbabwe    Sheep    2018    Head    436820
Zimbabwe    Turkeys    2018    1000Head    29
;
run;

proc means;
run;

proc freq;
run;
/***** DATA CROP *****/

data crop;
input country $ element $ year unit $ quantity;
cards;

```

|                   |                             |      |        |          |        |     |
|-------------------|-----------------------------|------|--------|----------|--------|-----|
| Afghanistan       | Apples                      | 2018 | tonnes | 217182   |        |     |
| Afghanistan       | Barley                      | 2018 | tonnes | 56781    |        |     |
| Afghanistan       | Grapes                      | 2018 | tonnes | 984081   |        |     |
| Afghanistan       | Maize                       | 2018 | tonnes | 106670   |        |     |
| Afghanistan       | Pistachios                  | 2018 | tonnes | 2734     |        |     |
| Afghanistan       | Potatoes                    | 2018 | tonnes | 615684   |        |     |
| Afghanistan       | Rice, paddy                 | 2018 | tonnes | 352177   |        |     |
| Afghanistan       | Wheat                       | 2018 | tonnes | 3613300  |        |     |
| Albania           | Apples                      | 2018 | tonnes | 108375   |        |     |
| Albania           | Barley                      | 2018 | tonnes | 9655     |        |     |
| Albania           | Grapes                      | 2018 | tonnes | 184832   |        |     |
| Albania           | Maize                       | 2018 | tonnes | 391104   |        |     |
| Albania           | Potatoes                    | 2018 | tonnes | 254543   |        |     |
| Albania           | Pumpkins, squash&handgourds | 2018 | tonnes |          | 18483  |     |
| Albania           | Rice, paddy                 | 2018 | tonnes | 0        |        |     |
| Albania           | Soybeans                    | 2018 | tonnes | 744      |        |     |
| Albania           | wheat                       | 2018 | tonnes | 240294   |        |     |
| Algeria           | Apples                      | 2018 | tonnes | 487808   |        |     |
| Algeria           | Barley                      | 2018 | tonnes | 1957327  |        |     |
| Algeria           | Grapes                      | 2018 | tonnes | 502978   |        |     |
| Algeria           | Maize                       | 2018 | tonnes | 4142     |        |     |
| Algeria           | Peas, dry                   | 2018 | tonnes | 11472    |        |     |
| Algeria           | Potatoes                    | 2018 | tonnes | 4653322  |        |     |
| Algeria           | Pumpkins, squash&handgourds | 2018 | tonnes |          | 388875 |     |
| Algeria           | Rice, paddy                 | 2018 | tonnes | 313      |        |     |
| Algeria           | Wheat                       | 2018 | tonnes | 3881210  |        |     |
| Angola            | Maize                       | 2018 | tonnes | 2271102  |        |     |
| Angola            | Potatoes                    | 2018 | tonnes | 806552   |        |     |
| Angola            | Rice, paddy                 | 2018 | tonnes | 55441    |        |     |
| Angola            | Soybeans                    | 2018 | tonnes | 11557    |        |     |
| Angola            | Wheat                       | 2018 | tonnes | 2820     |        |     |
| AntiguaandBarbuda | Maize                       | 2018 | tonnes |          | 73     |     |
| AntiguaandBarbuda | Pumpkins, squash&handgourds | 2018 | tonnes |          |        | 360 |
| Argentina         | Apples                      | 2018 | tonnes | 510478   |        |     |
| Argentina         | Barley                      | 2018 | tonnes | 5081069  |        |     |
| Argentina         | Grapes                      | 2018 | tonnes | 2573311  |        |     |
| Argentina         | Maize                       | 2018 | tonnes | 43482323 |        |     |
| Argentina         | Peas, dry                   | 2018 | tonnes | 109735   |        |     |
| Argentina         | Potatoes                    | 2018 | tonnes | 2340100  |        |     |
| Argentina         | Pumpkins, squash&handgourds | 2018 | tonnes |          | 267450 |     |
| Argentina         | Rice, paddy                 | 2018 | tonnes | 1367968  |        |     |
| Argentina         | Safflowerseed               | 2018 | tonnes | 27839    |        |     |
| Argentina         | Soybeans                    | 2018 | tonnes | 37787927 |        |     |
| Argentina         | Wheat                       | 2018 | tonnes | 18518045 |        |     |
| Armenia           | Apples                      | 2018 | tonnes | 109638   |        |     |
| Armenia           | Barley                      | 2018 | tonnes | 124167   |        |     |
| Armenia           | Grapes                      | 2018 | tonnes | 179668   |        |     |
| Armenia           | Maize                       | 2018 | tonnes | 7615     |        |     |
| Armenia           | Peas, dry                   | 2018 | tonnes | 127      |        |     |
| Armenia           | Potatoes                    | 2018 | tonnes | 415050   |        |     |
| Armenia           | Rice, paddy                 | 2018 | tonnes |          |        |     |
| Armenia           | Wheat                       | 2018 | tonnes | 187453   |        |     |
| Australia         | Apples                      | 2018 | tonnes | 268355   |        |     |
| Australia         | Barley                      | 2018 | tonnes | 9253862  |        |     |
| Australia         | Grapes                      | 2018 | tonnes | 1683567  |        |     |
| Australia         | Maize                       | 2018 | tonnes | 387240   |        |     |

|            |                          |      |        |          |  |
|------------|--------------------------|------|--------|----------|--|
| Australia  | Peas,dry                 | 2018 | tonnes | 317209   |  |
| Australia  | Pistachios               | 2018 | tonnes | 1629     |  |
| Australia  | Potatoes                 | 2018 | tonnes | 1188655  |  |
| Australia  | Pumpkins,squashandgourds | 2018 | tonnes | 92707    |  |
| Australia  | Rice,paddy               | 2018 | tonnes | 695113   |  |
| Australia  | Safflowerseed            | 2018 | tonnes | 4892     |  |
| Australia  | Soybeans                 | 2018 | tonnes | 63000    |  |
| Australia  | Wheat                    | 2018 | tonnes | 20041134 |  |
| Austria    | Apples                   | 2018 | tonnes | 387954   |  |
| Austria    | Barley                   | 2018 | tonnes | 695072   |  |
| Austria    | Grapes                   | 2018 | tonnes | 367131   |  |
| Austria    | Maize                    | 2018 | tonnes | 2130339  |  |
| Austria    | Peas,dry                 | 2018 | tonnes | 16501    |  |
| Austria    | Potatoes                 | 2018 | tonnes | 697931   |  |
| Austria    | Pumpkins,squashandgourds | 2018 | tonnes | 20966    |  |
| Austria    | Soybeans                 | 2018 | tonnes | 184342   |  |
| Austria    | wheat                    | 2018 | tonnes | 1370980  |  |
| Azerbaijan | Apples                   | 2018 | tonnes | 277158   |  |
| Azerbaijan | Barley                   | 2018 | tonnes | 916036   |  |
| Azerbaijan | Grapes                   | 2018 | tonnes | 187591   |  |
| Azerbaijan | Maize                    | 2018 | tonnes | 247939   |  |
| Azerbaijan | Peas,dry                 | 2018 | tonnes | 26632    |  |
| Azerbaijan | Pistachios               | 2018 | tonnes | 22       |  |
| Azerbaijan | Potatoes                 | 2018 | tonnes | 692214   |  |
| Azerbaijan | Pumpkins,squashandgourds | 2018 | tonnes | 27930    |  |
| Azerbaijan | Rice,paddy               | 2018 | tonnes | 11975    |  |
| Azerbaijan | Soybeans                 | 2018 | tonnes | 41       |  |
| Azerbaijan | Wheat                    | 2018 | tonnes | 1021663  |  |
| Bahamas    | Maize                    | 2018 | tonnes | 742      |  |
| Bahamas    | Potatoes                 | 2018 | tonnes |          |  |
| Bahamas    | Pumpkins,squashandgourds | 2018 | tonnes | 2103     |  |
| Bahrain    | Grapes                   | 2018 | tonnes | 151      |  |
| Bahrain    | Potatoes                 | 2018 | tonnes | 60       |  |
| Bahrain    | Pumpkins,squashandgourds | 2018 | tonnes | 537      |  |
| Bangladesh | Barley                   | 2018 | tonnes | 244      |  |
| Bangladesh | Maize                    | 2018 | tonnes | 3288102  |  |
| Bangladesh | Peas,dry                 | 2018 | tonnes | 17429    |  |
| Bangladesh | Potatoes                 | 2018 | tonnes | 9744412  |  |
| Bangladesh | Pumpkins,squashandgourds | 2018 | tonnes | 303273   |  |
| Bangladesh | Rice,paddy               | 2018 | tonnes | 56417319 |  |
| Bangladesh | Soybeans                 | 2018 | tonnes | 88669    |  |
| Bangladesh | Wheat                    | 2018 | tonnes | 1098373  |  |
| Barbados   | Maize                    | 2018 | tonnes | 109      |  |
| Barbados   | Pumpkins,squashandgourds | 2018 | tonnes | 782      |  |
| Belarus    | Apples                   | 2018 | tonnes | 700198   |  |
| Belarus    | Barley                   | 2018 | tonnes | 944341   |  |
| Belarus    | Grapes                   | 2018 | tonnes | 15233    |  |
| Belarus    | Maize                    | 2018 | tonnes | 1137932  |  |
| Belarus    | Peas,dry                 | 2018 | tonnes | 67988    |  |
| Belarus    | Potatoes                 | 2018 | tonnes | 6865123  |  |
| Belarus    | Wheat                    | 2018 | tonnes | 1814765  |  |
| Belgium    | Apples                   | 2018 | tonnes | 273950   |  |
| Belgium    | Barley                   | 2018 | tonnes | 320395   |  |
| Belgium    | Grapes                   | 2018 | tonnes | 2881     |  |
| Belgium    | Maize                    | 2018 | tonnes | 442995   |  |
| Belgium    | Peas,dry                 | 2018 | tonnes | 2555     |  |

|                      |                          |      |        |           |        |
|----------------------|--------------------------|------|--------|-----------|--------|
| Belgium              | Potatoes                 | 2018 | tonnes | 3046443   |        |
| Belgium              | Pumpkins,squashandgourds | 2018 | tonnes |           | 9200   |
| Belgium              | Wheat                    | 2018 | tonnes | 1662249   |        |
| Belize               | Maize                    | 2018 | tonnes | 77798     |        |
| Belize               | Peas,dry                 | 2018 | tonnes | 1545      |        |
| Belize               | Potatoes                 | 2018 | tonnes | 1540      |        |
| Belize               | Pumpkins,squashandgourds | 2018 | tonnes |           | 134    |
| Belize               | Rice,paddy               | 2018 | tonnes | 13375     |        |
| Belize               | Soybeans                 | 2018 | tonnes | 11776     |        |
| Benin                | Maize                    | 2018 | tonnes | 1509758   |        |
| Benin                | Potatoes                 | 2018 | tonnes | 60        |        |
| Benin                | Rice,paddy               | 2018 | tonnes | 459313    |        |
| Benin                | Soybeans                 | 2018 | tonnes | 221977    |        |
| Berautia             | Potatoes                 | 2018 | tonnes | 925       |        |
| Bhutan               | Apples                   | 2018 | tonnes | 8632      |        |
| Bhutan               | Barley                   | 2018 | tonnes | 1994      |        |
| Bhutan               | Maize                    | 2018 | tonnes | 92949     |        |
| Bhutan               | Peas,dry                 | 2018 | tonnes | 890       |        |
| Bhutan               | Potatoes                 | 2018 | tonnes | 56792     |        |
| Bhutan               | Pumpkins,squashandgourds | 2018 | tonnes |           | 5898   |
| Bhutan               | Rice,paddy               | 2018 | tonnes | 83753     |        |
| Bhutan               | Soybeans                 | 2018 | tonnes | 226       |        |
| Bhutan               | Wheat                    | 2018 | tonnes | 4141      |        |
| Bolivia              | Apples                   | 2018 | tonnes | 2905      |        |
| Bolivia              | Barley                   | 2018 | tonnes | 46620     |        |
| Bolivia              | Grapes                   | 2018 | tonnes | 23674     |        |
| Bolivia              | Maize                    | 2018 | tonnes | 1260926   |        |
| Bolivia              | Peas,dry                 | 2018 | tonnes | 4886      |        |
| Bolivia              | Potatoes                 | 2018 | tonnes | 1160940   |        |
| Bolivia              | Pumpkins,squashandgourds | 2018 | tonnes |           | 24629  |
| Bolivia              | Rice,paddy               | 2018 | tonnes | 541157    |        |
| Bolivia              | Soybeans                 | 2018 | tonnes | 2942131   |        |
| Bolivia              | Wheat                    | 2018 | tonnes | 301689    |        |
| BosniaandHerzegovina | Apples                   | 2018 | tonnes |           | 112513 |
| BosniaandHerzegovina | Barley                   | 2018 | tonnes | 79660     |        |
| BosniaandHerzegovina | Grapes                   | 2018 | tonnes | 40408     |        |
| BosniaandHerzegovina | Maize                    | 2018 | tonnes | 1272239   |        |
| BosniaandHerzegovina | Peas,dry                 | 2018 | tonnes | 1617      |        |
| BosniaandHerzegovina | Potatoes                 | 2018 | tonnes | 394274    |        |
| BosniaandHerzegovina | Soybeans                 | 2018 | tonnes | 23332     |        |
| BosniaandHerzegovina | Wheat                    | 2018 | tonnes |           | 296810 |
| Botswana             | Maize                    | 2018 | tonnes | 13126     |        |
| Botswana             | Wheat                    | 2018 | tonnes |           |        |
| Brazil               | Apples                   | 2018 | tonnes | 1186097   |        |
| Brazil               | Barley                   | 2018 | tonnes | 330374    |        |
| Brazil               | Grapes                   | 2018 | tonnes | 1591986   |        |
| Brazil               | Maize                    | 2018 | tonnes | 82268298  |        |
| Brazil               | Peas,dry                 | 2018 | tonnes | 2813      |        |
| Brazil               | Potatoes                 | 2018 | tonnes | 3688029   |        |
| Brazil               | Rice,paddy               | 2018 | tonnes | 11749192  |        |
| Brazil               | Soybeans                 | 2018 | tonnes | 117887672 |        |
| Brazil               | Wheat                    | 2018 | tonnes | 5418711   |        |
| BruneiDarussalam     | Pumpkins,squashandgourds | 2018 | tonnes |           | 639    |
| BruneiDarussalam     | Rice,paddy               | 2018 | tonnes |           | 1669   |
| Bulgaria             | Apples                   | 2018 | tonnes | 60298     |        |
| Bulgaria             | Barley                   | 2018 | tonnes | 437507    |        |

|                        |                          |      |        |          |        |  |
|------------------------|--------------------------|------|--------|----------|--------|--|
| Bulgaria               | Grapes                   | 2018 | tonnes | 195470   |        |  |
| Bulgaria               | Maize                    | 2018 | tonnes | 3478013  |        |  |
| Bulgaria               | Peas,dry                 | 2018 | tonnes | 53900    |        |  |
| Bulgaria               | Potatoes                 | 2018 | tonnes | 261594   |        |  |
| Bulgaria               | Pumpkins,squashandgourds | 2018 | tonnes |          | 26339  |  |
| Bulgaria               | Rice,paddy               | 2018 | tonnes | 63415    |        |  |
| Bulgaria               | Soybeans                 | 2018 | tonnes | 4548     |        |  |
| Bulgaria               | Wheat                    | 2018 | tonnes | 5832449  |        |  |
| BurkinaFaso            | Maize                    | 2018 | tonnes | 1700127  |        |  |
| BurkinaFaso            | Potatoes                 | 2018 | tonnes | 1418     |        |  |
| BurkinaFaso            | Rice,paddy               | 2018 | tonnes | 190949   |        |  |
| BurkinaFaso            | Soybeans                 | 2018 | tonnes | 31314    |        |  |
| Burundi                | Maize                    | 2018 | tonnes | 290498   |        |  |
| Burundi                | Peas,dry                 | 2018 | tonnes | 4919     |        |  |
| Burundi                | Potatoes                 | 2018 | tonnes | 302665   |        |  |
| Burundi                | Rice,paddy               | 2018 | tonnes | 55671    |        |  |
| Burundi                | Soybeans                 | 2018 | tonnes | 2387     |        |  |
| Burundi                | Wheat                    | 2018 | tonnes | 22751    |        |  |
| Caboverde              | Maize                    | 2018 | tonnes | 3893     |        |  |
| Caboverde              | Potatoes                 | 2018 | tonnes | 2200     |        |  |
| Caboverde              | Pumpkins,squashandgourds | 2018 | tonnes |          | 0      |  |
| Cambodia               | Maize                    | 2018 | tonnes | 604333   |        |  |
| Cambodia               | Rice,paddy               | 2018 | tonnes | 10647212 |        |  |
| Cambodia               | Soybeans                 | 2018 | tonnes | 170000   |        |  |
| Cameroun               | Maize                    | 2018 | tonnes | 2344665  |        |  |
| Cameroun               | Pistachios               | 2018 | tonnes |          |        |  |
| Cameroun               | Potatoes                 | 2018 | tonnes | 302706   |        |  |
| Cameroun               | Pumpkins,squashandgourds | 2018 | tonnes |          | 203748 |  |
| Cameroun               | Rice,paddy               | 2018 | tonnes | 332534   |        |  |
| Cameroun               | Soybeans                 | 2018 | tonnes | 20624    |        |  |
| Cameroun               | Wheat                    | 2018 | tonnes | 938      |        |  |
| Canada                 | Apples                   | 2018 | tonnes | 424709   |        |  |
| Canada                 | Barley                   | 2018 | tonnes | 8379700  |        |  |
| Canada                 | Grapes                   | 2018 | tonnes | 120293   |        |  |
| Canada                 | Maize                    | 2018 | tonnes | 13664830 |        |  |
| Canada                 | Peas,dry                 | 2018 | tonnes | 3500700  |        |  |
| Canada                 | Potatoes                 | 2018 | tonnes | 5790038  |        |  |
| Canada                 | Pumpkins,squashandgourds | 2018 | tonnes |          | 132061 |  |
| Canada                 | Safflowerseed            | 2018 | tonnes |          |        |  |
| Canada                 | Soybeans                 | 2018 | tonnes | 7266600  |        |  |
| Canada                 | Wheat                    | 2018 | tonnes | 31769930 |        |  |
| CaymanIslands          | Pumpkins,squashandgourds | 2018 | tonnes |          | 41     |  |
| CentralAfricanRepublic | Maize                    | 2018 | tonnes | 98876    |        |  |
| CentralAfricanRepublic | Potatoes                 | 2018 | tonnes | 1448     |        |  |
| CentralAfricanRepublic | Pumpkins,squashandgourds | 2018 | tonnes |          | 20433  |  |
| CentralAfricanRepublic | Rice,paddy               | 2018 | tonnes | 11108    |        |  |
| Chad                   | Maize                    | 2018 | tonnes | 437898   |        |  |
| Chad                   | Potatoes                 | 2018 | tonnes | 41583    |        |  |
| Chad                   | Rice,paddy               | 2018 | tonnes | 269540   |        |  |
| Chad                   | Wheat                    | 2018 | tonnes | 1798     |        |  |
| Chile                  | Apples                   | 2018 | tonnes | 1727277  |        |  |
| Chile                  | Barley                   | 2018 | tonnes | 170662   |        |  |
| Chile                  | Grapes                   | 2018 | tonnes | 2500000  |        |  |
| Chile                  | Maize                    | 2018 | tonnes | 1110608  |        |  |
| Chile                  | Peas,dry                 | 2018 | tonnes | 862      |        |  |
| Chile                  | Potatoes                 | 2018 | tonnes | 1183357  |        |  |

|                           |                             |      |        |           |  |
|---------------------------|-----------------------------|------|--------|-----------|--|
| Chile                     | Pumpkins, squash and gourds | 2018 | tonnes | 91937     |  |
| Chile                     | Rice, paddy                 | 2018 | tonnes | 192806    |  |
| Chile                     | Soybeans                    | 2018 | tonnes |           |  |
| Chile                     | Wheat                       | 2018 | tonnes | 1489003   |  |
| China                     | Apples                      | 2018 | tonnes | 39295019  |  |
| China                     | Barley                      | 2018 | tonnes | 1487906   |  |
| China                     | Grapes                      | 2018 | tonnes | 13494811  |  |
| China                     | Maize                       | 2018 | tonnes | 257348659 |  |
| China                     | Peas, dry                   | 2018 | tonnes | 1525476   |  |
| China                     | Pistachios                  | 2018 | tonnes | 74826     |  |
| China                     | Potatoes                    | 2018 | tonnes | 90321442  |  |
| China                     | Pumpkins, squash and gourds | 2018 | tonnes | 6188861   |  |
| China                     | Rice, paddy                 | 2018 | tonnes | 214076798 |  |
| China                     | Safflowerseed               | 2018 | tonnes | 32950     |  |
| China                     | Soybeans                    | 2018 | tonnes | 14193621  |  |
| China                     | Wheat                       | 2018 | tonnes | 131447224 |  |
| Hongkong                  | Pumpkins, squash and gourds | 2018 | tonnes | 249       |  |
| Hongkong                  | Rice, paddy                 | 2018 | tonnes | 0         |  |
| China, mainland           | Apples                      | 2018 | tonnes | 39295400  |  |
| China, mainland           | Barley                      | 2018 | tonnes | 1487906   |  |
| China, mainland           | Grapes                      | 2018 | tonnes | 13387012  |  |
| China, mainland           | Maize                       | 2018 | tonnes | 257173900 |  |
| China, mainland           | Peas, dry                   | 2018 | tonnes | 1525476   |  |
| China, mainland           | Pistachios                  | 2018 | tonnes | 74826     |  |
| China, mainland           | Potatoes                    | 2018 | tonnes | 90299155  |  |
| China, mainland           | Pumpkins, squash and gourds | 2018 | tonnes | 6133734   |  |
| China, mainland           | Rice, paddy                 | 2018 | tonnes | 212129000 |  |
| China, mainland           | Safflowerseed               | 2018 | tonnes | 32950     |  |
| China, mainland           | Soybeans                    | 2018 | tonnes | 14188217  |  |
| China, mainland           | Wheat                       | 2018 | tonnes | 131440600 |  |
| China, Taiwan Province of | Apples                      | 2018 | tonnes | 1619      |  |
| China, Taiwan Province of | Barley                      | 2018 | tonnes |           |  |
| China, Taiwan Province of | Grapes                      | 2018 | tonnes | 97799     |  |
| China, Taiwan Province of | Maize                       | 2018 | tonnes | 174759    |  |
| China, Taiwan Province of | Potatoes                    | 2018 | tonnes | 60267     |  |
| China, Taiwan Province of | Pumpkins, squash and gourds | 2018 | tonnes | 52668     |  |
| China, Taiwan Province of | Rice, paddy                 | 2018 | tonnes | 1949790   |  |
| China, Taiwan Province of | Soybeans                    | 2018 | tonnes | 4404      |  |
| China, Taiwan Province of | Wheat                       | 2018 | tonnes | 6724      |  |
| Colombia                  | Apples                      | 2018 | tonnes | 2368      |  |
| Colombia                  | Barley                      | 2018 | tonnes | 11001     |  |
| Colombia                  | Grapes                      | 2018 | tonnes | 24844     |  |
| Colombia                  | Maize                       | 2018 | tonnes | 1368246   |  |
| Colombia                  | Peas, dry                   | 2018 | tonnes | 69716     |  |
| Colombia                  | Potatoes                    | 2018 | tonnes | 3107660   |  |
| Colombia                  | Pumpkins, squash and gourds | 2018 | tonnes | 76639     |  |
| Colombia                  | Rice, paddy                 | 2018 | tonnes | 3322837   |  |
| Colombia                  | Soybeans                    | 2018 | tonnes | 77000     |  |
| Colombia                  | Wheat                       | 2018 | tonnes | 11139     |  |
| Comoros                   | Maize                       | 2018 | tonnes | 7014      |  |
| Comoros                   | Potatoes                    | 2018 | tonnes | 600       |  |
| Comoros                   | Rice, paddy                 | 2018 | tonnes | 31340     |  |
| Congo                     | Maize                       | 2018 | tonnes | 11928     |  |
| Congo                     | Peas, dry                   | 2018 | tonnes | 6879      |  |
| Congo                     | Potatoes                    | 2018 | tonnes | 6900      |  |
| Congo                     | Rice, paddy                 | 2018 | tonnes | 1196      |  |

|               |                          |      |        |         |        |
|---------------|--------------------------|------|--------|---------|--------|
| CostaRica     | Maize                    | 2018 | tonnes | 5358    |        |
| CostaRica     | Potatoes                 | 2018 | tonnes | 93567   |        |
| CostaRica     | Rice,paddy               | 2018 | tonnes | 158311  |        |
| CostaRica     | Soybeans                 | 2018 | tonnes |         |        |
| Cy77ee'Ivoine | Maize                    | 2018 | tonnes | 1006000 |        |
| Cy77ee'Ivoine | Pistachios               | 2018 | tonnes |         |        |
| Cy77ee'Ivoine | Potatoes                 | 2018 | tonnes |         |        |
| Cy77ee'Ivoine | Pumpkins,squashandgourds | 2018 | tonnes |         | 19372  |
| Cy77ee'Ivoine | Rice,paddy               | 2018 | tonnes | 2109333 |        |
| Cy77ee'Ivoine | Soybeans                 | 2018 | tonnes | 608     |        |
| Croatia       | Apples                   | 2018 | tonnes | 93467   |        |
| Croatia       | Barley                   | 2018 | tonnes | 227520  |        |
| Croatia       | Grapes                   | 2018 | tonnes | 145242  |        |
| Croatia       | Maize                    | 2018 | tonnes | 2147275 |        |
| Croatia       | Peas,dry                 | 2018 | tonnes | 314     |        |
| Croatia       | Potatoes                 | 2018 | tonnes | 182261  |        |
| Croatia       | Soybeans                 | 2018 | tonnes | 245186  |        |
| Croatia       | Wheat                    | 2018 | tonnes | 744405  |        |
| Cuba          | Grapes                   | 2018 | tonnes | 21952   |        |
| Cuba          | Maize                    | 2018 | tonnes | 345908  |        |
| Cuba          | Potatoes                 | 2018 | tonnes | 135147  |        |
| Cuba          | Pumpkins,squashandgourds | 2018 | tonnes |         | 452204 |
| Cuba          | Rice,paddy               | 2018 | tonnes | 460570  |        |
| Cyprus        | Apples                   | 2018 | tonnes | 3772    |        |
| Cyprus        | Barley                   | 2018 | tonnes | 15679   |        |
| Cyprus        | Grapes                   | 2018 | tonnes | 23454   |        |
| Cyprus        | Pistachios               | 2018 | tonnes | 10      |        |
| Cyprus        | Potatoes                 | 2018 | tonnes | 106452  |        |
| Cyprus        | Pumpkins,squashandgourds | 2018 | tonnes |         | 2601   |
| Cyprus        | Wheat                    | 2018 | tonnes | 18054   |        |
| Czechia       | Apples                   | 2018 | tonnes | 151528  |        |
| Czechia       | Barley                   | 2018 | tonnes | 1006034 |        |
| Czechia       | Grapes                   | 2018 | tonnes | 103704  |        |
| Czechia       | Maize                    | 2018 | tonnes | 489154  |        |
| Czechia       | Peas,dry                 | 2018 | tonnes | 70564   |        |
| Czechia       | Potatoes                 | 2018 | tonnes | 503560  |        |
| Czechia       | Soybeans                 | 2018 | tonnes | 25259   |        |
| Czechia       | Wheat                    | 2018 | tonnes | 4417041 |        |
| Nkorea        | Apples                   | 2018 | tonnes | 813064  |        |
| Nkorea        | Barley                   | 2018 | tonnes | 22000   |        |
| Nkorea        | Maize                    | 2018 | tonnes | 1876000 |        |
| Nkorea        | Potatoes                 | 2018 | tonnes | 2800000 |        |
| Nkorea        | Pumpkins,squashandgourds | 2018 | tonnes |         | 71086  |
| Nkorea        | Rice,paddy               | 2018 | tonnes | 2988000 |        |
| Nkorea        | Soybeans                 | 2018 | tonnes | 135000  |        |
| Nkorea        | Wheat                    | 2018 | tonnes | 85000   |        |
| Congo         | Barley                   | 2018 | tonnes | 1085    |        |
| Congo         | Maize                    | 2018 | tonnes | 2078352 |        |
| Congo         | Peas,dry                 | 2018 | tonnes | 1397    |        |
| Congo         | Potatoes                 | 2018 | tonnes | 101398  |        |
| Congo         | Pumpkins,squashandgourds | 2018 | tonnes |         | 30806  |
| Congo         | Rice,paddy               | 2018 | tonnes | 990139  |        |
| Congo         | Soybeans                 | 2018 | tonnes | 25772   |        |
| Congo         | Wheat                    | 2018 | tonnes | 6309    |        |
| Denmark       | Apples                   | 2018 | tonnes | 32645   |        |
| Denmark       | Barley                   | 2018 | tonnes | 3485656 |        |



|             |                             |      |        |         |        |  |
|-------------|-----------------------------|------|--------|---------|--------|--|
| Denmark     | Maize                       | 2018 | tonnes | 35823   |        |  |
| Denmark     | Peas, dry                   | 2018 | tonnes | 20434   |        |  |
| Denmark     | Potatoes                    | 2018 | tonnes | 1806768 |        |  |
| Denmark     | Pumpkins, squash and gourds | 2018 | tonnes |         | 0      |  |
| Denmark     | Wheat                       | 2018 | tonnes | 2654819 |        |  |
| Djibouti    | Maize                       | 2018 | tonnes | 18      |        |  |
| Djibouti    | Pumpkins, squash and gourds | 2018 | tonnes |         | 17     |  |
| Dominica    | Maize                       | 2018 | tonnes | 191     |        |  |
| Dominica    | Potatoes                    | 2018 | tonnes | 136     |        |  |
| Dominica    | Pumpkins, squash and gourds | 2018 | tonnes |         | 937    |  |
| Dominica    | Maize                       | 2018 | tonnes | 44590   |        |  |
| Dominica    | Peas, dry                   | 2018 | tonnes | 488     |        |  |
| Dominica    | Potatoes                    | 2018 | tonnes | 88557   |        |  |
| Dominica    | Pumpkins, squash and gourds | 2018 | tonnes |         | 40158  |  |
| Dominica    | Rice, paddy                 | 2018 | tonnes | 627362  |        |  |
| Ecuador     | Apples                      | 2018 | tonnes | 6970    |        |  |
| Ecuador     | Barley                      | 2018 | tonnes | 13674   |        |  |
| Ecuador     | Grapes                      | 2018 | tonnes | 519     |        |  |
| Ecuador     | Maize                       | 2018 | tonnes | 1324147 |        |  |
| Ecuador     | Peas, dry                   | 2018 | tonnes | 592     |        |  |
| Ecuador     | Potatoes                    | 2018 | tonnes | 269201  |        |  |
| Ecuador     | Pumpkins, squash and gourds | 2018 | tonnes |         | 4127   |  |
| Ecuador     | Rice, paddy                 | 2018 | tonnes | 1350093 |        |  |
| Ecuador     | Soybeans                    | 2018 | tonnes | 25504   |        |  |
| Ecuador     | Wheat                       | 2018 | tonnes | 5398    |        |  |
| Egypt       | Apples                      | 2018 | tonnes | 704727  |        |  |
| Egypt       | Barley                      | 2018 | tonnes | 113838  |        |  |
| Egypt       | Grapes                      | 2018 | tonnes | 1759472 |        |  |
| Egypt       | Maize                       | 2018 | tonnes | 7300000 |        |  |
| Egypt       | Peas, dry                   | 2018 | tonnes | 451     |        |  |
| Egypt       | Potatoes                    | 2018 | tonnes | 4826476 |        |  |
| Egypt       | Pumpkins, squash and gourds | 2018 | tonnes |         | 477283 |  |
| Egypt       | Rice, paddy                 | 2018 | tonnes | 4900000 |        |  |
| Egypt       | Soybeans                    | 2018 | tonnes | 49000   |        |  |
| Egypt       | Wheat                       | 2018 | tonnes | 8800000 |        |  |
| El Salvador | Apples                      | 2018 | tonnes | 34950   |        |  |
| El Salvador | Maize                       | 2018 | tonnes | 685509  |        |  |
| El Salvador | Potatoes                    | 2018 | tonnes | 10597   |        |  |
| El Salvador | Pumpkins, squash and gourds | 2018 | tonnes |         | 8498   |  |
| El Salvador | Rice, paddy                 | 2018 | tonnes | 22764   |        |  |
| El Salvador | Soybeans                    | 2018 | tonnes | 5694    |        |  |
| Eritrea     | Barley                      | 2018 | tonnes | 68268   |        |  |
| Eritrea     | Maize                       | 2018 | tonnes | 19914   |        |  |
| Eritrea     | Peas, dry                   | 2018 | tonnes | 734     |        |  |
| Eritrea     | Potatoes                    | 2018 | tonnes | 135     |        |  |
| Eritrea     | Wheat                       | 2018 | tonnes | 26939   |        |  |
| Estonia     | Apples                      | 2018 | tonnes | 3657    |        |  |
| Estonia     | Barley                      | 2018 | tonnes | 347497  |        |  |
| Estonia     | Grapes                      | 2018 | tonnes |         |        |  |
| Estonia     | Peas, dry                   | 2018 | tonnes | 53652   |        |  |
| Estonia     | Potatoes                    | 2018 | tonnes | 88434   |        |  |
| Estonia     | Wheat                       | 2018 | tonnes | 450265  |        |  |
| Eswatini    | Maize                       | 2018 | tonnes | 91247   |        |  |
| Eswatini    | Potatoes                    | 2018 | tonnes | 8520    |        |  |
| Eswatini    | Rice, paddy                 | 2018 | tonnes | 83      |        |  |
| Eswatini    | Wheat                       | 2018 | tonnes | 713     |        |  |

|                 |                          |      |        |          |        |  |
|-----------------|--------------------------|------|--------|----------|--------|--|
| Ethiopia        | Barley                   | 2018 | tonnes | 2101375  |        |  |
| Ethiopia        | Grapes                   | 2018 | tonnes | 3971     |        |  |
| Ethiopia        | Maize                    | 2018 | tonnes | 7960201  |        |  |
| Ethiopia        | Peas,dry                 | 2018 | tonnes | 374588   |        |  |
| Ethiopia        | Potatoes                 | 2018 | tonnes | 743153   |        |  |
| Ethiopia        | Rice,paddy               | 2018 | tonnes | 144200   |        |  |
| Ethiopia        | Safflowerseed            | 2018 | tonnes | 9184     |        |  |
| Ethiopia        | Soybeans                 | 2018 | tonnes | 98000    |        |  |
| Ethiopia        | Wheat                    | 2018 | tonnes | 4238838  |        |  |
| FaroeIslands    | Potatoes                 | 2018 | tonnes | 1472     |        |  |
| Fiji            | Maize                    | 2018 | tonnes | 1208     |        |  |
| Fiji            | Potatoes                 | 2018 | tonnes | 24       |        |  |
| Fiji            | Pumpkins,squashandgourds | 2018 | tonnes |          | 2132   |  |
| Fiji            | Rice,paddy               | 2018 | tonnes | 7051     |        |  |
| Finland         | Apples                   | 2018 | tonnes | 7196     |        |  |
| Finland         | Barley                   | 2018 | tonnes | 1338100  |        |  |
| Finland         | Peas,dry                 | 2018 | tonnes | 20100    |        |  |
| Finland         | Potatoes                 | 2018 | tonnes | 800300   |        |  |
| Finland         | Pumpkins,squashandgourds | 2018 | tonnes |          | 2043   |  |
| Finland         | Wheat                    | 2018 | tonnes | 494703   |        |  |
| France          | Apples                   | 2018 | tonnes | 1737412  |        |  |
| France          | Barley                   | 2018 | tonnes | 11193334 |        |  |
| France          | Grapes                   | 2018 | tonnes | 6198323  |        |  |
| France          | Maize                    | 2018 | tonnes | 12667393 |        |  |
| France          | Peas,dry                 | 2018 | tonnes | 615705   |        |  |
| France          | Potatoes                 | 2018 | tonnes | 7870973  |        |  |
| France          | Pumpkins,squashandgourds | 2018 | tonnes |          | 90342  |  |
| France          | Rice,paddy               | 2018 | tonnes | 73306    |        |  |
| France          | Soybeans                 | 2018 | tonnes | 400292   |        |  |
| France          | Wheat                    | 2018 | tonnes | 35798234 |        |  |
| FrenchGuyana    | Maize                    | 2018 | tonnes | 417      |        |  |
| FrenchGuyana    | Pumpkins,squashandgourds | 2018 | tonnes |          | 760    |  |
| FrenchGuyana    | Rice,paddy               | 2018 | tonnes | 2053     |        |  |
| FrenchGuyana    | Soybeans                 | 2018 | tonnes |          |        |  |
| FrenchPolynesia | Potatoes                 | 2018 | tonnes | 579      |        |  |
| FrenchPolynesia | Pumpkins,squashandgourds | 2018 | tonnes |          | 108    |  |
| Gabon           | Maize                    | 2018 | tonnes | 46006    |        |  |
| Gabon           | Rice,paddy               | 2018 | tonnes | 1830     |        |  |
| Gabon           | Soybeans                 | 2018 | tonnes | 4057     |        |  |
| Gambia          | Maize                    | 2018 | tonnes | 39383    |        |  |
| Gambia          | Rice,paddy               | 2018 | tonnes | 63808    |        |  |
| Georgia         | Apples                   | 2018 | tonnes | 82700    |        |  |
| Georgia         | Barley                   | 2018 | tonnes | 57700    |        |  |
| Georgia         | Grapes                   | 2018 | tonnes | 269920   |        |  |
| Georgia         | Maize                    | 2018 | tonnes | 194200   |        |  |
| Georgia         | Peas,dry                 | 2018 | tonnes | 112      |        |  |
| Georgia         | Potatoes                 | 2018 | tonnes | 237500   |        |  |
| Georgia         | Soybeans                 | 2018 | tonnes | 2020     |        |  |
| Georgia         | Wheat                    | 2018 | tonnes | 107100   |        |  |
| Germany         | Apples                   | 2018 | tonnes | 1198517  |        |  |
| Germany         | Barley                   | 2018 | tonnes | 9683600  |        |  |
| Germany         | Grapes                   | 2018 | tonnes | 1408597  |        |  |
| Germany         | Maize                    | 2018 | tonnes | 3344030  |        |  |
| Germany         | Peas,dry                 | 2018 | tonnes | 197100   |        |  |
| Germany         | Potatoes                 | 2018 | tonnes | 8920800  |        |  |
| Germany         | Pumpkins,squashandgourds | 2018 | tonnes |          | 122241 |  |

|               |                          |      |        |          |        |
|---------------|--------------------------|------|--------|----------|--------|
| Germany       | Soybeans                 | 2018 | tonnes | 59000    |        |
| Germany       | Wheat                    | 2018 | tonnes | 20269500 |        |
| Ghana         | Maize                    | 2018 | tonnes | 2306384  |        |
| Ghana         | Rice,paddy               | 2018 | tonnes | 769401   |        |
| Ghana         | Soybeans                 | 2018 | tonnes | 152023   |        |
| Greece        | Apples                   | 2018 | tonnes | 285000   |        |
| Greece        | Barley                   | 2018 | tonnes | 344610   |        |
| Greece        | Grapes                   | 2018 | tonnes | 933150   |        |
| Greece        | Maize                    | 2018 | tonnes | 1205980  |        |
| Greece        | Peas,dry                 | 2018 | tonnes | 504      |        |
| Greece        | Pistachios               | 2018 | tonnes | 8568     |        |
| Greece        | Potatoes                 | 2018 | tonnes | 485770   |        |
| Greece        | Pumpkins,squashandgourds | 2018 | tonnes |          | 879    |
| Greece        | Rice,paddy               | 2018 | tonnes | 222890   |        |
| Greece        | Soybeans                 | 2018 | tonnes | 9490     |        |
| Greece        | wheat                    | 2018 | tonnes | 1072940  |        |
| Grenada       | Apples                   | 2018 | tonnes | 457      |        |
| Grenada       | Maize                    | 2018 | tonnes | 385      |        |
| Grenada       | Pumpkins,squashandgourds | 2018 | tonnes |          | 395    |
| Guadeloupe    | Potatoes                 | 2018 | tonnes |          |        |
| Guadeloupe    | Pumpkins,squashandgourds | 2018 | tonnes |          | 343    |
| Guam          | Maize                    | 2018 | tonnes | 56       |        |
| Guam          | Pumpkins,squashandgourds | 2018 | tonnes |          |        |
| Guatemala     | Apples                   | 2018 | tonnes | 24800    |        |
| Guatemala     | Barley                   | 2018 | tonnes | 17       |        |
| Guatemala     | Grapes                   | 2018 | tonnes | 20099    |        |
| Guatemala     | Maize                    | 2018 | tonnes | 1921936  |        |
| Guatemala     | Potatoes                 | 2018 | tonnes | 564314   |        |
| Guatemala     | Rice,paddy               | 2018 | tonnes | 31498    |        |
| Guatemala     | Soybeans                 | 2018 | tonnes | 36000    |        |
| Guatemala     | Wheat                    | 2018 | tonnes | 1282     |        |
| Guinea        | Maize                    | 2018 | tonnes | 818544   |        |
| Guinea        | Potatoes                 | 2018 | tonnes | 151326   |        |
| Guinea        | Rice,paddy               | 2018 | tonnes | 2329747  |        |
| Guinea-Bissau | Maize                    | 2018 | tonnes | 7254     |        |
| Guinea-Bissau | Rice,paddy               | 2018 | tonnes |          | 171239 |
| Guyana        | Maize                    | 2018 | tonnes | 4264     |        |
| Guyana        | Peas,dry                 | 2018 | tonnes | 445      |        |
| Guyana        | Pumpkins,squashandgourds | 2018 | tonnes |          | 59429  |
| Guyana        | Rice,paddy               | 2018 | tonnes | 984472   |        |
| Guyana        | Soybeans                 | 2018 | tonnes |          |        |
| Haiti         | Maize                    | 2018 | tonnes | 260000   |        |
| Haiti         | Potatoes                 | 2018 | tonnes | 34475    |        |
| Haiti         | Pumpkins,squashandgourds | 2018 | tonnes |          | 695    |
| Haiti         | Rice,paddy               | 2018 | tonnes | 183000   |        |
| Honduras      | Apples                   | 2018 | tonnes | 180      |        |
| Honduras      | Grapes                   | 2018 | tonnes | 180      |        |
| Honduras      | Maize                    | 2018 | tonnes | 704747   |        |
| Honduras      | Potatoes                 | 2018 | tonnes | 26904    |        |
| Honduras      | Pumpkins,squashandgourds | 2018 | tonnes |          | 4675   |
| Honduras      | Rice,paddy               | 2018 | tonnes | 59698    |        |
| Honduras      | Soybeans                 | 2018 | tonnes | 982      |        |
| Honduras      | Wheat                    | 2018 | tonnes | 1248     |        |
| Hungary       | Apples                   | 2018 | tonnes | 674626   |        |
| Hungary       | Barley                   | 2018 | tonnes | 1141007  |        |
| Hungary       | Grapes                   | 2018 | tonnes | 539640   |        |

|                            |                             |      |        |           |         |  |
|----------------------------|-----------------------------|------|--------|-----------|---------|--|
| Hungary                    | Maize                       | 2018 | tonnes | 7963217   |         |  |
| Hungary                    | Peas, dry                   | 2018 | tonnes | 33322     |         |  |
| Hungary                    | Potatoes                    | 2018 | tonnes | 330645    |         |  |
| Hungary                    | Pumpkins, squash and gourds | 2018 | tonnes |           | 16677   |  |
| Hungary                    | Rice, paddy                 | 2018 | tonnes | 11971     |         |  |
| Hungary                    | Safflowerseed               | 2018 | tonnes | 7         |         |  |
| Hungary                    | Soybeans                    | 2018 | tonnes | 178200    |         |  |
| Hungary                    | Wheat                       | 2018 | tonnes | 5245830   |         |  |
| Iceland                    | Barley                      | 2018 | tonnes | 3900      |         |  |
| Iceland                    | Potatoes                    | 2018 | tonnes | 6020      |         |  |
| India                      | Apples                      | 2018 | tonnes | 2327000   |         |  |
| India                      | Barley                      | 2018 | tonnes | 1780000   |         |  |
| India                      | Grapes                      | 2018 | tonnes | 2920000   |         |  |
| India                      | Maize                       | 2018 | tonnes | 27820000  |         |  |
| India                      | Peas, dry                   | 2018 | tonnes | 820473    |         |  |
| India                      | Potatoes                    | 2018 | tonnes | 48528000  |         |  |
| India                      | Pumpkins, squash and gourds | 2018 | tonnes |           | 5589609 |  |
| India                      | Rice, paddy                 | 2018 | tonnes | 172580000 |         |  |
| India                      | Safflowerseed               | 2018 | tonnes | 55000     |         |  |
| India                      | Soybeans                    | 2018 | tonnes | 13788000  |         |  |
| India                      | Wheat                       | 2018 | tonnes | 99700000  |         |  |
| Indonesia                  | Maize                       | 2018 | tonnes | 30053938  |         |  |
| Indonesia                  | Potatoes                    | 2018 | tonnes | 1284762   |         |  |
| Indonesia                  | Pumpkins, squash and gourds | 2018 | tonnes |           | 454031  |  |
| Indonesia                  | Rice, paddy                 | 2018 | tonnes | 83037000  |         |  |
| Indonesia                  | Soybeans                    | 2018 | tonnes | 953571    |         |  |
| Iran (Islamic Republic of) | Apples                      | 2018 | tonnes | 2519249   |         |  |
| Iran (Islamic Republic of) | Barley                      | 2018 | tonnes | 2800000   |         |  |
| Iran (Islamic Republic of) | Grapes                      | 2018 | tonnes | 2032031   |         |  |
| Iran (Islamic Republic of) | Maize                       | 2018 | tonnes | 1338258   |         |  |
| Iran (Islamic Republic of) | Peas, dry                   | 2018 | tonnes |           |         |  |
| Iran (Islamic Republic of) | Pistachios                  | 2018 | tonnes | 551337    |         |  |
| Iran (Islamic Republic of) | Potatoes                    | 2018 | tonnes | 5321198   |         |  |
| Iran (Islamic Republic of) | Pumpkins, squash and gourds | 2018 | tonnes |           | 154090  |  |
| Iran (Islamic Republic of) | Rice, paddy                 | 2018 | tonnes | 1990300   |         |  |
| Iran (Islamic Republic of) | Safflowerseed               | 2018 | tonnes | 6154      |         |  |
| Iran (Islamic Republic of) | Soybeans                    | 2018 | tonnes | 210000    |         |  |
| Iran (Islamic Republic of) | Wheat                       | 2018 | tonnes | 14503000  |         |  |
| Iraq                       | Apples                      | 2018 | tonnes | 49813     |         |  |
| Iraq                       | Barley                      | 2018 | tonnes | 571293    |         |  |
| Iraq                       | Grapes                      | 2018 | tonnes | 96725     |         |  |
| Iraq                       | Maize                       | 2018 | tonnes | 209058    |         |  |
| Iraq                       | Potatoes                    | 2018 | tonnes | 294778    |         |  |
| Iraq                       | Pumpkins, squash and gourds | 2018 | tonnes |           | 22469   |  |
| Iraq                       | Rice, paddy                 | 2018 | tonnes | 274788    |         |  |
| Iraq                       | Soybeans                    | 2018 | tonnes | 29        |         |  |
| Iraq                       | Wheat                       | 2018 | tonnes | 8211382   |         |  |
| Ireland                    | Apples                      | 2018 | tonnes | 20100     |         |  |
| Ireland                    | Barley                      | 2018 | tonnes | 1224900   |         |  |
| Ireland                    | Peas, dry                   | 2018 | tonnes | 1750      |         |  |
| Ireland                    | Potatoes                    | 2018 | tonnes | 273000    |         |  |
| Ireland                    | Wheat                       | 2018 | tonnes | 506800    |         |  |
| Israel                     | Apples                      | 2018 | tonnes | 111000    |         |  |
| Israel                     | Barley                      | 2018 | tonnes | 8760      |         |  |
| Israel                     | Grapes                      | 2018 | tonnes | 63000     |         |  |
| Israel                     | Maize                       | 2018 | tonnes | 81930     |         |  |

|            |                             |      |        |          |        |
|------------|-----------------------------|------|--------|----------|--------|
| Israel     | Peas, dry                   | 2018 | tonnes | 444      |        |
| Israel     | Potatoes                    | 2018 | tonnes | 511163   |        |
| Israel     | Pumpkins, squash and gourds | 2018 | tonnes |          | 8873   |
| Israel     | Safflowerseed               | 2018 | tonnes | 3        |        |
| Israel     | Wheat                       | 2018 | tonnes | 70500    |        |
| Italy      | Apples                      | 2018 | tonnes | 2414921  |        |
| Italy      | Barley                      | 2018 | tonnes | 1010328  |        |
| Italy      | Grapes                      | 2018 | tonnes | 6513643  |        |
| Italy      | Maize                       | 2018 | tonnes | 6179035  |        |
| Italy      | Peas, dry                   | 2018 | tonnes | 50195    |        |
| Italy      | Pistachios                  | 2018 | tonnes | 3884     |        |
| Italy      | Potatoes                    | 2018 | tonnes | 1307598  |        |
| Italy      | Pumpkins, squash and gourds | 2018 | tonnes |          | 596397 |
| Italy      | Rice, paddy                 | 2018 | tonnes | 1512241  |        |
| Italy      | Soybeans                    | 2018 | tonnes | 1138893  |        |
| Italy      | Wheat                       | 2018 | tonnes | 6932943  |        |
| Jamaica    | Maize                       | 2018 | tonnes | 2177     |        |
| Jamaica    | Peas, dry                   | 2018 | tonnes | 857      |        |
| Jamaica    | Potatoes                    | 2018 | tonnes | 16184    |        |
| Jamaica    | Pumpkins, squash and gourds | 2018 | tonnes |          | 53967  |
| Jamaica    | Rice, paddy                 | 2018 | tonnes | 0        |        |
| Japan      | Apples                      | 2018 | tonnes | 756100   |        |
| Japan      | Barley                      | 2018 | tonnes | 174700   |        |
| Japan      | Grapes                      | 2018 | tonnes | 174700   |        |
| Japan      | Maize                       | 2018 | tonnes | 165      |        |
| Japan      | Peas, dry                   | 2018 | tonnes | 1177     |        |
| Japan      | Potatoes                    | 2018 | tonnes | 2261345  |        |
| Japan      | Pumpkins, squash and gourds | 2018 | tonnes |          | 197163 |
| Japan      | Rice, paddy                 | 2018 | tonnes | 9727500  |        |
| Japan      | Safflowerseed               | 2018 | tonnes |          |        |
| Japan      | Soybeans                    | 2018 | tonnes | 211300   |        |
| Japan      | Wheat                       | 2018 | tonnes | 764900   |        |
| Jordan     | Apples                      | 2018 | tonnes | 42394    |        |
| Jordan     | Barley                      | 2018 | tonnes | 35173    |        |
| Jordan     | Grapes                      | 2018 | tonnes | 44717    |        |
| Jordan     | Maize                       | 2018 | tonnes | 21914    |        |
| Jordan     | Pistachios                  | 2018 | tonnes | 620      |        |
| Jordan     | Potatoes                    | 2018 | tonnes | 177431   |        |
| Jordan     | Pumpkins, squash and gourds | 2018 | tonnes |          | 75034  |
| Jordan     | Soybeans                    | 2018 | tonnes | 0        |        |
| Jordan     | Wheat                       | 2018 | tonnes | 20666    |        |
| Kazakhstan | Apples                      | 2018 | tonnes | 222463   |        |
| Kazakhstan | Barley                      | 2018 | tonnes | 3971266  |        |
| Kazakhstan | Grapes                      | 2018 | tonnes | 88547    |        |
| Kazakhstan | Maize                       | 2018 | tonnes | 862094   |        |
| Kazakhstan | Peas, dry                   | 2018 | tonnes | 136541   |        |
| Kazakhstan | Potatoes                    | 2018 | tonnes | 3806992  |        |
| Kazakhstan | Rice, paddy                 | 2018 | tonnes | 482945   |        |
| Kazakhstan | Safflowerseed               | 2018 | tonnes | 214149   |        |
| Kazakhstan | Soybeans                    | 2018 | tonnes | 256437   |        |
| Kazakhstan | Wheat                       | 2018 | tonnes | 13944108 |        |
| Kenya      | Apples                      | 2018 | tonnes | 426      |        |
| Kenya      | Barley                      | 2018 | tonnes | 79069    |        |
| Kenya      | Maize                       | 2018 | tonnes | 4013777  |        |
| Kenya      | Potatoes                    | 2018 | tonnes | 1870376  |        |
| Kenya      | Rice, paddy                 | 2018 | tonnes | 110325   |        |

|                               |                          |      |        |         |         |  |
|-------------------------------|--------------------------|------|--------|---------|---------|--|
| Kenya                         | Soybeans                 | 2018 | tonnes | 2904    |         |  |
| Kenya                         | Wheat                    | 2018 | tonnes | 386600  |         |  |
| Kuwait                        | Barley                   | 2018 | tonnes | 2388    |         |  |
| Kuwait                        | Grapes                   | 2018 | tonnes | 214     |         |  |
| Kuwait                        | Maize                    | 2018 | tonnes | 8960    |         |  |
| Kuwait                        | Potatoes                 | 2018 | tonnes | 36212   |         |  |
| Kuwait                        | Pumpkins,squashandgourds | 2018 | tonnes |         | 18401   |  |
| Kuwait                        | Wheat                    | 2018 | tonnes | 9       |         |  |
| Kyrgyzstan                    | Apples                   | 2018 | tonnes | 144880  |         |  |
| Kyrgyzstan                    | Barley                   | 2018 | tonnes | 429308  |         |  |
| Kyrgyzstan                    | Grapes                   | 2018 | tonnes | 8774    |         |  |
| Kyrgyzstan                    | Maize                    | 2018 | tonnes | 692877  |         |  |
| Kyrgyzstan                    | Peas,dry                 | 2018 | tonnes | 491     |         |  |
| Kyrgyzstan                    | Pistachios               | 2018 | tonnes | 1038    |         |  |
| Kyrgyzstan                    | Potatoes                 | 2018 | tonnes | 1446810 |         |  |
| Kyrgyzstan                    | Pumpkins,squashandgourds | 2018 | tonnes |         | 3713    |  |
| Kyrgyzstan                    | Rice,paddy               | 2018 | tonnes | 40783   |         |  |
| Kyrgyzstan                    | Safflowerseed            | 2018 | tonnes | 12291   |         |  |
| Kyrgyzstan                    | Soybeans                 | 2018 | tonnes | 2872    |         |  |
| Kyrgyzstan                    | Wheat                    | 2018 | tonnes | 615826  |         |  |
| LaoPeople'sDemocraticRepublic | Maize                    | 2018 | tonnes |         | 981680  |  |
| LaoPeople'sDemocraticRepublic | Potatoes                 | 2018 | tonnes | 2160    |         |  |
| LaoPeople'sDemocraticRepublic | Rice,paddy               | 2018 | tonnes |         | 3584700 |  |
| LaoPeople'sDemocraticRepublic | Soybeans                 | 2018 | tonnes |         | 8380    |  |
| Latvia                        | Apples                   | 2018 | tonnes | 13913   |         |  |
| Latvia                        | Barley                   | 2018 | tonnes | 306300  |         |  |
| Latvia                        | Peas,dry                 | 2018 | tonnes | 22500   |         |  |
| Latvia                        | Potatoes                 | 2018 | tonnes | 426900  |         |  |
| Latvia                        | Pumpkins,squashandgourds | 2018 | tonnes |         | 6399    |  |
| Latvia                        | Soybeans                 | 2018 | tonnes |         |         |  |
| Latvia                        | Wheat                    | 2018 | tonnes | 1431600 |         |  |
| Lebanon                       | Apples                   | 2018 | tonnes | 124454  |         |  |
| Lebanon                       | Barley                   | 2018 | tonnes | 31446   |         |  |
| Lebanon                       | Grapes                   | 2018 | tonnes | 67184   |         |  |
| Lebanon                       | Maize                    | 2018 | tonnes | 3288    |         |  |
| Lebanon                       | Peas,dry                 | 2018 | tonnes | 3714    |         |  |
| Lebanon                       | Potatoes                 | 2018 | tonnes | 387791  |         |  |
| Lebanon                       | Pumpkins,squashandgourds | 2018 | tonnes |         | 27486   |  |
| Lebanon                       | Wheat                    | 2018 | tonnes | 135411  |         |  |
| Lesotho                       | Barley                   | 2018 | tonnes | 453     |         |  |
| Lesotho                       | Maize                    | 2018 | tonnes | 100242  |         |  |
| Lesotho                       | Peas,dry                 | 2018 | tonnes | 488     |         |  |
| Lesotho                       | Potatoes                 | 2018 | tonnes | 130602  |         |  |
| Lesotho                       | Wheat                    | 2018 | tonnes | 9066    |         |  |
| Liberia                       | Rice,paddy               | 2018 | tonnes |         | 257985  |  |
| Liberia                       | Soybeans                 | 2018 | tonnes | 3290    |         |  |
| Libya                         | Apples                   | 2018 | tonnes | 19111   |         |  |
| Libya                         | Barley                   | 2018 | tonnes | 63208   |         |  |
| Libya                         | Grapes                   | 2018 | tonnes | 32077   |         |  |
| Libya                         | Maize                    | 2018 | tonnes | 3571    |         |  |
| Libya                         | Peas,dry                 | 2018 | tonnes | 6065    |         |  |
| Libya                         | Potatoes                 | 2018 | tonnes | 348361  |         |  |
| Libya                         | Pumpkins,squashandgourds | 2018 | tonnes |         | 35290   |  |
| Libya                         | Wheat                    | 2018 | tonnes | 138770  |         |  |
| Liechtenstein                 | Grapes                   | 2018 | tonnes | 196     |         |  |
| Lithuania                     | Apples                   | 2018 | tonnes | 92034   |         |  |

|            |                          |      |        |         |        |
|------------|--------------------------|------|--------|---------|--------|
| Lithuania  | Barley                   | 2018 | tonnes | 619538  |        |
| Lithuania  | Grapes                   | 2018 | tonnes |         |        |
| Lithuania  | Maize                    | 2018 | tonnes | 87587   |        |
| Lithuania  | Peas,dry                 | 2018 | tonnes | 213692  |        |
| Lithuania  | Potatoes                 | 2018 | tonnes | 296229  |        |
| Lithuania  | Pumpkins,squashandgourds | 2018 | tonnes |         | 1526   |
| Lithuania  | Wheat                    | 2018 | tonnes | 2839899 |        |
| Luxembourg | Apples                   | 2018 | tonnes | 2977    |        |
| Luxembourg | Barley                   | 2018 | tonnes | 34662   |        |
| Luxembourg | Grapes                   | 2018 | tonnes | 18078   |        |
| Luxembourg | Maize                    | 2018 | tonnes | 565     |        |
| Luxembourg | Peas,dry                 | 2018 | tonnes | 921     |        |
| Luxembourg | Potatoes                 | 2018 | tonnes | 16211   |        |
| Luxembourg | Wheat                    | 2018 | tonnes | 79409   |        |
| Madagascar | Apples                   | 2018 | tonnes | 7111    |        |
| Madagascar | Grapes                   | 2018 | tonnes | 13512   |        |
| Madagascar | Maize                    | 2018 | tonnes | 215000  |        |
| Madagascar | Peas,dry                 | 2018 | tonnes | 21458   |        |
| Madagascar | Pistachios               | 2018 | tonnes | 3167    |        |
| Madagascar | Potatoes                 | 2018 | tonnes | 257379  |        |
| Madagascar | Rice,paddy               | 2018 | tonnes | 4030000 |        |
| Madagascar | Soybeans                 | 2018 | tonnes | 44      |        |
| Madagascar | Wheat                    | 2018 | tonnes | 6322    |        |
| Malawi     | Apples                   | 2018 | tonnes | 2639    |        |
| Malawi     | Grapes                   | 2018 | tonnes | 240     |        |
| Malawi     | Maize                    | 2018 | tonnes | 2697959 |        |
| Malawi     | Peas,dry                 | 2018 | tonnes | 3193    |        |
| Malawi     | Potatoes                 | 2018 | tonnes | 1125874 |        |
| Malawi     | Pumpkins,squashandgourds | 2018 | tonnes |         | 480233 |
| Malawi     | Rice,paddy               | 2018 | tonnes | 112313  |        |
| Malawi     | Soybeans                 | 2018 | tonnes | 175475  |        |
| Malawi     | Wheat                    | 2018 | tonnes | 729     |        |
| Malaysia   | Maize                    | 2018 | tonnes | 76362   |        |
| Malaysia   | Pumpkins,squashandgourds | 2018 | tonnes |         | 29560  |
| Malaysia   | Rice,paddy               | 2018 | tonnes | 2718987 |        |
| Malaysia   | Soybeans                 | 2018 | tonnes |         |        |
| Maldives   | Maize                    | 2018 | tonnes | 147     |        |
| Mali       | Maize                    | 2018 | tonnes | 3624950 |        |
| Mali       | Potatoes                 | 2018 | tonnes | 310992  |        |
| Mali       | Pumpkins,squashandgourds | 2018 | tonnes |         | 67969  |
| Mali       | Rice,paddy               | 2018 | tonnes | 3167528 |        |
| Mali       | Soybeans                 | 2018 | tonnes | 6683    |        |
| Mali       | Wheat                    | 2018 | tonnes | 29185   |        |
| Malta      | Apples                   | 2018 | tonnes | 20      |        |
| Malta      | Barley                   | 2018 | tonnes | 2166    |        |
| Malta      | Grapes                   | 2018 | tonnes | 8622    |        |
| Malta      | Potatoes                 | 2018 | tonnes | 7977    |        |
| Malta      | Pumpkins,squashandgourds | 2018 | tonnes |         | 1369   |
| Malta      | Wheat                    | 2018 | tonnes | 12206   |        |
| Martinique | Potatoes                 | 2018 | tonnes |         |        |
| Martinique | Pumpkins,squashandgourds | 2018 | tonnes |         |        |
| Mauritania | Barley                   | 2018 | tonnes | 1636    |        |
| Mauritania | Maize                    | 2018 | tonnes | 15519   |        |
| Mauritania | Peas,dry                 | 2018 | tonnes | 7670    |        |
| Mauritania | Potatoes                 | 2018 | tonnes | 2260    |        |
| Mauritania | Rice,paddy               | 2018 | tonnes | 232196  |        |

|                               |                          |      |        |          |        |     |
|-------------------------------|--------------------------|------|--------|----------|--------|-----|
| Mauritania                    | Wheat                    | 2018 | tonnes | 7349     |        |     |
| Mauritius                     | Maize                    | 2018 | tonnes | 387      |        |     |
| Mauritius                     | Pistachios               | 2018 | tonnes | 4        |        |     |
| Mauritius                     | Potatoes                 | 2018 | tonnes | 17093    |        |     |
| Mauritius                     | Pumpkins,squashandgourds | 2018 | tonnes |          | 17414  |     |
| Mauritius                     | Rice,paddy               | 2018 | tonnes | 10       |        |     |
| Mexico                        | Apples                   | 2018 | tonnes | 659692   |        |     |
| Mexico                        | Barley                   | 2018 | tonnes | 1008642  |        |     |
| Mexico                        | Grapes                   | 2018 | tonnes | 430858   |        |     |
| Mexico                        | Maize                    | 2018 | tonnes | 27189977 |        |     |
| Mexico                        | Peas,dry                 | 2018 | tonnes | 1876     |        |     |
| Mexico                        | Pistachios               | 2018 | tonnes | 61       |        |     |
| Mexico                        | Potatoes                 | 2018 | tonnes | 1802592  |        |     |
| Mexico                        | Pumpkins,squashandgourds | 2018 | tonnes |          | 770073 |     |
| Mexico                        | Rice,paddy               | 2018 | tonnes | 283763   |        |     |
| Mexico                        | Safflowerseed            | 2018 | tonnes | 58875    |        |     |
| Mexico                        | Soybeans                 | 2018 | tonnes | 324011   |        |     |
| Mexico                        | Wheat                    | 2018 | tonnes | 2943445  |        |     |
| Micronesia(FederatedStatesof) | Maize                    | 2018 | tonnes |          | 95     |     |
| Micronesia(FederatedStatesof) | Rice,paddy               | 2018 | tonnes |          |        | 177 |
| Mongolia                      | Barley                   | 2018 | tonnes | 2355     |        |     |
| Mongolia                      | Potatoes                 | 2018 | tonnes | 168863   |        |     |
| Mongolia                      | Wheat                    | 2018 | tonnes | 436115   |        |     |
| Montenegro                    | Apples                   | 2018 | tonnes | 1688     |        |     |
| Montenegro                    | Barley                   | 2018 | tonnes | 1082     |        |     |
| Montenegro                    | Grapes                   | 2018 | tonnes | 24441    |        |     |
| Montenegro                    | Maize                    | 2018 | tonnes | 2743     |        |     |
| Montenegro                    | Peas,dry                 | 2018 | tonnes | 1389     |        |     |
| Montenegro                    | Potatoes                 | 2018 | tonnes | 25038    |        |     |
| Montenegro                    | Wheat                    | 2018 | tonnes | 2467     |        |     |
| Montserrat                    | Maize                    | 2018 | tonnes | 138      |        |     |
| Montserrat                    | Potatoes                 | 2018 | tonnes | 219      |        |     |
| Morocco                       | Apples                   | 2018 | tonnes | 696950   |        |     |
| Morocco                       | Barley                   | 2018 | tonnes | 2051022  |        |     |
| Morocco                       | Grapes                   | 2018 | tonnes | 451158   |        |     |
| Morocco                       | Maize                    | 2018 | tonnes | 118392   |        |     |
| Morocco                       | Peas,dry                 | 2018 | tonnes | 35470    |        |     |
| Morocco                       | Pistachios               | 2018 | tonnes | 47       |        |     |
| Morocco                       | Potatoes                 | 2018 | tonnes | 1089149  |        |     |
| Morocco                       | Pumpkins,squashandgourds | 2018 | tonnes |          | 180463 |     |
| Morocco                       | Rice,paddy               | 2018 | tonnes | 60397    |        |     |
| Morocco                       | Safflowerseed            | 2018 | tonnes |          |        |     |
| Morocco                       | Soybeans                 | 2018 | tonnes | 732      |        |     |
| Morocco                       | Wheat                    | 2018 | tonnes | 7320620  |        |     |
| Mozambique                    | Maize                    | 2018 | tonnes | 165443   |        |     |
| Mozambique                    | Potatoes                 | 2018 | tonnes | 273325   |        |     |
| Mozambique                    | Pumpkins,squashandgourds | 2018 | tonnes |          | 1093   |     |
| Mozambique                    | Rice,paddy               | 2018 | tonnes | 134105   |        |     |
| Mozambique                    | Wheat                    | 2018 | tonnes | 21105    |        |     |
| Myanmar                       | Barley                   | 2018 | tonnes |          |        |     |
| Myanmar                       | Maize                    | 2018 | tonnes | 1983122  |        |     |
| Myanmar                       | Peas,dry                 | 2018 | tonnes | 80382    |        |     |
| Myanmar                       | Potatoes                 | 2018 | tonnes | 612443   |        |     |
| Myanmar                       | Rice,paddy               | 2018 | tonnes | 26418142 |        |     |
| Myanmar                       | Soybeans                 | 2018 | tonnes | 170986   |        |     |
| Myanmar                       | Wheat                    | 2018 | tonnes | 134372   |        |     |



|                |                          |      |        |          |        |  |
|----------------|--------------------------|------|--------|----------|--------|--|
| Namibia        | Grapes                   | 2018 | tonnes | 26645    |        |  |
| Namibia        | Maize                    | 2018 | tonnes | 69253    |        |  |
| Namibia        | Potatoes                 | 2018 | tonnes | 14520    |        |  |
| Namibia        | Wheat                    | 2018 | tonnes | 6094     |        |  |
| Nepal          | Apples                   | 2018 | tonnes | 28895    |        |  |
| Nepal          | Barley                   | 2018 | tonnes | 30510    |        |  |
| Nepal          | Maize                    | 2018 | tonnes | 2473283  |        |  |
| Nepal          | Potatoes                 | 2018 | tonnes | 3088000  |        |  |
| Nepal          | Rice,paddy               | 2018 | tonnes | 5151925  |        |  |
| Nepal          | Soybeans                 | 2018 | tonnes | 27681    |        |  |
| Nepal          | Wheat                    | 2018 | tonnes | 1549001  |        |  |
| Netherlands    | Apples                   | 2018 | tonnes | 269000   |        |  |
| Netherlands    | Barley                   | 2018 | tonnes | 253423   |        |  |
| Netherlands    | Grapes                   | 2018 | tonnes | 420      |        |  |
| Netherlands    | Maize                    | 2018 | tonnes | 84894    |        |  |
| Netherlands    | Peas,dry                 | 2018 | tonnes | 2583     |        |  |
| Netherlands    | Potatoes                 | 2018 | tonnes | 6029734  |        |  |
| Netherlands    | Pumpkins,squashandgourds | 2018 | tonnes |          | 22891  |  |
| Netherlands    | Soybeans                 | 2018 | tonnes |          |        |  |
| Netherlands    | Wheat                    | 2018 | tonnes | 985297   |        |  |
| NewCaledonia   | Maize                    | 2018 | tonnes | 10184    |        |  |
| NewCaledonia   | Potatoes                 | 2018 | tonnes | 2510     |        |  |
| NewCaledonia   | Wheat                    | 2018 | tonnes | 4        |        |  |
| NewZealand     | Apples                   | 2018 | tonnes | 453911   |        |  |
| NewZealand     | Barley                   | 2018 | tonnes | 379704   |        |  |
| NewZealand     | Grapes                   | 2018 | tonnes | 426781   |        |  |
| NewZealand     | Maize                    | 2018 | tonnes | 191993   |        |  |
| NewZealand     | Peas,dry                 | 2018 | tonnes | 19380    |        |  |
| NewZealand     | Potatoes                 | 2018 | tonnes | 511776   |        |  |
| NewZealand     | Pumpkins,squashandgourds | 2018 | tonnes |          | 114392 |  |
| NewZealand     | Rice,paddy               | 2018 | tonnes |          |        |  |
| NewZealand     | Soybeans                 | 2018 | tonnes |          |        |  |
| NewZealand     | Wheat                    | 2018 | tonnes | 371027   |        |  |
| Nicaragua      | Maize                    | 2018 | tonnes | 395226   |        |  |
| Nicaragua      | Potatoes                 | 2018 | tonnes | 66167    |        |  |
| Nicaragua      | Rice,paddy               | 2018 | tonnes | 365000   |        |  |
| Nicaragua      | Soybeans                 | 2018 | tonnes | 10000    |        |  |
| Niger          | Maize                    | 2018 | tonnes | 29536    |        |  |
| Niger          | Peas,dry                 | 2018 | tonnes | 1285     |        |  |
| Niger          | Potatoes                 | 2018 | tonnes | 168568   |        |  |
| Niger          | Pumpkins,squashandgourds | 2018 | tonnes |          | 138864 |  |
| Niger          | Rice,paddy               | 2018 | tonnes | 101607   |        |  |
| Niger          | Wheat                    | 2018 | tonnes | 4807     |        |  |
| Nigeria        | Maize                    | 2018 | tonnes | 10166027 |        |  |
| Nigeria        | Potatoes                 | 2018 | tonnes | 1363368  |        |  |
| Nigeria        | Rice,paddy               | 2018 | tonnes | 6806327  |        |  |
| Nigeria        | Soybeans                 | 2018 | tonnes | 758033   |        |  |
| Nigeria        | Wheat                    | 2018 | tonnes | 65433    |        |  |
| NorthMacedonia | Apples                   | 2018 | tonnes | 140296   |        |  |
| NorthMacedonia | Barley                   | 2018 | tonnes | 130028   |        |  |
| NorthMacedonia | Grapes                   | 2018 | tonnes | 294497   |        |  |
| NorthMacedonia | Maize                    | 2018 | tonnes | 190722   |        |  |
| NorthMacedonia | Peas,dry                 | 2018 | tonnes | 2451     |        |  |
| NorthMacedonia | Potatoes                 | 2018 | tonnes | 181931   |        |  |
| NorthMacedonia | Rice,paddy               | 2018 | tonnes | 19732    |        |  |
| NorthMacedonia | Soybeans                 | 2018 | tonnes | 20       |        |  |

|                 |                          |      |        |          |  |
|-----------------|--------------------------|------|--------|----------|--|
| North Macedonia | Wheat                    | 2018 | tonnes | 241108   |  |
| Norway          | Apples                   | 2018 | tonnes | 14940    |  |
| Norway          | Barley                   | 2018 | tonnes | 400000   |  |
| Norway          | Peas,dry                 | 2018 | tonnes | 2700     |  |
| Norway          | Potatoes                 | 2018 | tonnes | 326400   |  |
| Norway          | Wheat                    | 2018 | tonnes | 123500   |  |
| Oman            | Barley                   | 2018 | tonnes | 1661     |  |
| Oman            | Maize                    | 2018 | tonnes | 6827     |  |
| Oman            | Potatoes                 | 2018 | tonnes | 15813    |  |
| Oman            | Pumpkins,squashandgourds | 2018 | tonnes | 10452    |  |
| Oman            | Wheat                    | 2018 | tonnes | 3679     |  |
| Pakistan        | Apples                   | 2018 | tonnes | 545875   |  |
| Pakistan        | Barley                   | 2018 | tonnes | 55131    |  |
| Pakistan        | Grapes                   | 2018 | tonnes | 87180    |  |
| Pakistan        | Maize                    | 2018 | tonnes | 6308897  |  |
| Pakistan        | Peas,dry                 | 2018 | tonnes | 27125    |  |
| Pakistan        | Pistachios               | 2018 | tonnes | 854      |  |
| Pakistan        | Potatoes                 | 2018 | tonnes | 4591778  |  |
| Pakistan        | Pumpkins,squashandgourds | 2018 | tonnes | 288137   |  |
| Pakistan        | Rice,paddy               | 2018 | tonnes | 10802949 |  |
| Pakistan        | Safflowerseed            | 2018 | tonnes | 0        |  |
| Pakistan        | Soybeans                 | 2018 | tonnes | 29       |  |
| Pakistan        | Wheat                    | 2018 | tonnes | 25076149 |  |
| Palestine       | Apples                   | 2018 | tonnes | 877      |  |
| Palestine       | Barley                   | 2018 | tonnes | 14261    |  |
| Palestine       | Grapes                   | 2018 | tonnes | 34803    |  |
| Palestine       | Peas,dry                 | 2018 | tonnes | 134      |  |
| Palestine       | Potatoes                 | 2018 | tonnes | 57315    |  |
| Palestine       | Pumpkins,squashandgourds | 2018 | tonnes | 45769    |  |
| Palestine       | Safflowerseed            | 2018 | tonnes | 1        |  |
| Palestine       | Wheat                    | 2018 | tonnes | 34167    |  |
| Panama          | Maize                    | 2018 | tonnes | 112446   |  |
| Panama          | Potatoes                 | 2018 | tonnes | 23941    |  |
| Panama          | Rice,paddy               | 2018 | tonnes | 314946   |  |
| Panama          | Soybeans                 | 2018 | tonnes | 68       |  |
| PapuaNewGuinea  | Maize                    | 2018 | tonnes | 14333    |  |
| PapuaNewGuinea  | Potatoes                 | 2018 | tonnes | 1291     |  |
| PapuaNewGuinea  | Pumpkins,squashandgourds | 2018 | tonnes | 152      |  |
| PapuaNewGuinea  | Rice,paddy               | 2018 | tonnes | 850      |  |
| Paraguay        | Apples                   | 2018 | tonnes | 511      |  |
| Paraguay        | Grapes                   | 2018 | tonnes | 1900     |  |
| Paraguay        | Maize                    | 2018 | tonnes | 5344650  |  |
| Paraguay        | Peas,dry                 | 2018 | tonnes | 5829     |  |
| Paraguay        | Potatoes                 | 2018 | tonnes | 3851     |  |
| Paraguay        | Pumpkins,squashandgourds | 2018 | tonnes | 8508     |  |
| Paraguay        | Rice,paddy               | 2018 | tonnes | 894600   |  |
| Paraguay        | Soybeans                 | 2018 | tonnes | 11046971 |  |
| Paraguay        | Wheat                    | 2018 | tonnes | 722400   |  |
| Peru            | Apples                   | 2018 | tonnes | 140569   |  |
| Peru            | Barley                   | 2018 | tonnes | 207215   |  |
| Peru            | Grapes                   | 2018 | tonnes | 645545   |  |
| Peru            | Maize                    | 2018 | tonnes | 1569535  |  |
| Peru            | Peas,dry                 | 2018 | tonnes | 51708    |  |
| Peru            | Potatoes                 | 2018 | tonnes | 5121110  |  |
| Peru            | Pumpkins,squashandgourds | 2018 | tonnes | 221572   |  |
| Peru            | Rice,paddy               | 2018 | tonnes | 3557900  |  |

|             |                          |      |        |          |        |
|-------------|--------------------------|------|--------|----------|--------|
| Peru        | Soybeans                 | 2018 | tonnes | 1530     |        |
| Peru        | Wheat                    | 2018 | tonnes | 195088   |        |
| Philippines | Grapes                   | 2018 | tonnes | 212      |        |
| Philippines | Maize                    | 2018 | tonnes | 7771919  |        |
| Philippines | Peas,dry                 | 2018 | tonnes | 0        |        |
| Philippines | Potatoes                 | 2018 | tonnes | 117423   |        |
| Philippines | Pumpkins,squashandgourds | 2018 | tonnes |          | 281460 |
| Philippines | Rice,paddy               | 2018 | tonnes | 19068094 |        |
| Philippines | Soybeans                 | 2018 | tonnes | 658      |        |
| Poland      | Apples                   | 2018 | tonnes | 3999023  |        |
| Poland      | Barley                   | 2018 | tonnes | 3048273  |        |
| Poland      | Maize                    | 2018 | tonnes | 3864028  |        |
| Poland      | Peas,dry                 | 2018 | tonnes | 71941    |        |
| Poland      | Potatoes                 | 2018 | tonnes | 7478184  |        |
| Poland      | Pumpkins,squashandgourds | 2018 | tonnes |          | 96925  |
| Poland      | Soybeans                 | 2018 | tonnes | 10271    |        |
| Poland      | Wheat                    | 2018 | tonnes | 9820315  |        |
| Portugal    | Apples                   | 2018 | tonnes | 287441   |        |
| Portugal    | Barley                   | 2018 | tonnes | 49584    |        |
| Portugal    | Grapes                   | 2018 | tonnes | 778898   |        |
| Portugal    | Maize                    | 2018 | tonnes | 713880   |        |
| Portugal    | Potatoes                 | 2018 | tonnes | 431088   |        |
| Portugal    | Pumpkins,squashandgourds | 2018 | tonnes |          | 24889  |
| Portugal    | Rice,paddy               | 2018 | tonnes | 160648   |        |
| Portugal    | Safflowerseed            | 2018 | tonnes |          |        |
| Portugal    | Wheat                    | 2018 | tonnes | 67749    |        |
| PuertoRico  | Maize                    | 2018 | tonnes | 102      |        |
| PuertoRico  | Pumpkins,squashandgourds | 2018 | tonnes |          | 10983  |
| PuertoRico  | Rice,paddy               | 2018 | tonnes | 186      |        |
| Qatar       | Barley                   | 2018 | tonnes | 237      |        |
| Qatar       | Grapes                   | 2018 | tonnes | 5        |        |
| Qatar       | Maize                    | 2018 | tonnes | 1806     |        |
| Qatar       | Potatoes                 | 2018 | tonnes | 17       |        |
| Qatar       | Pumpkins,squashandgourds | 2018 | tonnes |          | 4235   |
| Qatar       | Wheat                    | 2018 | tonnes | 15       |        |
| SKorea      | Apples                   | 2018 | tonnes | 475303   |        |
| SKorea      | Barley                   | 2018 | tonnes | 102702   |        |
| SKorea      | Grapes                   | 2018 | tonnes | 177391   |        |
| SKorea      | Maize                    | 2018 | tonnes | 74368    |        |
| SKorea      | Peas,dry                 | 2018 | tonnes | 5        |        |
| SKorea      | Potatoes                 | 2018 | tonnes | 553596   |        |
| SKorea      | Pumpkins,squashandgourds | 2018 | tonnes |          | 321681 |
| SKorea      | Rice,paddy               | 2018 | tonnes | 5185437  |        |
| SKorea      | Soybeans                 | 2018 | tonnes | 89410    |        |
| SKorea      | Wheat                    | 2018 | tonnes | 37577    |        |
| Moldova     | Apples                   | 2018 | tonnes | 665184   |        |
| Moldova     | Barley                   | 2018 | tonnes | 178296   |        |
| Moldova     | Grapes                   | 2018 | tonnes | 730171   |        |
| Moldova     | Maize                    | 2018 | tonnes | 2073775  |        |
| Moldova     | Peas,dry                 | 2018 | tonnes | 31832    |        |
| Moldova     | Potatoes                 | 2018 | tonnes | 174774   |        |
| Moldova     | Pumpkins,squashandgourds | 2018 | tonnes |          | 62454  |
| Moldova     | Rice,paddy               | 2018 | tonnes |          |        |
| Moldova     | Soybeans                 | 2018 | tonnes | 67684    |        |
| Moldova     | Wheat                    | 2018 | tonnes | 1182778  |        |
| Réunion     | Apples                   | 2018 | tonnes | 80       |        |

|                              |                           |      |        |          |         |  |  |
|------------------------------|---------------------------|------|--------|----------|---------|--|--|
| Réunion                      | Grapes                    | 2018 | tonnes | 284      |         |  |  |
| Réunion                      | Maize                     | 2018 | tonnes | 13770    |         |  |  |
| Réunion                      | Potatoes                  | 2018 | tonnes | 4861     |         |  |  |
| Réunion                      | Pumpkins, squashandgourds | 2018 | tonnes |          | 665     |  |  |
| Réunion                      | Rice, paddy               | 2018 | tonnes | 304      |         |  |  |
| Romania                      | Apples                    | 2018 | tonnes | 643856   |         |  |  |
| Romania                      | Barley                    | 2018 | tonnes | 1870710  |         |  |  |
| Romania                      | Grapes                    | 2018 | tonnes | 1144305  |         |  |  |
| Romania                      | Maize                     | 2018 | tonnes | 18663939 |         |  |  |
| Romania                      | Peas, dry                 | 2018 | tonnes | 170747   |         |  |  |
| Romania                      | Potatoes                  | 2018 | tonnes | 3022758  |         |  |  |
| Romania                      | Pumpkins, squashandgourds | 2018 | tonnes |          | 33756   |  |  |
| Romania                      | Rice, paddy               | 2018 | tonnes | 43355    |         |  |  |
| Romania                      | Soybeans                  | 2018 | tonnes | 465609   |         |  |  |
| Romania                      | Wheat                     | 2018 | tonnes | 10143871 |         |  |  |
| Russia                       | Apples                    | 2018 | tonnes | 1859430  |         |  |  |
| Russia                       | Barley                    | 2018 | tonnes | 16991907 |         |  |  |
| Russia                       | Grapes                    | 2018 | tonnes | 627739   |         |  |  |
| Russia                       | Maize                     | 2018 | tonnes | 11419020 |         |  |  |
| Russia                       | Peas, dry                 | 2018 | tonnes | 2304432  |         |  |  |
| Russia                       | Potatoes                  | 2018 | tonnes | 22094960 |         |  |  |
| Russia                       | Pumpkins, squashandgourds | 2018 | tonnes |          | 1189539 |  |  |
| Russia                       | Rice, paddy               | 2018 | tonnes | 1038222  |         |  |  |
| Russia                       | Safflowerseed             | 2018 | tonnes | 25259    |         |  |  |
| Russia                       | Soybeans                  | 2018 | tonnes | 4026850  |         |  |  |
| Russia                       | Wheat                     | 2018 | tonnes | 72136149 |         |  |  |
| Rwanda                       | Barley                    | 2018 | tonnes |          |         |  |  |
| Rwanda                       | Maize                     | 2018 | tonnes | 410280   |         |  |  |
| Rwanda                       | Peas, dry                 | 2018 | tonnes | 12423    |         |  |  |
| Rwanda                       | Potatoes                  | 2018 | tonnes | 847302   |         |  |  |
| Rwanda                       | Pumpkins, squashandgourds | 2018 | tonnes |          | 258154  |  |  |
| Rwanda                       | Rice, paddy               | 2018 | tonnes | 119932   |         |  |  |
| Rwanda                       | Soybeans                  | 2018 | tonnes | 23604    |         |  |  |
| Rwanda                       | Wheat                     | 2018 | tonnes | 10675    |         |  |  |
| SaintKittsandNevis           | Potatoes                  | 2018 | tonnes |          | 0       |  |  |
| SaintLucia                   | Maize                     | 2018 | tonnes |          |         |  |  |
| SaintLucia                   | Pumpkins, squashandgourds | 2018 | tonnes |          | 394     |  |  |
| SaintPierreadDiquelon        | Potatoes                  | 2018 | tonnes |          |         |  |  |
| SaintPierreadDiquelon        | Pumpkins, squashandgourds | 2018 | tonnes |          |         |  |  |
| SaintVincentandtheGrenadines | Apples                    | 2018 | tonnes | 1826     |         |  |  |
| SaintVincentandtheGrenadines | Maize                     | 2018 | tonnes | 1030     |         |  |  |
| SaintVincentandtheGrenadines | Pumpkins, squashandgourds | 2018 | tonnes |          | 462     |  |  |
| SaintVincentandtheGrenadines | Rice, paddy               | 2018 | tonnes |          |         |  |  |
| SaoTomeandPrincipe           | Maize                     | 2018 | tonnes | 941      |         |  |  |
| SaudiArabia                  | Barley                    | 2018 | tonnes | 624702   |         |  |  |
| SaudiArabia                  | Grapes                    | 2018 | tonnes | 44845    |         |  |  |
| SaudiArabia                  | Maize                     | 2018 | tonnes | 15394    |         |  |  |
| SaudiArabia                  | Potatoes                  | 2018 | tonnes | 482305   |         |  |  |
| SaudiArabia                  | Pumpkins, squashandgourds | 2018 | tonnes |          | 57470   |  |  |
| SaudiArabia                  | Rice, paddy               | 2018 | tonnes | 0        |         |  |  |
| SaudiArabia                  | Wheat                     | 2018 | tonnes | 586413   |         |  |  |
| Senegal                      | Maize                     | 2018 | tonnes | 264105   |         |  |  |
| Senegal                      | Potatoes                  | 2018 | tonnes | 79499    |         |  |  |
| Senegal                      | Pumpkins, squashandgourds | 2018 | tonnes |          | 16667   |  |  |
| Senegal                      | Rice, paddy               | 2018 | tonnes | 762776   |         |  |  |
| Senegal                      | Soybeans                  | 2018 | tonnes |          |         |  |  |

|                |                          |      |        |          |        |  |
|----------------|--------------------------|------|--------|----------|--------|--|
| Serbia         | Apples                   | 2018 | tonnes | 460404   |        |  |
| Serbia         | Barley                   | 2018 | tonnes | 410138   |        |  |
| Serbia         | Grapes                   | 2018 | tonnes | 149474   |        |  |
| Serbia         | Maize                    | 2018 | tonnes | 6964770  |        |  |
| Serbia         | Peas,dry                 | 2018 | tonnes |          |        |  |
| Serbia         | Potatoes                 | 2018 | tonnes | 487909   |        |  |
| Serbia         | Soybeans                 | 2018 | tonnes | 645607   |        |  |
| Serbia         | Wheat                    | 2018 | tonnes | 2941601  |        |  |
| SierraLeone    | Maize                    | 2018 | tonnes | 22981    |        |  |
| SierraLeone    | Peas,dry                 | 2018 | tonnes | 3305     |        |  |
| SierraLeone    | Rice,paddy               | 2018 | tonnes | 919785   |        |  |
| Slovakia       | Apples                   | 2018 | tonnes | 43929    |        |  |
| Slovakia       | Barley                   | 2018 | tonnes | 488898   |        |  |
| Slovakia       | Grapes                   | 2018 | tonnes | 52418    |        |  |
| Slovakia       | Maize                    | 2018 | tonnes | 1515834  |        |  |
| Slovakia       | Peas,dry                 | 2018 | tonnes | 16170    |        |  |
| Slovakia       | Potatoes                 | 2018 | tonnes | 169953   |        |  |
| Slovakia       | Pumpkins,squashandgourds | 2018 | tonnes |          | 1590   |  |
| Slovakia       | Soybeans                 | 2018 | tonnes | 104525   |        |  |
| Slovakia       | Wheat                    | 2018 | tonnes | 1927926  |        |  |
| Slovenia       | Apples                   | 2018 | tonnes | 88537    |        |  |
| Slovenia       | Barley                   | 2018 | tonnes | 88037    |        |  |
| Slovenia       | Grapes                   | 2018 | tonnes | 126958   |        |  |
| Slovenia       | Maize                    | 2018 | tonnes | 350489   |        |  |
| Slovenia       | Peas,dry                 | 2018 | tonnes | 1051     |        |  |
| Slovenia       | Potatoes                 | 2018 | tonnes | 72917    |        |  |
| Slovenia       | Soybeans                 | 2018 | tonnes | 5331     |        |  |
| Slovenia       | Wheat                    | 2018 | tonnes | 121901   |        |  |
| SolomonIslands | Rice,paddy               | 2018 | tonnes |          | 2737   |  |
| Somalia        | Maize                    | 2018 | tonnes | 136710   |        |  |
| Somalia        | Rice,paddy               | 2018 | tonnes | 4766     |        |  |
| Somalia        | Wheat                    | 2018 | tonnes | 1033     |        |  |
| SouthAfrica    | Apples                   | 2018 | tonnes | 829636   |        |  |
| SouthAfrica    | Barley                   | 2018 | tonnes | 421500   |        |  |
| SouthAfrica    | Grapes                   | 2018 | tonnes | 1901736  |        |  |
| SouthAfrica    | Maize                    | 2018 | tonnes | 12510000 |        |  |
| SouthAfrica    | Peas,dry                 | 2018 | tonnes | 699      |        |  |
| SouthAfrica    | Potatoes                 | 2018 | tonnes | 2467724  |        |  |
| SouthAfrica    | Pumpkins,squashandgourds | 2018 | tonnes |          | 266746 |  |
| SouthAfrica    | Rice,paddy               | 2018 | tonnes | 3026     |        |  |
| SouthAfrica    | Soybeans                 | 2018 | tonnes | 1640000  |        |  |
| SouthAfrica    | Wheat                    | 2018 | tonnes | 1868000  |        |  |
| SouthSudan     | Maize                    | 2018 | tonnes | 90000    |        |  |
| SouthSudan     | Potatoes                 | 2018 | tonnes |          |        |  |
| SouthSudan     | Pumpkins,squashandgourds | 2018 | tonnes |          | 68273  |  |
| SouthSudan     | Rice,paddy               | 2018 | tonnes |          |        |  |
| SouthSudan     | Wheat                    | 2018 | tonnes |          |        |  |
| Spain          | Apples                   | 2018 | tonnes | 562961   |        |  |
| Spain          | Barley                   | 2018 | tonnes | 9129535  |        |  |
| Spain          | Grapes                   | 2018 | tonnes | 6673481  |        |  |
| Spain          | Maize                    | 2018 | tonnes | 3842519  |        |  |
| Spain          | Peas,dry                 | 2018 | tonnes | 262567   |        |  |
| Spain          | Pistachios               | 2018 | tonnes | 8277     |        |  |
| Spain          | Potatoes                 | 2018 | tonnes | 2010933  |        |  |
| Spain          | Pumpkins,squashandgourds | 2018 | tonnes |          | 717945 |  |
| Spain          | Rice,paddy               | 2018 | tonnes | 808167   |        |  |

|                      |                           |      |        |         |        |
|----------------------|---------------------------|------|--------|---------|--------|
| Spain                | Safflowerseed             | 2018 | tonnes | 14777   |        |
| Spain                | Soybeans                  | 2018 | tonnes | 4249    |        |
| Spain                | Wheat                     | 2018 | tonnes | 7989906 |        |
| Sri Lanka            | Maize                     | 2018 | tonnes | 270041  |        |
| Sri Lanka            | Potatoes                  | 2018 | tonnes | 88897   |        |
| Sri Lanka            | Pumpkins, squashandgourds | 2018 | tonnes |         | 123261 |
| Sri Lanka            | Rice, paddy               | 2018 | tonnes | 3929831 |        |
| Sri Lanka            | Soybeans                  | 2018 | tonnes | 2500    |        |
| Sudan                | Barley                    | 2018 | tonnes |         |        |
| Sudan                | Maize                     | 2018 | tonnes | 45000   |        |
| Sudan                | Potatoes                  | 2018 | tonnes | 442958  |        |
| Sudan                | Pumpkins, squashandgourds | 2018 | tonnes |         | 29235  |
| Sudan                | Rice, paddy               | 2018 | tonnes | 30200   |        |
| Sudan                | Wheat                     | 2018 | tonnes | 595000  |        |
| Suriname             | Maize                     | 2018 | tonnes | 85      |        |
| Suriname             | Rice, paddy               | 2018 | tonnes | 279918  |        |
| Suriname             | Soybeans                  | 2018 | tonnes | 7       |        |
| Sweden               | Apples                    | 2018 | tonnes | 30810   |        |
| Sweden               | Barley                    | 2018 | tonnes | 1094400 |        |
| Sweden               | Peas, dry                 | 2018 | tonnes | 48430   |        |
| Sweden               | Potatoes                  | 2018 | tonnes | 730200  |        |
| Sweden               | Wheat                     | 2018 | tonnes | 1620300 |        |
| Switzerland          | Apples                    | 2018 | tonnes | 222401  |        |
| Switzerland          | Barley                    | 2018 | tonnes | 182120  |        |
| Switzerland          | Grapes                    | 2018 | tonnes | 107776  |        |
| Switzerland          | Maize                     | 2018 | tonnes | 134834  |        |
| Switzerland          | Peas, dry                 | 2018 | tonnes | 16132   |        |
| Switzerland          | Potatoes                  | 2018 | tonnes | 417156  |        |
| Switzerland          | Pumpkins, squashandgourds | 2018 | tonnes |         | 13320  |
| Switzerland          | Soybeans                  | 2018 | tonnes | 5206    |        |
| Switzerland          | Wheat                     | 2018 | tonnes | 497250  |        |
| Syrian Arab Republic | Apples                    | 2018 | tonnes | 302504  |        |
| Syrian Arab Republic | Barley                    | 2018 | tonnes | 390000  |        |
| Syrian Arab Republic | Grapes                    | 2018 | tonnes | 196000  |        |
| Syrian Arab Republic | Maize                     | 2018 | tonnes | 118000  |        |
| Syrian Arab Republic | Peas, dry                 | 2018 | tonnes | 3200    |        |
| Syrian Arab Republic | Pistachios                | 2018 | tonnes | 20800   |        |
| Syrian Arab Republic | Potatoes                  | 2018 | tonnes | 540000  |        |
| Syrian Arab Republic | Pumpkins, squashandgourds | 2018 | tonnes |         | 92700  |
| Syrian Arab Republic | Rice, paddy               | 2018 | tonnes | 0       |        |
| Syrian Arab Republic | Soybeans                  | 2018 | tonnes | 300     |        |
| Syrian Arab Republic | Wheat                     | 2018 | tonnes | 1200000 |        |
| Tajikistan           | Apples                    | 2018 | tonnes | 230651  |        |
| Tajikistan           | Barley                    | 2018 | tonnes | 198817  |        |
| Tajikistan           | Grapes                    | 2018 | tonnes | 241882  |        |
| Tajikistan           | Maize                     | 2018 | tonnes | 237355  |        |
| Tajikistan           | Peas, dry                 | 2018 | tonnes | 8922    |        |
| Tajikistan           | Potatoes                  | 2018 | tonnes | 964644  |        |
| Tajikistan           | Rice, paddy               | 2018 | tonnes | 80446   |        |
| Tajikistan           | Safflowerseed             | 2018 | tonnes | 4342    |        |
| Tajikistan           | Soybeans                  | 2018 | tonnes | 26      |        |
| Tajikistan           | Wheat                     | 2018 | tonnes | 778986  |        |
| Thailand             | Barley                    | 2018 | tonnes | 28288   |        |
| Thailand             | Grapes                    | 2018 | tonnes | 82820   |        |
| Thailand             | Maize                     | 2018 | tonnes | 5004126 |        |
| Thailand             | Potatoes                  | 2018 | tonnes | 125106  |        |

|                   |                          |      |        |          |  |
|-------------------|--------------------------|------|--------|----------|--|
| Thailand          | Pumpkins,squashandgourds | 2018 | tonnes | 120851   |  |
| Thailand          | Rice,paddy               | 2018 | tonnes | 82192087 |  |
| Thailand          | Soybeans                 | 2018 | tonnes | 56000    |  |
| Thailand          | Wheat                    | 2018 | tonnes | 1351     |  |
| Tiador-Leste      | Maize                    | 2018 | tonnes | 101564   |  |
| Tiador-Leste      | Potatoes                 | 2018 | tonnes | 1167     |  |
| Tiador-Leste      | Rice,paddy               | 2018 | tonnes | 89647    |  |
| Tiador-Leste      | Soybeans                 | 2018 | tonnes | 1008     |  |
| Togo              | Maize                    | 2018 | tonnes | 88630    |  |
| Togo              | Rice,paddy               | 2018 | tonnes | 145489   |  |
| Togo              | Soybeans                 | 2018 | tonnes | 1569     |  |
| Tonga             | Pumpkins,squashandgourds | 2018 | tonnes | 20738    |  |
| TrinidadandTobago | Maize                    | 2018 | tonnes | 2781     |  |
| TrinidadandTobago | Pumpkins,squashandgourds | 2018 | tonnes | 4565     |  |
| TrinidadandTobago | Rice,paddy               | 2018 | tonnes | 588      |  |
| Tunisia           | Apples                   | 2018 | tonnes | 114222   |  |
| Tunisia           | Barley                   | 2018 | tonnes | 700000   |  |
| Tunisia           | Grapes                   | 2018 | tonnes | 148880   |  |
| Tunisia           | Peas,dry                 | 2018 | tonnes | 5050     |  |
| Tunisia           | Pistachios               | 2018 | tonnes | 1958     |  |
| Tunisia           | Potatoes                 | 2018 | tonnes | 423800   |  |
| Tunisia           | Pumpkins,squashandgourds | 2018 | tonnes | 95508    |  |
| Tunisia           | Wheat                    | 2018 | tonnes | 1500000  |  |
| Turkey            | Apples                   | 2018 | tonnes | 3625960  |  |
| Turkey            | Barley                   | 2018 | tonnes | 7000000  |  |
| Turkey            | Grapes                   | 2018 | tonnes | 3933000  |  |
| Turkey            | Maize                    | 2018 | tonnes | 5700000  |  |
| Turkey            | Peas,dry                 | 2018 | tonnes | 2603     |  |
| Turkey            | Pistachios               | 2018 | tonnes | 240000   |  |
| Turkey            | Potatoes                 | 2018 | tonnes | 4550000  |  |
| Turkey            | Pumpkins,squashandgourds | 2018 | tonnes | 616777   |  |
| Turkey            | Rice,paddy               | 2018 | tonnes | 940000   |  |
| Turkey            | Safflowerseed            | 2018 | tonnes | 35000    |  |
| Turkey            | Soybeans                 | 2018 | tonnes | 140000   |  |
| Turkey            | Wheat                    | 2018 | tonnes | 20000000 |  |
| Turkmenistan      | Apples                   | 2018 | tonnes | 63398    |  |
| Turkmenistan      | Barley                   | 2018 | tonnes | 18969    |  |
| Turkmenistan      | Grapes                   | 2018 | tonnes | 239258   |  |
| Turkmenistan      | Maize                    | 2018 | tonnes | 40000    |  |
| Turkmenistan      | Peas,dry                 | 2018 | tonnes | 12904    |  |
| Turkmenistan      | Potatoes                 | 2018 | tonnes | 293530   |  |
| Turkmenistan      | Rice,paddy               | 2018 | tonnes | 130000   |  |
| Turkmenistan      | Wheat                    | 2018 | tonnes | 1000000  |  |
| Uganda            | Maize                    | 2018 | tonnes | 2964017  |  |
| Uganda            | Peas,dry                 | 2018 | tonnes | 15626    |  |
| Uganda            | Potatoes                 | 2018 | tonnes | 162151   |  |
| Uganda            | Rice,paddy               | 2018 | tonnes | 260796   |  |
| Uganda            | Soybeans                 | 2018 | tonnes | 29000    |  |
| Uganda            | Wheat                    | 2018 | tonnes | 23587    |  |
| Ukraine           | Apples                   | 2018 | tonnes | 1462360  |  |
| Ukraine           | Barley                   | 2018 | tonnes | 7348140  |  |
| Ukraine           | Grapes                   | 2018 | tonnes | 467630   |  |
| Ukraine           | Maize                    | 2018 | tonnes | 35801050 |  |
| Ukraine           | Peas,dry                 | 2018 | tonnes | 775800   |  |
| Ukraine           | Potatoes                 | 2018 | tonnes | 22503970 |  |
| Ukraine           | Pumpkins,squashandgourds | 2018 | tonnes | 1338000  |  |

|                    |                           |      |        |           |  |
|--------------------|---------------------------|------|--------|-----------|--|
| Ukraine            | Rice, paddy               | 2018 | tonnes | 69210     |  |
| Ukraine            | Safflowerseed             | 2018 | tonnes | 109       |  |
| Ukraine            | Soybeans                  | 2018 | tonnes | 4460770   |  |
| Ukraine            | Wheat                     | 2018 | tonnes | 24952940  |  |
| UnitedArabEmirates | Barley                    | 2018 | tonnes | 114       |  |
| UnitedArabEmirates | Grapes                    | 2018 | tonnes | 31        |  |
| UnitedArabEmirates | Maize                     | 2018 | tonnes | 8942      |  |
| UnitedArabEmirates | Potatoes                  | 2018 | tonnes | 451       |  |
| UnitedArabEmirates | Pumpkins, squashandgourds | 2018 | tonnes | 20501     |  |
| UnitedArabEmirates | Wheat                     | 2018 | tonnes |           |  |
| UK                 | Apples                    | 2018 | tonnes | 502700    |  |
| UK                 | Barley                    | 2018 | tonnes | 6510000   |  |
| UK                 | Grapes                    | 2018 | tonnes | 587       |  |
| UK                 | Peas, dry                 | 2018 | tonnes | 106700    |  |
| UK                 | Potatoes                  | 2018 | tonnes | 5028000   |  |
| UK                 | Wheat                     | 2018 | tonnes | 13555000  |  |
| Tanzania           | Barley                    | 2018 | tonnes | 12422     |  |
| Tanzania           | Grapes                    | 2018 | tonnes | 4744      |  |
| Tanzania           | Maize                     | 2018 | tonnes | 5858905   |  |
| Tanzania           | Peas, dry                 | 2018 | tonnes | 115391    |  |
| Tanzania           | Potatoes                  | 2018 | tonnes | 1765154   |  |
| Tanzania           | Rice, paddy               | 2018 | tonnes | 3016695   |  |
| Tanzania           | Safflowerseed             | 2018 | tonnes | 15391     |  |
| Tanzania           | Soybeans                  | 2018 | tonnes | 5263      |  |
| Tanzania           | Wheat                     | 2018 | tonnes | 104870    |  |
| USA                | Apples                    | 2018 | tonnes | 4652500   |  |
| USA                | Barley                    | 2018 | tonnes | 3332970   |  |
| USA                | Grapes                    | 2018 | tonnes | 6800970   |  |
| USA                | Maize                     | 2018 | tonnes | 392450840 |  |
| USA                | Peas, dry                 | 2018 | tonnes | 732530    |  |
| USA                | Pistachios                | 2018 | tonnes | 447700    |  |
| USA                | Potatoes                  | 2018 | tonnes | 20607342  |  |
| USA                | Pumpkins, squashandgourds | 2018 | tonnes | 683038    |  |
| USA                | Rice, paddy               | 2018 | tonnes | 10170040  |  |
| USA                | Safflowerseed             | 2018 | tonnes | 107220    |  |
| USA                | Soybeans                  | 2018 | tonnes | 123664230 |  |
| USA                | Wheat                     | 2018 | tonnes | 51286540  |  |
| Uruguay            | Apples                    | 2018 | tonnes | 48434     |  |
| Uruguay            | Barley                    | 2018 | tonnes | 607800    |  |
| Uruguay            | Grapes                    | 2018 | tonnes | 104832    |  |
| Uruguay            | Maize                     | 2018 | tonnes | 816600    |  |
| Uruguay            | Peas, dry                 | 2018 | tonnes | 2735      |  |
| Uruguay            | Potatoes                  | 2018 | tonnes | 87000     |  |
| Uruguay            | Pumpkins, squashandgourds | 2018 | tonnes | 26008     |  |
| Uruguay            | Rice, paddy               | 2018 | tonnes | 1360000   |  |
| Uruguay            | Soybeans                  | 2018 | tonnes | 1334000   |  |
| Uruguay            | Wheat                     | 2018 | tonnes | 440000    |  |
| Uzbekistan         | Apples                    | 2018 | tonnes | 1130935   |  |
| Uzbekistan         | Barley                    | 2018 | tonnes | 111760    |  |
| Uzbekistan         | Grapes                    | 2018 | tonnes | 1589784   |  |
| Uzbekistan         | Maize                     | 2018 | tonnes | 413165    |  |
| Uzbekistan         | Peas, dry                 | 2018 | tonnes | 3981      |  |
| Uzbekistan         | Pistachios                | 2018 | tonnes | 596       |  |
| Uzbekistan         | Potatoes                  | 2018 | tonnes | 2911933   |  |
| Uzbekistan         | Rice, paddy               | 2018 | tonnes | 221089    |  |
| Uzbekistan         | Safflowerseed             | 2018 | tonnes | 4212      |  |



|                                 |                          |      |        |          |  |  |  |
|---------------------------------|--------------------------|------|--------|----------|--|--|--|
| Uzbekistan                      | Soybeans                 | 2018 | tonnes | 11399    |  |  |  |
| Uzbekistan                      | Wheat                    | 2018 | tonnes | 5410760  |  |  |  |
| Vanuatu                         | Maize                    | 2018 | tonnes | 917      |  |  |  |
| Venezuela(BolivarianRepublicof) | Grapes                   | 2018 | tonnes | 19798    |  |  |  |
| Venezuela(BolivarianRepublicof) | Maize                    | 2018 | tonnes | 1318418  |  |  |  |
| Venezuela(BolivarianRepublicof) | Peas,dry                 | 2018 | tonnes | 180      |  |  |  |
| Venezuela(BolivarianRepublicof) | Potatoes                 | 2018 | tonnes | 371744   |  |  |  |
| Venezuela(BolivarianRepublicof) | Pumpkins,squashandgourds | 2018 | tonnes | 97771    |  |  |  |
| Venezuela(BolivarianRepublicof) | Rice,paddy               | 2018 | tonnes | 494549   |  |  |  |
| Venezuela(BolivarianRepublicof) | Soybeans                 | 2018 | tonnes | 6000     |  |  |  |
| Venezuela(BolivarianRepublicof) | Wheat                    | 2018 | tonnes | 144      |  |  |  |
| VietNam                         | Grapes                   | 2018 | tonnes | 25165    |  |  |  |
| VietNam                         | Maize                    | 2018 | tonnes | 4874054  |  |  |  |
| VietNam                         | Potatoes                 | 2018 | tonnes | 376377   |  |  |  |
| VietNam                         | Rice,paddy               | 2018 | tonnes | 44046230 |  |  |  |
| VietNam                         | Soybeans                 | 2018 | tonnes | 81348    |  |  |  |
| WesternSahara                   | Barley                   | 2018 | tonnes | 1857     |  |  |  |
| Yemen                           | Apples                   | 2018 | tonnes | 16901    |  |  |  |
| Yemen                           | Barley                   | 2018 | tonnes | 19887    |  |  |  |
| Yemen                           | Grapes                   | 2018 | tonnes | 136227   |  |  |  |
| Yemen                           | Maize                    | 2018 | tonnes | 42988    |  |  |  |
| Yemen                           | Peas,dry                 | 2018 | tonnes | 2417     |  |  |  |
| Yemen                           | Potatoes                 | 2018 | tonnes | 248829   |  |  |  |
| Yemen                           | Pumpkins,squashandgourds | 2018 | tonnes | 13052    |  |  |  |
| Yemen                           | Wheat                    | 2018 | tonnes | 105503   |  |  |  |
| Zambia                          | Barley                   | 2018 | tonnes | 8767     |  |  |  |
| Zambia                          | Maize                    | 2018 | tonnes | 2324207  |  |  |  |
| Zambia                          | Potatoes                 | 2018 | tonnes | 13546    |  |  |  |
| Zambia                          | Rice,paddy               | 2018 | tonnes | 43053    |  |  |  |
| Zambia                          | Soybeans                 | 2018 | tonnes | 302720   |  |  |  |
| Zambia                          | Wheat                    | 2018 | tonnes | 114463   |  |  |  |
| Zimbabwe                        | Apples                   | 2018 | tonnes | 6460     |  |  |  |
| Zimbabwe                        | Barley                   | 2018 | tonnes | 55854    |  |  |  |
| Zimbabwe                        | Grapes                   | 2018 | tonnes | 3443     |  |  |  |
| Zimbabwe                        | Maize                    | 2018 | tonnes | 730437   |  |  |  |
| Zimbabwe                        | Potatoes                 | 2018 | tonnes | 60621    |  |  |  |
| Zimbabwe                        | Rice,paddy               | 2018 | tonnes | 755      |  |  |  |
| Zimbabwe                        | Soybeans                 | 2018 | tonnes | 90000    |  |  |  |
| Zimbabwe                        | Wheat                    | 2018 | tonnes | 41488    |  |  |  |

```
;
```

```
proc means;
```

```
run;
```

(\*\*\*\*\* DATA Corona 1 June 2020 \*\*\*\*\*)

data corona;

| input num | country     | S       | Totalcases | Newcases | TotalDeaths | NewDeaths | TotalRecovered | ActiveCases | SeriousCases | TotCasesInpop | DeathsInpop; |
|-----------|-------------|---------|------------|----------|-------------|-----------|----------------|-------------|--------------|---------------|--------------|
| 1         | USA         | 1837578 | 408        | 106198   | 3           | 699875    | 1131505        | 17075       | 5554         |               |              |
| 2         | Brazil      | 614992  | 143        | 29341    | 27          | 206366    | 279096         | 8318        | 2424         |               |              |
| 3         | Russia      | 414878  | 9035       | 4856     | 162         | 175877    | 234148         | 2300        | 2843         |               |              |
| 4         | Spain       | 288509  | .          | 27127    | .           | 198958    | 62424          | 617         | 8129         | 580           |              |
| 5         | UK          | 274782  | .          | 38489    | .           | 1559      | 4049           | 587         |              |               |              |
| 6         | Italy       | 232997  | .          | 33415    | .           | 157507    | 42075          | 435         | 3853         | 553           |              |
| 7         | India       | 191327  | 718        | 5413     | 5           | 92027     | 93887          | 8944        | 139          | 4             |              |
| 8         | France      | 188862  | .          | 28802    | .           | 88385     | 91725          | 1319        | 2894         | 441           |              |
| 9         | Germany     | 183494  | .          | 8505     | .           | 165900    | 8989           | 702         | 2191         | 103           |              |
| 10        | Peru        | 184478  | .          | 4508     | .           | 87208     | 92782          | 988         | 4994         | 137           |              |
| 11        | Turkey      | 163942  | .          | 4540     | .           | 127973    | 31429          | 648         | 1046         | 54            |              |
| 12        | Iran        | 154445  | 2979       | 7878     | 81          | 121004    | 25883          | 2578        | 1841         | 9             |              |
| 13        | Chile       | 99638   | .          | 1054     | .           | 42727     | 59907          | 1383        | 5219         | 56            |              |
| 14        | Canada      | 90947   | .          | 7295     | .           | 48879     | 34773          | 1641        | 2411         | 193           |              |
| 15        | Mexico      | 90864   | 3132       | 9930     | 151         | 64326     | 16405          | 378         | 704          | 77            |              |
| 16        | SaudiArabia | 88261   | .          | 503      | .           | 62442     | 22316          | 384         | 2452         | 14            |              |
| 17        | China       | 83017   | 16         | 4634     | .           | 78307     | 76             | 3           | 55           | 3             |              |
| 18        | Pakistan    | 72480   | 2964       | 1543     | 60          | 26283     | 44834          | 111         | 329          | 7             |              |
| 19        | Belgium     | 58517   | 136        | 9486     | 19          | 15919     | 33112          | 163         | 5051         | 81            |              |
| 20        | Bahar       | 56910   | .          | 38       | .           | 30230     | 26582          | 232         | 19783        | 13            |              |
| 21        | Bangladesh  | 49534   | 2381       | 672      | 22          | 10597     | 38265          | 1           | 301          | 4             |              |
| 22        | Netherlands | 46442   | .          | 5956     | .           | 159       | 2711           | 348         |              |               |              |
| 23        | Belarus     | 42556   | .          | 235      | .           | 18514     | 23807          | 92          | 4503         | 25            |              |
| 24        | Ecuador     | 39098   | .          | 3358     | .           | 19502     | 16148          | 220         | 2219         | 191           |              |
| 25        | Sweden      | 37542   | .          | 4395     | .           | 4971      | 29176          | 226         | 3719         | 436           |              |
| 26        | Singapore   | 35292   | 408        | 23       | .           | 21699     | 13570          | 8           | 8036         | 4             |              |
| 27        | UAE         | 34557   | 264        | 683      | 17932       | 16361     | 1              | 3498        | 27           |               |              |
| 28        | SouthAfrica | 32883   | .          | 683      | .           | 16909     | 15191          | 129         | 552          | 12            |              |
| 29        | Portugal    | 32900   | .          | 1410     | .           | 19409     | 11081          | 64          | 3187         | 138           |              |
| 30        | Switzerland | 30871   | 9          | 1920     | .           | 28500     | 451            | 28          | 3589         | 222           |              |
| 31        | Colombia    | 28083   | .          | 939      | .           | 8543      | 18901          | 136         | 578          | 18            |              |
| 32        | Kuwait      | 27782   | 719        | 220      | 8           | 12889     | 14843          | 204         | 8509         | 52            |              |
| 33        | Indonesia   | 26940   | 467        | 1641     | 28          | 7637      | 17662          | .           | 89           | 6             |              |
| 34        | Ireland     | 24980   | .          | 1852     | .           | 22089     | 1249           | 36          | 5066         | 326           |              |
| 35        | Egypt       | 24985   | .          | 989      | .           | 6037      | 17989          | 41          | 245          | 9             |              |
| 36        | Ukraine     | 24012   | 240        | 718      | 10          | 9690      | 13634          | 283         | 649          | 16            |              |
| 40        | Poland      | 23987   | 201        | 1045     | 1           | 11449     | 11473          | 160         | 634          | 28            |              |
| 38        | Romania     | 19388   | 141        | 1270     | 4           | 13426     | 4702           | 158         | 1008         | 66            |              |
| 39        | Philippines | 18838   | 552        | 960      | 9           | 2979      | 13889          | 73          | 170          | 9             |              |
| 40        | domin       | 17285   | .          | 502      | .           | 10559     | 6224           | 110         | 1595         | 46            |              |
| 41        | Israel      | 17106   | 35         | 285      | .           | 14826     | 1895           | 33          | 1960         | 31            |              |
| 42        | Japan       | 16851   | .          | 891      | .           | 14169     | 1501           | 119         | 133          | 7             |              |
| 43        | Argentina   | 16851   | .          | 539      | .           | 6336      | 10976          | 269         | 373          | 12            |              |
| 44        | Austria     | 16731   | .          | 968      | .           | 15593     | 470            | 27          | 1869         | 74            |              |
| 45        | Afghanistan | 15759   | 545        | 265      | 8           | 1428      | 14067          | 19          | 406          | 7             |              |
| 46        | Panama      | 13463   | .          | 336      | .           | 9514      | 3613           | 79          | 3126         | 78            |              |
| 47        | Oman        | 12223   | 786        | 60       | 1           | 2682      | 9491           | 31          | 2399         | 10            |              |
| 48        | Denmark     | 11989   | .          | 574      | .           | 10362     | 733            | 20          | 2015         | 89            |              |

|     |                        |       |     |     |     |       |      |      |      |      |    |
|-----|------------------------|-------|-----|-----|-----|-------|------|------|------|------|----|
| 49  | S. Korea               | 11503 | 35  | 271 | 1   | 10422 | 810  | 15   | 224  | 5    |    |
| 50  | Serbia                 | 11412 | .   | 243 | .   | 6698  | 4471 | 10   | 1306 | 28   |    |
| 51  | Bahrain                | 11398 | .   | 19  | .   | 6673  | 4706 | 12   | 6721 | 11   |    |
| 52  | Kazakhstan             | 11308 | 450 | 41  | 1   | 5404  | 5963 | 62   | 603  | 2    |    |
| 53  | Nigeria                | 10162 | .   | 287 | .   | 3007  | 6968 | 7    | 49   | 1    |    |
| 54  | Bolivia                | 9962  | 390 | 313 | 3   | 968   | 8701 | 3    | 866  | 27   |    |
| 55  | Armenia                | 9492  | 210 | 139 | 8   | 3402  | 5961 | 10   | 3204 | 47   |    |
| 56  | Algeria                | 9394  | .   | 663 | .   | 5748  | 2993 | 23   | 215  | 15   |    |
| 57  | Czechia                | 9273  | 5   | 326 | .   | 6562  | 2391 | 15   | 886  | 30   |    |
| 58  | Norway                 | 8440  | .   | 238 | .   | 7727  | 477  | 8    | 1558 | 44   |    |
| 59  | Moldova                | 8251  | .   | 295 | .   | 4681  | 3375 | 251  | 2045 | 73   |    |
| 60  | Ghana                  | 8070  | 189 | 38  | .   | 2947  | 5687 | 3    | 260  | 1    |    |
| 61  | Malaysia               | 7897  | 38  | 115 | .   | 8404  | 1338 | 8    | 243  | 4    |    |
| 62  | Morocco                | 7819  | 12  | 205 | .   | 5734  | 1860 | 18   | 212  | 8    |    |
| 63  | Australia              | 7204  | 9   | 103 | .   | 6819  | 462  | 3    | 283  | 4    |    |
| 64  | Finland                | 6985  | 28  | 320 | .   | 5500  | 1085 | 10   | 1243 | 58   |    |
| 65  | Iraq                   | 6439  | .   | 205 | .   | 3158  | 3078 | 38   | 160  | 5    |    |
| 66  | Cameroon               | 5904  | .   | 191 | .   | 3568  | 2145 | 28   | 223  | 7    |    |
| 67  | Azerbaijan             | 5494  | .   | 83  | .   | 3428  | 2035 | 42   | 542  | 6    |    |
| 68  | Honduras               | 5202  | 108 | 212 | 11  | 537   | 4453 | 13   | 528  | 21   |    |
| 69  | Guatemala              | 5087  | 348 | 108 | 6   | 735   | 4244 | 5    | 284  | 6    |    |
| 70  | Sudan                  | 5006  | .   | 286 | .   | 1423  | 3317 | .    | 115  | 7    |    |
| 71  | Luxembourg             | 4018  | .   | 110 | .   | 3833  | 75   | 3    | 6428 | 176  |    |
| 72  | Tajikistan             | 3930  | .   | 47  | .   | 2004  | 1679 | .    | 413  | 5    |    |
| 73  | Hungary                | 3892  | 16  | 537 | 1   | 2156  | 1209 | 25   | 403  | 55   |    |
| 74  | Senegal                | 3739  | 94  | 42  | .   | 1858  | 1839 | 14   | 224  | 3    |    |
| 75  | Guinea                 | 3706  | .   | 23  | .   | 2030  | 1633 | 24   | 283  | 2    |    |
| 76  | Uzbekistan             | 3662  | 39  | 15  | .   | 2837  | 810  | 9    | 110  | 0    |    |
| 77  | Djibouti               | 3354  | .   | 24  | .   | 1504  | 1826 | .    | 3399 | 24   |    |
| 78  | Thailand               | 3082  | 1   | 57  | .   | 2965  | 60   | 1    | 44   | 1    |    |
| 79  | DRC                    | 3070  | .   | 72  | .   | 448   | 2550 | .    | 34   | 1    |    |
| 80  | Greece                 | 2917  | .   | 175 | .   | 1374  | 1368 | 13   | 280  | 17   |    |
| 81  | Ivory Coast            | 2833  | .   | 33  | .   | 1436  | 1365 | .    | 106  | 1    |    |
| 82  | Gabon                  | 2655  | .   | 17  | .   | 722   | 1916 | 15   | 1195 | 8    |    |
| 83  | El Salvador            | 2582  | 65  | 46  | .   | 1063  | 1473 | 53   | 396  | 7    |    |
| 84  | Bosnia and Herzegovina | 2524  | 14  | 14  | 154 | 1     | 1898 | 482  | 4    | 769  |    |
| 85  | Bulgaria               | 2519  | 6   | 140 | .   | 1080  | 1268 | 17   | 362  | 20   |    |
| 86  | Croatia                | 2246  | .   | 103 | .   | 2072  | 71   | 4    | 547  | 25   |    |
| 87  | North Macedonia        | 2228  | .   | 133 | .   | .     | 1552 | 541  | 21   | 1068 | 64 |
| 88  | Haiti                  | 2124  | 259 | 44  | 3   | 24    | 2056 | .    | 186  | 4    |    |
| 89  | Cuba                   | 2045  | .   | 83  | .   | 1809  | 153  | 4    | 181  | 7    |    |
| 90  | Senalia                | 1976  | .   | 78  | .   | 348   | 1650 | 2    | 126  | 5    |    |
| 91  | Kenya                  | 1962  | .   | 64  | .   | 478   | 1420 | 7    | 37   | 1    |    |
| 92  | Estonia                | 1870  | 1   | 68  | .   | 1625  | 177  | .    | 1410 | 51   |    |
| 93  | Kyrgyzstan             | 1817  | 69  | 16  | .   | 1181  | 620  | 4    | 279  | 2    |    |
| 94  | Iceland                | 1806  | .   | 10  | .   | 1794  | 2    | .    | 5295 | 29   |    |
| 95  | Nepal                  | 1798  | 226 | 8   | .   | 221   | 1689 | .    | 62   | 0    |    |
| 96  | Maldives               | 1773  | .   | 5   | .   | 463   | 1315 | 9    | 3285 | 9    |    |
| 97  | Mayotte                | 1699  | .   | 21  | .   | 1385  | 293  | 9    | 6242 | 77   |    |
| 98  | Lithuania              | 1678  | 3   | 70  | .   | 1236  | 372  | 17   | 616  | 26   |    |
| 99  | Sri Lanka              | 1633  | .   | 11  | 1   | 801   | 821  | 1    | 76   | 1    |    |
| 100 | Slovakia               | 1522  | 1   | 28  | .   | 1368  | 126  | .    | 279  | 5    |    |
| 101 | Venezuela              | 1510  | .   | 14  | .   | 302   | 1194 | 3    | 63   | 1    |    |
| 102 | New Zealand            | 1504  | .   | 22  | .   | 1481  | 1    | .    | 391  | 4    |    |
| 103 | Slovenia               | 1473  | .   | 109 | 1   | 1368  | 6    | 1    | 709  | 62   |    |
| 104 | Equatorial Guinea      | 1308  | .   | 12  | .   | .     | 200  | 1094 | .    | 934  | 9  |

|     |                    |      |    |    |    |      |     |      |       |      |     |   |
|-----|--------------------|------|----|----|----|------|-----|------|-------|------|-----|---|
| 105 | Wall               | 1265 | .  | 77 | .  | 716  | 472 | .    | 63    | 4    |     |   |
| 106 | Guinea-Bissau      | 1256 | .  |    | 6  |      | 42  | 1206 | .     | 640  | 4   | 4 |
| 107 | Lebanon            | 1220 | .  | 27 | .  | 712  | 481 | 3    | 179   | 4    |     |   |
| 108 | Ethiopia           | 1172 | .  | 11 | .  | 209  | 952 | 4    | 10    | 0    |     |   |
| 109 | Albania            | 1143 | 6  | 33 | .  | 877  | 233 | 3    | 397   | 11   |     |   |
| 110 | Zambia             | 1089 | 32 | 7  | .  | 912  | 170 | 1    | 59    | 0    |     |   |
| 111 | HongKong           | 1088 | 3  | 4  | .  | 1037 | 47  | 2    | 145   | 1    |     |   |
| 112 | Tunisia            | 1084 | 7  | 48 | .  | 964  | 72  | 2    | 52    | 4    |     |   |
| 113 | Latvia             | 1066 | .  | 24 | .  | 745  | 297 | 3    | 585   | 13   |     |   |
| 114 | CostaRica          | 1056 | .  | 10 | .  | 689  | 377 | 4    | 207   | 2    |     |   |
| 115 | CAR                | 1011 | .  | 2  | .  | 23   | 988 | .    | 210   | 0    |     |   |
| 116 | SouthSudan         | 994  | .  | 10 | .  | 8    | 978 | .    | 89    | 1    |     |   |
| 117 | Paraguay           | 986  | .  | 11 | .  | 477  | 498 | 2    | 138   | 2    |     |   |
| 118 | Niger              | 958  | .  | 64 | .  | 809  | 55  | .    | 40    | 3    |     |   |
| 119 | Cyprus             | 944  | .  | 17 | .  | 790  | 137 | 4    | 752   | 14   |     |   |
| 120 | SierraLeone        | 861  | .  | 48 | .  |      | 454 | 361  | .     | 108  | 6   |   |
| 121 | BurkinaFaso        | 847  | .  | 55 | .  |      | 720 | 74   | .     | 41   | 3   |   |
| 122 | Madagascar         | 825  | 55 | 6  | .  |      | 174 | 646  | 8     | 30   | 0   |   |
| 123 | Uruguay            | 823  | .  | 22 | .  | 685  | 116 | 5    | 237   | 6    |     |   |
| 124 | Georgia            | 794  | 11 | 12 | .  | 624  | 158 | 8    | 199   | 3    |     |   |
| 125 | Chad               | 778  | .  | 65 | .  | 491  | 222 | .    | 47    | 4    |     |   |
| 126 | Andorra            | 764  | .  | 51 | .  | 694  | 19  | 4    | 969   | 960  |     |   |
| 127 | Nicaragua          | 759  | .  | 35 | .  | 370  | 354 | .    | 115   | 5    |     |   |
| 128 | Jordan             | 739  | .  | 9  | .  | 522  | 208 | 5    | 72    | 1    |     |   |
| 129 | DiamondPrincess    | 712  | .  |    | 13 |      | 651 | 45   | 4     |      |     |   |
| 130 | SanMarino          | 671  | .  | 42 | .  | 358  | 270 | 1    | 19779 | 1238 |     |   |
| 131 | Malta              | 619  | 1  | 9  | .  | 537  | 73  | 1    | 1402  | 20   |     |   |
| 132 | Congo              | 611  | .  | 20 | .  | 179  | 412 | .    | 111   | 4    |     |   |
| 133 | Jamaica            | 595  | 5  | 9  | .  | 311  | 265 | 2    | 198   | 3    |     |   |
| 134 | ChannelIslands     | 560  | .  |    | 45 |      | 515 | 0    |       | 3223 | 259 |   |
| 135 | Mauritania         | 530  | .  | 23 | .  | 27   | 480 | .    | 114   | 5    |     |   |
| 136 | Tanzania           | 509  | .  | 21 | .  | 183  | 305 | 7    | 9     | 0    |     |   |
| 137 | FrenchGuiana       | 499  | .  | 1  | .  |      | 200 | 290  | 2     | 1675 | 3   |   |
| 138 | SaoTomeandPrincipe | 483  | .  |    | 12 |      | 60  | 400  | .     | 2206 | 55  |   |
| 139 | Réunion            | 471  | .  | 1  | .  | 411  | 59  | 1    | 526   | 1    |     |   |
| 140 | Upanda             | 457  | 40 |    | .  | 72   | 385 | .    | 10    |      |     |   |
| 141 | Palestine          | 448  | 1  | 3  | .  | 372  | 74  | .    | 80    | 1    |     |   |
| 142 | Taiwan             | 443  | 1  | 7  | .  | 427  | 9   | .    | 19    | 0    |     |   |
| 143 | Togo               | 442  | .  | 53 | .  | 211  | 218 | .    | 54    | 2    |     |   |
| 144 | CaboVerde          | 435  | .  | 4  | .  | 193  | 238 | .    | 783   | 7    |     |   |
| 145 | Rwanda             | 370  | .  | 1  | .  | 266  | 113 | .    | 29    | 0    |     |   |
| 146 | IsleofMan          | 336  | .  | 24 | .  | 308  | 3   | .    | 3933  | 282  |     |   |
| 147 | Mauritius          | 336  | .  | 10 | .  | 322  | 3   | .    | 263   | 8    |     |   |
| 148 | Vietnam            | 328  | .  |    | .  | 290  | 35  | 1    | 3     |      |     |   |
| 149 | Montenegro         | 324  | .  | 9  | .  | 315  | 0   | .    | 516   | 14   |     |   |
| 150 | Yemen              | 323  | .  | 80 | .  | 14   | 229 | .    | 11    | 8    |     |   |
| 151 | Liberia            | 288  | .  | 27 | .  | 157  | 104 | .    | 57    | 5    |     |   |
| 152 | Eswatini           | 285  | .  | 2  | .  | 189  | 94  | .    | 246   | 2    |     |   |
| 153 | Malawi             | 284  | .  | 4  | .  | 42   | 238 | 1    | 15    | 0    |     |   |
| 154 | Mozambique         | 264  | .  | 2  | .  | 91   | 161 | .    | 8     | 0    |     |   |
| 155 | Benin              | 232  | .  | 3  | .  | 143  | 86  | .    | 19    | 0    |     |   |
| 156 | Myanmar            | 228  | 4  | 6  | .  | 138  | 94  | .    | 4     | 0    |     |   |
| 157 | Martinique         | 209  | .  | 14 | .  | 98   | 88  | .    | 533   | 37   |     |   |
| 158 | FaeroeIslands      | 187  | .  |    | .  |      | 187 | 0    |       | 3828 |     |   |
| 159 | Mongolia           | 185  | 6  |    | .  | 44   | 141 | 19   | 57    |      |     |   |
| 160 | Zimbabwe           | 178  | .  | 4  | .  | 29   | 145 | .    | 12    | 0    |     |   |

|     |                      |     |   |    |   |     |     |    |       |      |    |
|-----|----------------------|-----|---|----|---|-----|-----|----|-------|------|----|
| 161 | Gibraltar            | 170 | . | .  | . | 151 | 19  | .  | 5046  | .    |    |
| 162 | Guadeloupe           | 162 | . | 14 | . | 138 | 10  | 1  | 405   | 35   |    |
| 163 | Libya                | 156 | . | 5  | . | 52  | 99  | .  | 23    | 1    |    |
| 164 | Guyana               | 153 | . | 12 | . | 70  | 71  | 2  | 195   | 15   |    |
| 165 | Brunei               | 141 | . | 2  | . | 138 | 1   | 1  | 323   | 6    |    |
| 166 | CaymanIslands        | 141 | . | 1  | . | 68  | 72  | .  | 2148  | 15   |    |
| 167 | Bermuda              | 140 | . | 9  | . | 92  | 39  | 2  | 2247  | 144  |    |
| 168 | Cambodia             | 125 | . | .  | . | 123 | 2   | 1  | 7     | .    |    |
| 169 | Syria                | 122 | . | 5  | . | 46  | 71  | .  | 7     | 0    |    |
| 170 | TrinidadandTobago    | 117 | . | .  | 8 | .   | 108 | 1  | .     | 84   | 6  |
| 171 | Comoros              | 106 | . | 2  | . | 26  | 78  | .  | 122   | 2    |    |
| 172 | Bahamas              | 102 | . | 11 | . | 48  | 43  | 1  | 280   | 28   |    |
| 173 | Aruba                | 101 | . | 3  | . | 98  | 0   | .  | 948   | 28   |    |
| 174 | Noroco               | 99  | . | 4  | . | 90  | 5   | 1  | 2524  | 102  |    |
| 175 | Barbados             | 92  | . | 7  | . | 78  | 9   | 1  | 320   | 24   |    |
| 176 | Angola               | 88  | . | 4  | . | 18  | 84  | 1  | 3     | 0    |    |
| 177 | Liechtenstein        | 82  | . | 1  | . | 55  | 26  | .  | 2151  | 28   |    |
| 178 | SintMaarten          | 77  | . | 15 | . | 80  | 2   | 1  | 1798  | 350  |    |
| 179 | Burundi              | 65  | . | 1  | . | 33  | 29  | .  | 5     | 0    |    |
| 180 | FrenchPolynesia      | 60  | . | .  | . | 60  | 0   | .  | 214   | .    |    |
| 181 | Nacao                | 45  | . | .  | . | 45  | 0   | .  | 69    | .    |    |
| 182 | Bhutan               | 43  | . | .  | . | 6   | 37  | .  | 56    | .    |    |
| 183 | SaintMartin          | 41  | . | 3  | . | 33  | 5   | 1  | 1062  | 78   |    |
| 184 | Eritrea              | 39  | . | .  | . | 39  | 0   | .  | 11    | .    |    |
| 185 | Botswana             | 38  | 3 | 1  | . | 20  | 17  | .  | 16    | 0    |    |
| 186 | AntiguaandBarbuda    | 26  | . | .  | 3 | .   | 19  | 4  | 1     | 266  | 31 |
| 187 | St.VincentGrenadines | 26  | . | .  | . | .   | 15  | 11 | .     | 234  | .  |
| 188 | Gambia               | 25  | . | 1  | . | 20  | 4   | .  | 10    | 0    |    |
| 189 | Namibia              | 25  | 1 | .  | . | 16  | 9   | .  | 10    | .    |    |
| 190 | Timor-Leste          | 24  | . | .  | . | 24  | 0   | .  | 18    | .    |    |
| 191 | Suriname             | 23  | . | 1  | . | 9   | 13  | .  | 39    | 2    |    |
| 192 | Grenada              | 23  | . | .  | . | 18  | 5   | 2  | 204   | .    |    |
| 193 | NewCaledonia         | 20  | . | 1  | . | 18  | 2   | .  | 70    | .    |    |
| 194 | Curaçao              | 19  | . | 1  | . | 14  | 4   | .  | 116   | 6    |    |
| 195 | Laos                 | 19  | . | .  | . | 16  | 3   | .  | 3     | .    |    |
| 196 | Belize               | 18  | . | 2  | . | 18  | 0   | .  | 45    | 5    |    |
| 197 | Fiji                 | 18  | . | .  | . | 15  | 3   | .  | 20    | .    |    |
| 198 | SaintLucia           | 18  | . | .  | . | 18  | 0   | .  | 96    | .    |    |
| 199 | Dominica             | 16  | . | .  | . | 16  | 0   | .  | 222   | .    |    |
| 200 | SaintKittsandNevis   | 15  | . | .  | . | .   | 15  | 0  | .     | 282  | .  |
| 201 | FalklandIslands      | 13  | . | .  | . | .   | 13  | 0  | .     | 3746 | .  |
| 202 | Greenland            | 13  | . | .  | . | 11  | 2   | .  | 228   | .    |    |
| 203 | TurksandCaicos       | 12  | . | 1  | . | 11  | 0   | .  | 310   | 26   |    |
| 204 | VaticanCity          | 12  | . | .  | . | 2   | 10  | .  | 14881 | .    |    |
| 205 | Montserrat           | 11  | . | 1  | . | 10  | 0   | .  | 2204  | 200  |    |
| 206 | Seychelles           | 11  | . | .  | . | 11  | 0   | .  | 112   | .    |    |
| 207 | MSZaandar            | 9   | . | 2  | . | .   | 7   | .  | .     | .    |    |
| 208 | WesternSahara        | 9   | . | 1  | . | 6   | 2   | .  | 15    | 2    |    |
| 209 | BritishVirginIslands | 8   | . | .  | 1 | .   | 7   | 0  | .     | 265  | 33 |
| 210 | PapuaNewGuinea       | 8   | . | .  | . | 8   | 0   | .  | 1     | .    |    |
| 211 | CaribbeanNetherlands | 7   | . | .  | . | .   | 7   | 0  | .     | 267  | .  |
| 212 | St.Barth             | 6   | . | .  | . | 6   | 0   | .  | 998   | .    |    |
| 213 | Anguilla             | 3   | . | .  | . | 3   | 0   | .  | 200   | .    |    |
| 214 | Lesotho              | 2   | . | .  | 1 | 1   | 1   | 1  | .     | .    |    |
| 215 | SaintPierre&Miquelon | 1   | . | .  | . | .   | 1   | 0  | .     | 173  | .  |

```

;
run;

proc freq data=animal;
table spe;
run;

/*
-----
      Asses      132      6.70      132      6.70
      Beehives   127      6.45      259      13.15
      Buffalo    46      2.34      305      15.48
      Camelids    2      0.10      307      15.58
      Camels     49      2.49      358      18.07
      Cattle     210     10.81     569      28.88
      Chickens   210     10.81     782      39.70
      Ducks     101      5.15     883      44.82
      Geeseand    57      2.89     940      47.72
      Goats     204     10.36    1144     58.07
      Horses     180      9.14    1324     67.21
      Mules       67      3.42    1411     71.62
      Pigeons     11      0.56    1422     72.18
      Pigs       104      5.35    1616     82.03
      Rabbits     71      3.60    1687     85.63
      Rodents     2      0.10    1689     85.74
      Sheep     105      5.30    1884     95.63
      Turkeys     86      4.37    1970    100.00

*/

data ass;
set animal;
if spe="Asses" ;
keep country value;
rename value=asses;
run;

proc sort data=ass;
by country;
run;

data beeh;
set animal;
if spe="Beehives" ;
keep country value;
rename value=beeh;
run;

proc sort data=beeh;
by country;
run;

```

```
data buff;
set animal;
if spe="Buffaloe" ;
keep country value;
rename value=Buffalo;
run;

proc sort data=buff;
by country;
run;

data camelid;
set animal;
if spe="Camelids" ;
keep country value;
rename value=camelids;
run;

proc sort data=camelid;
by country;
run;
data camels;
set animal;
if spe="Camels" ;
keep country value;
rename value=Camels;
run;

proc sort data=camels;
by country;
run;
data cattle;
set animal;
if spe="Cattle" ;
keep country value;
rename value=cattle;
run;

proc sort data=cattle;
by country;
run;
data chick;
set animal;
if spe="Chickens" ;
keep country value;
rename value=chick;
run;

proc sort data=chick;
by country;
run;

data ducks;
set animal;
if spe="Ducks" ;
```

```
keep country value;
rename value=Ducks;
run;

proc sort data=ducks;
by country;
run;
data gees;
set animal;
if spe="Geeseand" ;
keep country value;
rename value=geeseand;
run;

proc sort data=gees;
by country;
run;

data goat;
set animal;
if spe="Goats" ;
keep country value;
rename value=goats;
run;

proc sort data=goat;
by country;
run;

data horse;
set animal;
if spe="Horses" ;
keep country value;
rename value=horse;
run;

proc sort data=horse;
by country;
run;

data mules;
set animal;
if spe="Mules" ;
keep country value;
rename value=Mule;
run;

proc sort data=mules;
by country;
run;

data pigen;
set animal;
if spe="Pigeons," ;
keep country value;
```



```
rename value=pigen;
run;

proc sort data=pigen;
by country;
run;
data pig;
set animal;
if spe="Pigs" ;
keep country value;
rename value=pigs;
run;

proc sort data=pig;
by country;
run;

data rabbit;
set animal;
if spe="Rabbitsa" ;
keep country value;
rename value=rabbit;
run;

proc sort data=rabbit;
by country;
run;
data roden;
set animal;
if spe="Rodents," ;
keep country value;
rename value=roden;
run;

proc sort data=roden;
by country;
run;

data sheep;
set animal;
if spe="Sheep" ;
keep country value;
rename value=sheep;
run;

proc sort data=sheep;
by country;
run;

data turkey;
set animal;
if spe="Turkeys" ;
```

```
keep country value;
rename value=turkey;
run;
```

```
proc sort data=turkey;
by country;
run;
```

```
data apples;
set drop;
if element="Apples" ;
keep country quantity;
rename quantity=Apples;
run;
```

```
proc sort ;
by country;
run;
```

```
data barley;
set drop;
if element="Barley" ;
keep country quantity;
rename quantity=Barley;
run;
```

```
proc sort ;
by country;
run;
```

```
data maize;
set drop;
if element="Maize" ;
keep country quantity;
rename quantity=Maize;
run;
proc sort ;
by country;
run;
```

```
data all;
merge ass beeh buff camelid camels cattle chick ducks gees horse goat mules pig pigen rabbit roden sh
by country;
run;
```

```
proc sort data=corona;
```

```

by country;
run;

data all2;
merge all corona;
by country;
run;

proc freq data=all2;
table country;
run;

data all3;
set all2;
logtot=log(totalcases+1);
logasses=log(asses+1);
logbeeh=log(beeh+1);
logbuffalo=log(buffalo+1);
logcamels=log(camels+1);
logcattle=log(cattle+1);
logchick=log(chick+1);
logducks=log(ducks+1);
loggeesand=log(geesand+1);
loghorse=log(horse+1);
loggoats=log(goats+1);
logmule=log(mule+1);
logpigs=log(pigs+1);
logsheep=log(sheep+1);
logturkey=log(turkey+1);

lograbbit=log(rabbit+1);

logapples=log(apples+1);
logbarley=log(barley+1);
logmaize=log(maize+1);
run;
/*
proc sort data=all3;
by beeh;
run;

proc print data=all3;
var beeh country;
run;
proc sort data=all3;
by pigs;
run;

proc print data=all3;
var pigs country;
run;

```

```

proc sort data=all3;
by chick;
run;

proc priest data=all3;
var chick country;
run;
*)

proc univariate data=all3 normal plots;
var logpigs pigs;
histogram;
run;

proc means data=all3;
run;

/***** CORR *****/

title " corr ";
proc corr data=all3 pearson spearman ;
var totalcases logtot;
with logswans logbeeh logbuffalo logcamels logcattle logchick logducks loggeeseand logsole loghorse 1
loggoats lograbbit logsheep logturkey logapples logmaize logbarley ;
;
run;

/***** REG *****/

title " logtot model complete ";
proc reg data=all3 ;
model logtot = logbeeh logcattle logchick logpigs
loggoats logsheep logturkey loghorse lograbbit logapples logmaize logbarley
/selection=stepwise slentry=0.10 slstay=0.05 vif ;
run;
quit;

/*****

```

```

/*****          LASSO          *****/

ods graphics on/ labelmax=400;
title " logtot model complete LASSO ";
proc gselect data=all3 plots=all ;
  model logtot = logbeeh logcattle logchick logpigs
               loggoats logsheep logturkey loghorse lograbbit logapples logsize logbari
  /selection=lasso (choose =cp steps=20 );
run;

ods rtf close;

/*****          PCA          *****/
/*****          model Complete          *****/
/*****          *****/

ods graphics on;

proc princomp data=all3 n=3 plots (ncomp=3)-pattern;
  sd country;
  var totalcases beeh cattle chick pigs
      apples maize barley;
title " logtot PCA of Food Consumption and COVID-19 Parameters model Complete ";
run;
ods rtf close;

/*****          Bayesian          *****/

ods graphics on ;
proc genmod data=all3;
  model logtot = logbeeh logcattle logchick logpigs
               loggoats logsheep logturkey loghorse lograbbit logapples logsize logher
               bayes seed=1234 OutPost=PostSung;
run;

ods rtf close;

/****          Statements compute the estimate of the probability of being positive *****/

```

```
data Prob;
  set PostSurp;
  beeh2=(logbeeh >0);

  catt12 = {logcattle > 0};
  goats2=(loggoats>0);
  sheep2=(logsheep>0);
  turkey2=(logturkey>0);

  chicks2=(logchick>0);

  pig2=(logpigs>0);
  horse2=(loghorse >0);
  rabbit2=(lograbbit >0);

  apple2=(logapples>0);
  barley2=(logbarley >0);
  maize2=(logmaize>0);

  run;

  title " totalcases freshfs2={freshf<0} ";
proc Means data = Prob(keep= beeh2 catt12 goats2 sheep2 chicks2 pig2 turkey2 horse2 rabbit2 apple2 ba
run;

quit;
```
